# Supplementary material for: Characterization of the far-red light absorbing light-harvesting chlorophyll a/b binding complex, a derivative of the distinctive Lhca gene family in green algae
Source: Front Plant Sci. 2024 Jun 10;15:1409116. doi: 10.3389/fpls.2024.1409116 (PMC11194369; doi:10.3389/fpls.2024.1409116)
Supplement: Supplementary file 3 [file DataSheet_3.xlsx]

## Sheet: Proteins_sort-InjPositive
															1										2
															Cultured strain						Antarctic sample				Cultured strain						Antarctic sample
Checked	Master	Accession	Description		Coverage [%]	# Peptides	# PSMs	# Unique Peptides	# Protein Groups	# AAs	MW [kDa]	calc. pI	Score Sequest HT: Sequest HT	# Peptides (by Search Engine): Sequest HT	20171101_blank01	29kDa_Fig.3C_closed star_1	20171101_blank02	32kDa_Fig.3C_closed triangle_1	20171101_blank03	25kDa_Fig.3C_closed square_1	20171101_blank04	29kDa_Fig.3D_open star_1	20171101_blank06	25kDa_Fig.3D_open square_1	20171202_blank01	29kDa_Fig.3C_closed star_2	20171202_blank02	32kDa_Fig.3C_closed triangle_2	20171202_blank03	25kDa_Fig.3C_closed square_2	20171202_blank04	29kDa_Fig.3D_open star_2	20171202_blank06	25kDa_Fig.3D_open square_2	20171202_blank07	Modifications
FALSE	Master Protein	pcri_g8716.t1	BDA47009.1 Photosystem I chlorophyll a/b-binding protein 3-1, chloroplastic [Coccomyxa sp. Obi]	Pc-frLHC1	58	10	414	1	1	292	31.8	6.06	1498.57	10	Not Found	Not Found	Not Found	Not Found	Not Found	Not Found	Not Found	Not Found	Not Found	Not Found	Not Found	Not Found	Not Found	Not Found	Not Found	Not Found	Not Found	Not Found	Not Found	Not Found	Not Found
	Checked	Confidence	Annotated Sequence		Modifications	Modifications in Master Proteins	# Protein Groups	# Proteins	# PSMs	Master Protein Accessions	Master Protein Descriptions	Positions in Master Proteins	# Missed Cleavages	Theo. MH+ [Da]	Found in Sample: [S11] F11: Sample	Found in Sample: [S1] F1: Sample	Found in Sample: [S12] F12: Sample	Found in Sample: [S2] F2: Sample	Found in Sample: [S13] F13: Sample	Found in Sample: [S3] F3: Sample	Found in Sample: [S14] F14: Sample	Found in Sample: [S4] F4: Sample	Found in Sample: [S16] F16: Sample	Found in Sample: [S6] F6: Sample	Found in Sample: [S30] F30: Sample	Found in Sample: [S20] F20: Sample	Found in Sample: [S31] F31: Sample	Found in Sample: [S21] F21: Sample	Found in Sample: [S32] F32: Sample	Found in Sample: [S22] F22: Sample	Found in Sample: [S33] F33: Sample	Found in Sample: [S23] F23: Sample	Found in Sample: [S35] F35: Sample	Found in Sample: [S25] F25: Sample	Found in Sample: [S36] F36: Sample	Confidence (by Search Engine): Sequest HT	XCorr (by Search Engine): Sequest HT	Sequence in Protein	Positions in Protein	Peptide Group Modifications in Protein
	FALSE	High	[R].WLLEGELYNGR.[LV]				4	4	232	pcri_g8720.t1; pcri_g8718.t1; pcri_g8045.t1; pcri_g8716.t1	pcri_g8720.t1 pcri_g8718.t1 pcri_g8045.t1 pcri_g8716.t1	pcri_g8720.t1 [55-65]; pcri_g8718.t1 [119-129]; pcri_g8045.t1 [114-124]; pcri_g8716.t1 [119-129]	0	1349.68	Not Found	High	High	High	High	High	High	High	High	High	Not Found	High	Not Found	High	Not Found	High	Not Found	High	Not Found	Not Found	Not Found	High	4.47	R.WLLEGELYNGR.V	[119-129]
		Checked	Confidence		Identifying Node	PSM Ambiguity	Annotated Sequence	Modifications	# Protein Groups	# Proteins	Master Protein Accessions	Protein Accessions	# Missed Cleavages	Charge	MS Order	DeltaScore	Isolation Interference [%]	DeltaCn	Ion Inject Time [ms]	Rank	RT [min]	Search Engine Rank	Spectrum File	MH+ [Da]
		FALSE	High		Sequest HT (Q2)	Unambiguous	[R].WLLEGELYNGR.[LV]		4	4	pcri_g8720.t1; pcri_g8718.t1; pcri_g8045.t1; pcri_g8716.t1	pcri_g8720.t1; pcri_g8718.t1; pcri_g8045.t1; pcri_g8716.t1	0	2	MS2	0.481		0	200	1	33.3113	1	20171202_04.RAW	1350.15
		FALSE	High		Sequest HT (AD2)	Unambiguous	[R].WLLEGELYNGR.[LV]		4	4	pcri_g8720.t1; pcri_g8718.t1; pcri_g8045.t1; pcri_g8716.t1	pcri_g8720.t1; pcri_g8718.t1; pcri_g8045.t1; pcri_g8716.t1	0	2	MS2	0.537		0	200	1	58.2889	1	20171101_10.RAW	1351.69
		FALSE	High		Sequest HT (AD2)	Unambiguous	[R].WLLEGELYNGR.[LV]		4	4	pcri_g8720.t1; pcri_g8718.t1; pcri_g8045.t1; pcri_g8716.t1	pcri_g8720.t1; pcri_g8718.t1; pcri_g8045.t1; pcri_g8716.t1	0	2	MS2	0.5361		0	200	1	47.0399	1	20171101_10.RAW	1350.55
		FALSE	High		Sequest HT (S2)	Unambiguous	[R].WLLEGELYNGR.[LV]		4	4	pcri_g8720.t1; pcri_g8718.t1; pcri_g8045.t1; pcri_g8716.t1	pcri_g8720.t1; pcri_g8718.t1; pcri_g8045.t1; pcri_g8716.t1	0	2	MS2	0.534		0	200	1	32.977	1	20171202_02.RAW	1350.47
		FALSE	High		Sequest HT (K2)	Unambiguous	[R].WLLEGELYNGR.[LV]		4	4	pcri_g8720.t1; pcri_g8718.t1; pcri_g8045.t1; pcri_g8716.t1	pcri_g8720.t1; pcri_g8718.t1; pcri_g8045.t1; pcri_g8716.t1	0	2	MS2	0.467		0	200	1	33.95	1	20171202_10.RAW	1351.2
		FALSE	High		Sequest HT (AJ2)	Unambiguous	[R].WLLEGELYNGR.[LV]		4	4	pcri_g8720.t1; pcri_g8718.t1; pcri_g8045.t1; pcri_g8716.t1	pcri_g8720.t1; pcri_g8718.t1; pcri_g8045.t1; pcri_g8716.t1	0	2	MS2	0.5849		0	200	1	46.6093	1	20171101_04.RAW	1350.56
		FALSE	High		Sequest HT (AD2)	Unambiguous	[R].WLLEGELYNGR.[LV]		4	4	pcri_g8720.t1; pcri_g8718.t1; pcri_g8045.t1; pcri_g8716.t1	pcri_g8720.t1; pcri_g8718.t1; pcri_g8045.t1; pcri_g8716.t1	0	2	MS2	0.5319		0	200	1	57.7429	1	20171101_10.RAW	1350.48
		FALSE	High		Sequest HT (P2)	Unambiguous	[R].WLLEGELYNGR.[LV]		4	4	pcri_g8720.t1; pcri_g8718.t1; pcri_g8045.t1; pcri_g8716.t1	pcri_g8720.t1; pcri_g8718.t1; pcri_g8045.t1; pcri_g8716.t1	0	2	MS2	0.5201		0	200	1	32.1449	1	20171202_05.RAW	1350.22
		FALSE	High		Sequest HT (AJ2)	Unambiguous	[R].WLLEGELYNGR.[LV]		4	4	pcri_g8720.t1; pcri_g8718.t1; pcri_g8045.t1; pcri_g8716.t1	pcri_g8720.t1; pcri_g8718.t1; pcri_g8045.t1; pcri_g8716.t1	0	2	MS2	0.5071		0	200	1	58.9083	1	20171101_04.RAW	1351.44
		FALSE	High		Sequest HT (AD2)	Unambiguous	[R].WLLEGELYNGR.[LV]		4	4	pcri_g8720.t1; pcri_g8718.t1; pcri_g8045.t1; pcri_g8716.t1	pcri_g8720.t1; pcri_g8718.t1; pcri_g8045.t1; pcri_g8716.t1	0	2	MS2	0.4893		0	200	1	34.8911	1	20171101_10.RAW	1349.65
		FALSE	High		Sequest HT (AJ2)	Unambiguous	[R].WLLEGELYNGR.[LV]		4	4	pcri_g8720.t1; pcri_g8718.t1; pcri_g8045.t1; pcri_g8716.t1	pcri_g8720.t1; pcri_g8718.t1; pcri_g8045.t1; pcri_g8716.t1	0	2	MS2	0.5333		0	200	1	49.9738	1	20171101_04.RAW	1351.57
		FALSE	High		Sequest HT (AD2)	Unambiguous	[R].WLLEGELYNGR.[LV]		4	4	pcri_g8720.t1; pcri_g8718.t1; pcri_g8045.t1; pcri_g8716.t1	pcri_g8720.t1; pcri_g8718.t1; pcri_g8045.t1; pcri_g8716.t1	0	2	MS2	0.5048		0	200	1	35.5361	1	20171101_10.RAW	1351.34
		FALSE	High		Sequest HT (Y2)	Unambiguous	[R].WLLEGELYNGR.[LV]		4	4	pcri_g8720.t1; pcri_g8718.t1; pcri_g8045.t1; pcri_g8716.t1	pcri_g8720.t1; pcri_g8718.t1; pcri_g8045.t1; pcri_g8716.t1	0	2	MS2	0.5096		0	200	1	34.7287	1	20171101_blank05.RAW	1350.57
		FALSE	High		Sequest HT (K2)	Unambiguous	[R].WLLEGELYNGR.[LV]		4	4	pcri_g8720.t1; pcri_g8718.t1; pcri_g8045.t1; pcri_g8716.t1	pcri_g8720.t1; pcri_g8718.t1; pcri_g8045.t1; pcri_g8716.t1	0	2	MS2	0.5933		0	200	1	33.3824	1	20171202_10.RAW	1350.3
		FALSE	High		Sequest HT (Q2)	Unambiguous	[R].WLLEGELYNGR.[LV]		4	4	pcri_g8720.t1; pcri_g8718.t1; pcri_g8045.t1; pcri_g8716.t1	pcri_g8720.t1; pcri_g8718.t1; pcri_g8045.t1; pcri_g8716.t1	0	2	MS2	0.554		0	131.046	1	32.1857	1	20171202_04.RAW	1352.46
		FALSE	High		Sequest HT (AD2)	Unambiguous	[R].WLLEGELYNGR.[LV]		4	4	pcri_g8720.t1; pcri_g8718.t1; pcri_g8045.t1; pcri_g8716.t1	pcri_g8720.t1; pcri_g8718.t1; pcri_g8045.t1; pcri_g8716.t1	0	2	MS2	0.5505		0	200	1	59.4527	1	20171101_10.RAW	1351.51
		FALSE	High		Sequest HT (AD2)	Unambiguous	[R].WLLEGELYNGR.[LV]		4	4	pcri_g8720.t1; pcri_g8718.t1; pcri_g8045.t1; pcri_g8716.t1	pcri_g8720.t1; pcri_g8718.t1; pcri_g8045.t1; pcri_g8716.t1	0	2	MS2	0.5529		0	200	1	48.72	1	20171101_10.RAW	1350.55
		FALSE	High		Sequest HT (AJ2)	Unambiguous	[R].WLLEGELYNGR.[LV]		4	4	pcri_g8720.t1; pcri_g8718.t1; pcri_g8045.t1; pcri_g8716.t1	pcri_g8720.t1; pcri_g8718.t1; pcri_g8045.t1; pcri_g8716.t1	0	2	MS2	0.5628		0	200	1	35.2517	1	20171101_04.RAW	1350.32
		FALSE	High		Sequest HT (R2)	Unambiguous	[R].WLLEGELYNGR.[LV]		4	4	pcri_g8720.t1; pcri_g8718.t1; pcri_g8045.t1; pcri_g8716.t1	pcri_g8720.t1; pcri_g8718.t1; pcri_g8045.t1; pcri_g8716.t1	0	2	MS2	0.5193		0	200	1	32.5997	1	20171202_03.RAW	1350.72
		FALSE	High		Sequest HT (AD2)	Unambiguous	[R].WLLEGELYNGR.[LV]		4	4	pcri_g8720.t1; pcri_g8718.t1; pcri_g8045.t1; pcri_g8716.t1	pcri_g8720.t1; pcri_g8718.t1; pcri_g8045.t1; pcri_g8716.t1	0	2	MS2	0.57		0	200	1	54.0876	1	20171101_10.RAW	1350.45
		FALSE	High		Sequest HT (Q2)	Unambiguous	[R].WLLEGELYNGR.[LV]		4	4	pcri_g8720.t1; pcri_g8718.t1; pcri_g8045.t1; pcri_g8716.t1	pcri_g8720.t1; pcri_g8718.t1; pcri_g8045.t1; pcri_g8716.t1	0	2	MS2	0.5327		0	167.959	1	32.7276	1	20171202_04.RAW	1350.06
		FALSE	High		Sequest HT (U2)	Unambiguous	[R].WLLEGELYNGR.[LV]		4	4	pcri_g8720.t1; pcri_g8718.t1; pcri_g8045.t1; pcri_g8716.t1	pcri_g8720.t1; pcri_g8718.t1; pcri_g8045.t1; pcri_g8716.t1	0	2	MS2	0.5496		0	200	1	34.6248	1	20171101_blank09.RAW	1351.39
		FALSE	High		Sequest HT (AJ2)	Unambiguous	[R].WLLEGELYNGR.[LV]		4	4	pcri_g8720.t1; pcri_g8718.t1; pcri_g8045.t1; pcri_g8716.t1	pcri_g8720.t1; pcri_g8718.t1; pcri_g8045.t1; pcri_g8716.t1	0	2	MS2	0.5157		0	200	1	44.2289	1	20171101_04.RAW	1350.48
		FALSE	High		Sequest HT (AD2)	Unambiguous	[R].WLLEGELYNGR.[LV]		4	4	pcri_g8720.t1; pcri_g8718.t1; pcri_g8045.t1; pcri_g8716.t1	pcri_g8720.t1; pcri_g8718.t1; pcri_g8045.t1; pcri_g8716.t1	0	2	MS2	0.5572		0	200	1	55.3082	1	20171101_10.RAW	1350.33
		FALSE	High		Sequest HT (AD2)	Unambiguous	[R].WLLEGELYNGR.[LV]		4	4	pcri_g8720.t1; pcri_g8718.t1; pcri_g8045.t1; pcri_g8716.t1	pcri_g8720.t1; pcri_g8718.t1; pcri_g8045.t1; pcri_g8716.t1	0	2	MS2	0.5232		0	200	1	49.3408	1	20171101_10.RAW	1350.56
		FALSE	High		Sequest HT (S2)	Unambiguous	[R].WLLEGELYNGR.[LV]		4	4	pcri_g8720.t1; pcri_g8718.t1; pcri_g8045.t1; pcri_g8716.t1	pcri_g8720.t1; pcri_g8718.t1; pcri_g8045.t1; pcri_g8716.t1	0	2	MS2	0.5135		0	195.23	1	32.4281	1	20171202_02.RAW	1349.88
		FALSE	High		Sequest HT (AG2)	Unambiguous	[R].WLLEGELYNGR.[LV]		4	4	pcri_g8720.t1; pcri_g8718.t1; pcri_g8045.t1; pcri_g8716.t1	pcri_g8720.t1; pcri_g8718.t1; pcri_g8045.t1; pcri_g8716.t1	0	2	MS2	0.5332		0	97.362	1	34.2991	1	20171101_07.RAW	1350.45
		FALSE	High		Sequest HT (AJ2)	Unambiguous	[R].WLLEGELYNGR.[LV]		4	4	pcri_g8720.t1; pcri_g8718.t1; pcri_g8045.t1; pcri_g8716.t1	pcri_g8720.t1; pcri_g8718.t1; pcri_g8045.t1; pcri_g8716.t1	0	2	MS2	0.5369		0	200	1	59.9981	1	20171101_04.RAW	1350.53
		FALSE	High		Sequest HT (AJ2)	Unambiguous	[R].WLLEGELYNGR.[LV]		4	4	pcri_g8720.t1; pcri_g8718.t1; pcri_g8045.t1; pcri_g8716.t1	pcri_g8720.t1; pcri_g8718.t1; pcri_g8045.t1; pcri_g8716.t1	0	2	MS2	0.521		0	200	1	42.297	1	20171101_04.RAW	1350.45
		FALSE	High		Sequest HT (AD2)	Unambiguous	[R].WLLEGELYNGR.[LV]		4	4	pcri_g8720.t1; pcri_g8718.t1; pcri_g8045.t1; pcri_g8716.t1	pcri_g8720.t1; pcri_g8718.t1; pcri_g8045.t1; pcri_g8716.t1	0	2	MS2	0.5309		0	200	1	50.9998	1	20171101_10.RAW	1350.76
		FALSE	High		Sequest HT (AJ2)	Unambiguous	[R].WLLEGELYNGR.[LV]		4	4	pcri_g8720.t1; pcri_g8718.t1; pcri_g8045.t1; pcri_g8716.t1	pcri_g8720.t1; pcri_g8718.t1; pcri_g8045.t1; pcri_g8716.t1	0	2	MS2	0.5704		0	200	1	46.0542	1	20171101_04.RAW	1350.75
		FALSE	High		Sequest HT (K2)	Unambiguous	[R].WLLEGELYNGR.[LV]		4	4	pcri_g8720.t1; pcri_g8718.t1; pcri_g8045.t1; pcri_g8716.t1	pcri_g8720.t1; pcri_g8718.t1; pcri_g8045.t1; pcri_g8716.t1	0	2	MS2	0.552		0	200	1	32.1416	1	20171202_10.RAW	1350.32
		FALSE	High		Sequest HT (AD2)	Unambiguous	[R].WLLEGELYNGR.[LV]		4	4	pcri_g8720.t1; pcri_g8718.t1; pcri_g8045.t1; pcri_g8716.t1	pcri_g8720.t1; pcri_g8718.t1; pcri_g8045.t1; pcri_g8716.t1	0	2	MS2	0.4938		0	200	1	58.8386	1	20171101_10.RAW	1351.28
		FALSE	High		Sequest HT (AG2)	Unambiguous	[R].WLLEGELYNGR.[LV]		4	4	pcri_g8720.t1; pcri_g8718.t1; pcri_g8045.t1; pcri_g8716.t1	pcri_g8720.t1; pcri_g8718.t1; pcri_g8045.t1; pcri_g8716.t1	0	2	MS2	0.5174		0	200	1	43.6272	1	20171101_07.RAW	1351.38
		FALSE	High		Sequest HT (AD2)	Unambiguous	[R].WLLEGELYNGR.[LV]		4	4	pcri_g8720.t1; pcri_g8718.t1; pcri_g8045.t1; pcri_g8716.t1	pcri_g8720.t1; pcri_g8718.t1; pcri_g8045.t1; pcri_g8716.t1	0	2	MS2	0.5411		0	200	1	34.3425	1	20171101_10.RAW	1350.43
		FALSE	High		Sequest HT (P2)	Unambiguous	[R].WLLEGELYNGR.[LV]		4	4	pcri_g8720.t1; pcri_g8718.t1; pcri_g8045.t1; pcri_g8716.t1	pcri_g8720.t1; pcri_g8718.t1; pcri_g8045.t1; pcri_g8716.t1	0	2	MS2	0.4888		0	200	1	34.2263	1	20171202_05.RAW	1350.72
		FALSE	High		Sequest HT (AI2)	Unambiguous	[R].WLLEGELYNGR.[LV]		4	4	pcri_g8720.t1; pcri_g8718.t1; pcri_g8045.t1; pcri_g8716.t1	pcri_g8720.t1; pcri_g8718.t1; pcri_g8045.t1; pcri_g8716.t1	0	2	MS2	0.5038		0	200	1	34.6543	1	20171101_05.RAW	1350.06
		FALSE	High		Sequest HT (M2)	Unambiguous	[R].WLLEGELYNGR.[LV]		4	4	pcri_g8720.t1; pcri_g8718.t1; pcri_g8045.t1; pcri_g8716.t1	pcri_g8720.t1; pcri_g8718.t1; pcri_g8045.t1; pcri_g8716.t1	0	2	MS2	0.4987		0	200	1	32.3297	1	20171202_08.RAW	1352.38
		FALSE	High		Sequest HT (N2)	Unambiguous	[R].WLLEGELYNGR.[LV]		4	4	pcri_g8720.t1; pcri_g8718.t1; pcri_g8045.t1; pcri_g8716.t1	pcri_g8720.t1; pcri_g8718.t1; pcri_g8045.t1; pcri_g8716.t1	0	2	MS2	0.5264		0	200	1	31.9466	1	20171202_07.RAW	1350.45
		FALSE	High		Sequest HT (AL2)	Unambiguous	[R].WLLEGELYNGR.[LV]		4	4	pcri_g8720.t1; pcri_g8718.t1; pcri_g8045.t1; pcri_g8716.t1	pcri_g8720.t1; pcri_g8718.t1; pcri_g8045.t1; pcri_g8716.t1	0	2	MS2	0.471		0	200	1	35.0702	1	20171101_02.RAW	1351.24
		FALSE	High		Sequest HT (AD2)	Unambiguous	[R].WLLEGELYNGR.[LV]		4	4	pcri_g8720.t1; pcri_g8718.t1; pcri_g8045.t1; pcri_g8716.t1	pcri_g8720.t1; pcri_g8718.t1; pcri_g8045.t1; pcri_g8716.t1	0	2	MS2	0.5		0	200	1	37.1643	1	20171101_10.RAW	1351
		FALSE	High		Sequest HT (R2)	Unambiguous	[R].WLLEGELYNGR.[LV]		4	4	pcri_g8720.t1; pcri_g8718.t1; pcri_g8045.t1; pcri_g8716.t1	pcri_g8720.t1; pcri_g8718.t1; pcri_g8045.t1; pcri_g8716.t1	0	2	MS2	0.5505		0	200	1	31.8291	1	20171202_03.RAW	1350.46
		FALSE	High		Sequest HT (AJ2)	Unambiguous	[R].WLLEGELYNGR.[LV]		4	4	pcri_g8720.t1; pcri_g8718.t1; pcri_g8045.t1; pcri_g8716.t1	pcri_g8720.t1; pcri_g8718.t1; pcri_g8045.t1; pcri_g8716.t1	0	2	MS2	0.5126		0	200	1	58.3607	1	20171101_04.RAW	1350.1
		FALSE	High		Sequest HT (AK2)	Unambiguous	[R].WLLEGELYNGR.[LV]		4	4	pcri_g8720.t1; pcri_g8718.t1; pcri_g8045.t1; pcri_g8716.t1	pcri_g8720.t1; pcri_g8718.t1; pcri_g8045.t1; pcri_g8716.t1	0	2	MS2	0.5418		0	200	1	34.4824	1	20171101_03.RAW	1350.33
		FALSE	High		Sequest HT (AI2)	Unambiguous	[R].WLLEGELYNGR.[LV]		4	4	pcri_g8720.t1; pcri_g8718.t1; pcri_g8045.t1; pcri_g8716.t1	pcri_g8720.t1; pcri_g8718.t1; pcri_g8045.t1; pcri_g8716.t1	0	2	MS2	0.5544		0	200	1	46.2502	1	20171101_05.RAW	1350.49
		FALSE	High		Sequest HT (AD2)	Unambiguous	[R].WLLEGELYNGR.[LV]		4	4	pcri_g8720.t1; pcri_g8718.t1; pcri_g8045.t1; pcri_g8716.t1	pcri_g8720.t1; pcri_g8718.t1; pcri_g8045.t1; pcri_g8716.t1	0	2	MS2	0.5089		0	200	1	36.3017	1	20171101_10.RAW	1350.66
		FALSE	High		Sequest HT (AI2)	Unambiguous	[R].WLLEGELYNGR.[LV]		4	4	pcri_g8720.t1; pcri_g8718.t1; pcri_g8045.t1; pcri_g8716.t1	pcri_g8720.t1; pcri_g8718.t1; pcri_g8045.t1; pcri_g8716.t1	0	2	MS2	0.5761		0	200	1	58.5217	1	20171101_05.RAW	1350.24
		FALSE	High		Sequest HT (AD2)	Unambiguous	[R].WLLEGELYNGR.[LV]		4	4	pcri_g8720.t1; pcri_g8718.t1; pcri_g8045.t1; pcri_g8716.t1	pcri_g8720.t1; pcri_g8718.t1; pcri_g8045.t1; pcri_g8716.t1	0	2	MS2	0.4645		0	200	1	54.713	1	20171101_10.RAW	1351.45
		FALSE	High		Sequest HT (K2)	Unambiguous	[R].WLLEGELYNGR.[LV]		4	4	pcri_g8720.t1; pcri_g8718.t1; pcri_g8045.t1; pcri_g8716.t1	pcri_g8720.t1; pcri_g8718.t1; pcri_g8045.t1; pcri_g8716.t1	0	2	MS2	0.5598		0	200	1	32.6883	1	20171202_10.RAW	1349.75
		FALSE	High		Sequest HT (AD2)	Unambiguous	[R].WLLEGELYNGR.[LV]		4	4	pcri_g8720.t1; pcri_g8718.t1; pcri_g8045.t1; pcri_g8716.t1	pcri_g8720.t1; pcri_g8718.t1; pcri_g8045.t1; pcri_g8716.t1	0	2	MS2	0.4427		0	200	1	47.5958	1	20171101_10.RAW	1351.47
		FALSE	High		Sequest HT (AJ2)	Unambiguous	[R].WLLEGELYNGR.[LV]		4	4	pcri_g8720.t1; pcri_g8718.t1; pcri_g8045.t1; pcri_g8716.t1	pcri_g8720.t1; pcri_g8718.t1; pcri_g8045.t1; pcri_g8716.t1	0	2	MS2	0.5612		0	200	1	47.1938	1	20171101_04.RAW	1350.52
		FALSE	High		Sequest HT (V2)	Unambiguous	[R].WLLEGELYNGR.[LV]		4	4	pcri_g8720.t1; pcri_g8718.t1; pcri_g8045.t1; pcri_g8716.t1	pcri_g8720.t1; pcri_g8718.t1; pcri_g8045.t1; pcri_g8716.t1	0	2	MS2	0.5051		0	200	1	58.4834	1	20171101_blank08.RAW	1351.68
		FALSE	High		Sequest HT (AI2)	Unambiguous	[R].WLLEGELYNGR.[LV]		4	4	pcri_g8720.t1; pcri_g8718.t1; pcri_g8045.t1; pcri_g8716.t1	pcri_g8720.t1; pcri_g8718.t1; pcri_g8045.t1; pcri_g8716.t1	0	2	MS2	0.5448		0	200	1	38.6709	1	20171101_05.RAW	1350.93
		FALSE	High		Sequest HT (AJ2)	Unambiguous	[R].WLLEGELYNGR.[LV]		4	4	pcri_g8720.t1; pcri_g8718.t1; pcri_g8045.t1; pcri_g8716.t1	pcri_g8720.t1; pcri_g8718.t1; pcri_g8045.t1; pcri_g8716.t1	0	2	MS2	0.5908		0	200	1	53.9418	1	20171101_04.RAW	1350.57
		FALSE	High		Sequest HT (AL2)	Unambiguous	[R].WLLEGELYNGR.[LV]		4	4	pcri_g8720.t1; pcri_g8718.t1; pcri_g8045.t1; pcri_g8716.t1	pcri_g8720.t1; pcri_g8718.t1; pcri_g8045.t1; pcri_g8716.t1	0	2	MS2	0.4706		0	200	1	34.5014	1	20171101_02.RAW	1350
		FALSE	High		Sequest HT (AJ2)	Unambiguous	[R].WLLEGELYNGR.[LV]		4	4	pcri_g8720.t1; pcri_g8718.t1; pcri_g8045.t1; pcri_g8716.t1	pcri_g8720.t1; pcri_g8718.t1; pcri_g8045.t1; pcri_g8716.t1	0	2	MS2	0.5154		0	200	1	37.8915	1	20171101_04.RAW	1350.49
		FALSE	High		Sequest HT (AI2)	Unambiguous	[R].WLLEGELYNGR.[LV]		4	4	pcri_g8720.t1; pcri_g8718.t1; pcri_g8045.t1; pcri_g8716.t1	pcri_g8720.t1; pcri_g8718.t1; pcri_g8045.t1; pcri_g8716.t1	0	2	MS2	0.5872		0	200	1	59.7176	1	20171101_05.RAW	1350.47
		FALSE	High		Sequest HT (AJ2)	Unambiguous	[R].WLLEGELYNGR.[LV]		4	4	pcri_g8720.t1; pcri_g8718.t1; pcri_g8045.t1; pcri_g8716.t1	pcri_g8720.t1; pcri_g8718.t1; pcri_g8045.t1; pcri_g8716.t1	0	2	MS2	0.4744		0	200	1	57.8151	1	20171101_04.RAW	1350.34
		FALSE	High		Sequest HT (AD2)	Unambiguous	[R].WLLEGELYNGR.[LV]		4	4	pcri_g8720.t1; pcri_g8718.t1; pcri_g8045.t1; pcri_g8716.t1	pcri_g8720.t1; pcri_g8718.t1; pcri_g8045.t1; pcri_g8716.t1	0	2	MS2	0.5026		0	200	1	60.003	1	20171101_10.RAW	1351.4
		FALSE	High		Sequest HT (AD2)	Unambiguous	[R].WLLEGELYNGR.[LV]		4	4	pcri_g8720.t1; pcri_g8718.t1; pcri_g8045.t1; pcri_g8716.t1	pcri_g8720.t1; pcri_g8718.t1; pcri_g8045.t1; pcri_g8716.t1	0	2	MS2	0.4256		0	101.373	1	34.44	1	20171101_10.RAW	1353.57
		FALSE	High		Sequest HT (Q2)	Unambiguous	[R].WLLEGELYNGR.[LV]		4	4	pcri_g8720.t1; pcri_g8718.t1; pcri_g8045.t1; pcri_g8716.t1	pcri_g8720.t1; pcri_g8718.t1; pcri_g8045.t1; pcri_g8716.t1	0	2	MS2	0.5129		0	200	1	39.7902	1	20171202_04.RAW	1351.98
		FALSE	High		Sequest HT (AJ2)	Unambiguous	[R].WLLEGELYNGR.[LV]		4	4	pcri_g8720.t1; pcri_g8718.t1; pcri_g8045.t1; pcri_g8716.t1	pcri_g8720.t1; pcri_g8718.t1; pcri_g8045.t1; pcri_g8716.t1	0	2	MS2	0.5438		0	200	1	55.5994	1	20171101_04.RAW	1350.47
		FALSE	High		Sequest HT (AJ2)	Unambiguous	[R].WLLEGELYNGR.[LV]		4	4	pcri_g8720.t1; pcri_g8718.t1; pcri_g8045.t1; pcri_g8716.t1	pcri_g8720.t1; pcri_g8718.t1; pcri_g8045.t1; pcri_g8716.t1	0	2	MS2	0.5685		0	200	1	59.4534	1	20171101_04.RAW	1349.76
		FALSE	High		Sequest HT (AJ2)	Unambiguous	[R].WLLEGELYNGR.[LV]		4	4	pcri_g8720.t1; pcri_g8718.t1; pcri_g8045.t1; pcri_g8716.t1	pcri_g8720.t1; pcri_g8718.t1; pcri_g8045.t1; pcri_g8716.t1	0	2	MS2	0.4755		0	200	1	41.0718	1	20171101_04.RAW	1350.21
		FALSE	High		Sequest HT (AD2)	Unambiguous	[R].WLLEGELYNGR.[LV]		4	4	pcri_g8720.t1; pcri_g8718.t1; pcri_g8045.t1; pcri_g8716.t1	pcri_g8720.t1; pcri_g8718.t1; pcri_g8045.t1; pcri_g8716.t1	0	2	MS2	0.4663		0	200	1	43.1495	1	20171101_10.RAW	1350.63
		FALSE	High		Sequest HT (AJ2)	Unambiguous	[R].WLLEGELYNGR.[LV]		4	4	pcri_g8720.t1; pcri_g8718.t1; pcri_g8045.t1; pcri_g8716.t1	pcri_g8720.t1; pcri_g8718.t1; pcri_g8045.t1; pcri_g8716.t1	0	2	MS2	0.557		0	200	1	57.2462	1	20171101_04.RAW	1350.35
		FALSE	High		Sequest HT (Q2)	Unambiguous	[R].WLLEGELYNGR.[LV]		4	4	pcri_g8720.t1; pcri_g8718.t1; pcri_g8045.t1; pcri_g8716.t1	pcri_g8720.t1; pcri_g8718.t1; pcri_g8045.t1; pcri_g8716.t1	0	2	MS2	0.5221		0	200	1	34.4292	1	20171202_04.RAW	1350.64
		FALSE	High		Sequest HT (AJ2)	Unambiguous	[R].WLLEGELYNGR.[LV]		4	4	pcri_g8720.t1; pcri_g8718.t1; pcri_g8045.t1; pcri_g8716.t1	pcri_g8720.t1; pcri_g8718.t1; pcri_g8045.t1; pcri_g8716.t1	0	2	MS2	0.4442		0	44.52	1	34.1474	1	20171101_04.RAW	1353.19
		FALSE	High		Sequest HT (AJ2)	Unambiguous	[R].WLLEGELYNGR.[LV]		4	4	pcri_g8720.t1; pcri_g8718.t1; pcri_g8045.t1; pcri_g8716.t1	pcri_g8720.t1; pcri_g8718.t1; pcri_g8045.t1; pcri_g8716.t1	0	2	MS2	0.5339		0	200	1	34.0092	1	20171101_04.RAW	1350.01
		FALSE	High		Sequest HT (Q2)	Unambiguous	[R].WLLEGELYNGR.[LV]		4	4	pcri_g8720.t1; pcri_g8718.t1; pcri_g8045.t1; pcri_g8716.t1	pcri_g8720.t1; pcri_g8718.t1; pcri_g8045.t1; pcri_g8716.t1	0	2	MS2	0.5234		0	200	1	33.8663	1	20171202_04.RAW	1351.37
		FALSE	High		Sequest HT (AJ2)	Unambiguous	[R].WLLEGELYNGR.[LV]		4	4	pcri_g8720.t1; pcri_g8718.t1; pcri_g8045.t1; pcri_g8716.t1	pcri_g8720.t1; pcri_g8718.t1; pcri_g8045.t1; pcri_g8716.t1	0	2	MS2	0.5222		0	200	1	43.5643	1	20171101_04.RAW	1350.22
		FALSE	High		Sequest HT (P2)	Unambiguous	[R].WLLEGELYNGR.[LV]		4	4	pcri_g8720.t1; pcri_g8718.t1; pcri_g8045.t1; pcri_g8716.t1	pcri_g8720.t1; pcri_g8718.t1; pcri_g8045.t1; pcri_g8716.t1	0	2	MS2	0.5497		0	200	1	33.4544	1	20171202_05.RAW	1350.36
		FALSE	High		Sequest HT (AD2)	Unambiguous	[R].WLLEGELYNGR.[LV]		4	4	pcri_g8720.t1; pcri_g8718.t1; pcri_g8045.t1; pcri_g8716.t1	pcri_g8720.t1; pcri_g8718.t1; pcri_g8045.t1; pcri_g8716.t1	0	2	MS2	0.5		0	200	1	50.4427	1	20171101_10.RAW	1350.5
		FALSE	High		Sequest HT (AM2)	Unambiguous	[R].WLLEGELYNGR.[LV]		4	4	pcri_g8720.t1; pcri_g8718.t1; pcri_g8045.t1; pcri_g8716.t1	pcri_g8720.t1; pcri_g8718.t1; pcri_g8045.t1; pcri_g8716.t1	0	2	MS2	0.5393		0	200	1	34.487	1	20171101_01.RAW	1350.29
		FALSE	High		Sequest HT (AJ2)	Unambiguous	[R].WLLEGELYNGR.[LV]		4	4	pcri_g8720.t1; pcri_g8718.t1; pcri_g8045.t1; pcri_g8716.t1	pcri_g8720.t1; pcri_g8718.t1; pcri_g8045.t1; pcri_g8716.t1	0	2	MS2	0.5079		0	200	1	34.6925	1	20171101_04.RAW	1350.49
		FALSE	High		Sequest HT (AL2)	Unambiguous	[R].WLLEGELYNGR.[LV]		4	4	pcri_g8720.t1; pcri_g8718.t1; pcri_g8045.t1; pcri_g8716.t1	pcri_g8720.t1; pcri_g8718.t1; pcri_g8045.t1; pcri_g8716.t1	0	2	MS2	0.5445		0	200	1	33.8651	1	20171101_02.RAW	1350.27
		FALSE	High		Sequest HT (AI2)	Unambiguous	[R].WLLEGELYNGR.[LV]		4	4	pcri_g8720.t1; pcri_g8718.t1; pcri_g8045.t1; pcri_g8716.t1	pcri_g8720.t1; pcri_g8718.t1; pcri_g8045.t1; pcri_g8716.t1	0	2	MS2	0.5092		0	200	1	35.3219	1	20171101_05.RAW	1350.51
		FALSE	High		Sequest HT (AD2)	Unambiguous	[R].WLLEGELYNGR.[LV]		4	4	pcri_g8720.t1; pcri_g8718.t1; pcri_g8045.t1; pcri_g8716.t1	pcri_g8720.t1; pcri_g8718.t1; pcri_g8045.t1; pcri_g8716.t1	0	2	MS2	0.4436		0	200	1	43.8876	1	20171101_10.RAW	1350.73
		FALSE	High		Sequest HT (AJ2)	Unambiguous	[R].WLLEGELYNGR.[LV]		4	4	pcri_g8720.t1; pcri_g8718.t1; pcri_g8045.t1; pcri_g8716.t1	pcri_g8720.t1; pcri_g8718.t1; pcri_g8045.t1; pcri_g8716.t1	0	2	MS2	0.5407		0	200	1	51.0729	1	20171101_04.RAW	1350.29
		FALSE	High		Sequest HT (AD2)	Unambiguous	[R].WLLEGELYNGR.[LV]		4	4	pcri_g8720.t1; pcri_g8718.t1; pcri_g8045.t1; pcri_g8716.t1	pcri_g8720.t1; pcri_g8718.t1; pcri_g8045.t1; pcri_g8716.t1	0	2	MS2	0.5579		0	200	1	55.9145	1	20171101_10.RAW	1350.44
		FALSE	High		Sequest HT (AD2)	Unambiguous	[R].WLLEGELYNGR.[LV]		4	4	pcri_g8720.t1; pcri_g8718.t1; pcri_g8045.t1; pcri_g8716.t1	pcri_g8720.t1; pcri_g8718.t1; pcri_g8045.t1; pcri_g8716.t1	0	2	MS2	0.5079		0	200	1	39.0388	1	20171101_10.RAW	1350.22
		FALSE	High		Sequest HT (AJ2)	Unambiguous	[R].WLLEGELYNGR.[LV]		4	4	pcri_g8720.t1; pcri_g8718.t1; pcri_g8045.t1; pcri_g8716.t1	pcri_g8720.t1; pcri_g8718.t1; pcri_g8045.t1; pcri_g8716.t1	0	2	MS2	0.5053		0	200	1	47.7365	1	20171101_04.RAW	1350.4
		FALSE	High		Sequest HT (AI2)	Unambiguous	[R].WLLEGELYNGR.[LV]		4	4	pcri_g8720.t1; pcri_g8718.t1; pcri_g8045.t1; pcri_g8716.t1	pcri_g8720.t1; pcri_g8718.t1; pcri_g8045.t1; pcri_g8716.t1	0	2	MS2	0.5172		0	200	1	55.093	1	20171101_05.RAW	1350.69
		FALSE	High		Sequest HT (AG2)	Unambiguous	[R].WLLEGELYNGR.[LV]		4	4	pcri_g8720.t1; pcri_g8718.t1; pcri_g8045.t1; pcri_g8716.t1	pcri_g8720.t1; pcri_g8718.t1; pcri_g8045.t1; pcri_g8716.t1	0	2	MS2	0.4063		0	200	1	54.0326	1	20171101_07.RAW	1351.29
		FALSE	High		Sequest HT (AI2)	Unambiguous	[R].WLLEGELYNGR.[LV]		4	4	pcri_g8720.t1; pcri_g8718.t1; pcri_g8045.t1; pcri_g8716.t1	pcri_g8720.t1; pcri_g8718.t1; pcri_g8045.t1; pcri_g8716.t1	0	2	MS2	0.5251		0	200	1	57.9407	1	20171101_05.RAW	1350.3
		FALSE	High		Sequest HT (AJ2)	Unambiguous	[R].WLLEGELYNGR.[LV]		4	4	pcri_g8720.t1; pcri_g8718.t1; pcri_g8045.t1; pcri_g8716.t1	pcri_g8720.t1; pcri_g8718.t1; pcri_g8045.t1; pcri_g8716.t1	0	2	MS2	0.5805		0	200	1	49.4068	1	20171101_04.RAW	1350.42
		FALSE	High		Sequest HT (AD2)	Unambiguous	[R].WLLEGELYNGR.[LV]		4	4	pcri_g8720.t1; pcri_g8718.t1; pcri_g8045.t1; pcri_g8716.t1	pcri_g8720.t1; pcri_g8718.t1; pcri_g8045.t1; pcri_g8716.t1	0	2	MS2	0.5397		0	200	1	44.5966	1	20171101_10.RAW	1350.36
		FALSE	High		Sequest HT (AD2)	Unambiguous	[R].WLLEGELYNGR.[LV]		4	4	pcri_g8720.t1; pcri_g8718.t1; pcri_g8045.t1; pcri_g8716.t1	pcri_g8720.t1; pcri_g8718.t1; pcri_g8045.t1; pcri_g8716.t1	0	2	MS2	0.5358		0	200	1	45.881	1	20171101_10.RAW	1350.1
		FALSE	High		Sequest HT (AJ2)	Unambiguous	[R].WLLEGELYNGR.[LV]		4	4	pcri_g8720.t1; pcri_g8718.t1; pcri_g8045.t1; pcri_g8716.t1	pcri_g8720.t1; pcri_g8718.t1; pcri_g8045.t1; pcri_g8716.t1	0	2	MS2	0.5252		0	200	1	41.7283	1	20171101_04.RAW	1350.39
		FALSE	High		Sequest HT (AD2)	Unambiguous	[R].WLLEGELYNGR.[LV]		4	4	pcri_g8720.t1; pcri_g8718.t1; pcri_g8045.t1; pcri_g8716.t1	pcri_g8720.t1; pcri_g8718.t1; pcri_g8045.t1; pcri_g8716.t1	0	2	MS2	0.504		0	200	1	40.5439	1	20171101_10.RAW	1350.35
		FALSE	High		Sequest HT (AD2)	Unambiguous	[R].WLLEGELYNGR.[LV]		4	4	pcri_g8720.t1; pcri_g8718.t1; pcri_g8045.t1; pcri_g8716.t1	pcri_g8720.t1; pcri_g8718.t1; pcri_g8045.t1; pcri_g8716.t1	0	2	MS2	0.5305		0	200	1	37.9922	1	20171101_10.RAW	1350.68
		FALSE	High		Sequest HT (AJ2)	Unambiguous	[R].WLLEGELYNGR.[LV]		4	4	pcri_g8720.t1; pcri_g8718.t1; pcri_g8045.t1; pcri_g8716.t1	pcri_g8720.t1; pcri_g8718.t1; pcri_g8045.t1; pcri_g8716.t1	0	2	MS2	0.5213		0	200	1	44.86	1	20171101_04.RAW	1350.62
		FALSE	High		Sequest HT (S2)	Unambiguous	[R].WLLEGELYNGR.[LV]		4	4	pcri_g8720.t1; pcri_g8718.t1; pcri_g8045.t1; pcri_g8716.t1	pcri_g8720.t1; pcri_g8718.t1; pcri_g8045.t1; pcri_g8716.t1	0	2	MS2	0.5559		0	200	1	34.3522	1	20171202_02.RAW	1350.47
		FALSE	High		Sequest HT (AF2)	Unambiguous	[R].WLLEGELYNGR.[LV]		4	4	pcri_g8720.t1; pcri_g8718.t1; pcri_g8045.t1; pcri_g8716.t1	pcri_g8720.t1; pcri_g8718.t1; pcri_g8045.t1; pcri_g8716.t1	0	2	MS2	0.4827		0	200	1	35.0277	1	20171101_08.RAW	1350.71
		FALSE	High		Sequest HT (AL2)	Unambiguous	[R].WLLEGELYNGR.[LV]		4	4	pcri_g8720.t1; pcri_g8718.t1; pcri_g8045.t1; pcri_g8716.t1	pcri_g8720.t1; pcri_g8718.t1; pcri_g8045.t1; pcri_g8716.t1	0	2	MS2	0.4933		0	200	1	49.3603	1	20171101_02.RAW	1350.43
		FALSE	High		Sequest HT (AJ2)	Unambiguous	[R].WLLEGELYNGR.[LV]		4	4	pcri_g8720.t1; pcri_g8718.t1; pcri_g8045.t1; pcri_g8716.t1	pcri_g8720.t1; pcri_g8718.t1; pcri_g8045.t1; pcri_g8716.t1	0	2	MS2	0.52		0	200	1	48.3024	1	20171101_04.RAW	1350.66
		FALSE	High		Sequest HT (S2)	Unambiguous	[R].WLLEGELYNGR.[LV]		4	4	pcri_g8720.t1; pcri_g8718.t1; pcri_g8045.t1; pcri_g8716.t1	pcri_g8720.t1; pcri_g8718.t1; pcri_g8045.t1; pcri_g8716.t1	0	2	MS2	0.5867		0	200	1	31.8761	1	20171202_02.RAW	1349.76
		FALSE	High		Sequest HT (AD2)	Unambiguous	[R].WLLEGELYNGR.[LV]		4	4	pcri_g8720.t1; pcri_g8718.t1; pcri_g8045.t1; pcri_g8716.t1	pcri_g8720.t1; pcri_g8718.t1; pcri_g8045.t1; pcri_g8716.t1	0	2	MS2	0.4773		0	200	1	42.537	1	20171101_10.RAW	1350.56
		FALSE	High		Sequest HT (P2)	Unambiguous	[R].WLLEGELYNGR.[LV]		4	4	pcri_g8720.t1; pcri_g8718.t1; pcri_g8045.t1; pcri_g8716.t1	pcri_g8720.t1; pcri_g8718.t1; pcri_g8045.t1; pcri_g8716.t1	0	2	MS2	0.5228		0	200	1	32.7287	1	20171202_05.RAW	1349.8
		FALSE	High		Sequest HT (AD2)	Unambiguous	[R].WLLEGELYNGR.[LV]		4	4	pcri_g8720.t1; pcri_g8718.t1; pcri_g8045.t1; pcri_g8716.t1	pcri_g8720.t1; pcri_g8718.t1; pcri_g8045.t1; pcri_g8716.t1	0	2	MS2	0.5067		0	200	1	52.9822	1	20171101_10.RAW	1350.57
		FALSE	High		Sequest HT (V2)	Unambiguous	[R].WLLEGELYNGR.[LV]		4	4	pcri_g8720.t1; pcri_g8718.t1; pcri_g8045.t1; pcri_g8716.t1	pcri_g8720.t1; pcri_g8718.t1; pcri_g8045.t1; pcri_g8716.t1	0	2	MS2	0.5469		0	200	1	34.4113	1	20171101_blank08.RAW	1350.27
		FALSE	High		Sequest HT (AD2)	Unambiguous	[R].WLLEGELYNGR.[LV]		4	4	pcri_g8720.t1; pcri_g8718.t1; pcri_g8045.t1; pcri_g8716.t1	pcri_g8720.t1; pcri_g8718.t1; pcri_g8045.t1; pcri_g8716.t1	0	2	MS2	0.5121		0	200	1	46.4383	1	20171101_10.RAW	1350.28
		FALSE	High		Sequest HT (Y2)	Unambiguous	[R].WLLEGELYNGR.[LV]		4	4	pcri_g8720.t1; pcri_g8718.t1; pcri_g8045.t1; pcri_g8716.t1	pcri_g8720.t1; pcri_g8718.t1; pcri_g8045.t1; pcri_g8716.t1	0	2	MS2	0.4826		0	200	1	34.1611	1	20171101_blank05.RAW	1350.48
		FALSE	High		Sequest HT (T2)	Unambiguous	[R].WLLEGELYNGR.[LV]		4	4	pcri_g8720.t1; pcri_g8718.t1; pcri_g8045.t1; pcri_g8716.t1	pcri_g8720.t1; pcri_g8718.t1; pcri_g8045.t1; pcri_g8716.t1	0	2	MS2	0.5469		0	200	1	32.0976	1	20171202_01.RAW	1350.15
		FALSE	High		Sequest HT (AD2)	Unambiguous	[R].WLLEGELYNGR.[LV]		4	4	pcri_g8720.t1; pcri_g8718.t1; pcri_g8045.t1; pcri_g8716.t1	pcri_g8720.t1; pcri_g8718.t1; pcri_g8045.t1; pcri_g8716.t1	0	2	MS2	0.5469		0	200	1	45.2926	1	20171101_10.RAW	1350.55
		FALSE	High		Sequest HT (AJ2)	Unambiguous	[R].WLLEGELYNGR.[LV]		4	4	pcri_g8720.t1; pcri_g8718.t1; pcri_g8045.t1; pcri_g8716.t1	pcri_g8720.t1; pcri_g8718.t1; pcri_g8045.t1; pcri_g8716.t1	0	2	MS2	0.504		0	200	1	48.8502	1	20171101_04.RAW	1349.69
		FALSE	High		Sequest HT (AJ2)	Unambiguous	[R].WLLEGELYNGR.[LV]		4	4	pcri_g8720.t1; pcri_g8718.t1; pcri_g8045.t1; pcri_g8716.t1	pcri_g8720.t1; pcri_g8718.t1; pcri_g8045.t1; pcri_g8716.t1	0	2	MS2	0.4582		0	200	1	39.1736	1	20171101_04.RAW	1350.32
		FALSE	High		Sequest HT (AJ2)	Unambiguous	[R].WLLEGELYNGR.[LV]		4	4	pcri_g8720.t1; pcri_g8718.t1; pcri_g8045.t1; pcri_g8716.t1	pcri_g8720.t1; pcri_g8718.t1; pcri_g8045.t1; pcri_g8716.t1	0	2	MS2	0.566		0	200	1	53.396	1	20171101_04.RAW	1349.69
		FALSE	High		Sequest HT (AD2)	Unambiguous	[R].WLLEGELYNGR.[LV]		4	4	pcri_g8720.t1; pcri_g8718.t1; pcri_g8045.t1; pcri_g8716.t1	pcri_g8720.t1; pcri_g8718.t1; pcri_g8045.t1; pcri_g8716.t1	0	2	MS2	0.5175		0	200	1	52.4108	1	20171101_10.RAW	1350.35
		FALSE	High		Sequest HT (N2)	Unambiguous	[R].WLLEGELYNGR.[LV]		4	4	pcri_g8720.t1; pcri_g8718.t1; pcri_g8045.t1; pcri_g8716.t1	pcri_g8720.t1; pcri_g8718.t1; pcri_g8045.t1; pcri_g8716.t1	0	2	MS2	0.4744		0	200	1	32.6179	1	20171202_07.RAW	1350.44
		FALSE	High		Sequest HT (Q2)	Unambiguous	[R].WLLEGELYNGR.[LV]		4	4	pcri_g8720.t1; pcri_g8718.t1; pcri_g8045.t1; pcri_g8716.t1	pcri_g8720.t1; pcri_g8718.t1; pcri_g8045.t1; pcri_g8716.t1	0	2	MS2	0.4811		0	200	1	37.0128	1	20171202_04.RAW	1349.77
		FALSE	High		Sequest HT (AD2)	Unambiguous	[R].WLLEGELYNGR.[LV]		4	4	pcri_g8720.t1; pcri_g8718.t1; pcri_g8045.t1; pcri_g8716.t1	pcri_g8720.t1; pcri_g8718.t1; pcri_g8045.t1; pcri_g8716.t1	0	2	MS2	0.4905		0	200	1	41.9245	1	20171101_10.RAW	1350.94
		FALSE	High		Sequest HT (AD2)	Unambiguous	[R].WLLEGELYNGR.[LV]		4	4	pcri_g8720.t1; pcri_g8718.t1; pcri_g8045.t1; pcri_g8716.t1	pcri_g8720.t1; pcri_g8718.t1; pcri_g8045.t1; pcri_g8716.t1	0	2	MS2	0.4715		0	200	1	48.1727	1	20171101_10.RAW	1350.57
		FALSE	High		Sequest HT (AM2)	Unambiguous	[R].WLLEGELYNGR.[LV]		4	4	pcri_g8720.t1; pcri_g8718.t1; pcri_g8045.t1; pcri_g8716.t1	pcri_g8720.t1; pcri_g8718.t1; pcri_g8045.t1; pcri_g8716.t1	0	2	MS2	0.4634		0	200	1	35.0446	1	20171101_01.RAW	1351.39
		FALSE	High		Sequest HT (AL2)	Unambiguous	[R].WLLEGELYNGR.[LV]		4	4	pcri_g8720.t1; pcri_g8718.t1; pcri_g8045.t1; pcri_g8716.t1	pcri_g8720.t1; pcri_g8718.t1; pcri_g8045.t1; pcri_g8716.t1	0	2	MS2	0.4661		0	200	1	37.478	1	20171101_02.RAW	1350.77
		FALSE	High		Sequest HT (V2)	Unambiguous	[R].WLLEGELYNGR.[LV]		4	4	pcri_g8720.t1; pcri_g8718.t1; pcri_g8045.t1; pcri_g8716.t1	pcri_g8720.t1; pcri_g8718.t1; pcri_g8045.t1; pcri_g8716.t1	0	2	MS2	0.4824		0	200	1	34.9581	1	20171101_blank08.RAW	1350.99
		FALSE	High		Sequest HT (T2)	Unambiguous	[R].WLLEGELYNGR.[LV]		4	4	pcri_g8720.t1; pcri_g8718.t1; pcri_g8045.t1; pcri_g8716.t1	pcri_g8720.t1; pcri_g8718.t1; pcri_g8045.t1; pcri_g8716.t1	0	2	MS2	0.4864		0	200	1	32.6694	1	20171202_01.RAW	1350.16
		FALSE	High		Sequest HT (AF2)	Unambiguous	[R].WLLEGELYNGR.[LV]		4	4	pcri_g8720.t1; pcri_g8718.t1; pcri_g8045.t1; pcri_g8716.t1	pcri_g8720.t1; pcri_g8718.t1; pcri_g8045.t1; pcri_g8716.t1	0	2	MS2	0.4837		0	200	1	34.4368	1	20171101_08.RAW	1350.22
		FALSE	High		Sequest HT (AI2)	Unambiguous	[R].WLLEGELYNGR.[LV]		4	4	pcri_g8720.t1; pcri_g8718.t1; pcri_g8045.t1; pcri_g8716.t1	pcri_g8720.t1; pcri_g8718.t1; pcri_g8045.t1; pcri_g8716.t1	0	2	MS2	0.4293		0	200	1	49.7834	1	20171101_05.RAW	1350.41
		FALSE	High		Sequest HT (P2)	Unambiguous	[R].WLLEGELYNGR.[LV]		4	4	pcri_g8720.t1; pcri_g8718.t1; pcri_g8045.t1; pcri_g8716.t1	pcri_g8720.t1; pcri_g8718.t1; pcri_g8045.t1; pcri_g8716.t1	0	2	MS2	0.4523		0	200	1	32.2746	1	20171202_05.RAW	1353.3
		FALSE	High		Sequest HT (AJ2)	Unambiguous	[R].WLLEGELYNGR.[LV]		4	4	pcri_g8720.t1; pcri_g8718.t1; pcri_g8045.t1; pcri_g8716.t1	pcri_g8720.t1; pcri_g8718.t1; pcri_g8045.t1; pcri_g8716.t1	0	2	MS2	0.5313		0	200	1	37.0642	1	20171101_04.RAW	1350.38
		FALSE	High		Sequest HT (AJ2)	Unambiguous	[R].WLLEGELYNGR.[LV]		4	4	pcri_g8720.t1; pcri_g8718.t1; pcri_g8045.t1; pcri_g8716.t1	pcri_g8720.t1; pcri_g8718.t1; pcri_g8045.t1; pcri_g8716.t1	0	2	MS2	0.5341		0	200	1	52.8377	1	20171101_04.RAW	1350.32
		FALSE	High		Sequest HT (K2)	Unambiguous	[R].WLLEGELYNGR.[LV]		4	4	pcri_g8720.t1; pcri_g8718.t1; pcri_g8045.t1; pcri_g8716.t1	pcri_g8720.t1; pcri_g8718.t1; pcri_g8045.t1; pcri_g8716.t1	0	2	MS2	0.5273		0	200	1	41.591	1	20171202_10.RAW	1350.69
		FALSE	High		Sequest HT (AI2)	Unambiguous	[R].WLLEGELYNGR.[LV]		4	4	pcri_g8720.t1; pcri_g8718.t1; pcri_g8045.t1; pcri_g8716.t1	pcri_g8720.t1; pcri_g8718.t1; pcri_g8045.t1; pcri_g8716.t1	0	2	MS2	0.5055		0	200	1	50.4684	1	20171101_05.RAW	1351.38
		FALSE	High		Sequest HT (AL2)	Unambiguous	[R].WLLEGELYNGR.[LV]		4	4	pcri_g8720.t1; pcri_g8718.t1; pcri_g8045.t1; pcri_g8716.t1	pcri_g8720.t1; pcri_g8718.t1; pcri_g8045.t1; pcri_g8716.t1	0	2	MS2	0.541		0	200	1	50.6158	1	20171101_02.RAW	1350.33
		FALSE	High		Sequest HT (AG2)	Unambiguous	[R].WLLEGELYNGR.[LV]		4	4	pcri_g8720.t1; pcri_g8718.t1; pcri_g8045.t1; pcri_g8716.t1	pcri_g8720.t1; pcri_g8718.t1; pcri_g8045.t1; pcri_g8716.t1	0	2	MS2	0.4781		0	114.711	1	34.8453	1	20171101_07.RAW	1350.61
		FALSE	High		Sequest HT (AJ2)	Unambiguous	[R].WLLEGELYNGR.[LV]		4	4	pcri_g8720.t1; pcri_g8718.t1; pcri_g8045.t1; pcri_g8716.t1	pcri_g8720.t1; pcri_g8718.t1; pcri_g8045.t1; pcri_g8716.t1	0	2	MS2	0.5644		0	200	1	45.5126	1	20171101_04.RAW	1350.34
		FALSE	High		Sequest HT (Y2)	Unambiguous	[R].WLLEGELYNGR.[LV]		4	4	pcri_g8720.t1; pcri_g8718.t1; pcri_g8045.t1; pcri_g8716.t1	pcri_g8720.t1; pcri_g8718.t1; pcri_g8045.t1; pcri_g8716.t1	0	2	MS2	0.5829		0	200	1	52.1497	1	20171101_blank05.RAW	1350.21
		FALSE	High		Sequest HT (AI2)	Unambiguous	[R].WLLEGELYNGR.[LV]		4	4	pcri_g8720.t1; pcri_g8718.t1; pcri_g8045.t1; pcri_g8716.t1	pcri_g8720.t1; pcri_g8718.t1; pcri_g8045.t1; pcri_g8716.t1	0	2	MS2	0.5319		0	200	1	53.3675	1	20171101_05.RAW	1351.57
		FALSE	High		Sequest HT (AL2)	Unambiguous	[R].WLLEGELYNGR.[LV]		4	4	pcri_g8720.t1; pcri_g8718.t1; pcri_g8045.t1; pcri_g8716.t1	pcri_g8720.t1; pcri_g8718.t1; pcri_g8045.t1; pcri_g8716.t1	0	2	MS2	0.5014		0	200	1	45.7371	1	20171101_02.RAW	1350.51
		FALSE	High		Sequest HT (K2)	Unambiguous	[R].WLLEGELYNGR.[LV]		4	4	pcri_g8720.t1; pcri_g8718.t1; pcri_g8045.t1; pcri_g8716.t1	pcri_g8720.t1; pcri_g8718.t1; pcri_g8045.t1; pcri_g8716.t1	0	2	MS2	0.3482		0	81.273	1	32.272	1	20171202_10.RAW	1353.63
		FALSE	High		Sequest HT (AG2)	Unambiguous	[R].WLLEGELYNGR.[LV]		4	4	pcri_g8720.t1; pcri_g8718.t1; pcri_g8045.t1; pcri_g8716.t1	pcri_g8720.t1; pcri_g8718.t1; pcri_g8045.t1; pcri_g8716.t1	0	2	MS2	0.546		0	200	1	51.1083	1	20171101_07.RAW	1350.59
		FALSE	High		Sequest HT (AG2)	Unambiguous	[R].WLLEGELYNGR.[LV]		4	4	pcri_g8720.t1; pcri_g8718.t1; pcri_g8045.t1; pcri_g8716.t1	pcri_g8720.t1; pcri_g8718.t1; pcri_g8045.t1; pcri_g8716.t1	0	2	MS2	0.4944		0	200	1	59.868	1	20171101_07.RAW	1351
		FALSE	High		Sequest HT (S2)	Unambiguous	[R].WLLEGELYNGR.[LV]		4	4	pcri_g8720.t1; pcri_g8718.t1; pcri_g8045.t1; pcri_g8716.t1	pcri_g8720.t1; pcri_g8718.t1; pcri_g8045.t1; pcri_g8716.t1	0	2	MS2	0.567		0	200	1	33.5843	1	20171202_02.RAW	1350.48
		FALSE	High		Sequest HT (AJ2)	Unambiguous	[R].WLLEGELYNGR.[LV]		4	4	pcri_g8720.t1; pcri_g8718.t1; pcri_g8045.t1; pcri_g8716.t1	pcri_g8720.t1; pcri_g8718.t1; pcri_g8045.t1; pcri_g8716.t1	0	2	MS2	0.5251		0	200	1	52.2161	1	20171101_04.RAW	1350.41
		FALSE	High		Sequest HT (AJ2)	Unambiguous	[R].WLLEGELYNGR.[LV]		4	4	pcri_g8720.t1; pcri_g8718.t1; pcri_g8045.t1; pcri_g8716.t1	pcri_g8720.t1; pcri_g8718.t1; pcri_g8045.t1; pcri_g8716.t1	0	2	MS2	0.5182		0	200	1	55.0383	1	20171101_04.RAW	1350.48
		FALSE	High		Sequest HT (N2)	Unambiguous	[R].WLLEGELYNGR.[LV]		4	4	pcri_g8720.t1; pcri_g8718.t1; pcri_g8045.t1; pcri_g8716.t1	pcri_g8720.t1; pcri_g8718.t1; pcri_g8045.t1; pcri_g8716.t1	0	2	MS2	0.3585		0	200	1	32.0663	1	20171202_07.RAW	1353.46
		FALSE	High		Sequest HT (Y2)	Unambiguous	[R].WLLEGELYNGR.[LV]		4	4	pcri_g8720.t1; pcri_g8718.t1; pcri_g8045.t1; pcri_g8716.t1	pcri_g8720.t1; pcri_g8718.t1; pcri_g8045.t1; pcri_g8716.t1	0	2	MS2	0.4494		0	200	1	49.3232	1	20171101_blank05.RAW	1351.02
		FALSE	High		Sequest HT (AI2)	Unambiguous	[R].WLLEGELYNGR.[LV]		4	4	pcri_g8720.t1; pcri_g8718.t1; pcri_g8045.t1; pcri_g8716.t1	pcri_g8720.t1; pcri_g8718.t1; pcri_g8045.t1; pcri_g8716.t1	0	2	MS2	0.486		0	200	1	46.8873	1	20171101_05.RAW	1351.51
		FALSE	High		Sequest HT (AI2)	Unambiguous	[R].WLLEGELYNGR.[LV]		4	4	pcri_g8720.t1; pcri_g8718.t1; pcri_g8045.t1; pcri_g8716.t1	pcri_g8720.t1; pcri_g8718.t1; pcri_g8045.t1; pcri_g8716.t1	0	2	MS2	0.5424		0	200	1	51.0367	1	20171101_05.RAW	1350.07
		FALSE	High		Sequest HT (AI2)	Unambiguous	[R].WLLEGELYNGR.[LV]		4	4	pcri_g8720.t1; pcri_g8718.t1; pcri_g8045.t1; pcri_g8716.t1	pcri_g8720.t1; pcri_g8718.t1; pcri_g8045.t1; pcri_g8716.t1	0	2	MS2	0.5326		0	200	1	43.897	1	20171101_05.RAW	1350.68
		FALSE	High		Sequest HT (AD2)	Unambiguous	[R].WLLEGELYNGR.[LV]		4	4	pcri_g8720.t1; pcri_g8718.t1; pcri_g8045.t1; pcri_g8716.t1	pcri_g8720.t1; pcri_g8718.t1; pcri_g8045.t1; pcri_g8716.t1	0	2	MS2	0.4972		0	200	1	56.554	1	20171101_10.RAW	1350.49
		FALSE	High		Sequest HT (AI2)	Unambiguous	[R].WLLEGELYNGR.[LV]		4	4	pcri_g8720.t1; pcri_g8718.t1; pcri_g8045.t1; pcri_g8716.t1	pcri_g8720.t1; pcri_g8718.t1; pcri_g8045.t1; pcri_g8716.t1	0	2	MS2	0.49		0	200	1	47.4804	1	20171101_05.RAW	1350.57
		FALSE	High		Sequest HT (Y2)	Unambiguous	[R].WLLEGELYNGR.[LV]		4	4	pcri_g8720.t1; pcri_g8718.t1; pcri_g8045.t1; pcri_g8716.t1	pcri_g8720.t1; pcri_g8718.t1; pcri_g8045.t1; pcri_g8716.t1	0	2	MS2	0.5328		0	200	1	53.6679	1	20171101_blank05.RAW	1351.92
		FALSE	High		Sequest HT (AD2)	Unambiguous	[R].WLLEGELYNGR.[LV]		4	4	pcri_g8720.t1; pcri_g8718.t1; pcri_g8045.t1; pcri_g8716.t1	pcri_g8720.t1; pcri_g8718.t1; pcri_g8045.t1; pcri_g8716.t1	0	2	MS2	0.5086		0	200	1	41.1383	1	20171101_10.RAW	1349.97
		FALSE	High		Sequest HT (AH2)	Unambiguous	[R].WLLEGELYNGR.[LV]		4	4	pcri_g8720.t1; pcri_g8718.t1; pcri_g8045.t1; pcri_g8716.t1	pcri_g8720.t1; pcri_g8718.t1; pcri_g8045.t1; pcri_g8716.t1	0	2	MS2	0.51		0	200	1	34.3568	1	20171101_06.RAW	1350.28
		FALSE	High		Sequest HT (AL2)	Unambiguous	[R].WLLEGELYNGR.[LV]		4	4	pcri_g8720.t1; pcri_g8718.t1; pcri_g8045.t1; pcri_g8716.t1	pcri_g8720.t1; pcri_g8718.t1; pcri_g8045.t1; pcri_g8716.t1	0	2	MS2	0.4613		0	200	1	48.1687	1	20171101_02.RAW	1351.36
		FALSE	High		Sequest HT (AL2)	Unambiguous	[R].WLLEGELYNGR.[LV]		4	4	pcri_g8720.t1; pcri_g8718.t1; pcri_g8045.t1; pcri_g8716.t1	pcri_g8720.t1; pcri_g8718.t1; pcri_g8045.t1; pcri_g8716.t1	0	2	MS2	0.4682		0	200	1	44.252	1	20171101_02.RAW	1350.78
		FALSE	High		Sequest HT (AL2)	Unambiguous	[R].WLLEGELYNGR.[LV]		4	4	pcri_g8720.t1; pcri_g8718.t1; pcri_g8045.t1; pcri_g8716.t1	pcri_g8720.t1; pcri_g8718.t1; pcri_g8045.t1; pcri_g8716.t1	0	2	MS2	0.5159		0	200	1	58.5245	1	20171101_02.RAW	1350.58
		FALSE	High		Sequest HT (T2)	Unambiguous	[R].WLLEGELYNGR.[LV]		4	4	pcri_g8720.t1; pcri_g8718.t1; pcri_g8045.t1; pcri_g8716.t1	pcri_g8720.t1; pcri_g8718.t1; pcri_g8045.t1; pcri_g8716.t1	0	2	MS2	0.3681		0	200	1	32.2705	1	20171202_01.RAW	1353.33
		FALSE	High		Sequest HT (AA2)	Unambiguous	[R].WLLEGELYNGR.[LV]		4	4	pcri_g8720.t1; pcri_g8718.t1; pcri_g8045.t1; pcri_g8716.t1	pcri_g8720.t1; pcri_g8718.t1; pcri_g8045.t1; pcri_g8716.t1	0	2	MS2	0.4315		0	200	1	34.2053	1	20171101_blank03.RAW	1350.63
		FALSE	High		Sequest HT (AI2)	Unambiguous	[R].WLLEGELYNGR.[LV]		4	4	pcri_g8720.t1; pcri_g8718.t1; pcri_g8045.t1; pcri_g8716.t1	pcri_g8720.t1; pcri_g8718.t1; pcri_g8045.t1; pcri_g8716.t1	0	2	MS2	0.5409		0	200	1	37.7874	1	20171101_05.RAW	1350.4
		FALSE	High		Sequest HT (AJ2)	Unambiguous	[R].WLLEGELYNGR.[LV]		4	4	pcri_g8720.t1; pcri_g8718.t1; pcri_g8045.t1; pcri_g8716.t1	pcri_g8720.t1; pcri_g8718.t1; pcri_g8045.t1; pcri_g8716.t1	0	2	MS2	0.5263		0	200	1	38.4521	1	20171101_04.RAW	1350.06
		FALSE	High		Sequest HT (AI2)	Unambiguous	[R].WLLEGELYNGR.[LV]		4	4	pcri_g8720.t1; pcri_g8718.t1; pcri_g8045.t1; pcri_g8716.t1	pcri_g8720.t1; pcri_g8718.t1; pcri_g8045.t1; pcri_g8716.t1	0	2	MS2	0.4897		0	200	1	57.3494	1	20171101_05.RAW	1350.61
		FALSE	High		Sequest HT (AD2)	Unambiguous	[R].WLLEGELYNGR.[LV]		4	4	pcri_g8720.t1; pcri_g8718.t1; pcri_g8045.t1; pcri_g8716.t1	pcri_g8720.t1; pcri_g8718.t1; pcri_g8045.t1; pcri_g8716.t1	0	2	MS2	0.4721		0	200	1	53.5364	1	20171101_10.RAW	1350.55
		FALSE	High		Sequest HT (AL2)	Unambiguous	[R].WLLEGELYNGR.[LV]		4	4	pcri_g8720.t1; pcri_g8718.t1; pcri_g8045.t1; pcri_g8716.t1	pcri_g8720.t1; pcri_g8718.t1; pcri_g8045.t1; pcri_g8716.t1	0	2	MS2	0.5601		0	200	1	46.4586	1	20171101_02.RAW	1350.25
		FALSE	High		Sequest HT (AJ2)	Unambiguous	[R].WLLEGELYNGR.[LV]		4	4	pcri_g8720.t1; pcri_g8718.t1; pcri_g8045.t1; pcri_g8716.t1	pcri_g8720.t1; pcri_g8718.t1; pcri_g8045.t1; pcri_g8716.t1	0	2	MS2	0.5455		0	200	1	35.8544	1	20171101_04.RAW	1349.8
		FALSE	High		Sequest HT (AL2)	Unambiguous	[R].WLLEGELYNGR.[LV]		4	4	pcri_g8720.t1; pcri_g8718.t1; pcri_g8045.t1; pcri_g8716.t1	pcri_g8720.t1; pcri_g8718.t1; pcri_g8045.t1; pcri_g8716.t1	0	2	MS2	0.5634		0	200	1	57.3633	1	20171101_02.RAW	1350.11
		FALSE	High		Sequest HT (AI2)	Unambiguous	[R].WLLEGELYNGR.[LV]		4	4	pcri_g8720.t1; pcri_g8718.t1; pcri_g8045.t1; pcri_g8716.t1	pcri_g8720.t1; pcri_g8718.t1; pcri_g8045.t1; pcri_g8716.t1	0	2	MS2	0.5207		0	200	1	48.6388	1	20171101_05.RAW	1350.28
		FALSE	High		Sequest HT (AL2)	Unambiguous	[R].WLLEGELYNGR.[LV]		4	4	pcri_g8720.t1; pcri_g8718.t1; pcri_g8045.t1; pcri_g8716.t1	pcri_g8720.t1; pcri_g8718.t1; pcri_g8045.t1; pcri_g8716.t1	0	2	MS2	0.5118		0	200	1	59.2775	1	20171101_02.RAW	1350.16
		FALSE	High		Sequest HT (AI2)	Unambiguous	[R].WLLEGELYNGR.[LV]		4	4	pcri_g8720.t1; pcri_g8718.t1; pcri_g8045.t1; pcri_g8716.t1	pcri_g8720.t1; pcri_g8718.t1; pcri_g8045.t1; pcri_g8716.t1	0	2	MS2	0.4645		0	200	1	39.3511	1	20171101_05.RAW	1350.58
		FALSE	High		Sequest HT (AD2)	Unambiguous	[R].WLLEGELYNGR.[LV]		4	4	pcri_g8720.t1; pcri_g8718.t1; pcri_g8045.t1; pcri_g8716.t1	pcri_g8720.t1; pcri_g8718.t1; pcri_g8045.t1; pcri_g8716.t1	0	2	MS2	0.5193		0	200	1	49.8984	1	20171101_10.RAW	1350.22
		FALSE	High		Sequest HT (K2)	Unambiguous	[R].WLLEGELYNGR.[LV]		4	4	pcri_g8720.t1; pcri_g8718.t1; pcri_g8045.t1; pcri_g8716.t1	pcri_g8720.t1; pcri_g8718.t1; pcri_g8045.t1; pcri_g8716.t1	0	2	MS2	0.5519		0	200	1	57.9671	1	20171202_10.RAW	1351.73
		FALSE	High		Sequest HT (X2)	Unambiguous	[R].WLLEGELYNGR.[LV]		4	4	pcri_g8720.t1; pcri_g8718.t1; pcri_g8045.t1; pcri_g8716.t1	pcri_g8720.t1; pcri_g8718.t1; pcri_g8045.t1; pcri_g8716.t1	0	2	MS2	0.4718		0	200	1	34.4587	1	20171101_blank06.RAW	1350.48
		FALSE	High		Sequest HT (AJ2)	Unambiguous	[R].WLLEGELYNGR.[LV]		4	4	pcri_g8720.t1; pcri_g8718.t1; pcri_g8045.t1; pcri_g8716.t1	pcri_g8720.t1; pcri_g8718.t1; pcri_g8045.t1; pcri_g8716.t1	0	2	MS2	0.3798		0	200	1	56.697	1	20171101_04.RAW	1350.77
		FALSE	High		Sequest HT (AL2)	Unambiguous	[R].WLLEGELYNGR.[LV]		4	4	pcri_g8720.t1; pcri_g8718.t1; pcri_g8045.t1; pcri_g8716.t1	pcri_g8720.t1; pcri_g8718.t1; pcri_g8045.t1; pcri_g8716.t1	0	2	MS2	0.5433		0	200	1	51.1841	1	20171101_02.RAW	1350.55
		FALSE	High		Sequest HT (Y2)	Unambiguous	[R].WLLEGELYNGR.[LV]		4	4	pcri_g8720.t1; pcri_g8718.t1; pcri_g8045.t1; pcri_g8716.t1	pcri_g8720.t1; pcri_g8718.t1; pcri_g8045.t1; pcri_g8716.t1	0	2	MS2	0.4388		0	200	1	52.7075	1	20171101_blank05.RAW	1350.52
		FALSE	High		Sequest HT (AI2)	Unambiguous	[R].WLLEGELYNGR.[LV]		4	4	pcri_g8720.t1; pcri_g8718.t1; pcri_g8045.t1; pcri_g8716.t1	pcri_g8720.t1; pcri_g8718.t1; pcri_g8045.t1; pcri_g8716.t1	0	2	MS2	0.503		0	200	1	43.1652	1	20171101_05.RAW	1350.32
		FALSE	High		Sequest HT (AI2)	Unambiguous	[R].WLLEGELYNGR.[LV]		4	4	pcri_g8720.t1; pcri_g8718.t1; pcri_g8045.t1; pcri_g8716.t1	pcri_g8720.t1; pcri_g8718.t1; pcri_g8045.t1; pcri_g8716.t1	0	2	MS2	0.491		0	200	1	55.6527	1	20171101_05.RAW	1350.26
		FALSE	High		Sequest HT (AJ2)	Unambiguous	[R].WLLEGELYNGR.[LV]		4	4	pcri_g8720.t1; pcri_g8718.t1; pcri_g8045.t1; pcri_g8716.t1	pcri_g8720.t1; pcri_g8718.t1; pcri_g8045.t1; pcri_g8716.t1	0	2	MS2	0.4127		0	200	1	56.1474	1	20171101_04.RAW	1351.33
		FALSE	High		Sequest HT (AL2)	Unambiguous	[R].WLLEGELYNGR.[LV]		4	4	pcri_g8720.t1; pcri_g8718.t1; pcri_g8045.t1; pcri_g8716.t1	pcri_g8720.t1; pcri_g8718.t1; pcri_g8045.t1; pcri_g8716.t1	0	2	MS2	0.497		0	200	1	57.9659	1	20171101_02.RAW	1350.24
		FALSE	High		Sequest HT (AL2)	Unambiguous	[R].WLLEGELYNGR.[LV]		4	4	pcri_g8720.t1; pcri_g8718.t1; pcri_g8045.t1; pcri_g8716.t1	pcri_g8720.t1; pcri_g8718.t1; pcri_g8045.t1; pcri_g8716.t1	0	2	MS2	0.4036		0	200	1	48.7211	1	20171101_02.RAW	1351.14
		FALSE	High		Sequest HT (AL2)	Unambiguous	[R].WLLEGELYNGR.[LV]		4	4	pcri_g8720.t1; pcri_g8718.t1; pcri_g8045.t1; pcri_g8716.t1	pcri_g8720.t1; pcri_g8718.t1; pcri_g8045.t1; pcri_g8716.t1	0	2	MS2	0.4048		0	200	1	52.4687	1	20171101_02.RAW	1350.69
		FALSE	High		Sequest HT (AJ2)	Unambiguous	[R].WLLEGELYNGR.[LV]		4	4	pcri_g8720.t1; pcri_g8718.t1; pcri_g8045.t1; pcri_g8716.t1	pcri_g8720.t1; pcri_g8718.t1; pcri_g8045.t1; pcri_g8716.t1	0	2	MS2	0.4894		0	200	1	54.4902	1	20171101_04.RAW	1350.48
		FALSE	High		Sequest HT (AF2)	Unambiguous	[R].WLLEGELYNGR.[LV]		4	4	pcri_g8720.t1; pcri_g8718.t1; pcri_g8045.t1; pcri_g8716.t1	pcri_g8720.t1; pcri_g8718.t1; pcri_g8045.t1; pcri_g8716.t1	0	2	MS2	0.4772		0	200	1	59.0513	1	20171101_08.RAW	1351.42
		FALSE	High		Sequest HT (AL2)	Unambiguous	[R].WLLEGELYNGR.[LV]		4	4	pcri_g8720.t1; pcri_g8718.t1; pcri_g8045.t1; pcri_g8716.t1	pcri_g8720.t1; pcri_g8718.t1; pcri_g8045.t1; pcri_g8716.t1	0	2	MS2	0.5106		0	200	1	44.9587	1	20171101_02.RAW	1350
		FALSE	High		Sequest HT (AI2)	Unambiguous	[R].WLLEGELYNGR.[LV]		4	4	pcri_g8720.t1; pcri_g8718.t1; pcri_g8045.t1; pcri_g8716.t1	pcri_g8720.t1; pcri_g8718.t1; pcri_g8045.t1; pcri_g8716.t1	0	2	MS2	0.5653		0	200	1	48.076	1	20171101_05.RAW	1349.86
		FALSE	High		Sequest HT (AI2)	Unambiguous	[R].WLLEGELYNGR.[LV]		4	4	pcri_g8720.t1; pcri_g8718.t1; pcri_g8045.t1; pcri_g8716.t1	pcri_g8720.t1; pcri_g8718.t1; pcri_g8045.t1; pcri_g8716.t1	0	2	MS2	0.5745		0	200	1	51.5892	1	20171101_05.RAW	1349.92
		FALSE	High		Sequest HT (AF2)	Unambiguous	[R].WLLEGELYNGR.[LV]		4	4	pcri_g8720.t1; pcri_g8718.t1; pcri_g8045.t1; pcri_g8716.t1	pcri_g8720.t1; pcri_g8718.t1; pcri_g8045.t1; pcri_g8716.t1	0	2	MS2	0.465		0	200	1	57.5083	1	20171101_08.RAW	1349.92
		FALSE	High		Sequest HT (Y2)	Unambiguous	[R].WLLEGELYNGR.[LV]		4	4	pcri_g8720.t1; pcri_g8718.t1; pcri_g8045.t1; pcri_g8716.t1	pcri_g8720.t1; pcri_g8718.t1; pcri_g8045.t1; pcri_g8716.t1	0	2	MS2	0.5732		0	200	1	42.7013	1	20171101_blank05.RAW	1350.76
		FALSE	High		Sequest HT (AM2)	Unambiguous	[R].WLLEGELYNGR.[LV]		4	4	pcri_g8720.t1; pcri_g8718.t1; pcri_g8045.t1; pcri_g8716.t1	pcri_g8720.t1; pcri_g8718.t1; pcri_g8045.t1; pcri_g8716.t1	0	2	MS2	0.5549		0	200	1	52.3152	1	20171101_01.RAW	1350.48
		FALSE	High		Sequest HT (AJ2)	Unambiguous	[R].WLLEGELYNGR.[LV]		4	4	pcri_g8720.t1; pcri_g8718.t1; pcri_g8045.t1; pcri_g8716.t1	pcri_g8720.t1; pcri_g8718.t1; pcri_g8045.t1; pcri_g8716.t1	0	2	MS2	0.5535		0	200	1	42.899	1	20171101_04.RAW	1349.87
		FALSE	High		Sequest HT (AF2)	Unambiguous	[R].WLLEGELYNGR.[LV]		4	4	pcri_g8720.t1; pcri_g8718.t1; pcri_g8045.t1; pcri_g8716.t1	pcri_g8720.t1; pcri_g8718.t1; pcri_g8045.t1; pcri_g8716.t1	0	2	MS2	0.4202		0	200	1	56.851	1	20171101_08.RAW	1352.11
		FALSE	High		Sequest HT (AI2)	Unambiguous	[R].WLLEGELYNGR.[LV]		4	4	pcri_g8720.t1; pcri_g8718.t1; pcri_g8045.t1; pcri_g8716.t1	pcri_g8720.t1; pcri_g8718.t1; pcri_g8045.t1; pcri_g8716.t1	0	2	MS2	0.3098		0	200	1	34.1509	1	20171101_05.RAW	1353.62
		FALSE	High		Sequest HT (AB2)	Unambiguous	[R].WLLEGELYNGR.[LV]		4	4	pcri_g8720.t1; pcri_g8718.t1; pcri_g8045.t1; pcri_g8716.t1	pcri_g8720.t1; pcri_g8718.t1; pcri_g8045.t1; pcri_g8716.t1	0	2	MS2	0.5463		0	200	1	34.5186	1	20171101_blank02.RAW	1349.72
		FALSE	High		Sequest HT (AI2)	Unambiguous	[R].WLLEGELYNGR.[LV]		4	4	pcri_g8720.t1; pcri_g8718.t1; pcri_g8045.t1; pcri_g8716.t1	pcri_g8720.t1; pcri_g8718.t1; pcri_g8045.t1; pcri_g8716.t1	0	2	MS2	0.5216		0	200	1	59.1672	1	20171101_05.RAW	1350.49
		FALSE	High		Sequest HT (AI2)	Unambiguous	[R].WLLEGELYNGR.[LV]		4	4	pcri_g8720.t1; pcri_g8718.t1; pcri_g8045.t1; pcri_g8716.t1	pcri_g8720.t1; pcri_g8718.t1; pcri_g8045.t1; pcri_g8716.t1	0	2	MS2	0.534		0	200	1	34.0752	1	20171101_05.RAW	1349.53
		FALSE	High		Sequest HT (Y2)	Unambiguous	[R].WLLEGELYNGR.[LV]		4	4	pcri_g8720.t1; pcri_g8718.t1; pcri_g8045.t1; pcri_g8716.t1	pcri_g8720.t1; pcri_g8718.t1; pcri_g8045.t1; pcri_g8716.t1	0	2	MS2	0.5108		0	200	1	35.3204	1	20171101_blank05.RAW	1350.78
		FALSE	High		Sequest HT (AD2)	Unambiguous	[R].WLLEGELYNGR.[LV]		4	4	pcri_g8720.t1; pcri_g8718.t1; pcri_g8045.t1; pcri_g8716.t1	pcri_g8720.t1; pcri_g8718.t1; pcri_g8045.t1; pcri_g8716.t1	0	2	MS2	0.5759		0	200	1	57.1068	1	20171101_10.RAW	1349.59
		FALSE	High		Sequest HT (AI2)	Unambiguous	[R].WLLEGELYNGR.[LV]		4	4	pcri_g8720.t1; pcri_g8718.t1; pcri_g8045.t1; pcri_g8716.t1	pcri_g8720.t1; pcri_g8718.t1; pcri_g8045.t1; pcri_g8716.t1	0	2	MS2	0.4534		0	200	1	52.2228	1	20171101_05.RAW	1350.82
		FALSE	High		Sequest HT (AI2)	Unambiguous	[R].WLLEGELYNGR.[LV]		4	4	pcri_g8720.t1; pcri_g8718.t1; pcri_g8045.t1; pcri_g8716.t1	pcri_g8720.t1; pcri_g8718.t1; pcri_g8045.t1; pcri_g8716.t1	0	2	MS2	0.5248		0	200	1	53.9521	1	20171101_05.RAW	1349.43
		FALSE	High		Sequest HT (V2)	Unambiguous	[R].WLLEGELYNGR.[LV]		4	4	pcri_g8720.t1; pcri_g8718.t1; pcri_g8045.t1; pcri_g8716.t1	pcri_g8720.t1; pcri_g8718.t1; pcri_g8045.t1; pcri_g8716.t1	0	2	MS2	0.4611		0	200	1	50.6745	1	20171101_blank08.RAW	1350.36
		FALSE	High		Sequest HT (AL2)	Unambiguous	[R].WLLEGELYNGR.[LV]		4	4	pcri_g8720.t1; pcri_g8718.t1; pcri_g8045.t1; pcri_g8716.t1	pcri_g8720.t1; pcri_g8718.t1; pcri_g8045.t1; pcri_g8716.t1	0	2	MS2	0.5358		0	200	1	53.1406	1	20171101_02.RAW	1349.76
		FALSE	High		Sequest HT (AJ2)	Unambiguous	[R].WLLEGELYNGR.[LV]		4	4	pcri_g8720.t1; pcri_g8718.t1; pcri_g8045.t1; pcri_g8716.t1	pcri_g8720.t1; pcri_g8718.t1; pcri_g8045.t1; pcri_g8716.t1	0	2	MS2	0.4151		0	200	1	50.5172	1	20171101_04.RAW	1352.42
		FALSE	High		Sequest HT (Y2)	Unambiguous	[R].WLLEGELYNGR.[LV]		4	4	pcri_g8720.t1; pcri_g8718.t1; pcri_g8045.t1; pcri_g8716.t1	pcri_g8720.t1; pcri_g8718.t1; pcri_g8045.t1; pcri_g8716.t1	0	2	MS2	0.5047		0	200	1	55.1593	1	20171101_blank05.RAW	1350.52
		FALSE	High		Sequest HT (AL2)	Unambiguous	[R].WLLEGELYNGR.[LV]		4	4	pcri_g8720.t1; pcri_g8718.t1; pcri_g8045.t1; pcri_g8716.t1	pcri_g8720.t1; pcri_g8718.t1; pcri_g8045.t1; pcri_g8716.t1	0	2	MS2	0.5047		0	200	1	40.2524	1	20171101_02.RAW	1350.37
		FALSE	High		Sequest HT (AI2)	Unambiguous	[R].WLLEGELYNGR.[LV]		4	4	pcri_g8720.t1; pcri_g8718.t1; pcri_g8045.t1; pcri_g8716.t1	pcri_g8720.t1; pcri_g8718.t1; pcri_g8045.t1; pcri_g8716.t1	0	2	MS2	0.3956		0	200	1	54.5442	1	20171101_05.RAW	1351.32
		FALSE	High		Sequest HT (Y2)	Unambiguous	[R].WLLEGELYNGR.[LV]		4	4	pcri_g8720.t1; pcri_g8718.t1; pcri_g8045.t1; pcri_g8716.t1	pcri_g8720.t1; pcri_g8718.t1; pcri_g8045.t1; pcri_g8716.t1	0	2	MS2	0.519		0	200	1	51.4542	1	20171101_blank05.RAW	1350.31
		FALSE	High		Sequest HT (AI2)	Unambiguous	[R].WLLEGELYNGR.[LV]		4	4	pcri_g8720.t1; pcri_g8718.t1; pcri_g8045.t1; pcri_g8716.t1	pcri_g8720.t1; pcri_g8718.t1; pcri_g8045.t1; pcri_g8716.t1	0	2	MS2	0.5079		0	200	1	56.798	1	20171101_05.RAW	1349.86
		FALSE	High		Sequest HT (AM2)	Unambiguous	[R].WLLEGELYNGR.[LV]		4	4	pcri_g8720.t1; pcri_g8718.t1; pcri_g8045.t1; pcri_g8716.t1	pcri_g8720.t1; pcri_g8718.t1; pcri_g8045.t1; pcri_g8716.t1	0	2	MS2	0.465		0	200	1	59.3879	1	20171101_01.RAW	1350.77
		FALSE	High		Sequest HT (AI2)	Unambiguous	[R].WLLEGELYNGR.[LV]		4	4	pcri_g8720.t1; pcri_g8718.t1; pcri_g8045.t1; pcri_g8716.t1	pcri_g8720.t1; pcri_g8718.t1; pcri_g8045.t1; pcri_g8716.t1	0	2	MS2	0.5911		0	200	1	40.9799	1	20171101_05.RAW	1350.08
		FALSE	High		Sequest HT (AI2)	Unambiguous	[R].WLLEGELYNGR.[LV]		4	4	pcri_g8720.t1; pcri_g8718.t1; pcri_g8045.t1; pcri_g8716.t1	pcri_g8720.t1; pcri_g8718.t1; pcri_g8045.t1; pcri_g8716.t1	0	2	MS2	0.4231		0	200	1	49.2368	1	20171101_05.RAW	1349.96
		FALSE	High		Sequest HT (AL2)	Unambiguous	[R].WLLEGELYNGR.[LV]		4	4	pcri_g8720.t1; pcri_g8718.t1; pcri_g8045.t1; pcri_g8716.t1	pcri_g8720.t1; pcri_g8718.t1; pcri_g8045.t1; pcri_g8716.t1	0	2	MS2	0.4968		0	200	1	53.7656	1	20171101_02.RAW	1350.27
		FALSE	High		Sequest HT (M2)	Unambiguous	[R].WLLEGELYNGR.[LV]		4	4	pcri_g8720.t1; pcri_g8718.t1; pcri_g8045.t1; pcri_g8716.t1	pcri_g8720.t1; pcri_g8718.t1; pcri_g8045.t1; pcri_g8716.t1	0	2	MS2	0.4194		0	200	1	32.8844	1	20171202_08.RAW	1351.26
		FALSE	High		Sequest HT (AF2)	Unambiguous	[R].WLLEGELYNGR.[LV]		4	4	pcri_g8720.t1; pcri_g8718.t1; pcri_g8045.t1; pcri_g8716.t1	pcri_g8720.t1; pcri_g8718.t1; pcri_g8045.t1; pcri_g8716.t1	0	2	MS2	0.3871		0	200	1	50.9513	1	20171101_08.RAW	1351.45
		FALSE	High		Sequest HT (AI2)	Unambiguous	[R].WLLEGELYNGR.[LV]		4	4	pcri_g8720.t1; pcri_g8718.t1; pcri_g8045.t1; pcri_g8716.t1	pcri_g8720.t1; pcri_g8718.t1; pcri_g8045.t1; pcri_g8716.t1	0	2	MS2	0.5097		0	200	1	40.2575	1	20171101_05.RAW	1349.66
		FALSE	High		Sequest HT (P2)	Unambiguous	[R].WLLEGELYNGR.[LV]		4	4	pcri_g8720.t1; pcri_g8718.t1; pcri_g8045.t1; pcri_g8716.t1	pcri_g8720.t1; pcri_g8718.t1; pcri_g8045.t1; pcri_g8716.t1	0	2	MS2	0.3824		0	200	1	62.805	1	20171202_05.RAW	1351.35
		FALSE	High		Sequest HT (AF2)	Unambiguous	[R].WLLEGELYNGR.[LV]		4	4	pcri_g8720.t1; pcri_g8718.t1; pcri_g8045.t1; pcri_g8716.t1	pcri_g8720.t1; pcri_g8718.t1; pcri_g8045.t1; pcri_g8716.t1	0	2	MS2	0.5784		0	200	1	58.451	1	20171101_08.RAW	1350.35
		FALSE	High		Sequest HT (Y2)	Unambiguous	[R].WLLEGELYNGR.[LV]		4	4	pcri_g8720.t1; pcri_g8718.t1; pcri_g8045.t1; pcri_g8716.t1	pcri_g8720.t1; pcri_g8718.t1; pcri_g8045.t1; pcri_g8716.t1	0	2	MS2	0.5344		0	200	1	47.3823	1	20171101_blank05.RAW	1350.63
		FALSE	High		Sequest HT (AL2)	Unambiguous	[R].WLLEGELYNGR.[LV]		4	4	pcri_g8720.t1; pcri_g8718.t1; pcri_g8045.t1; pcri_g8716.t1	pcri_g8720.t1; pcri_g8718.t1; pcri_g8045.t1; pcri_g8716.t1	0	2	MS2	0.5428		0	200	1	50.0598	1	20171101_02.RAW	1350.49
		FALSE	High		Sequest HT (Y2)	Unambiguous	[R].WLLEGELYNGR.[LV]		4	4	pcri_g8720.t1; pcri_g8718.t1; pcri_g8045.t1; pcri_g8716.t1	pcri_g8720.t1; pcri_g8718.t1; pcri_g8045.t1; pcri_g8716.t1	0	2	MS2	0.5083		0	200	1	48.5916	1	20171101_blank05.RAW	1350.82
		FALSE	High		Sequest HT (AL2)	Unambiguous	[R].WLLEGELYNGR.[LV]		4	4	pcri_g8720.t1; pcri_g8718.t1; pcri_g8045.t1; pcri_g8716.t1	pcri_g8720.t1; pcri_g8718.t1; pcri_g8045.t1; pcri_g8716.t1	0	2	MS2	0.2591		0	200	1	34.1329	1	20171101_02.RAW	1353.53
		FALSE	High		Sequest HT (P2)	Unambiguous	[R].WLLEGELYNGR.[LV]		4	4	pcri_g8720.t1; pcri_g8718.t1; pcri_g8045.t1; pcri_g8716.t1	pcri_g8720.t1; pcri_g8718.t1; pcri_g8045.t1; pcri_g8716.t1	0	2	MS2	0.3654		0	200	1	53.2628	1	20171202_05.RAW	1350.62
		FALSE	High		Sequest HT (Y2)	Unambiguous	[R].WLLEGELYNGR.[LV]		4	4	pcri_g8720.t1; pcri_g8718.t1; pcri_g8045.t1; pcri_g8716.t1	pcri_g8720.t1; pcri_g8718.t1; pcri_g8045.t1; pcri_g8716.t1	0	2	MS2	0.5724		0	200	1	50.5789	1	20171101_blank05.RAW	1350.26
		FALSE	High		Sequest HT (Q2)	Unambiguous	[R].WLLEGELYNGR.[LV]		4	4	pcri_g8720.t1; pcri_g8718.t1; pcri_g8045.t1; pcri_g8716.t1	pcri_g8720.t1; pcri_g8718.t1; pcri_g8045.t1; pcri_g8716.t1	0	1	MS2	0.4358		0	197.826	1	32.2713	1	20171202_04.RAW	1350.78
		FALSE	High		Sequest HT (AK2)	Unambiguous	[R].WLLEGELYNGR.[LV]		4	4	pcri_g8720.t1; pcri_g8718.t1; pcri_g8045.t1; pcri_g8716.t1	pcri_g8720.t1; pcri_g8718.t1; pcri_g8045.t1; pcri_g8716.t1	0	2	MS2	0.4628		0	200	1	49.6388	1	20171101_03.RAW	1350.8
		FALSE	High		Sequest HT (AF2)	Unambiguous	[R].WLLEGELYNGR.[LV]		4	4	pcri_g8720.t1; pcri_g8718.t1; pcri_g8045.t1; pcri_g8716.t1	pcri_g8720.t1; pcri_g8718.t1; pcri_g8045.t1; pcri_g8716.t1	0	2	MS2	0.522		0	200	1	44.4962	1	20171101_08.RAW	1351.07
		FALSE	High		Sequest HT (Y2)	Unambiguous	[R].WLLEGELYNGR.[LV]		4	4	pcri_g8720.t1; pcri_g8718.t1; pcri_g8045.t1; pcri_g8716.t1	pcri_g8720.t1; pcri_g8718.t1; pcri_g8045.t1; pcri_g8716.t1	0	2	MS2	0.5612		0	200	1	42.053	1	20171101_blank05.RAW	1350.23
		FALSE	High		Sequest HT (P2)	Unambiguous	[R].WLLEGELYNGR.[LV]		4	4	pcri_g8720.t1; pcri_g8718.t1; pcri_g8045.t1; pcri_g8716.t1	pcri_g8720.t1; pcri_g8718.t1; pcri_g8045.t1; pcri_g8716.t1	0	2	MS2	0.4642		0	200	1	52.328	1	20171202_05.RAW	1349.67
		FALSE	High		Sequest HT (P2)	Unambiguous	[R].WLLEGELYNGR.[LV]		4	4	pcri_g8720.t1; pcri_g8718.t1; pcri_g8045.t1; pcri_g8716.t1	pcri_g8720.t1; pcri_g8718.t1; pcri_g8045.t1; pcri_g8716.t1	0	2	MS2	0.476		0	200	1	60.6425	1	20171202_05.RAW	1350.01
		FALSE	High		Sequest HT (AF2)	Unambiguous	[R].WLLEGELYNGR.[LV]		4	4	pcri_g8720.t1; pcri_g8718.t1; pcri_g8045.t1; pcri_g8716.t1	pcri_g8720.t1; pcri_g8718.t1; pcri_g8045.t1; pcri_g8716.t1	0	2	MS2	0.3655		0	200	1	53.8794	1	20171101_08.RAW	1351.77
		FALSE	High		Sequest HT (Y2)	Unambiguous	[R].WLLEGELYNGR.[LV]		4	4	pcri_g8720.t1; pcri_g8718.t1; pcri_g8045.t1; pcri_g8716.t1	pcri_g8720.t1; pcri_g8718.t1; pcri_g8045.t1; pcri_g8716.t1	0	2	MS2	0.4637		0	200	1	49.9783	1	20171101_blank05.RAW	1350.71
		FALSE	High		Sequest HT (AF2)	Unambiguous	[R].WLLEGELYNGR.[LV]		4	4	pcri_g8720.t1; pcri_g8718.t1; pcri_g8045.t1; pcri_g8716.t1	pcri_g8720.t1; pcri_g8718.t1; pcri_g8045.t1; pcri_g8716.t1	0	2	MS2	0.4301		0	200	1	49.9231	1	20171101_08.RAW	1350.58
		FALSE	High		Sequest HT (AF2)	Unambiguous	[R].WLLEGELYNGR.[LV]		4	4	pcri_g8720.t1; pcri_g8718.t1; pcri_g8045.t1; pcri_g8716.t1	pcri_g8720.t1; pcri_g8718.t1; pcri_g8045.t1; pcri_g8716.t1	0	2	MS2	0.3776		0	200	1	36.9338	1	20171101_08.RAW	1350.92
		FALSE	High		Sequest HT (V2)	Unambiguous	[R].WLLEGELYNGR.[LV]		4	4	pcri_g8720.t1; pcri_g8718.t1; pcri_g8045.t1; pcri_g8716.t1	pcri_g8720.t1; pcri_g8718.t1; pcri_g8045.t1; pcri_g8716.t1	0	2	MS2	0.4947		0	200	1	55.3139	1	20171101_blank08.RAW	1350.57
		FALSE	High		Sequest HT (K2)	Unambiguous	[R].WLLEGELYNGR.[LV]		4	4	pcri_g8720.t1; pcri_g8718.t1; pcri_g8045.t1; pcri_g8716.t1	pcri_g8720.t1; pcri_g8718.t1; pcri_g8045.t1; pcri_g8716.t1	0	1	MS2	0.4498		0	200	1	32.3667	1	20171202_10.RAW	1350.76
		FALSE	High		Sequest HT (V2)	Unambiguous	[R].WLLEGELYNGR.[LV]		4	4	pcri_g8720.t1; pcri_g8718.t1; pcri_g8045.t1; pcri_g8716.t1	pcri_g8720.t1; pcri_g8718.t1; pcri_g8045.t1; pcri_g8716.t1	0	2	MS2	0.4275		0	200	1	52.7753	1	20171101_blank08.RAW	1350.2
		FALSE	High		Sequest HT (Z2)	Unambiguous	[R].WLLEGELYNGR.[LV]		4	4	pcri_g8720.t1; pcri_g8718.t1; pcri_g8045.t1; pcri_g8716.t1	pcri_g8720.t1; pcri_g8718.t1; pcri_g8045.t1; pcri_g8716.t1	0	2	MS2	0.4627		0	200	1	34.5668	1	20171101_blank04.RAW	1350.7
		FALSE	High		Sequest HT (AJ2)	Unambiguous	[R].WLLEGELYNGR.[LV]		4	4	pcri_g8720.t1; pcri_g8718.t1; pcri_g8045.t1; pcri_g8716.t1	pcri_g8720.t1; pcri_g8718.t1; pcri_g8045.t1; pcri_g8716.t1	0	1	MS2	0.38		0	200	1	34.284	1	20171101_04.RAW	1350.87
		FALSE	High		Sequest HT (V2)	Unambiguous	[R].WLLEGELYNGR.[LV]		4	4	pcri_g8720.t1; pcri_g8718.t1; pcri_g8045.t1; pcri_g8716.t1	pcri_g8720.t1; pcri_g8718.t1; pcri_g8045.t1; pcri_g8716.t1	0	2	MS2	0.3976		0	200	1	48.8721	1	20171101_blank08.RAW	1349.95
		FALSE	High		Sequest HT (AA2)	Unambiguous	[R].WLLEGELYNGR.[LV]		4	4	pcri_g8720.t1; pcri_g8718.t1; pcri_g8045.t1; pcri_g8716.t1	pcri_g8720.t1; pcri_g8718.t1; pcri_g8045.t1; pcri_g8716.t1	0	2	MS2	0.4573		0	200	1	55.4043	1	20171101_blank03.RAW	1349.8
		FALSE	High		Sequest HT (AF2)	Unambiguous	[R].WLLEGELYNGR.[LV]		4	4	pcri_g8720.t1; pcri_g8718.t1; pcri_g8045.t1; pcri_g8716.t1	pcri_g8720.t1; pcri_g8718.t1; pcri_g8045.t1; pcri_g8716.t1	0	1	MS2	0.2547		0	200	1	34.5662	1	20171101_08.RAW	1350.75
	FALSE	High	[R].VAMLAVVGVLTVEAQGK.[G]				2	2	30	pcri_g8718.t1; pcri_g8716.t1	pcri_g8718.t1 pcri_g8716.t1	pcri_g8718.t1 [130-146]; pcri_g8716.t1 [130-146]	0	1684.97	Not Found	Not Found	Not Found	Not Found	Not Found	Not Found	Not Found	High	Not Found	Not Found	Not Found	Not Found	Not Found	Not Found	Not Found	Not Found	Not Found	High	Not Found	Not Found	Not Found	High	5.78	R.VAMLAVVGVLTVEAQGK.G	[130-146]
		Checked	Confidence		Identifying Node	PSM Ambiguity	Annotated Sequence	Modifications	# Protein Groups	# Proteins	Master Protein Accessions	Protein Accessions	# Missed Cleavages	Charge	MS Order	DeltaScore	Isolation Interference [%]	DeltaCn	Ion Inject Time [ms]	Rank	RT [min]	Search Engine Rank	Spectrum File	MH+ [Da]
		FALSE	High		Sequest HT (Y2)	Unambiguous	[R].VAMLAVVGVLTVEAQGK.[G]		2	2	pcri_g8718.t1; pcri_g8716.t1	pcri_g8718.t1; pcri_g8716.t1	0	3	MS2	0.4792		0	200	1	39.7721	1	20171101_blank05.RAW	1689.62
		FALSE	High		Sequest HT (AJ2)	Unambiguous	[R].VAMLAVVGVLTVEAQGK.[G]		2	2	pcri_g8718.t1; pcri_g8716.t1	pcri_g8718.t1; pcri_g8716.t1	0	3	MS2	0.5775		0	200	1	41.7605	1	20171101_04.RAW	1688.61
		FALSE	High		Sequest HT (AE2)	Unambiguous	[R].VAMLAVVGVLTVEAQGK.[G]		2	2	pcri_g8718.t1; pcri_g8716.t1	pcri_g8718.t1; pcri_g8716.t1	0	3	MS2	0.5422		0	200	1	39.6801	1	20171101_09.RAW	1687.31
		FALSE	High		Sequest HT (P2)	Unambiguous	[R].VAMLAVVGVLTVEAQGK.[G]		2	2	pcri_g8718.t1; pcri_g8716.t1	pcri_g8718.t1; pcri_g8716.t1	0	2	MS2	0.5605		0	200	1	39.0344	1	20171202_05.RAW	1687.37
		FALSE	High		Sequest HT (AG2)	Unambiguous	[R].VAMLAVVGVLTVEAQGK.[G]		2	2	pcri_g8718.t1; pcri_g8716.t1	pcri_g8718.t1; pcri_g8716.t1	0	2	MS2	0.552		0	200	1	39.6255	1	20171101_07.RAW	1688.34
		FALSE	High		Sequest HT (Q2)	Unambiguous	[R].VAMLAVVGVLTVEAQGK.[G]		2	2	pcri_g8718.t1; pcri_g8716.t1	pcri_g8718.t1; pcri_g8716.t1	0	2	MS2	0.4716		0	200	1	38.7192	1	20171202_04.RAW	1686.48
		FALSE	High		Sequest HT (Y2)	Unambiguous	[R].VAMLAVVGVLTVEAQGK.[G]		2	2	pcri_g8718.t1; pcri_g8716.t1	pcri_g8718.t1; pcri_g8716.t1	0	2	MS2	0.588		0	200	1	39.5768	1	20171101_blank05.RAW	1685.5
		FALSE	High		Sequest HT (AD2)	Unambiguous	[R].VAMLAVVGVLTVEAQGK.[G]		2	2	pcri_g8718.t1; pcri_g8716.t1	pcri_g8718.t1; pcri_g8716.t1	0	2	MS2	0.5282		0	200	1	39.5808	1	20171101_10.RAW	1688.75
		FALSE	High		Sequest HT (K2)	Unambiguous	[R].VAMLAVVGVLTVEAQGK.[G]		2	2	pcri_g8718.t1; pcri_g8716.t1	pcri_g8718.t1; pcri_g8716.t1	0	2	MS2	0.4447		0	200	1	38.5513	1	20171202_10.RAW	1686.65
		FALSE	High		Sequest HT (AJ2)	Unambiguous	[R].VAMLAVVGVLTVEAQGK.[G]		2	2	pcri_g8718.t1; pcri_g8716.t1	pcri_g8718.t1; pcri_g8716.t1	0	2	MS2	0.6043		0	200	1	39.5067	1	20171101_04.RAW	1685.52
		FALSE	High		Sequest HT (AD2)	Unambiguous	[R].VAMLAVVGVLTVEAQGK.[G]		2	2	pcri_g8718.t1; pcri_g8716.t1	pcri_g8718.t1; pcri_g8716.t1	0	2	MS2	0.6014		0	200	1	39.5265	1	20171101_10.RAW	1685.53
		FALSE	High		Sequest HT (Q2)	Unambiguous	[R].VAMLAVVGVLTVEAQGK.[G]		2	2	pcri_g8718.t1; pcri_g8716.t1	pcri_g8718.t1; pcri_g8716.t1	0	2	MS2	0.5096		0	200	1	41.1076	1	20171202_04.RAW	1686.38
		FALSE	High		Sequest HT (AJ2)	Unambiguous	[R].VAMLAVVGVLTVEAQGK.[G]		2	2	pcri_g8718.t1; pcri_g8716.t1	pcri_g8718.t1; pcri_g8716.t1	0	2	MS2	0.5962		0	200	1	40.057	1	20171101_04.RAW	1686.71
		FALSE	High		Sequest HT (Y2)	Unambiguous	[R].VAMLAVVGVLTVEAQGK.[G]		2	2	pcri_g8718.t1; pcri_g8716.t1	pcri_g8718.t1; pcri_g8716.t1	0	3	MS2	0.6102		0	200	1	39.6963	1	20171101_blank05.RAW	1684.99
		FALSE	High		Sequest HT (K2)	Unambiguous	[R].VAMLAVVGVLTVEAQGK.[G]		2	2	pcri_g8718.t1; pcri_g8716.t1	pcri_g8718.t1; pcri_g8716.t1	0	2	MS2	0.569		0	200	1	39.1055	1	20171202_10.RAW	1685.54
		FALSE	High		Sequest HT (M2)	Unambiguous	[R].VAMLAVVGVLTVEAQGK.[G]		2	2	pcri_g8718.t1; pcri_g8716.t1	pcri_g8718.t1; pcri_g8716.t1	0	3	MS2	0.545		0	200	1	38.9412	1	20171202_08.RAW	1686.58
		FALSE	High		Sequest HT (V2)	Unambiguous	[R].VAMLAVVGVLTVEAQGK.[G]		2	2	pcri_g8718.t1; pcri_g8716.t1	pcri_g8718.t1; pcri_g8716.t1	0	2	MS2	0.576		0	200	1	39.7627	1	20171101_blank08.RAW	1685.71
		FALSE	High		Sequest HT (AI2)	Unambiguous	[R].VAMLAVVGVLTVEAQGK.[G]		2	2	pcri_g8718.t1; pcri_g8716.t1	pcri_g8718.t1; pcri_g8716.t1	0	2	MS2	0.5775		0	200	1	39.4582	1	20171101_05.RAW	1685.81
		FALSE	High		Sequest HT (AJ2)	Unambiguous	[R].VAMLAVVGVLTVEAQGK.[G]		2	2	pcri_g8718.t1; pcri_g8716.t1	pcri_g8718.t1; pcri_g8716.t1	0	3	MS2	0.5539		0	200	1	56.7184	1	20171101_04.RAW	1686.09
		FALSE	High		Sequest HT (AG2)	Unambiguous	[R].VAMLAVVGVLTVEAQGK.[G]		2	2	pcri_g8718.t1; pcri_g8716.t1	pcri_g8718.t1; pcri_g8716.t1	0	2	MS2	0.6193		0	200	1	39.5388	1	20171101_07.RAW	1685.28
		FALSE	High		Sequest HT (AF2)	Unambiguous	[R].VAMLAVVGVLTVEAQGK.[G]		2	2	pcri_g8718.t1; pcri_g8716.t1	pcri_g8718.t1; pcri_g8716.t1	0	2	MS2	0.599		0	200	1	39.5545	1	20171101_08.RAW	1685.89
		FALSE	High		Sequest HT (Q2)	Unambiguous	[R].VAMLAVVGVLTVEAQGK.[G]		2	2	pcri_g8718.t1; pcri_g8716.t1	pcri_g8718.t1; pcri_g8716.t1	0	2	MS2	0.5538		0	200	1	39.3283	1	20171202_04.RAW	1685.67
		FALSE	High		Sequest HT (V2)	Unambiguous	[R].VAMLAVVGVLTVEAQGK.[G]		2	2	pcri_g8718.t1; pcri_g8716.t1	pcri_g8718.t1; pcri_g8716.t1	0	3	MS2	0.4244		0	200	1	39.9917	1	20171101_blank08.RAW	1689.54
		FALSE	High		Sequest HT (V2)	Unambiguous	[R].VAMLAVVGVLTVEAQGK.[G]		2	2	pcri_g8718.t1; pcri_g8716.t1	pcri_g8718.t1; pcri_g8716.t1	0	3	MS2	0.5544		0	200	1	39.7523	1	20171101_blank08.RAW	1684.87
		FALSE	High		Sequest HT (AI2)	Unambiguous	[R].VAMLAVVGVLTVEAQGK.[G]		2	2	pcri_g8718.t1; pcri_g8716.t1	pcri_g8718.t1; pcri_g8716.t1	0	3	MS2	0.5676		0	200	1	39.4373	1	20171101_05.RAW	1686.17
		FALSE	High		Sequest HT (AJ2)	Unambiguous	[R].VAMLAVVGVLTVEAQGK.[G]		2	2	pcri_g8718.t1; pcri_g8716.t1	pcri_g8718.t1; pcri_g8716.t1	0	3	MS2	0.4836		0	200	1	46.5563	1	20171101_04.RAW	1686.3
		FALSE	High		Sequest HT (M2)	Unambiguous	[R].VAMLAVVGVLTVEAQGK.[G]		2	2	pcri_g8718.t1; pcri_g8716.t1	pcri_g8718.t1; pcri_g8716.t1	0	2	MS2	0.5417		0	200	1	38.9516	1	20171202_08.RAW	1685.63
		FALSE	High		Sequest HT (AJ2)	Unambiguous	[R].VAMLAVVGVLTVEAQGK.[G]		2	2	pcri_g8718.t1; pcri_g8716.t1	pcri_g8718.t1; pcri_g8716.t1	0	2	MS2	0.5465		0	200	1	41.4377	1	20171101_04.RAW	1685.82
		FALSE	High		Sequest HT (AJ2)	Unambiguous	[R].VAMLAVVGVLTVEAQGK.[G]		2	2	pcri_g8718.t1; pcri_g8716.t1	pcri_g8718.t1; pcri_g8716.t1	0	2	MS2	0.5972		0	200	1	49.1174	1	20171101_04.RAW	1685.19
		FALSE	High		Sequest HT (N2)	Unambiguous	[R].VAMLAVVGVLTVEAQGK.[G]		2	2	pcri_g8718.t1; pcri_g8716.t1	pcri_g8718.t1; pcri_g8716.t1	0	2	MS2	0.6		0	200	1	38.9184	1	20171202_07.RAW	1685.39
	FALSE	High	[R].ETGQAGHFGAAR.[F]				2	2	31	pcri_g8718.t1; pcri_g8716.t1	pcri_g8718.t1 pcri_g8716.t1	pcri_g8718.t1 [187-198]; pcri_g8716.t1 [187-198]	0	1201.57	Not Found	Not Found	Not Found	High	Not Found	High	Not Found	High	Not Found	Not Found	Not Found	High	Not Found	High	Not Found	High	Not Found	High	High	Not Found	Not Found	High	3.59	R.ETGQAGHFGAAR.F	[187-198]
		Checked	Confidence		Identifying Node	PSM Ambiguity	Annotated Sequence	Modifications	# Protein Groups	# Proteins	Master Protein Accessions	Protein Accessions	# Missed Cleavages	Charge	MS Order	DeltaScore	Isolation Interference [%]	DeltaCn	Ion Inject Time [ms]	Rank	RT [min]	Search Engine Rank	Spectrum File	MH+ [Da]
		FALSE	High		Sequest HT (S2)	Rejected	[R].ETGQAGHFGAAR.[F]		2	2	pcri_g8718.t1; pcri_g8716.t1	pcri_g8718.t1; pcri_g8716.t1	0	2	MS2	0.0223		0	200	1	19.3474	1	20171202_02.RAW	1202.87
		FALSE	High		Sequest HT (AD2)	Unambiguous	[R].ETGQAGHFGAAR.[F]		2	2	pcri_g8718.t1; pcri_g8716.t1	pcri_g8718.t1; pcri_g8716.t1	0	2	MS2	0.2735		0	176.192	1	18.4164	1	20171101_10.RAW	1202.17
		FALSE	High		Sequest HT (AI2)	Unambiguous	[R].ETGQAGHFGAAR.[F]		2	2	pcri_g8718.t1; pcri_g8716.t1	pcri_g8718.t1; pcri_g8716.t1	0	2	MS2	0.2232		0	52.584	1	17.1417	1	20171101_05.RAW	1203.13
		FALSE	High		Sequest HT (R2)	Unambiguous	[R].ETGQAGHFGAAR.[F]		2	2	pcri_g8718.t1; pcri_g8716.t1	pcri_g8718.t1; pcri_g8716.t1	0	2	MS2	0.186		0	200	1	13.4648	1	20171202_03.RAW	1202.39
		FALSE	High		Sequest HT (AD2)	Unambiguous	[R].ETGQAGHFGAAR.[F]		2	2	pcri_g8718.t1; pcri_g8716.t1	pcri_g8718.t1; pcri_g8716.t1	0	2	MS2	0.276		0	200	1	20.0603	1	20171101_10.RAW	1202.39
		FALSE	High		Sequest HT (AJ2)	Unambiguous	[R].ETGQAGHFGAAR.[F]		2	2	pcri_g8718.t1; pcri_g8716.t1	pcri_g8718.t1; pcri_g8716.t1	0	2	MS2	0.2636		0	73.131	1	17.713	1	20171101_04.RAW	1202.48
		FALSE	High		Sequest HT (AJ2)	Unambiguous	[R].ETGQAGHFGAAR.[F]		2	2	pcri_g8718.t1; pcri_g8716.t1	pcri_g8718.t1; pcri_g8716.t1	0	2	MS2	0.2219		0	69.609	1	17.1725	1	20171101_04.RAW	1203.38
		FALSE	High		Sequest HT (AI2)	Unambiguous	[R].ETGQAGHFGAAR.[F]		2	2	pcri_g8718.t1; pcri_g8716.t1	pcri_g8718.t1; pcri_g8716.t1	0	2	MS2	0.2416		0	200	1	20.4338	1	20171101_05.RAW	1202.4
		FALSE	High		Sequest HT (AI2)	Unambiguous	[R].ETGQAGHFGAAR.[F]		2	2	pcri_g8718.t1; pcri_g8716.t1	pcri_g8718.t1; pcri_g8716.t1	0	2	MS2	0.2669		0	200	1	18.7838	1	20171101_05.RAW	1202.23
		FALSE	High		Sequest HT (AD2)	Unambiguous	[R].ETGQAGHFGAAR.[F]		2	2	pcri_g8718.t1; pcri_g8716.t1	pcri_g8718.t1; pcri_g8716.t1	0	2	MS2	0.1969		0	29.883	1	16.7778	1	20171101_10.RAW	1202.25
		FALSE	High		Sequest HT (AJ2)	Unambiguous	[R].ETGQAGHFGAAR.[F]		2	2	pcri_g8718.t1; pcri_g8716.t1	pcri_g8718.t1; pcri_g8716.t1	0	2	MS2	0.284		0	200	1	29.1465	1	20171101_04.RAW	1202.05
		FALSE	High		Sequest HT (AI2)	Unambiguous	[R].ETGQAGHFGAAR.[F]		2	2	pcri_g8718.t1; pcri_g8716.t1	pcri_g8718.t1; pcri_g8716.t1	0	2	MS2	0.2407		0	200	1	19.8771	1	20171101_05.RAW	1202.3
		FALSE	High		Sequest HT (AI2)	Unambiguous	[R].ETGQAGHFGAAR.[F]		2	2	pcri_g8718.t1; pcri_g8716.t1	pcri_g8718.t1; pcri_g8716.t1	0	2	MS2	0.2477		0	200	1	19.3312	1	20171101_05.RAW	1202.14
		FALSE	High		Sequest HT (AD2)	Unambiguous	[R].ETGQAGHFGAAR.[F]		2	2	pcri_g8718.t1; pcri_g8716.t1	pcri_g8718.t1; pcri_g8716.t1	0	2	MS2	0.1838		0	200	1	28.8124	1	20171101_10.RAW	1202.23
		FALSE	High		Sequest HT (AI2)	Unambiguous	[R].ETGQAGHFGAAR.[F]		2	2	pcri_g8718.t1; pcri_g8716.t1	pcri_g8718.t1; pcri_g8716.t1	0	2	MS2	0.1719		0	200	1	20.9792	1	20171101_05.RAW	1202.58
		FALSE	High		Sequest HT (P2)	Unambiguous	[R].ETGQAGHFGAAR.[F]		2	2	pcri_g8718.t1; pcri_g8716.t1	pcri_g8718.t1; pcri_g8716.t1	0	2	MS2	0.146		0	200	1	14.6081	1	20171202_05.RAW	1202.3
		FALSE	High		Sequest HT (AI2)	Unambiguous	[R].ETGQAGHFGAAR.[F]		2	2	pcri_g8718.t1; pcri_g8716.t1	pcri_g8718.t1; pcri_g8716.t1	0	2	MS2	0.2286		0	200	1	21.5484	1	20171101_05.RAW	1201.96
		FALSE	High		Sequest HT (AL2)	Unambiguous	[R].ETGQAGHFGAAR.[F]		2	2	pcri_g8718.t1; pcri_g8716.t1	pcri_g8718.t1; pcri_g8716.t1	0	2	MS2	0.2468		0	200	1	17.4418	1	20171101_02.RAW	1202.59
		FALSE	High		Sequest HT (AI2)	Unambiguous	[R].ETGQAGHFGAAR.[F]		2	2	pcri_g8718.t1; pcri_g8716.t1	pcri_g8718.t1; pcri_g8716.t1	0	2	MS2	0.2233		0	200	1	18.237	1	20171101_05.RAW	1202.34
		FALSE	High		Sequest HT (AF2)	Unambiguous	[R].ETGQAGHFGAAR.[F]		2	2	pcri_g8718.t1; pcri_g8716.t1	pcri_g8718.t1; pcri_g8716.t1	0	2	MS2	0.2704		0	200	1	18.0607	1	20171101_08.RAW	1201.84
		FALSE	High		Sequest HT (AK2)	Unambiguous	[R].ETGQAGHFGAAR.[F]		2	2	pcri_g8718.t1; pcri_g8716.t1	pcri_g8718.t1; pcri_g8716.t1	0	2	MS2	0.2593		0	200	1	18.0896	1	20171101_03.RAW	1202.37
		FALSE	High		Sequest HT (T2)	Unambiguous	[R].ETGQAGHFGAAR.[F]		2	2	pcri_g8718.t1; pcri_g8716.t1	pcri_g8718.t1; pcri_g8716.t1	0	2	MS2	0.1453		0	200	1	13.8686	1	20171202_01.RAW	1202.29
		FALSE	High		Sequest HT (P2)	Unambiguous	[R].ETGQAGHFGAAR.[F]		2	2	pcri_g8718.t1; pcri_g8716.t1	pcri_g8718.t1; pcri_g8716.t1	0	2	MS2	0.273		0	200	1	13.5127	1	20171202_05.RAW	1202.09
		FALSE	High		Sequest HT (E2)	Unambiguous	[R].ETGQAGHFGAAR.[F]		2	2	pcri_g8718.t1; pcri_g8716.t1	pcri_g8718.t1; pcri_g8716.t1	0	2	MS2	0.2192		0	200	1	14.3983	1	20171202_blank06.RAW	1202.57
		FALSE	High		Sequest HT (AK2)	Unambiguous	[R].ETGQAGHFGAAR.[F]		2	2	pcri_g8718.t1; pcri_g8716.t1	pcri_g8718.t1; pcri_g8716.t1	0	2	MS2	0.342		0	200	1	19.3137	1	20171101_03.RAW	1200.93
		FALSE	High		Sequest HT (B2)	Unambiguous	[R].ETGQAGHFGAAR.[F]		2	2	pcri_g8718.t1; pcri_g8716.t1	pcri_g8718.t1; pcri_g8716.t1	0	2	MS2	0.2031		0	200	1	13.8458	1	20171202_blank09.RAW	1202.21
		FALSE	High		Sequest HT (P2)	Unambiguous	[R].ETGQAGHFGAAR.[F]		2	2	pcri_g8718.t1; pcri_g8716.t1	pcri_g8718.t1; pcri_g8716.t1	0	1	MS2	0.2897		0	200	1	13.6827	1	20171202_05.RAW	1201.74
		FALSE	High		Sequest HT (AJ2)	Unambiguous	[R].ETGQAGHFGAAR.[F]		2	2	pcri_g8718.t1; pcri_g8716.t1	pcri_g8718.t1; pcri_g8716.t1	0	1	MS2	0.2689		0	200	1	17.5852	1	20171101_04.RAW	1202.6
		FALSE	High		Sequest HT (Q2)	Unambiguous	[R].ETGQAGHFGAAR.[F]		2	2	pcri_g8718.t1; pcri_g8716.t1	pcri_g8718.t1; pcri_g8716.t1	0	1	MS2	0.3671		0	200	1	13.6266	1	20171202_04.RAW	1201.73
		FALSE	High		Sequest HT (AD2)	Unambiguous	[R].ETGQAGHFGAAR.[F]		2	2	pcri_g8718.t1; pcri_g8716.t1	pcri_g8718.t1; pcri_g8716.t1	0	1	MS2	0.323		0	200	1	16.8925	1	20171101_10.RAW	1201.84
		FALSE	High		Sequest HT (K2)	Unambiguous	[R].ETGQAGHFGAAR.[F]		2	2	pcri_g8718.t1; pcri_g8716.t1	pcri_g8718.t1; pcri_g8716.t1	0	1	MS2	0.349		0	200	1	13.9092	1	20171202_10.RAW	1201.43
	FALSE	High	[R].DNLWEIGGPYWWPFSSFTPPAHLDGSLPGDR.[G]				2	2	1	pcri_g8718.t1; pcri_g8716.t1	pcri_g8718.t1 pcri_g8716.t1	pcri_g8718.t1 [59-89]; pcri_g8716.t1 [59-89]	0	3514.65	Not Found	Not Found	Not Found	Not Found	Not Found	Not Found	Not Found	Not Found	Not Found	Not Found	Not Found	Not Found	Not Found	Not Found	Not Found	Not Found	Not Found	High	Not Found	Not Found	Not Found	High	4.87	R.DNLWEIGGPYWWPFSSFTPPAHLDGSLPGDR.G	[59-89]
		Checked	Confidence		Identifying Node	PSM Ambiguity	Annotated Sequence	Modifications	# Protein Groups	# Proteins	Master Protein Accessions	Protein Accessions	# Missed Cleavages	Charge	MS Order	DeltaScore	Isolation Interference [%]	DeltaCn	Ion Inject Time [ms]	Rank	RT [min]	Search Engine Rank	Spectrum File	MH+ [Da]
		FALSE	High		Sequest HT (Q2)	Unambiguous	[R].DNLWEIGGPYWWPFSSFTPPAHLDGSLPGDR.[G]		2	2	pcri_g8718.t1; pcri_g8716.t1	pcri_g8718.t1; pcri_g8716.t1	0	3	MS2	0.5811		0	200	1	44.2086	1	20171202_04.RAW	3518.7
	FALSE	High	[K].DHLASPFEANIFTYGDR.[G]				3	3	68	pcri_g8720.t1; pcri_g8718.t1; pcri_g8716.t1	pcri_g8720.t1 pcri_g8718.t1 pcri_g8716.t1	pcri_g8720.t1 [186-202]; pcri_g8718.t1 [250-266]; pcri_g8716.t1 [250-266]	0	1952.91	Not Found	High	Not Found	High	High	High	Not Found	High	High	High	Not Found	High	Not Found	High	Not Found	High	Not Found	High	High	Not Found	High	High	5.64	K.DHLASPFEANIFTYGDR.G	[250-266]
		Checked	Confidence		Identifying Node	PSM Ambiguity	Annotated Sequence	Modifications	# Protein Groups	# Proteins	Master Protein Accessions	Protein Accessions	# Missed Cleavages	Charge	MS Order	DeltaScore	Isolation Interference [%]	DeltaCn	Ion Inject Time [ms]	Rank	RT [min]	Search Engine Rank	Spectrum File	MH+ [Da]
		FALSE	High		Sequest HT (R2)	Unambiguous	[K].DHLASPFEANIFTYGDR.[G]		3	3	pcri_g8720.t1; pcri_g8718.t1; pcri_g8716.t1	pcri_g8720.t1; pcri_g8718.t1; pcri_g8716.t1	0	2	MS2	0.6968		0	200	1	32.6426	1	20171202_03.RAW	1953.97
		FALSE	High		Sequest HT (T2)	Unambiguous	[K].DHLASPFEANIFTYGDR.[G]		3	3	pcri_g8720.t1; pcri_g8718.t1; pcri_g8716.t1	pcri_g8720.t1; pcri_g8718.t1; pcri_g8716.t1	0	2	MS2	0.6961		0	200	1	32.9518	1	20171202_01.RAW	1954.36
		FALSE	High		Sequest HT (AJ2)	Unambiguous	[K].DHLASPFEANIFTYGDR.[G]		3	3	pcri_g8720.t1; pcri_g8718.t1; pcri_g8716.t1	pcri_g8720.t1; pcri_g8718.t1; pcri_g8716.t1	0	2	MS2	0.6979		0	169.577	1	34.424	1	20171101_04.RAW	1953.58
		FALSE	High		Sequest HT (Q2)	Unambiguous	[K].DHLASPFEANIFTYGDR.[G]		3	3	pcri_g8720.t1; pcri_g8718.t1; pcri_g8716.t1	pcri_g8720.t1; pcri_g8718.t1; pcri_g8716.t1	0	2	MS2	0.6629		0	200	1	33.398	1	20171202_04.RAW	1953.52
		FALSE	High		Sequest HT (AM2)	Unambiguous	[K].DHLASPFEANIFTYGDR.[G]		3	3	pcri_g8720.t1; pcri_g8718.t1; pcri_g8716.t1	pcri_g8720.t1; pcri_g8718.t1; pcri_g8716.t1	0	2	MS2	0.6881		0	200	1	34.8737	1	20171101_01.RAW	1954.42
		FALSE	High		Sequest HT (AJ2)	Unambiguous	[K].DHLASPFEANIFTYGDR.[G]		3	3	pcri_g8720.t1; pcri_g8718.t1; pcri_g8716.t1	pcri_g8720.t1; pcri_g8718.t1; pcri_g8716.t1	0	2	MS2	0.7086		0	200	1	58.9302	1	20171101_04.RAW	1954.55
		FALSE	High		Sequest HT (Q2)	Unambiguous	[K].DHLASPFEANIFTYGDR.[G]		3	3	pcri_g8720.t1; pcri_g8718.t1; pcri_g8716.t1	pcri_g8720.t1; pcri_g8718.t1; pcri_g8716.t1	0	2	MS2	0.739		0	200	1	35.5073	1	20171202_04.RAW	1954.3
		FALSE	High		Sequest HT (Q2)	Unambiguous	[K].DHLASPFEANIFTYGDR.[G]		3	3	pcri_g8720.t1; pcri_g8718.t1; pcri_g8716.t1	pcri_g8720.t1; pcri_g8718.t1; pcri_g8716.t1	0	2	MS2	0.7162		0	200	1	32.8568	1	20171202_04.RAW	1953.49
		FALSE	High		Sequest HT (S2)	Unambiguous	[K].DHLASPFEANIFTYGDR.[G]		3	3	pcri_g8720.t1; pcri_g8718.t1; pcri_g8716.t1	pcri_g8720.t1; pcri_g8718.t1; pcri_g8716.t1	0	2	MS2	0.7297		0	200	1	32.6648	1	20171202_02.RAW	1953.81
		FALSE	High		Sequest HT (Q2)	Unambiguous	[K].DHLASPFEANIFTYGDR.[G]		3	3	pcri_g8720.t1; pcri_g8718.t1; pcri_g8716.t1	pcri_g8720.t1; pcri_g8718.t1; pcri_g8716.t1	0	2	MS2	0.6471		0	133.811	1	32.9828	1	20171202_04.RAW	1956.63
		FALSE	High		Sequest HT (AL2)	Unambiguous	[K].DHLASPFEANIFTYGDR.[G]		3	3	pcri_g8720.t1; pcri_g8718.t1; pcri_g8716.t1	pcri_g8720.t1; pcri_g8718.t1; pcri_g8716.t1	0	2	MS2	0.6798		0	200	1	34.2406	1	20171101_02.RAW	1954.67
		FALSE	High		Sequest HT (AK2)	Unambiguous	[K].DHLASPFEANIFTYGDR.[G]		3	3	pcri_g8720.t1; pcri_g8718.t1; pcri_g8716.t1	pcri_g8720.t1; pcri_g8718.t1; pcri_g8716.t1	0	2	MS2	0.7303		0	200	1	34.8469	1	20171101_03.RAW	1953.69
		FALSE	High		Sequest HT (S2)	Unambiguous	[K].DHLASPFEANIFTYGDR.[G]		3	3	pcri_g8720.t1; pcri_g8718.t1; pcri_g8716.t1	pcri_g8720.t1; pcri_g8718.t1; pcri_g8716.t1	0	2	MS2	0.6473		0	200	1	33.2159	1	20171202_02.RAW	1953.82
		FALSE	High		Sequest HT (Q2)	Unambiguous	[K].DHLASPFEANIFTYGDR.[G]		3	3	pcri_g8720.t1; pcri_g8718.t1; pcri_g8716.t1	pcri_g8720.t1; pcri_g8718.t1; pcri_g8716.t1	0	2	MS2	0.7247		0	200	1	33.9742	1	20171202_04.RAW	1953.77
		FALSE	High		Sequest HT (S2)	Unambiguous	[K].DHLASPFEANIFTYGDR.[G]		3	3	pcri_g8720.t1; pcri_g8718.t1; pcri_g8716.t1	pcri_g8720.t1; pcri_g8718.t1; pcri_g8716.t1	0	2	MS2	0.7137		0	200	1	33.7786	1	20171202_02.RAW	1954.5
		FALSE	High		Sequest HT (P2)	Unambiguous	[K].DHLASPFEANIFTYGDR.[G]		3	3	pcri_g8720.t1; pcri_g8718.t1; pcri_g8716.t1	pcri_g8720.t1; pcri_g8718.t1; pcri_g8716.t1	0	2	MS2	0.7239		0	200	1	32.9008	1	20171202_05.RAW	1953.8
		FALSE	High		Sequest HT (P2)	Unambiguous	[K].DHLASPFEANIFTYGDR.[G]		3	3	pcri_g8720.t1; pcri_g8718.t1; pcri_g8716.t1	pcri_g8720.t1; pcri_g8718.t1; pcri_g8716.t1	0	2	MS2	0.7377		0	200	1	34.0746	1	20171202_05.RAW	1953.2
		FALSE	High		Sequest HT (AI2)	Unambiguous	[K].DHLASPFEANIFTYGDR.[G]		3	3	pcri_g8720.t1; pcri_g8718.t1; pcri_g8716.t1	pcri_g8720.t1; pcri_g8718.t1; pcri_g8716.t1	0	2	MS2	0.6879		0	200	1	34.9659	1	20171101_05.RAW	1953.28
		FALSE	High		Sequest HT (Y2)	Unambiguous	[K].DHLASPFEANIFTYGDR.[G]		3	3	pcri_g8720.t1; pcri_g8718.t1; pcri_g8716.t1	pcri_g8720.t1; pcri_g8718.t1; pcri_g8716.t1	0	2	MS2	0.7273		0	200	1	34.5686	1	20171101_blank05.RAW	1953.62
		FALSE	High		Sequest HT (AJ2)	Unambiguous	[K].DHLASPFEANIFTYGDR.[G]		3	3	pcri_g8720.t1; pcri_g8718.t1; pcri_g8716.t1	pcri_g8720.t1; pcri_g8718.t1; pcri_g8716.t1	0	2	MS2	0.7069		0	200	1	57.6006	1	20171101_04.RAW	1954.65
		FALSE	High		Sequest HT (AJ2)	Unambiguous	[K].DHLASPFEANIFTYGDR.[G]		3	3	pcri_g8720.t1; pcri_g8718.t1; pcri_g8716.t1	pcri_g8720.t1; pcri_g8718.t1; pcri_g8716.t1	0	2	MS2	0.652		0	200	1	34.9807	1	20171101_04.RAW	1953.42
		FALSE	High		Sequest HT (AJ2)	Unambiguous	[K].DHLASPFEANIFTYGDR.[G]		3	3	pcri_g8720.t1; pcri_g8718.t1; pcri_g8716.t1	pcri_g8720.t1; pcri_g8718.t1; pcri_g8716.t1	0	2	MS2	0.6681		0	200	1	37.7082	1	20171101_04.RAW	1954.13
		FALSE	High		Sequest HT (AI2)	Unambiguous	[K].DHLASPFEANIFTYGDR.[G]		3	3	pcri_g8720.t1; pcri_g8718.t1; pcri_g8716.t1	pcri_g8720.t1; pcri_g8718.t1; pcri_g8716.t1	0	2	MS2	0.7232		0	200	1	34.3973	1	20171101_05.RAW	1953.23
		FALSE	High		Sequest HT (AI2)	Unambiguous	[K].DHLASPFEANIFTYGDR.[G]		3	3	pcri_g8720.t1; pcri_g8718.t1; pcri_g8716.t1	pcri_g8720.t1; pcri_g8718.t1; pcri_g8716.t1	0	2	MS2	0.6565		0	200	1	35.7952	1	20171101_05.RAW	1953.67
		FALSE	High		Sequest HT (P2)	Unambiguous	[K].DHLASPFEANIFTYGDR.[G]		3	3	pcri_g8720.t1; pcri_g8718.t1; pcri_g8716.t1	pcri_g8720.t1; pcri_g8718.t1; pcri_g8716.t1	0	2	MS2	0.6848		0	200	1	33.4651	1	20171202_05.RAW	1952.92
		FALSE	High		Sequest HT (AJ2)	Unambiguous	[K].DHLASPFEANIFTYGDR.[G]		3	3	pcri_g8720.t1; pcri_g8718.t1; pcri_g8716.t1	pcri_g8720.t1; pcri_g8718.t1; pcri_g8716.t1	0	2	MS2	0.671		0	200	1	35.672	1	20171101_04.RAW	1953.72
		FALSE	High		Sequest HT (S2)	Unambiguous	[K].DHLASPFEANIFTYGDR.[G]		3	3	pcri_g8720.t1; pcri_g8718.t1; pcri_g8716.t1	pcri_g8720.t1; pcri_g8718.t1; pcri_g8716.t1	0	3	MS2	0.4845		0	200	1	33.7038	1	20171202_02.RAW	1955.09
		FALSE	High		Sequest HT (AJ2)	Unambiguous	[K].DHLASPFEANIFTYGDR.[G]		3	3	pcri_g8720.t1; pcri_g8718.t1; pcri_g8716.t1	pcri_g8720.t1; pcri_g8718.t1; pcri_g8716.t1	0	2	MS2	0.677		0	200	1	58.158	1	20171101_04.RAW	1954.07
		FALSE	High		Sequest HT (X2)	Unambiguous	[K].DHLASPFEANIFTYGDR.[G]		3	3	pcri_g8720.t1; pcri_g8718.t1; pcri_g8716.t1	pcri_g8720.t1; pcri_g8718.t1; pcri_g8716.t1	0	2	MS2	0.6374		0	200	1	34.7926	1	20171101_blank06.RAW	1954.64
		FALSE	High		Sequest HT (AH2)	Unambiguous	[K].DHLASPFEANIFTYGDR.[G]		3	3	pcri_g8720.t1; pcri_g8718.t1; pcri_g8716.t1	pcri_g8720.t1; pcri_g8718.t1; pcri_g8716.t1	0	2	MS2	0.6755		0	200	1	34.8177	1	20171101_06.RAW	1954.77
		FALSE	High		Sequest HT (AJ2)	Unambiguous	[K].DHLASPFEANIFTYGDR.[G]		3	3	pcri_g8720.t1; pcri_g8718.t1; pcri_g8716.t1	pcri_g8720.t1; pcri_g8718.t1; pcri_g8716.t1	0	2	MS2	0.6901		0	200	1	47.374	1	20171101_04.RAW	1953.41
		FALSE	High		Sequest HT (AI2)	Unambiguous	[K].DHLASPFEANIFTYGDR.[G]		3	3	pcri_g8720.t1; pcri_g8718.t1; pcri_g8716.t1	pcri_g8720.t1; pcri_g8718.t1; pcri_g8716.t1	0	3	MS2	0.567		0	200	1	35.4622	1	20171101_05.RAW	1954.45
		FALSE	High		Sequest HT (AJ2)	Unambiguous	[K].DHLASPFEANIFTYGDR.[G]		3	3	pcri_g8720.t1; pcri_g8718.t1; pcri_g8716.t1	pcri_g8720.t1; pcri_g8718.t1; pcri_g8716.t1	0	3	MS2	0.5567		0	200	1	47.5132	1	20171101_04.RAW	1954.96
		FALSE	High		Sequest HT (X2)	Unambiguous	[K].DHLASPFEANIFTYGDR.[G]		3	3	pcri_g8720.t1; pcri_g8718.t1; pcri_g8716.t1	pcri_g8720.t1; pcri_g8718.t1; pcri_g8716.t1	0	3	MS2	0.4668		0	200	1	35.2863	1	20171101_blank06.RAW	1955.33
		FALSE	High		Sequest HT (AJ2)	Unambiguous	[K].DHLASPFEANIFTYGDR.[G]		3	3	pcri_g8720.t1; pcri_g8718.t1; pcri_g8716.t1	pcri_g8720.t1; pcri_g8718.t1; pcri_g8716.t1	0	3	MS2	0.5332		0	200	1	55.9111	1	20171101_04.RAW	1955.02
		FALSE	High		Sequest HT (Q2)	Unambiguous	[K].DHLASPFEANIFTYGDR.[G]		3	3	pcri_g8720.t1; pcri_g8718.t1; pcri_g8716.t1	pcri_g8720.t1; pcri_g8718.t1; pcri_g8716.t1	0	2	MS2	0.6888		0	200	1	34.6993	1	20171202_04.RAW	1952.91
		FALSE	High		Sequest HT (AJ2)	Unambiguous	[K].DHLASPFEANIFTYGDR.[G]		3	3	pcri_g8720.t1; pcri_g8718.t1; pcri_g8716.t1	pcri_g8720.t1; pcri_g8718.t1; pcri_g8716.t1	0	3	MS2	0.3989		0	200	1	54.8029	1	20171101_04.RAW	1955.74
		FALSE	High		Sequest HT (AJ2)	Unambiguous	[K].DHLASPFEANIFTYGDR.[G]		3	3	pcri_g8720.t1; pcri_g8718.t1; pcri_g8716.t1	pcri_g8720.t1; pcri_g8718.t1; pcri_g8716.t1	0	2	MS2	0.6515		0	200	1	44.9237	1	20171101_04.RAW	1955.21
		FALSE	High		Sequest HT (P2)	Unambiguous	[K].DHLASPFEANIFTYGDR.[G]		3	3	pcri_g8720.t1; pcri_g8718.t1; pcri_g8716.t1	pcri_g8720.t1; pcri_g8718.t1; pcri_g8716.t1	0	3	MS2	0.5447		0	200	1	33.4114	1	20171202_05.RAW	1954.29
		FALSE	High		Sequest HT (AJ2)	Unambiguous	[K].DHLASPFEANIFTYGDR.[G]		3	3	pcri_g8720.t1; pcri_g8718.t1; pcri_g8716.t1	pcri_g8720.t1; pcri_g8718.t1; pcri_g8716.t1	0	3	MS2	0.5		0	200	1	45.8864	1	20171101_04.RAW	1953.71
		FALSE	High		Sequest HT (AJ2)	Unambiguous	[K].DHLASPFEANIFTYGDR.[G]		3	3	pcri_g8720.t1; pcri_g8718.t1; pcri_g8716.t1	pcri_g8720.t1; pcri_g8718.t1; pcri_g8716.t1	0	2	MS2	0.6116		0	200	1	41.1789	1	20171101_04.RAW	1953.59
		FALSE	High		Sequest HT (S2)	Unambiguous	[K].DHLASPFEANIFTYGDR.[G]		3	3	pcri_g8720.t1; pcri_g8718.t1; pcri_g8716.t1	pcri_g8720.t1; pcri_g8718.t1; pcri_g8716.t1	0	3	MS2	0.4834		0	200	1	32.6002	1	20171202_02.RAW	1954.1
		FALSE	High		Sequest HT (D2)	Unambiguous	[K].DHLASPFEANIFTYGDR.[G]		3	3	pcri_g8720.t1; pcri_g8718.t1; pcri_g8716.t1	pcri_g8720.t1; pcri_g8718.t1; pcri_g8716.t1	0	3	MS2	0.454		0	200	1	32.9396	1	20171202_blank07.RAW	1954.19
		FALSE	High		Sequest HT (AI2)	Unambiguous	[K].DHLASPFEANIFTYGDR.[G]		3	3	pcri_g8720.t1; pcri_g8718.t1; pcri_g8716.t1	pcri_g8720.t1; pcri_g8718.t1; pcri_g8716.t1	0	3	MS2	0.4846		0	200	1	46.0175	1	20171101_05.RAW	1954.83
		FALSE	High		Sequest HT (Y2)	Unambiguous	[K].DHLASPFEANIFTYGDR.[G]		3	3	pcri_g8720.t1; pcri_g8718.t1; pcri_g8716.t1	pcri_g8720.t1; pcri_g8718.t1; pcri_g8716.t1	0	3	MS2	0.5043		0	200	1	35.4943	1	20171101_blank05.RAW	1954.04
		FALSE	High		Sequest HT (AJ2)	Unambiguous	[K].DHLASPFEANIFTYGDR.[G]		3	3	pcri_g8720.t1; pcri_g8718.t1; pcri_g8716.t1	pcri_g8720.t1; pcri_g8718.t1; pcri_g8716.t1	0	2	MS2	0.6361		0	200	1	43.7151	1	20171101_04.RAW	1954.07
		FALSE	High		Sequest HT (AJ2)	Unambiguous	[K].DHLASPFEANIFTYGDR.[G]		3	3	pcri_g8720.t1; pcri_g8718.t1; pcri_g8716.t1	pcri_g8720.t1; pcri_g8718.t1; pcri_g8716.t1	0	2	MS2	0.6562		0	200	1	50.549	1	20171101_04.RAW	1953.6
		FALSE	High		Sequest HT (AL2)	Unambiguous	[K].DHLASPFEANIFTYGDR.[G]		3	3	pcri_g8720.t1; pcri_g8718.t1; pcri_g8716.t1	pcri_g8720.t1; pcri_g8718.t1; pcri_g8716.t1	0	2	MS2	0.6232		0	200	1	43.3721	1	20171101_02.RAW	1955.59
		FALSE	High		Sequest HT (AA2)	Unambiguous	[K].DHLASPFEANIFTYGDR.[G]		3	3	pcri_g8720.t1; pcri_g8718.t1; pcri_g8716.t1	pcri_g8720.t1; pcri_g8718.t1; pcri_g8716.t1	0	3	MS2	0.4042		0	200	1	34.5173	1	20171101_blank03.RAW	1953.96
		FALSE	High		Sequest HT (AJ2)	Unambiguous	[K].DHLASPFEANIFTYGDR.[G]		3	3	pcri_g8720.t1; pcri_g8718.t1; pcri_g8716.t1	pcri_g8720.t1; pcri_g8718.t1; pcri_g8716.t1	0	2	MS2	0.6336		0	200	1	42.5966	1	20171101_04.RAW	1953.71
		FALSE	High		Sequest HT (AJ2)	Unambiguous	[K].DHLASPFEANIFTYGDR.[G]		3	3	pcri_g8720.t1; pcri_g8718.t1; pcri_g8716.t1	pcri_g8720.t1; pcri_g8718.t1; pcri_g8716.t1	0	2	MS2	0.4532		0	200	1	59.7196	1	20171101_04.RAW	1953.15
		FALSE	High		Sequest HT (S2)	Unambiguous	[K].DHLASPFEANIFTYGDR.[G]		3	3	pcri_g8720.t1; pcri_g8718.t1; pcri_g8716.t1	pcri_g8720.t1; pcri_g8718.t1; pcri_g8716.t1	0	3	MS2	0.5061		0	200	1	33.1513	1	20171202_02.RAW	1953.17
		FALSE	High		Sequest HT (AJ2)	Unambiguous	[K].DHLASPFEANIFTYGDR.[G]		3	3	pcri_g8720.t1; pcri_g8718.t1; pcri_g8716.t1	pcri_g8720.t1; pcri_g8718.t1; pcri_g8716.t1	0	2	MS2	0.6183		0	200	1	55.299	1	20171101_04.RAW	1953.14
		FALSE	High		Sequest HT (Y2)	Unambiguous	[K].DHLASPFEANIFTYGDR.[G]		3	3	pcri_g8720.t1; pcri_g8718.t1; pcri_g8716.t1	pcri_g8720.t1; pcri_g8718.t1; pcri_g8716.t1	0	3	MS2	0.4673		0	200	1	53.8324	1	20171101_blank05.RAW	1954.82
		FALSE	High		Sequest HT (Y2)	Unambiguous	[K].DHLASPFEANIFTYGDR.[G]		3	3	pcri_g8720.t1; pcri_g8718.t1; pcri_g8716.t1	pcri_g8720.t1; pcri_g8718.t1; pcri_g8716.t1	0	3	MS2	0.3036		0	200	1	46.0962	1	20171101_blank05.RAW	1954.02
		FALSE	High		Sequest HT (AH2)	Unambiguous	[K].DHLASPFEANIFTYGDR.[G]		3	3	pcri_g8720.t1; pcri_g8718.t1; pcri_g8716.t1	pcri_g8720.t1; pcri_g8718.t1; pcri_g8716.t1	0	3	MS2	0.3588		0	200	1	34.6472	1	20171101_06.RAW	1953.64
		FALSE	High		Sequest HT (E2)	Unambiguous	[K].DHLASPFEANIFTYGDR.[G]		3	3	pcri_g8720.t1; pcri_g8718.t1; pcri_g8716.t1	pcri_g8720.t1; pcri_g8718.t1; pcri_g8716.t1	0	3	MS2	0.4448		0	200	1	33.0414	1	20171202_blank06.RAW	1953.8
		FALSE	High		Sequest HT (Y2)	Unambiguous	[K].DHLASPFEANIFTYGDR.[G]		3	3	pcri_g8720.t1; pcri_g8718.t1; pcri_g8716.t1	pcri_g8720.t1; pcri_g8718.t1; pcri_g8716.t1	0	3	MS2	0.4426		0	200	1	49.0836	1	20171101_blank05.RAW	1954.14
		FALSE	High		Sequest HT (Y2)	Unambiguous	[K].DHLASPFEANIFTYGDR.[G]		3	3	pcri_g8720.t1; pcri_g8718.t1; pcri_g8716.t1	pcri_g8720.t1; pcri_g8718.t1; pcri_g8716.t1	0	3	MS2	0.5729		0	200	1	34.9442	1	20171101_blank05.RAW	1954.03
		FALSE	High		Sequest HT (Y2)	Unambiguous	[K].DHLASPFEANIFTYGDR.[G]		3	3	pcri_g8720.t1; pcri_g8718.t1; pcri_g8716.t1	pcri_g8720.t1; pcri_g8718.t1; pcri_g8716.t1	0	3	MS2	0.378		0	200	1	48.1782	1	20171101_blank05.RAW	1954.21
		FALSE	High		Sequest HT (Y2)	Unambiguous	[K].DHLASPFEANIFTYGDR.[G]		3	3	pcri_g8720.t1; pcri_g8718.t1; pcri_g8716.t1	pcri_g8720.t1; pcri_g8718.t1; pcri_g8716.t1	0	3	MS2	0.5439		0	200	1	43.7303	1	20171101_blank05.RAW	1954.34
		FALSE	High		Sequest HT (Y2)	Unambiguous	[K].DHLASPFEANIFTYGDR.[G]		3	3	pcri_g8720.t1; pcri_g8718.t1; pcri_g8716.t1	pcri_g8720.t1; pcri_g8718.t1; pcri_g8716.t1	0	3	MS2	0.3922		0	200	1	44.4783	1	20171101_blank05.RAW	1954.23
		FALSE	High		Sequest HT (W2)	Unambiguous	[K].DHLASPFEANIFTYGDR.[G]		3	3	pcri_g8720.t1; pcri_g8718.t1; pcri_g8716.t1	pcri_g8720.t1; pcri_g8718.t1; pcri_g8716.t1	0	3	MS2	0.5089		0	200	1	34.8296	1	20171101_blank07.RAW	1954.5
		FALSE	High		Sequest HT (Y2)	Unambiguous	[K].DHLASPFEANIFTYGDR.[G]		3	3	pcri_g8720.t1; pcri_g8718.t1; pcri_g8716.t1	pcri_g8720.t1; pcri_g8718.t1; pcri_g8716.t1	0	3	MS2	0.1496		0	200	1	47.5774	1	20171101_blank05.RAW	1956.4
		FALSE	High		Sequest HT (Y2)	Unambiguous	[K].DHLASPFEANIFTYGDR.[G]		3	3	pcri_g8720.t1; pcri_g8718.t1; pcri_g8716.t1	pcri_g8720.t1; pcri_g8718.t1; pcri_g8716.t1	0	3	MS2	0.4835		0	200	1	41.9331	1	20171101_blank05.RAW	1955.05
		FALSE	High		Sequest HT (X2)	Unambiguous	[K].DHLASPFEANIFTYGDR.[G]		3	3	pcri_g8720.t1; pcri_g8718.t1; pcri_g8716.t1	pcri_g8720.t1; pcri_g8718.t1; pcri_g8716.t1	0	3	MS2	0.4157		0	200	1	46.4968	1	20171101_blank06.RAW	1953.74
		FALSE	High		Sequest HT (X2)	Unambiguous	[K].DHLASPFEANIFTYGDR.[G]		3	3	pcri_g8720.t1; pcri_g8718.t1; pcri_g8716.t1	pcri_g8720.t1; pcri_g8718.t1; pcri_g8716.t1	0	3	MS2	0.4755		0	200	1	48.0293	1	20171101_blank06.RAW	1955.47
		FALSE	High		Sequest HT (AA2)	Unambiguous	[K].DHLASPFEANIFTYGDR.[G]		3	3	pcri_g8720.t1; pcri_g8718.t1; pcri_g8716.t1	pcri_g8720.t1; pcri_g8718.t1; pcri_g8716.t1	0	2	MS2	0.6		0	200	1	34.8073	1	20171101_blank03.RAW	1953.39
	FALSE	High	[R].FDPLDLIETNPLGTDYNR.[Q]				2	2	38	pcri_g8718.t1; pcri_g8716.t1	pcri_g8718.t1 pcri_g8716.t1	pcri_g8718.t1 [199-216]; pcri_g8716.t1 [199-216]	0	2093.02	Not Found	Not Found	Not Found	Not Found	Not Found	Not Found	Not Found	High	High	Not Found	Not Found	High	Not Found	Not Found	Not Found	Not Found	Not Found	High	Not Found	Not Found	Not Found	High	5.91	R.FDPLDLIETNPLGTDYNR.Q	[199-216]
		Checked	Confidence		Identifying Node	PSM Ambiguity	Annotated Sequence	Modifications	# Protein Groups	# Proteins	Master Protein Accessions	Protein Accessions	# Missed Cleavages	Charge	MS Order	DeltaScore	Isolation Interference [%]	DeltaCn	Ion Inject Time [ms]	Rank	RT [min]	Search Engine Rank	Spectrum File	MH+ [Da]
		FALSE	High		Sequest HT (K2)	Unambiguous	[R].FDPLDLIETNPLGTDYNR.[Q]		2	2	pcri_g8718.t1; pcri_g8716.t1	pcri_g8718.t1; pcri_g8716.t1	0	2	MS2	0.6074		0	200	1	39.6297	1	20171202_10.RAW	2095.53
		FALSE	High		Sequest HT (Q2)	Unambiguous	[R].FDPLDLIETNPLGTDYNR.[Q]		2	2	pcri_g8718.t1; pcri_g8716.t1	pcri_g8718.t1; pcri_g8716.t1	0	2	MS2	0.5087		0	200	1	39.427	1	20171202_04.RAW	2096.42
		FALSE	High		Sequest HT (AJ2)	Unambiguous	[R].FDPLDLIETNPLGTDYNR.[Q]		2	2	pcri_g8718.t1; pcri_g8716.t1	pcri_g8718.t1; pcri_g8716.t1	0	2	MS2	0.6989		0	200	1	39.7668	1	20171101_04.RAW	2094.5
		FALSE	High		Sequest HT (AD2)	Unambiguous	[R].FDPLDLIETNPLGTDYNR.[Q]		2	2	pcri_g8718.t1; pcri_g8716.t1	pcri_g8718.t1; pcri_g8716.t1	0	2	MS2	0.6155		0	200	1	40.2641	1	20171101_10.RAW	2094.34
		FALSE	High		Sequest HT (AI2)	Unambiguous	[R].FDPLDLIETNPLGTDYNR.[Q]		2	2	pcri_g8718.t1; pcri_g8716.t1	pcri_g8718.t1; pcri_g8716.t1	0	2	MS2	0.6507		0	200	1	39.6086	1	20171101_05.RAW	2094.29
		FALSE	High		Sequest HT (AJ2)	Unambiguous	[R].FDPLDLIETNPLGTDYNR.[Q]		2	2	pcri_g8718.t1; pcri_g8716.t1	pcri_g8718.t1; pcri_g8716.t1	0	2	MS2	0.6978		0	200	1	40.3172	1	20171101_04.RAW	2094.36
		FALSE	High		Sequest HT (Y2)	Unambiguous	[R].FDPLDLIETNPLGTDYNR.[Q]		2	2	pcri_g8718.t1; pcri_g8716.t1	pcri_g8718.t1; pcri_g8716.t1	0	2	MS2	0.6469		0	200	1	39.9021	1	20171101_blank05.RAW	2093.9
		FALSE	High		Sequest HT (AF2)	Unambiguous	[R].FDPLDLIETNPLGTDYNR.[Q]		2	2	pcri_g8718.t1; pcri_g8716.t1	pcri_g8718.t1; pcri_g8716.t1	0	2	MS2	0.6311		0	200	1	39.9523	1	20171101_08.RAW	2094.78
		FALSE	High		Sequest HT (P2)	Unambiguous	[R].FDPLDLIETNPLGTDYNR.[Q]		2	2	pcri_g8718.t1; pcri_g8716.t1	pcri_g8718.t1; pcri_g8716.t1	0	2	MS2	0.6928		0	122.607	1	39.6473	1	20171202_05.RAW	2093.41
		FALSE	High		Sequest HT (V2)	Unambiguous	[R].FDPLDLIETNPLGTDYNR.[Q]		2	2	pcri_g8718.t1; pcri_g8716.t1	pcri_g8718.t1; pcri_g8716.t1	0	2	MS2	0.6525		0	200	1	39.9372	1	20171101_blank08.RAW	2093.47
		FALSE	High		Sequest HT (AD2)	Unambiguous	[R].FDPLDLIETNPLGTDYNR.[Q]		2	2	pcri_g8718.t1; pcri_g8716.t1	pcri_g8718.t1; pcri_g8716.t1	0	2	MS2	0.6261		0	200	1	39.7005	1	20171101_10.RAW	2093.91
		FALSE	High		Sequest HT (K2)	Unambiguous	[R].FDPLDLIETNPLGTDYNR.[Q]		2	2	pcri_g8718.t1; pcri_g8716.t1	pcri_g8718.t1; pcri_g8716.t1	0	2	MS2	0.5597		0	200	1	40.2935	1	20171202_10.RAW	2094.79
		FALSE	High		Sequest HT (K2)	Unambiguous	[R].FDPLDLIETNPLGTDYNR.[Q]		2	2	pcri_g8718.t1; pcri_g8716.t1	pcri_g8718.t1; pcri_g8716.t1	0	2	MS2	0.7127		0	200	1	39.1706	1	20171202_10.RAW	2092.51
		FALSE	High		Sequest HT (AD2)	Unambiguous	[R].FDPLDLIETNPLGTDYNR.[Q]		2	2	pcri_g8718.t1; pcri_g8716.t1	pcri_g8718.t1; pcri_g8716.t1	0	2	MS2	0.6892		0	200	1	41.3641	1	20171101_10.RAW	2093.68
		FALSE	High		Sequest HT (AJ2)	Unambiguous	[R].FDPLDLIETNPLGTDYNR.[Q]		2	2	pcri_g8718.t1; pcri_g8716.t1	pcri_g8718.t1; pcri_g8716.t1	0	2	MS2	0.7271		0	200	1	40.9325	1	20171101_04.RAW	2093.59
		FALSE	High		Sequest HT (AJ2)	Unambiguous	[R].FDPLDLIETNPLGTDYNR.[Q]		2	2	pcri_g8718.t1; pcri_g8716.t1	pcri_g8718.t1; pcri_g8716.t1	0	2	MS2	0.5645		0	200	1	47.7576	1	20171101_04.RAW	2094.58
		FALSE	High		Sequest HT (AG2)	Unambiguous	[R].FDPLDLIETNPLGTDYNR.[Q]		2	2	pcri_g8718.t1; pcri_g8716.t1	pcri_g8718.t1; pcri_g8716.t1	0	2	MS2	0.6218		0	200	1	39.9811	1	20171101_07.RAW	2094.59
		FALSE	High		Sequest HT (X2)	Unambiguous	[R].FDPLDLIETNPLGTDYNR.[Q]		2	2	pcri_g8718.t1; pcri_g8716.t1	pcri_g8718.t1; pcri_g8716.t1	0	2	MS2	0.6869		0	200	1	40.0606	1	20171101_blank06.RAW	2093.9
		FALSE	High		Sequest HT (AJ2)	Unambiguous	[R].FDPLDLIETNPLGTDYNR.[Q]		2	2	pcri_g8718.t1; pcri_g8716.t1	pcri_g8718.t1; pcri_g8716.t1	0	2	MS2	0.6888		0	200	1	41.4915	1	20171101_04.RAW	2093.99
		FALSE	High		Sequest HT (AD2)	Unambiguous	[R].FDPLDLIETNPLGTDYNR.[Q]		2	2	pcri_g8718.t1; pcri_g8716.t1	pcri_g8718.t1; pcri_g8716.t1	0	2	MS2	0.6936		0	200	1	45.6996	1	20171101_10.RAW	2094.13
		FALSE	High		Sequest HT (K2)	Unambiguous	[R].FDPLDLIETNPLGTDYNR.[Q]		2	2	pcri_g8718.t1; pcri_g8716.t1	pcri_g8718.t1; pcri_g8716.t1	0	2	MS2	0.6571		0	200	1	41.4163	1	20171202_10.RAW	2095.86
		FALSE	High		Sequest HT (AJ2)	Unambiguous	[R].FDPLDLIETNPLGTDYNR.[Q]		2	2	pcri_g8718.t1; pcri_g8716.t1	pcri_g8718.t1; pcri_g8716.t1	0	2	MS2	0.6039		0	200	1	45.2345	1	20171101_04.RAW	2096.37
		FALSE	High		Sequest HT (AJ2)	Unambiguous	[R].FDPLDLIETNPLGTDYNR.[Q]		2	2	pcri_g8718.t1; pcri_g8716.t1	pcri_g8718.t1; pcri_g8716.t1	0	2	MS2	0.5477		0	200	1	46.7255	1	20171101_04.RAW	2095.09
		FALSE	High		Sequest HT (AD2)	Unambiguous	[R].FDPLDLIETNPLGTDYNR.[Q]		2	2	pcri_g8718.t1; pcri_g8716.t1	pcri_g8718.t1; pcri_g8716.t1	0	2	MS2	0.613		0	200	1	40.8131	1	20171101_10.RAW	2093.7
		FALSE	High		Sequest HT (AJ2)	Unambiguous	[R].FDPLDLIETNPLGTDYNR.[Q]		2	2	pcri_g8718.t1; pcri_g8716.t1	pcri_g8718.t1; pcri_g8716.t1	0	2	MS2	0.6849		0	200	1	48.5703	1	20171101_04.RAW	2093.65
		FALSE	High		Sequest HT (AD2)	Unambiguous	[R].FDPLDLIETNPLGTDYNR.[Q]		2	2	pcri_g8718.t1; pcri_g8716.t1	pcri_g8718.t1; pcri_g8716.t1	0	2	MS2	0.6414		0	200	1	41.9566	1	20171101_10.RAW	2093.7
		FALSE	High		Sequest HT (AJ2)	Unambiguous	[R].FDPLDLIETNPLGTDYNR.[Q]		2	2	pcri_g8718.t1; pcri_g8716.t1	pcri_g8718.t1; pcri_g8716.t1	0	2	MS2	0.6016		0	200	1	50.8914	1	20171101_04.RAW	2094.63
		FALSE	High		Sequest HT (Q2)	Unambiguous	[R].FDPLDLIETNPLGTDYNR.[Q]		2	2	pcri_g8718.t1; pcri_g8716.t1	pcri_g8718.t1; pcri_g8716.t1	0	2	MS2	0.6614		0	200	1	39.3391	1	20171202_04.RAW	2092.92
		FALSE	High		Sequest HT (AJ2)	Unambiguous	[R].FDPLDLIETNPLGTDYNR.[Q]		2	2	pcri_g8718.t1; pcri_g8716.t1	pcri_g8718.t1; pcri_g8716.t1	0	2	MS2	0.5134		0	200	1	53.8347	1	20171101_04.RAW	2095.56
		FALSE	High		Sequest HT (AD2)	Unambiguous	[R].FDPLDLIETNPLGTDYNR.[Q]		2	2	pcri_g8718.t1; pcri_g8716.t1	pcri_g8718.t1; pcri_g8716.t1	0	2	MS2	0.6523		0	200	1	42.7726	1	20171101_10.RAW	2093.42
		FALSE	High		Sequest HT (AD2)	Unambiguous	[R].FDPLDLIETNPLGTDYNR.[Q]		2	2	pcri_g8718.t1; pcri_g8716.t1	pcri_g8718.t1; pcri_g8716.t1	0	2	MS2	0.5651		0	200	1	44.1455	1	20171101_10.RAW	2096.2
		FALSE	High		Sequest HT (AJ2)	Unambiguous	[R].FDPLDLIETNPLGTDYNR.[Q]		2	2	pcri_g8718.t1; pcri_g8716.t1	pcri_g8718.t1; pcri_g8716.t1	0	2	MS2	0.6387		0	200	1	44.4847	1	20171101_04.RAW	2094.59
		FALSE	High		Sequest HT (T2)	Unambiguous	[R].FDPLDLIETNPLGTDYNR.[Q]		2	2	pcri_g8718.t1; pcri_g8716.t1	pcri_g8718.t1; pcri_g8716.t1	0	2	MS2	0.6439		0	200	1	39.4903	1	20171202_01.RAW	2093.41
		FALSE	High		Sequest HT (AJ2)	Unambiguous	[R].FDPLDLIETNPLGTDYNR.[Q]		2	2	pcri_g8718.t1; pcri_g8716.t1	pcri_g8718.t1; pcri_g8716.t1	0	2	MS2	0.6407		0	200	1	42.1576	1	20171101_04.RAW	2093.63
		FALSE	High		Sequest HT (AD2)	Unambiguous	[R].FDPLDLIETNPLGTDYNR.[Q]		2	2	pcri_g8718.t1; pcri_g8716.t1	pcri_g8718.t1; pcri_g8716.t1	0	2	MS2	0.535		0	200	1	57.721	1	20171101_10.RAW	2094.2
		FALSE	High		Sequest HT (AJ2)	Unambiguous	[R].FDPLDLIETNPLGTDYNR.[Q]		2	2	pcri_g8718.t1; pcri_g8716.t1	pcri_g8718.t1; pcri_g8716.t1	0	2	MS2	0.5851		0	200	1	42.7259	1	20171101_04.RAW	2094.17
		FALSE	High		Sequest HT (AD2)	Unambiguous	[R].FDPLDLIETNPLGTDYNR.[Q]		2	2	pcri_g8718.t1; pcri_g8716.t1	pcri_g8718.t1; pcri_g8716.t1	0	2	MS2	0.6613		0	200	1	45.1529	1	20171101_10.RAW	2093.29
		FALSE	High		Sequest HT (V2)	Unambiguous	[R].FDPLDLIETNPLGTDYNR.[Q]		2	2	pcri_g8718.t1; pcri_g8716.t1	pcri_g8718.t1; pcri_g8716.t1	0	3	MS2	0.4983		0	200	1	40.035	1	20171101_blank08.RAW	2094.18
	FALSE	High	[R].GTNVVAIFSAFAAVMHIAELAR.[EQ]				3	3	4	pcri_g8720.t1; pcri_g8718.t1; pcri_g8716.t1	pcri_g8720.t1 pcri_g8718.t1 pcri_g8716.t1	pcri_g8720.t1 [203-224]; pcri_g8718.t1 [267-288]; pcri_g8716.t1 [267-288]	0	2288.22	Not Found	Not Found	Not Found	Not Found	Not Found	Not Found	Not Found	High	Not Found	Not Found	Not Found	Not Found	Not Found	Not Found	Not Found	Not Found	Not Found	High	Not Found	Not Found	Not Found	High	4.98	R.GTNVVAIFSAFAAVMHIAELAR.E	[267-288]
		Checked	Confidence		Identifying Node	PSM Ambiguity	Annotated Sequence	Modifications	# Protein Groups	# Proteins	Master Protein Accessions	Protein Accessions	# Missed Cleavages	Charge	MS Order	DeltaScore	Isolation Interference [%]	DeltaCn	Ion Inject Time [ms]	Rank	RT [min]	Search Engine Rank	Spectrum File	MH+ [Da]
		FALSE	High		Sequest HT (Q2)	Unambiguous	[R].GTNVVAIFSAFAAVMHIAELAR.[EQ]		3	3	pcri_g8720.t1; pcri_g8718.t1; pcri_g8716.t1	pcri_g8720.t1; pcri_g8718.t1; pcri_g8716.t1	0	2	MS2	0.6827		0	200	1	48.8566	1	20171202_04.RAW	2289.57
		FALSE	High		Sequest HT (AJ2)	Unambiguous	[R].GTNVVAIFSAFAAVMHIAELAR.[EQ]		3	3	pcri_g8720.t1; pcri_g8718.t1; pcri_g8716.t1	pcri_g8720.t1; pcri_g8718.t1; pcri_g8716.t1	0	2	MS2	0.6652		0	200	1	47.5874	1	20171101_04.RAW	2289.78
		FALSE	High		Sequest HT (Q2)	Unambiguous	[R].GTNVVAIFSAFAAVMHIAELAR.[EQ]		3	3	pcri_g8720.t1; pcri_g8718.t1; pcri_g8716.t1	pcri_g8720.t1; pcri_g8718.t1; pcri_g8716.t1	0	3	MS2	0.6173		0	200	1	48.7376	1	20171202_04.RAW	2290.91
		FALSE	High		Sequest HT (Y2)	Unambiguous	[R].GTNVVAIFSAFAAVMHIAELAR.[EQ]		3	3	pcri_g8720.t1; pcri_g8718.t1; pcri_g8716.t1	pcri_g8720.t1; pcri_g8718.t1; pcri_g8716.t1	0	3	MS2	0.4333		0	200	1	48.015	1	20171101_blank05.RAW	2290.17
	FALSE	High	[K].GPWWEIPGNLNLYGAPYVAGVVGTHLAFALLEK.[K]				1	1	1	pcri_g8716.t1	pcri_g8716.t1	pcri_g8716.t1 [147-179]	0	3552.87	Not Found	Not Found	Not Found	Not Found	Not Found	Not Found	Not Found	Not Found	Not Found	Not Found	Not Found	Not Found	Not Found	Not Found	Not Found	Not Found	Not Found	Not Found	Not Found	Not Found	Not Found	High	3.02	K.GPWWEIPGNLNLYGAPYVAGVVGTHLAFALLEK.K	[147-179]
		Checked	Confidence		Identifying Node	PSM Ambiguity	Annotated Sequence	Modifications	# Protein Groups	# Proteins	Master Protein Accessions	Protein Accessions	# Missed Cleavages	Charge	MS Order	DeltaScore	Isolation Interference [%]	DeltaCn	Ion Inject Time [ms]	Rank	RT [min]	Search Engine Rank	Spectrum File	MH+ [Da]
		FALSE	High		Sequest HT (Y2)	Unambiguous	[K].GPWWEIPGNLNLYGAPYVAGVVGTHLAFALLEK.[K]		1	1	pcri_g8716.t1	pcri_g8716.t1	0	3	MS2	0.4503		0	200	1	49.4865	1	20171101_blank05.RAW	3554.85
	FALSE	High	[K].GPIENAKDHLASPFEANIFTYGDR.[G]				3	3	3	pcri_g8720.t1; pcri_g8718.t1; pcri_g8716.t1	pcri_g8720.t1 pcri_g8718.t1 pcri_g8716.t1	pcri_g8720.t1 [179-202]; pcri_g8718.t1 [243-266]; pcri_g8716.t1 [243-266]	1	2662.29	Not Found	Not Found	Not Found	Not Found	Not Found	Not Found	Not Found	High	Not Found	Not Found	Not Found	Not Found	Not Found	Not Found	Not Found	Not Found	Not Found	High	Not Found	Not Found	Not Found	High	6.11	K.GPIENAKDHLASPFEANIFTYGDR.G	[243-266]
		Checked	Confidence		Identifying Node	PSM Ambiguity	Annotated Sequence	Modifications	# Protein Groups	# Proteins	Master Protein Accessions	Protein Accessions	# Missed Cleavages	Charge	MS Order	DeltaScore	Isolation Interference [%]	DeltaCn	Ion Inject Time [ms]	Rank	RT [min]	Search Engine Rank	Spectrum File	MH+ [Da]
		FALSE	High		Sequest HT (Q2)	Unambiguous	[K].GPIENAKDHLASPFEANIFTYGDR.[G]		3	3	pcri_g8720.t1; pcri_g8718.t1; pcri_g8716.t1	pcri_g8720.t1; pcri_g8718.t1; pcri_g8716.t1	1	3	MS2	0.6056		0	200	1	32.0034	1	20171202_04.RAW	2664.41
		FALSE	High		Sequest HT (AJ2)	Unambiguous	[K].GPIENAKDHLASPFEANIFTYGDR.[G]		3	3	pcri_g8720.t1; pcri_g8718.t1; pcri_g8716.t1	pcri_g8720.t1; pcri_g8718.t1; pcri_g8716.t1	1	3	MS2	0.5537		0	200	1	33.4866	1	20171101_04.RAW	2664.57
		FALSE	High		Sequest HT (P2)	Unambiguous	[K].GPIENAKDHLASPFEANIFTYGDR.[G]		3	3	pcri_g8720.t1; pcri_g8718.t1; pcri_g8716.t1	pcri_g8720.t1; pcri_g8718.t1; pcri_g8716.t1	1	3	MS2	0.4671		0	200	1	32.2316	1	20171202_05.RAW	2663.03
	FALSE	High	[K].GPIENAK.[D]				4	4	6	pcri_g8720.t1; pcri_g8718.t1; pcri_g8045.t1; pcri_g8716.t1	pcri_g8720.t1 pcri_g8718.t1 pcri_g8045.t1 pcri_g8716.t1	pcri_g8720.t1 [179-185]; pcri_g8718.t1 [243-249]; pcri_g8045.t1 [238-244]; pcri_g8716.t1 [243-249]	0	728.394	Not Found	Not Found	Not Found	High	Not Found	Not Found	Not Found	High	Not Found	Not Found	Not Found	Not Found	Not Found	High	Not Found	Not Found	Not Found	Not Found	Not Found	Not Found	Not Found	High	1.79	K.GPIENAK.D	[243-249]
		Checked	Confidence		Identifying Node	PSM Ambiguity	Annotated Sequence	Modifications	# Protein Groups	# Proteins	Master Protein Accessions	Protein Accessions	# Missed Cleavages	Charge	MS Order	DeltaScore	Isolation Interference [%]	DeltaCn	Ion Inject Time [ms]	Rank	RT [min]	Search Engine Rank	Spectrum File	MH+ [Da]
		FALSE	High		Sequest HT (AJ2)	Unambiguous	[K].GPIENAK.[D]		4	4	pcri_g8720.t1; pcri_g8718.t1; pcri_g8045.t1; pcri_g8716.t1	pcri_g8720.t1; pcri_g8718.t1; pcri_g8045.t1; pcri_g8716.t1	0	1	MS2	0.2011		0	200	1	13.6354	1	20171101_04.RAW	728.73
		FALSE	High		Sequest HT (S2)	Unambiguous	[K].GPIENAK.[D]		4	4	pcri_g8720.t1; pcri_g8718.t1; pcri_g8045.t1; pcri_g8716.t1	pcri_g8720.t1; pcri_g8718.t1; pcri_g8045.t1; pcri_g8716.t1	0	1	MS2	0.226		0	200	1	11.3199	1	20171202_02.RAW	728.608
		FALSE	High		Sequest HT (AD2)	Unambiguous	[K].GPIENAK.[D]		4	4	pcri_g8720.t1; pcri_g8718.t1; pcri_g8045.t1; pcri_g8716.t1	pcri_g8720.t1; pcri_g8718.t1; pcri_g8045.t1; pcri_g8716.t1	0	1	MS2	0.1698		0	200	1	13.5867	1	20171101_10.RAW	728.544
		FALSE	High		Sequest HT (AL2)	Unambiguous	[K].GPIENAK.[D]		4	4	pcri_g8720.t1; pcri_g8718.t1; pcri_g8045.t1; pcri_g8716.t1	pcri_g8720.t1; pcri_g8718.t1; pcri_g8045.t1; pcri_g8716.t1	0	1	MS2	0.1203		0	200	1	14.9467	1	20171101_02.RAW	728.56
		FALSE	High		Sequest HT (AI2)	Unambiguous	[K].GPIENAK.[D]		4	4	pcri_g8720.t1; pcri_g8718.t1; pcri_g8045.t1; pcri_g8716.t1	pcri_g8720.t1; pcri_g8718.t1; pcri_g8045.t1; pcri_g8716.t1	0	1	MS2	0.2792		0	200	1	13.2061	1	20171101_05.RAW	728.569
		FALSE	High		Sequest HT (AI2)	Unambiguous	[K].GPIENAK.[D]		4	4	pcri_g8720.t1; pcri_g8718.t1; pcri_g8045.t1; pcri_g8716.t1	pcri_g8720.t1; pcri_g8718.t1; pcri_g8045.t1; pcri_g8716.t1	0	1	MS2	0.1565		0	200	1	14.4819	1	20171101_05.RAW	728.552
FALSE	Master Protein	pcri_g8718.t1	BDA47009.1 Photosystem I chlorophyll a/b-binding protein 3-1, chloroplastic [Coccomyxa sp. Obi]	Pc-frLHC2	55	10	414	1	1	307	33.4	6.55	1499.97	10	Not Found	Not Found	Not Found	Not Found	Not Found	Not Found	Not Found	Not Found	Not Found	Not Found	Not Found	Not Found	Not Found	Not Found	Not Found	Not Found	Not Found	High	Not Found	Not Found	Not Found
	Checked	Confidence	Annotated Sequence		Modifications	Modifications in Master Proteins	# Protein Groups	# Proteins	# PSMs	Master Protein Accessions	Master Protein Descriptions	Positions in Master Proteins	# Missed Cleavages	Theo. MH+ [Da]	Found in Sample: [S11] F11: Sample	Found in Sample: [S1] F1: Sample	Found in Sample: [S12] F12: Sample	Found in Sample: [S2] F2: Sample	Found in Sample: [S13] F13: Sample	Found in Sample: [S3] F3: Sample	Found in Sample: [S14] F14: Sample	Found in Sample: [S4] F4: Sample	Found in Sample: [S16] F16: Sample	Found in Sample: [S6] F6: Sample	Found in Sample: [S30] F30: Sample	Found in Sample: [S20] F20: Sample	Found in Sample: [S31] F31: Sample	Found in Sample: [S21] F21: Sample	Found in Sample: [S32] F32: Sample	Found in Sample: [S22] F22: Sample	Found in Sample: [S33] F33: Sample	Found in Sample: [S23] F23: Sample	Found in Sample: [S35] F35: Sample	Found in Sample: [S25] F25: Sample	Found in Sample: [S36] F36: Sample	Confidence (by Search Engine): Sequest HT	XCorr (by Search Engine): Sequest HT	Sequence in Protein	Positions in Protein	Peptide Group Modifications in Protein
	FALSE	High	[R].WLLEGELYNGR.[LV]				4	4	232	pcri_g8720.t1; pcri_g8718.t1; pcri_g8045.t1; pcri_g8716.t1	pcri_g8720.t1 pcri_g8718.t1 pcri_g8045.t1 pcri_g8716.t1	pcri_g8720.t1 [55-65]; pcri_g8718.t1 [119-129]; pcri_g8045.t1 [114-124]; pcri_g8716.t1 [119-129]	0	1349.68	Not Found	High	High	High	High	High	High	High	High	High	Not Found	High	Not Found	High	Not Found	High	Not Found	High	Not Found	Not Found	Not Found	High	4.47	R.WLLEGELYNGR.V	[119-129]
		Checked	Confidence		Identifying Node	PSM Ambiguity	Annotated Sequence	Modifications	# Protein Groups	# Proteins	Master Protein Accessions	Protein Accessions	# Missed Cleavages	Charge	MS Order	DeltaScore	Isolation Interference [%]	DeltaCn	Ion Inject Time [ms]	Rank	RT [min]	Search Engine Rank	Spectrum File	MH+ [Da]
		FALSE	High		Sequest HT (Q2)	Unambiguous	[R].WLLEGELYNGR.[LV]		4	4	pcri_g8720.t1; pcri_g8718.t1; pcri_g8045.t1; pcri_g8716.t1	pcri_g8720.t1; pcri_g8718.t1; pcri_g8045.t1; pcri_g8716.t1	0	2	MS2	0.481		0	200	1	33.3113	1	20171202_04.RAW	1350.15
		FALSE	High		Sequest HT (AD2)	Unambiguous	[R].WLLEGELYNGR.[LV]		4	4	pcri_g8720.t1; pcri_g8718.t1; pcri_g8045.t1; pcri_g8716.t1	pcri_g8720.t1; pcri_g8718.t1; pcri_g8045.t1; pcri_g8716.t1	0	2	MS2	0.537		0	200	1	58.2889	1	20171101_10.RAW	1351.69
		FALSE	High		Sequest HT (AD2)	Unambiguous	[R].WLLEGELYNGR.[LV]		4	4	pcri_g8720.t1; pcri_g8718.t1; pcri_g8045.t1; pcri_g8716.t1	pcri_g8720.t1; pcri_g8718.t1; pcri_g8045.t1; pcri_g8716.t1	0	2	MS2	0.5361		0	200	1	47.0399	1	20171101_10.RAW	1350.55
		FALSE	High		Sequest HT (S2)	Unambiguous	[R].WLLEGELYNGR.[LV]		4	4	pcri_g8720.t1; pcri_g8718.t1; pcri_g8045.t1; pcri_g8716.t1	pcri_g8720.t1; pcri_g8718.t1; pcri_g8045.t1; pcri_g8716.t1	0	2	MS2	0.534		0	200	1	32.977	1	20171202_02.RAW	1350.47
		FALSE	High		Sequest HT (K2)	Unambiguous	[R].WLLEGELYNGR.[LV]		4	4	pcri_g8720.t1; pcri_g8718.t1; pcri_g8045.t1; pcri_g8716.t1	pcri_g8720.t1; pcri_g8718.t1; pcri_g8045.t1; pcri_g8716.t1	0	2	MS2	0.467		0	200	1	33.95	1	20171202_10.RAW	1351.2
		FALSE	High		Sequest HT (AJ2)	Unambiguous	[R].WLLEGELYNGR.[LV]		4	4	pcri_g8720.t1; pcri_g8718.t1; pcri_g8045.t1; pcri_g8716.t1	pcri_g8720.t1; pcri_g8718.t1; pcri_g8045.t1; pcri_g8716.t1	0	2	MS2	0.5849		0	200	1	46.6093	1	20171101_04.RAW	1350.56
		FALSE	High		Sequest HT (AD2)	Unambiguous	[R].WLLEGELYNGR.[LV]		4	4	pcri_g8720.t1; pcri_g8718.t1; pcri_g8045.t1; pcri_g8716.t1	pcri_g8720.t1; pcri_g8718.t1; pcri_g8045.t1; pcri_g8716.t1	0	2	MS2	0.5319		0	200	1	57.7429	1	20171101_10.RAW	1350.48
		FALSE	High		Sequest HT (P2)	Unambiguous	[R].WLLEGELYNGR.[LV]		4	4	pcri_g8720.t1; pcri_g8718.t1; pcri_g8045.t1; pcri_g8716.t1	pcri_g8720.t1; pcri_g8718.t1; pcri_g8045.t1; pcri_g8716.t1	0	2	MS2	0.5201		0	200	1	32.1449	1	20171202_05.RAW	1350.22
		FALSE	High		Sequest HT (AJ2)	Unambiguous	[R].WLLEGELYNGR.[LV]		4	4	pcri_g8720.t1; pcri_g8718.t1; pcri_g8045.t1; pcri_g8716.t1	pcri_g8720.t1; pcri_g8718.t1; pcri_g8045.t1; pcri_g8716.t1	0	2	MS2	0.5071		0	200	1	58.9083	1	20171101_04.RAW	1351.44
		FALSE	High		Sequest HT (AD2)	Unambiguous	[R].WLLEGELYNGR.[LV]		4	4	pcri_g8720.t1; pcri_g8718.t1; pcri_g8045.t1; pcri_g8716.t1	pcri_g8720.t1; pcri_g8718.t1; pcri_g8045.t1; pcri_g8716.t1	0	2	MS2	0.4893		0	200	1	34.8911	1	20171101_10.RAW	1349.65
		FALSE	High		Sequest HT (AJ2)	Unambiguous	[R].WLLEGELYNGR.[LV]		4	4	pcri_g8720.t1; pcri_g8718.t1; pcri_g8045.t1; pcri_g8716.t1	pcri_g8720.t1; pcri_g8718.t1; pcri_g8045.t1; pcri_g8716.t1	0	2	MS2	0.5333		0	200	1	49.9738	1	20171101_04.RAW	1351.57
		FALSE	High		Sequest HT (AD2)	Unambiguous	[R].WLLEGELYNGR.[LV]		4	4	pcri_g8720.t1; pcri_g8718.t1; pcri_g8045.t1; pcri_g8716.t1	pcri_g8720.t1; pcri_g8718.t1; pcri_g8045.t1; pcri_g8716.t1	0	2	MS2	0.5048		0	200	1	35.5361	1	20171101_10.RAW	1351.34
		FALSE	High		Sequest HT (Y2)	Unambiguous	[R].WLLEGELYNGR.[LV]		4	4	pcri_g8720.t1; pcri_g8718.t1; pcri_g8045.t1; pcri_g8716.t1	pcri_g8720.t1; pcri_g8718.t1; pcri_g8045.t1; pcri_g8716.t1	0	2	MS2	0.5096		0	200	1	34.7287	1	20171101_blank05.RAW	1350.57
		FALSE	High		Sequest HT (K2)	Unambiguous	[R].WLLEGELYNGR.[LV]		4	4	pcri_g8720.t1; pcri_g8718.t1; pcri_g8045.t1; pcri_g8716.t1	pcri_g8720.t1; pcri_g8718.t1; pcri_g8045.t1; pcri_g8716.t1	0	2	MS2	0.5933		0	200	1	33.3824	1	20171202_10.RAW	1350.3
		FALSE	High		Sequest HT (Q2)	Unambiguous	[R].WLLEGELYNGR.[LV]		4	4	pcri_g8720.t1; pcri_g8718.t1; pcri_g8045.t1; pcri_g8716.t1	pcri_g8720.t1; pcri_g8718.t1; pcri_g8045.t1; pcri_g8716.t1	0	2	MS2	0.554		0	131.046	1	32.1857	1	20171202_04.RAW	1352.46
		FALSE	High		Sequest HT (AD2)	Unambiguous	[R].WLLEGELYNGR.[LV]		4	4	pcri_g8720.t1; pcri_g8718.t1; pcri_g8045.t1; pcri_g8716.t1	pcri_g8720.t1; pcri_g8718.t1; pcri_g8045.t1; pcri_g8716.t1	0	2	MS2	0.5505		0	200	1	59.4527	1	20171101_10.RAW	1351.51
		FALSE	High		Sequest HT (AD2)	Unambiguous	[R].WLLEGELYNGR.[LV]		4	4	pcri_g8720.t1; pcri_g8718.t1; pcri_g8045.t1; pcri_g8716.t1	pcri_g8720.t1; pcri_g8718.t1; pcri_g8045.t1; pcri_g8716.t1	0	2	MS2	0.5529		0	200	1	48.72	1	20171101_10.RAW	1350.55
		FALSE	High		Sequest HT (AJ2)	Unambiguous	[R].WLLEGELYNGR.[LV]		4	4	pcri_g8720.t1; pcri_g8718.t1; pcri_g8045.t1; pcri_g8716.t1	pcri_g8720.t1; pcri_g8718.t1; pcri_g8045.t1; pcri_g8716.t1	0	2	MS2	0.5628		0	200	1	35.2517	1	20171101_04.RAW	1350.32
		FALSE	High		Sequest HT (R2)	Unambiguous	[R].WLLEGELYNGR.[LV]		4	4	pcri_g8720.t1; pcri_g8718.t1; pcri_g8045.t1; pcri_g8716.t1	pcri_g8720.t1; pcri_g8718.t1; pcri_g8045.t1; pcri_g8716.t1	0	2	MS2	0.5193		0	200	1	32.5997	1	20171202_03.RAW	1350.72
		FALSE	High		Sequest HT (AD2)	Unambiguous	[R].WLLEGELYNGR.[LV]		4	4	pcri_g8720.t1; pcri_g8718.t1; pcri_g8045.t1; pcri_g8716.t1	pcri_g8720.t1; pcri_g8718.t1; pcri_g8045.t1; pcri_g8716.t1	0	2	MS2	0.57		0	200	1	54.0876	1	20171101_10.RAW	1350.45
		FALSE	High		Sequest HT (Q2)	Unambiguous	[R].WLLEGELYNGR.[LV]		4	4	pcri_g8720.t1; pcri_g8718.t1; pcri_g8045.t1; pcri_g8716.t1	pcri_g8720.t1; pcri_g8718.t1; pcri_g8045.t1; pcri_g8716.t1	0	2	MS2	0.5327		0	167.959	1	32.7276	1	20171202_04.RAW	1350.06
		FALSE	High		Sequest HT (U2)	Unambiguous	[R].WLLEGELYNGR.[LV]		4	4	pcri_g8720.t1; pcri_g8718.t1; pcri_g8045.t1; pcri_g8716.t1	pcri_g8720.t1; pcri_g8718.t1; pcri_g8045.t1; pcri_g8716.t1	0	2	MS2	0.5496		0	200	1	34.6248	1	20171101_blank09.RAW	1351.39
		FALSE	High		Sequest HT (AJ2)	Unambiguous	[R].WLLEGELYNGR.[LV]		4	4	pcri_g8720.t1; pcri_g8718.t1; pcri_g8045.t1; pcri_g8716.t1	pcri_g8720.t1; pcri_g8718.t1; pcri_g8045.t1; pcri_g8716.t1	0	2	MS2	0.5157		0	200	1	44.2289	1	20171101_04.RAW	1350.48
		FALSE	High		Sequest HT (AD2)	Unambiguous	[R].WLLEGELYNGR.[LV]		4	4	pcri_g8720.t1; pcri_g8718.t1; pcri_g8045.t1; pcri_g8716.t1	pcri_g8720.t1; pcri_g8718.t1; pcri_g8045.t1; pcri_g8716.t1	0	2	MS2	0.5572		0	200	1	55.3082	1	20171101_10.RAW	1350.33
		FALSE	High		Sequest HT (AD2)	Unambiguous	[R].WLLEGELYNGR.[LV]		4	4	pcri_g8720.t1; pcri_g8718.t1; pcri_g8045.t1; pcri_g8716.t1	pcri_g8720.t1; pcri_g8718.t1; pcri_g8045.t1; pcri_g8716.t1	0	2	MS2	0.5232		0	200	1	49.3408	1	20171101_10.RAW	1350.56
		FALSE	High		Sequest HT (S2)	Unambiguous	[R].WLLEGELYNGR.[LV]		4	4	pcri_g8720.t1; pcri_g8718.t1; pcri_g8045.t1; pcri_g8716.t1	pcri_g8720.t1; pcri_g8718.t1; pcri_g8045.t1; pcri_g8716.t1	0	2	MS2	0.5135		0	195.23	1	32.4281	1	20171202_02.RAW	1349.88
		FALSE	High		Sequest HT (AG2)	Unambiguous	[R].WLLEGELYNGR.[LV]		4	4	pcri_g8720.t1; pcri_g8718.t1; pcri_g8045.t1; pcri_g8716.t1	pcri_g8720.t1; pcri_g8718.t1; pcri_g8045.t1; pcri_g8716.t1	0	2	MS2	0.5332		0	97.362	1	34.2991	1	20171101_07.RAW	1350.45
		FALSE	High		Sequest HT (AJ2)	Unambiguous	[R].WLLEGELYNGR.[LV]		4	4	pcri_g8720.t1; pcri_g8718.t1; pcri_g8045.t1; pcri_g8716.t1	pcri_g8720.t1; pcri_g8718.t1; pcri_g8045.t1; pcri_g8716.t1	0	2	MS2	0.5369		0	200	1	59.9981	1	20171101_04.RAW	1350.53
		FALSE	High		Sequest HT (AJ2)	Unambiguous	[R].WLLEGELYNGR.[LV]		4	4	pcri_g8720.t1; pcri_g8718.t1; pcri_g8045.t1; pcri_g8716.t1	pcri_g8720.t1; pcri_g8718.t1; pcri_g8045.t1; pcri_g8716.t1	0	2	MS2	0.521		0	200	1	42.297	1	20171101_04.RAW	1350.45
		FALSE	High		Sequest HT (AD2)	Unambiguous	[R].WLLEGELYNGR.[LV]		4	4	pcri_g8720.t1; pcri_g8718.t1; pcri_g8045.t1; pcri_g8716.t1	pcri_g8720.t1; pcri_g8718.t1; pcri_g8045.t1; pcri_g8716.t1	0	2	MS2	0.5309		0	200	1	50.9998	1	20171101_10.RAW	1350.76
		FALSE	High		Sequest HT (AJ2)	Unambiguous	[R].WLLEGELYNGR.[LV]		4	4	pcri_g8720.t1; pcri_g8718.t1; pcri_g8045.t1; pcri_g8716.t1	pcri_g8720.t1; pcri_g8718.t1; pcri_g8045.t1; pcri_g8716.t1	0	2	MS2	0.5704		0	200	1	46.0542	1	20171101_04.RAW	1350.75
		FALSE	High		Sequest HT (K2)	Unambiguous	[R].WLLEGELYNGR.[LV]		4	4	pcri_g8720.t1; pcri_g8718.t1; pcri_g8045.t1; pcri_g8716.t1	pcri_g8720.t1; pcri_g8718.t1; pcri_g8045.t1; pcri_g8716.t1	0	2	MS2	0.552		0	200	1	32.1416	1	20171202_10.RAW	1350.32
		FALSE	High		Sequest HT (AD2)	Unambiguous	[R].WLLEGELYNGR.[LV]		4	4	pcri_g8720.t1; pcri_g8718.t1; pcri_g8045.t1; pcri_g8716.t1	pcri_g8720.t1; pcri_g8718.t1; pcri_g8045.t1; pcri_g8716.t1	0	2	MS2	0.4938		0	200	1	58.8386	1	20171101_10.RAW	1351.28
		FALSE	High		Sequest HT (AG2)	Unambiguous	[R].WLLEGELYNGR.[LV]		4	4	pcri_g8720.t1; pcri_g8718.t1; pcri_g8045.t1; pcri_g8716.t1	pcri_g8720.t1; pcri_g8718.t1; pcri_g8045.t1; pcri_g8716.t1	0	2	MS2	0.5174		0	200	1	43.6272	1	20171101_07.RAW	1351.38
		FALSE	High		Sequest HT (AD2)	Unambiguous	[R].WLLEGELYNGR.[LV]		4	4	pcri_g8720.t1; pcri_g8718.t1; pcri_g8045.t1; pcri_g8716.t1	pcri_g8720.t1; pcri_g8718.t1; pcri_g8045.t1; pcri_g8716.t1	0	2	MS2	0.5411		0	200	1	34.3425	1	20171101_10.RAW	1350.43
		FALSE	High		Sequest HT (P2)	Unambiguous	[R].WLLEGELYNGR.[LV]		4	4	pcri_g8720.t1; pcri_g8718.t1; pcri_g8045.t1; pcri_g8716.t1	pcri_g8720.t1; pcri_g8718.t1; pcri_g8045.t1; pcri_g8716.t1	0	2	MS2	0.4888		0	200	1	34.2263	1	20171202_05.RAW	1350.72
		FALSE	High		Sequest HT (AI2)	Unambiguous	[R].WLLEGELYNGR.[LV]		4	4	pcri_g8720.t1; pcri_g8718.t1; pcri_g8045.t1; pcri_g8716.t1	pcri_g8720.t1; pcri_g8718.t1; pcri_g8045.t1; pcri_g8716.t1	0	2	MS2	0.5038		0	200	1	34.6543	1	20171101_05.RAW	1350.06
		FALSE	High		Sequest HT (M2)	Unambiguous	[R].WLLEGELYNGR.[LV]		4	4	pcri_g8720.t1; pcri_g8718.t1; pcri_g8045.t1; pcri_g8716.t1	pcri_g8720.t1; pcri_g8718.t1; pcri_g8045.t1; pcri_g8716.t1	0	2	MS2	0.4987		0	200	1	32.3297	1	20171202_08.RAW	1352.38
		FALSE	High		Sequest HT (N2)	Unambiguous	[R].WLLEGELYNGR.[LV]		4	4	pcri_g8720.t1; pcri_g8718.t1; pcri_g8045.t1; pcri_g8716.t1	pcri_g8720.t1; pcri_g8718.t1; pcri_g8045.t1; pcri_g8716.t1	0	2	MS2	0.5264		0	200	1	31.9466	1	20171202_07.RAW	1350.45
		FALSE	High		Sequest HT (AL2)	Unambiguous	[R].WLLEGELYNGR.[LV]		4	4	pcri_g8720.t1; pcri_g8718.t1; pcri_g8045.t1; pcri_g8716.t1	pcri_g8720.t1; pcri_g8718.t1; pcri_g8045.t1; pcri_g8716.t1	0	2	MS2	0.471		0	200	1	35.0702	1	20171101_02.RAW	1351.24
		FALSE	High		Sequest HT (AD2)	Unambiguous	[R].WLLEGELYNGR.[LV]		4	4	pcri_g8720.t1; pcri_g8718.t1; pcri_g8045.t1; pcri_g8716.t1	pcri_g8720.t1; pcri_g8718.t1; pcri_g8045.t1; pcri_g8716.t1	0	2	MS2	0.5		0	200	1	37.1643	1	20171101_10.RAW	1351
		FALSE	High		Sequest HT (R2)	Unambiguous	[R].WLLEGELYNGR.[LV]		4	4	pcri_g8720.t1; pcri_g8718.t1; pcri_g8045.t1; pcri_g8716.t1	pcri_g8720.t1; pcri_g8718.t1; pcri_g8045.t1; pcri_g8716.t1	0	2	MS2	0.5505		0	200	1	31.8291	1	20171202_03.RAW	1350.46
		FALSE	High		Sequest HT (AJ2)	Unambiguous	[R].WLLEGELYNGR.[LV]		4	4	pcri_g8720.t1; pcri_g8718.t1; pcri_g8045.t1; pcri_g8716.t1	pcri_g8720.t1; pcri_g8718.t1; pcri_g8045.t1; pcri_g8716.t1	0	2	MS2	0.5126		0	200	1	58.3607	1	20171101_04.RAW	1350.1
		FALSE	High		Sequest HT (AK2)	Unambiguous	[R].WLLEGELYNGR.[LV]		4	4	pcri_g8720.t1; pcri_g8718.t1; pcri_g8045.t1; pcri_g8716.t1	pcri_g8720.t1; pcri_g8718.t1; pcri_g8045.t1; pcri_g8716.t1	0	2	MS2	0.5418		0	200	1	34.4824	1	20171101_03.RAW	1350.33
		FALSE	High		Sequest HT (AI2)	Unambiguous	[R].WLLEGELYNGR.[LV]		4	4	pcri_g8720.t1; pcri_g8718.t1; pcri_g8045.t1; pcri_g8716.t1	pcri_g8720.t1; pcri_g8718.t1; pcri_g8045.t1; pcri_g8716.t1	0	2	MS2	0.5544		0	200	1	46.2502	1	20171101_05.RAW	1350.49
		FALSE	High		Sequest HT (AD2)	Unambiguous	[R].WLLEGELYNGR.[LV]		4	4	pcri_g8720.t1; pcri_g8718.t1; pcri_g8045.t1; pcri_g8716.t1	pcri_g8720.t1; pcri_g8718.t1; pcri_g8045.t1; pcri_g8716.t1	0	2	MS2	0.5089		0	200	1	36.3017	1	20171101_10.RAW	1350.66
		FALSE	High		Sequest HT (AI2)	Unambiguous	[R].WLLEGELYNGR.[LV]		4	4	pcri_g8720.t1; pcri_g8718.t1; pcri_g8045.t1; pcri_g8716.t1	pcri_g8720.t1; pcri_g8718.t1; pcri_g8045.t1; pcri_g8716.t1	0	2	MS2	0.5761		0	200	1	58.5217	1	20171101_05.RAW	1350.24
		FALSE	High		Sequest HT (AD2)	Unambiguous	[R].WLLEGELYNGR.[LV]		4	4	pcri_g8720.t1; pcri_g8718.t1; pcri_g8045.t1; pcri_g8716.t1	pcri_g8720.t1; pcri_g8718.t1; pcri_g8045.t1; pcri_g8716.t1	0	2	MS2	0.4645		0	200	1	54.713	1	20171101_10.RAW	1351.45
		FALSE	High		Sequest HT (K2)	Unambiguous	[R].WLLEGELYNGR.[LV]		4	4	pcri_g8720.t1; pcri_g8718.t1; pcri_g8045.t1; pcri_g8716.t1	pcri_g8720.t1; pcri_g8718.t1; pcri_g8045.t1; pcri_g8716.t1	0	2	MS2	0.5598		0	200	1	32.6883	1	20171202_10.RAW	1349.75
		FALSE	High		Sequest HT (AD2)	Unambiguous	[R].WLLEGELYNGR.[LV]		4	4	pcri_g8720.t1; pcri_g8718.t1; pcri_g8045.t1; pcri_g8716.t1	pcri_g8720.t1; pcri_g8718.t1; pcri_g8045.t1; pcri_g8716.t1	0	2	MS2	0.4427		0	200	1	47.5958	1	20171101_10.RAW	1351.47
		FALSE	High		Sequest HT (AJ2)	Unambiguous	[R].WLLEGELYNGR.[LV]		4	4	pcri_g8720.t1; pcri_g8718.t1; pcri_g8045.t1; pcri_g8716.t1	pcri_g8720.t1; pcri_g8718.t1; pcri_g8045.t1; pcri_g8716.t1	0	2	MS2	0.5612		0	200	1	47.1938	1	20171101_04.RAW	1350.52
		FALSE	High		Sequest HT (V2)	Unambiguous	[R].WLLEGELYNGR.[LV]		4	4	pcri_g8720.t1; pcri_g8718.t1; pcri_g8045.t1; pcri_g8716.t1	pcri_g8720.t1; pcri_g8718.t1; pcri_g8045.t1; pcri_g8716.t1	0	2	MS2	0.5051		0	200	1	58.4834	1	20171101_blank08.RAW	1351.68
		FALSE	High		Sequest HT (AI2)	Unambiguous	[R].WLLEGELYNGR.[LV]		4	4	pcri_g8720.t1; pcri_g8718.t1; pcri_g8045.t1; pcri_g8716.t1	pcri_g8720.t1; pcri_g8718.t1; pcri_g8045.t1; pcri_g8716.t1	0	2	MS2	0.5448		0	200	1	38.6709	1	20171101_05.RAW	1350.93
		FALSE	High		Sequest HT (AJ2)	Unambiguous	[R].WLLEGELYNGR.[LV]		4	4	pcri_g8720.t1; pcri_g8718.t1; pcri_g8045.t1; pcri_g8716.t1	pcri_g8720.t1; pcri_g8718.t1; pcri_g8045.t1; pcri_g8716.t1	0	2	MS2	0.5908		0	200	1	53.9418	1	20171101_04.RAW	1350.57
		FALSE	High		Sequest HT (AL2)	Unambiguous	[R].WLLEGELYNGR.[LV]		4	4	pcri_g8720.t1; pcri_g8718.t1; pcri_g8045.t1; pcri_g8716.t1	pcri_g8720.t1; pcri_g8718.t1; pcri_g8045.t1; pcri_g8716.t1	0	2	MS2	0.4706		0	200	1	34.5014	1	20171101_02.RAW	1350
		FALSE	High		Sequest HT (AJ2)	Unambiguous	[R].WLLEGELYNGR.[LV]		4	4	pcri_g8720.t1; pcri_g8718.t1; pcri_g8045.t1; pcri_g8716.t1	pcri_g8720.t1; pcri_g8718.t1; pcri_g8045.t1; pcri_g8716.t1	0	2	MS2	0.5154		0	200	1	37.8915	1	20171101_04.RAW	1350.49
		FALSE	High		Sequest HT (AI2)	Unambiguous	[R].WLLEGELYNGR.[LV]		4	4	pcri_g8720.t1; pcri_g8718.t1; pcri_g8045.t1; pcri_g8716.t1	pcri_g8720.t1; pcri_g8718.t1; pcri_g8045.t1; pcri_g8716.t1	0	2	MS2	0.5872		0	200	1	59.7176	1	20171101_05.RAW	1350.47
		FALSE	High		Sequest HT (AJ2)	Unambiguous	[R].WLLEGELYNGR.[LV]		4	4	pcri_g8720.t1; pcri_g8718.t1; pcri_g8045.t1; pcri_g8716.t1	pcri_g8720.t1; pcri_g8718.t1; pcri_g8045.t1; pcri_g8716.t1	0	2	MS2	0.4744		0	200	1	57.8151	1	20171101_04.RAW	1350.34
		FALSE	High		Sequest HT (AD2)	Unambiguous	[R].WLLEGELYNGR.[LV]		4	4	pcri_g8720.t1; pcri_g8718.t1; pcri_g8045.t1; pcri_g8716.t1	pcri_g8720.t1; pcri_g8718.t1; pcri_g8045.t1; pcri_g8716.t1	0	2	MS2	0.5026		0	200	1	60.003	1	20171101_10.RAW	1351.4
		FALSE	High		Sequest HT (AD2)	Unambiguous	[R].WLLEGELYNGR.[LV]		4	4	pcri_g8720.t1; pcri_g8718.t1; pcri_g8045.t1; pcri_g8716.t1	pcri_g8720.t1; pcri_g8718.t1; pcri_g8045.t1; pcri_g8716.t1	0	2	MS2	0.4256		0	101.373	1	34.44	1	20171101_10.RAW	1353.57
		FALSE	High		Sequest HT (Q2)	Unambiguous	[R].WLLEGELYNGR.[LV]		4	4	pcri_g8720.t1; pcri_g8718.t1; pcri_g8045.t1; pcri_g8716.t1	pcri_g8720.t1; pcri_g8718.t1; pcri_g8045.t1; pcri_g8716.t1	0	2	MS2	0.5129		0	200	1	39.7902	1	20171202_04.RAW	1351.98
		FALSE	High		Sequest HT (AJ2)	Unambiguous	[R].WLLEGELYNGR.[LV]		4	4	pcri_g8720.t1; pcri_g8718.t1; pcri_g8045.t1; pcri_g8716.t1	pcri_g8720.t1; pcri_g8718.t1; pcri_g8045.t1; pcri_g8716.t1	0	2	MS2	0.5438		0	200	1	55.5994	1	20171101_04.RAW	1350.47
		FALSE	High		Sequest HT (AJ2)	Unambiguous	[R].WLLEGELYNGR.[LV]		4	4	pcri_g8720.t1; pcri_g8718.t1; pcri_g8045.t1; pcri_g8716.t1	pcri_g8720.t1; pcri_g8718.t1; pcri_g8045.t1; pcri_g8716.t1	0	2	MS2	0.5685		0	200	1	59.4534	1	20171101_04.RAW	1349.76
		FALSE	High		Sequest HT (AJ2)	Unambiguous	[R].WLLEGELYNGR.[LV]		4	4	pcri_g8720.t1; pcri_g8718.t1; pcri_g8045.t1; pcri_g8716.t1	pcri_g8720.t1; pcri_g8718.t1; pcri_g8045.t1; pcri_g8716.t1	0	2	MS2	0.4755		0	200	1	41.0718	1	20171101_04.RAW	1350.21
		FALSE	High		Sequest HT (AD2)	Unambiguous	[R].WLLEGELYNGR.[LV]		4	4	pcri_g8720.t1; pcri_g8718.t1; pcri_g8045.t1; pcri_g8716.t1	pcri_g8720.t1; pcri_g8718.t1; pcri_g8045.t1; pcri_g8716.t1	0	2	MS2	0.4663		0	200	1	43.1495	1	20171101_10.RAW	1350.63
		FALSE	High		Sequest HT (AJ2)	Unambiguous	[R].WLLEGELYNGR.[LV]		4	4	pcri_g8720.t1; pcri_g8718.t1; pcri_g8045.t1; pcri_g8716.t1	pcri_g8720.t1; pcri_g8718.t1; pcri_g8045.t1; pcri_g8716.t1	0	2	MS2	0.557		0	200	1	57.2462	1	20171101_04.RAW	1350.35
		FALSE	High		Sequest HT (Q2)	Unambiguous	[R].WLLEGELYNGR.[LV]		4	4	pcri_g8720.t1; pcri_g8718.t1; pcri_g8045.t1; pcri_g8716.t1	pcri_g8720.t1; pcri_g8718.t1; pcri_g8045.t1; pcri_g8716.t1	0	2	MS2	0.5221		0	200	1	34.4292	1	20171202_04.RAW	1350.64
		FALSE	High		Sequest HT (AJ2)	Unambiguous	[R].WLLEGELYNGR.[LV]		4	4	pcri_g8720.t1; pcri_g8718.t1; pcri_g8045.t1; pcri_g8716.t1	pcri_g8720.t1; pcri_g8718.t1; pcri_g8045.t1; pcri_g8716.t1	0	2	MS2	0.4442		0	44.52	1	34.1474	1	20171101_04.RAW	1353.19
		FALSE	High		Sequest HT (AJ2)	Unambiguous	[R].WLLEGELYNGR.[LV]		4	4	pcri_g8720.t1; pcri_g8718.t1; pcri_g8045.t1; pcri_g8716.t1	pcri_g8720.t1; pcri_g8718.t1; pcri_g8045.t1; pcri_g8716.t1	0	2	MS2	0.5339		0	200	1	34.0092	1	20171101_04.RAW	1350.01
		FALSE	High		Sequest HT (Q2)	Unambiguous	[R].WLLEGELYNGR.[LV]		4	4	pcri_g8720.t1; pcri_g8718.t1; pcri_g8045.t1; pcri_g8716.t1	pcri_g8720.t1; pcri_g8718.t1; pcri_g8045.t1; pcri_g8716.t1	0	2	MS2	0.5234		0	200	1	33.8663	1	20171202_04.RAW	1351.37
		FALSE	High		Sequest HT (AJ2)	Unambiguous	[R].WLLEGELYNGR.[LV]		4	4	pcri_g8720.t1; pcri_g8718.t1; pcri_g8045.t1; pcri_g8716.t1	pcri_g8720.t1; pcri_g8718.t1; pcri_g8045.t1; pcri_g8716.t1	0	2	MS2	0.5222		0	200	1	43.5643	1	20171101_04.RAW	1350.22
		FALSE	High		Sequest HT (P2)	Unambiguous	[R].WLLEGELYNGR.[LV]		4	4	pcri_g8720.t1; pcri_g8718.t1; pcri_g8045.t1; pcri_g8716.t1	pcri_g8720.t1; pcri_g8718.t1; pcri_g8045.t1; pcri_g8716.t1	0	2	MS2	0.5497		0	200	1	33.4544	1	20171202_05.RAW	1350.36
		FALSE	High		Sequest HT (AD2)	Unambiguous	[R].WLLEGELYNGR.[LV]		4	4	pcri_g8720.t1; pcri_g8718.t1; pcri_g8045.t1; pcri_g8716.t1	pcri_g8720.t1; pcri_g8718.t1; pcri_g8045.t1; pcri_g8716.t1	0	2	MS2	0.5		0	200	1	50.4427	1	20171101_10.RAW	1350.5
		FALSE	High		Sequest HT (AM2)	Unambiguous	[R].WLLEGELYNGR.[LV]		4	4	pcri_g8720.t1; pcri_g8718.t1; pcri_g8045.t1; pcri_g8716.t1	pcri_g8720.t1; pcri_g8718.t1; pcri_g8045.t1; pcri_g8716.t1	0	2	MS2	0.5393		0	200	1	34.487	1	20171101_01.RAW	1350.29
		FALSE	High		Sequest HT (AJ2)	Unambiguous	[R].WLLEGELYNGR.[LV]		4	4	pcri_g8720.t1; pcri_g8718.t1; pcri_g8045.t1; pcri_g8716.t1	pcri_g8720.t1; pcri_g8718.t1; pcri_g8045.t1; pcri_g8716.t1	0	2	MS2	0.5079		0	200	1	34.6925	1	20171101_04.RAW	1350.49
		FALSE	High		Sequest HT (AL2)	Unambiguous	[R].WLLEGELYNGR.[LV]		4	4	pcri_g8720.t1; pcri_g8718.t1; pcri_g8045.t1; pcri_g8716.t1	pcri_g8720.t1; pcri_g8718.t1; pcri_g8045.t1; pcri_g8716.t1	0	2	MS2	0.5445		0	200	1	33.8651	1	20171101_02.RAW	1350.27
		FALSE	High		Sequest HT (AI2)	Unambiguous	[R].WLLEGELYNGR.[LV]		4	4	pcri_g8720.t1; pcri_g8718.t1; pcri_g8045.t1; pcri_g8716.t1	pcri_g8720.t1; pcri_g8718.t1; pcri_g8045.t1; pcri_g8716.t1	0	2	MS2	0.5092		0	200	1	35.3219	1	20171101_05.RAW	1350.51
		FALSE	High		Sequest HT (AD2)	Unambiguous	[R].WLLEGELYNGR.[LV]		4	4	pcri_g8720.t1; pcri_g8718.t1; pcri_g8045.t1; pcri_g8716.t1	pcri_g8720.t1; pcri_g8718.t1; pcri_g8045.t1; pcri_g8716.t1	0	2	MS2	0.4436		0	200	1	43.8876	1	20171101_10.RAW	1350.73
		FALSE	High		Sequest HT (AJ2)	Unambiguous	[R].WLLEGELYNGR.[LV]		4	4	pcri_g8720.t1; pcri_g8718.t1; pcri_g8045.t1; pcri_g8716.t1	pcri_g8720.t1; pcri_g8718.t1; pcri_g8045.t1; pcri_g8716.t1	0	2	MS2	0.5407		0	200	1	51.0729	1	20171101_04.RAW	1350.29
		FALSE	High		Sequest HT (AD2)	Unambiguous	[R].WLLEGELYNGR.[LV]		4	4	pcri_g8720.t1; pcri_g8718.t1; pcri_g8045.t1; pcri_g8716.t1	pcri_g8720.t1; pcri_g8718.t1; pcri_g8045.t1; pcri_g8716.t1	0	2	MS2	0.5579		0	200	1	55.9145	1	20171101_10.RAW	1350.44
		FALSE	High		Sequest HT (AD2)	Unambiguous	[R].WLLEGELYNGR.[LV]		4	4	pcri_g8720.t1; pcri_g8718.t1; pcri_g8045.t1; pcri_g8716.t1	pcri_g8720.t1; pcri_g8718.t1; pcri_g8045.t1; pcri_g8716.t1	0	2	MS2	0.5079		0	200	1	39.0388	1	20171101_10.RAW	1350.22
		FALSE	High		Sequest HT (AJ2)	Unambiguous	[R].WLLEGELYNGR.[LV]		4	4	pcri_g8720.t1; pcri_g8718.t1; pcri_g8045.t1; pcri_g8716.t1	pcri_g8720.t1; pcri_g8718.t1; pcri_g8045.t1; pcri_g8716.t1	0	2	MS2	0.5053		0	200	1	47.7365	1	20171101_04.RAW	1350.4
		FALSE	High		Sequest HT (AI2)	Unambiguous	[R].WLLEGELYNGR.[LV]		4	4	pcri_g8720.t1; pcri_g8718.t1; pcri_g8045.t1; pcri_g8716.t1	pcri_g8720.t1; pcri_g8718.t1; pcri_g8045.t1; pcri_g8716.t1	0	2	MS2	0.5172		0	200	1	55.093	1	20171101_05.RAW	1350.69
		FALSE	High		Sequest HT (AG2)	Unambiguous	[R].WLLEGELYNGR.[LV]		4	4	pcri_g8720.t1; pcri_g8718.t1; pcri_g8045.t1; pcri_g8716.t1	pcri_g8720.t1; pcri_g8718.t1; pcri_g8045.t1; pcri_g8716.t1	0	2	MS2	0.4063		0	200	1	54.0326	1	20171101_07.RAW	1351.29
		FALSE	High		Sequest HT (AI2)	Unambiguous	[R].WLLEGELYNGR.[LV]		4	4	pcri_g8720.t1; pcri_g8718.t1; pcri_g8045.t1; pcri_g8716.t1	pcri_g8720.t1; pcri_g8718.t1; pcri_g8045.t1; pcri_g8716.t1	0	2	MS2	0.5251		0	200	1	57.9407	1	20171101_05.RAW	1350.3
		FALSE	High		Sequest HT (AJ2)	Unambiguous	[R].WLLEGELYNGR.[LV]		4	4	pcri_g8720.t1; pcri_g8718.t1; pcri_g8045.t1; pcri_g8716.t1	pcri_g8720.t1; pcri_g8718.t1; pcri_g8045.t1; pcri_g8716.t1	0	2	MS2	0.5805		0	200	1	49.4068	1	20171101_04.RAW	1350.42
		FALSE	High		Sequest HT (AD2)	Unambiguous	[R].WLLEGELYNGR.[LV]		4	4	pcri_g8720.t1; pcri_g8718.t1; pcri_g8045.t1; pcri_g8716.t1	pcri_g8720.t1; pcri_g8718.t1; pcri_g8045.t1; pcri_g8716.t1	0	2	MS2	0.5397		0	200	1	44.5966	1	20171101_10.RAW	1350.36
		FALSE	High		Sequest HT (AD2)	Unambiguous	[R].WLLEGELYNGR.[LV]		4	4	pcri_g8720.t1; pcri_g8718.t1; pcri_g8045.t1; pcri_g8716.t1	pcri_g8720.t1; pcri_g8718.t1; pcri_g8045.t1; pcri_g8716.t1	0	2	MS2	0.5358		0	200	1	45.881	1	20171101_10.RAW	1350.1
		FALSE	High		Sequest HT (AJ2)	Unambiguous	[R].WLLEGELYNGR.[LV]		4	4	pcri_g8720.t1; pcri_g8718.t1; pcri_g8045.t1; pcri_g8716.t1	pcri_g8720.t1; pcri_g8718.t1; pcri_g8045.t1; pcri_g8716.t1	0	2	MS2	0.5252		0	200	1	41.7283	1	20171101_04.RAW	1350.39
		FALSE	High		Sequest HT (AD2)	Unambiguous	[R].WLLEGELYNGR.[LV]		4	4	pcri_g8720.t1; pcri_g8718.t1; pcri_g8045.t1; pcri_g8716.t1	pcri_g8720.t1; pcri_g8718.t1; pcri_g8045.t1; pcri_g8716.t1	0	2	MS2	0.504		0	200	1	40.5439	1	20171101_10.RAW	1350.35
		FALSE	High		Sequest HT (AD2)	Unambiguous	[R].WLLEGELYNGR.[LV]		4	4	pcri_g8720.t1; pcri_g8718.t1; pcri_g8045.t1; pcri_g8716.t1	pcri_g8720.t1; pcri_g8718.t1; pcri_g8045.t1; pcri_g8716.t1	0	2	MS2	0.5305		0	200	1	37.9922	1	20171101_10.RAW	1350.68
		FALSE	High		Sequest HT (AJ2)	Unambiguous	[R].WLLEGELYNGR.[LV]		4	4	pcri_g8720.t1; pcri_g8718.t1; pcri_g8045.t1; pcri_g8716.t1	pcri_g8720.t1; pcri_g8718.t1; pcri_g8045.t1; pcri_g8716.t1	0	2	MS2	0.5213		0	200	1	44.86	1	20171101_04.RAW	1350.62
		FALSE	High		Sequest HT (S2)	Unambiguous	[R].WLLEGELYNGR.[LV]		4	4	pcri_g8720.t1; pcri_g8718.t1; pcri_g8045.t1; pcri_g8716.t1	pcri_g8720.t1; pcri_g8718.t1; pcri_g8045.t1; pcri_g8716.t1	0	2	MS2	0.5559		0	200	1	34.3522	1	20171202_02.RAW	1350.47
		FALSE	High		Sequest HT (AF2)	Unambiguous	[R].WLLEGELYNGR.[LV]		4	4	pcri_g8720.t1; pcri_g8718.t1; pcri_g8045.t1; pcri_g8716.t1	pcri_g8720.t1; pcri_g8718.t1; pcri_g8045.t1; pcri_g8716.t1	0	2	MS2	0.4827		0	200	1	35.0277	1	20171101_08.RAW	1350.71
		FALSE	High		Sequest HT (AL2)	Unambiguous	[R].WLLEGELYNGR.[LV]		4	4	pcri_g8720.t1; pcri_g8718.t1; pcri_g8045.t1; pcri_g8716.t1	pcri_g8720.t1; pcri_g8718.t1; pcri_g8045.t1; pcri_g8716.t1	0	2	MS2	0.4933		0	200	1	49.3603	1	20171101_02.RAW	1350.43
		FALSE	High		Sequest HT (AJ2)	Unambiguous	[R].WLLEGELYNGR.[LV]		4	4	pcri_g8720.t1; pcri_g8718.t1; pcri_g8045.t1; pcri_g8716.t1	pcri_g8720.t1; pcri_g8718.t1; pcri_g8045.t1; pcri_g8716.t1	0	2	MS2	0.52		0	200	1	48.3024	1	20171101_04.RAW	1350.66
		FALSE	High		Sequest HT (S2)	Unambiguous	[R].WLLEGELYNGR.[LV]		4	4	pcri_g8720.t1; pcri_g8718.t1; pcri_g8045.t1; pcri_g8716.t1	pcri_g8720.t1; pcri_g8718.t1; pcri_g8045.t1; pcri_g8716.t1	0	2	MS2	0.5867		0	200	1	31.8761	1	20171202_02.RAW	1349.76
		FALSE	High		Sequest HT (AD2)	Unambiguous	[R].WLLEGELYNGR.[LV]		4	4	pcri_g8720.t1; pcri_g8718.t1; pcri_g8045.t1; pcri_g8716.t1	pcri_g8720.t1; pcri_g8718.t1; pcri_g8045.t1; pcri_g8716.t1	0	2	MS2	0.4773		0	200	1	42.537	1	20171101_10.RAW	1350.56
		FALSE	High		Sequest HT (P2)	Unambiguous	[R].WLLEGELYNGR.[LV]		4	4	pcri_g8720.t1; pcri_g8718.t1; pcri_g8045.t1; pcri_g8716.t1	pcri_g8720.t1; pcri_g8718.t1; pcri_g8045.t1; pcri_g8716.t1	0	2	MS2	0.5228		0	200	1	32.7287	1	20171202_05.RAW	1349.8
		FALSE	High		Sequest HT (AD2)	Unambiguous	[R].WLLEGELYNGR.[LV]		4	4	pcri_g8720.t1; pcri_g8718.t1; pcri_g8045.t1; pcri_g8716.t1	pcri_g8720.t1; pcri_g8718.t1; pcri_g8045.t1; pcri_g8716.t1	0	2	MS2	0.5067		0	200	1	52.9822	1	20171101_10.RAW	1350.57
		FALSE	High		Sequest HT (V2)	Unambiguous	[R].WLLEGELYNGR.[LV]		4	4	pcri_g8720.t1; pcri_g8718.t1; pcri_g8045.t1; pcri_g8716.t1	pcri_g8720.t1; pcri_g8718.t1; pcri_g8045.t1; pcri_g8716.t1	0	2	MS2	0.5469		0	200	1	34.4113	1	20171101_blank08.RAW	1350.27
		FALSE	High		Sequest HT (AD2)	Unambiguous	[R].WLLEGELYNGR.[LV]		4	4	pcri_g8720.t1; pcri_g8718.t1; pcri_g8045.t1; pcri_g8716.t1	pcri_g8720.t1; pcri_g8718.t1; pcri_g8045.t1; pcri_g8716.t1	0	2	MS2	0.5121		0	200	1	46.4383	1	20171101_10.RAW	1350.28
		FALSE	High		Sequest HT (Y2)	Unambiguous	[R].WLLEGELYNGR.[LV]		4	4	pcri_g8720.t1; pcri_g8718.t1; pcri_g8045.t1; pcri_g8716.t1	pcri_g8720.t1; pcri_g8718.t1; pcri_g8045.t1; pcri_g8716.t1	0	2	MS2	0.4826		0	200	1	34.1611	1	20171101_blank05.RAW	1350.48
		FALSE	High		Sequest HT (T2)	Unambiguous	[R].WLLEGELYNGR.[LV]		4	4	pcri_g8720.t1; pcri_g8718.t1; pcri_g8045.t1; pcri_g8716.t1	pcri_g8720.t1; pcri_g8718.t1; pcri_g8045.t1; pcri_g8716.t1	0	2	MS2	0.5469		0	200	1	32.0976	1	20171202_01.RAW	1350.15
		FALSE	High		Sequest HT (AD2)	Unambiguous	[R].WLLEGELYNGR.[LV]		4	4	pcri_g8720.t1; pcri_g8718.t1; pcri_g8045.t1; pcri_g8716.t1	pcri_g8720.t1; pcri_g8718.t1; pcri_g8045.t1; pcri_g8716.t1	0	2	MS2	0.5469		0	200	1	45.2926	1	20171101_10.RAW	1350.55
		FALSE	High		Sequest HT (AJ2)	Unambiguous	[R].WLLEGELYNGR.[LV]		4	4	pcri_g8720.t1; pcri_g8718.t1; pcri_g8045.t1; pcri_g8716.t1	pcri_g8720.t1; pcri_g8718.t1; pcri_g8045.t1; pcri_g8716.t1	0	2	MS2	0.504		0	200	1	48.8502	1	20171101_04.RAW	1349.69
		FALSE	High		Sequest HT (AJ2)	Unambiguous	[R].WLLEGELYNGR.[LV]		4	4	pcri_g8720.t1; pcri_g8718.t1; pcri_g8045.t1; pcri_g8716.t1	pcri_g8720.t1; pcri_g8718.t1; pcri_g8045.t1; pcri_g8716.t1	0	2	MS2	0.4582		0	200	1	39.1736	1	20171101_04.RAW	1350.32
		FALSE	High		Sequest HT (AJ2)	Unambiguous	[R].WLLEGELYNGR.[LV]		4	4	pcri_g8720.t1; pcri_g8718.t1; pcri_g8045.t1; pcri_g8716.t1	pcri_g8720.t1; pcri_g8718.t1; pcri_g8045.t1; pcri_g8716.t1	0	2	MS2	0.566		0	200	1	53.396	1	20171101_04.RAW	1349.69
		FALSE	High		Sequest HT (AD2)	Unambiguous	[R].WLLEGELYNGR.[LV]		4	4	pcri_g8720.t1; pcri_g8718.t1; pcri_g8045.t1; pcri_g8716.t1	pcri_g8720.t1; pcri_g8718.t1; pcri_g8045.t1; pcri_g8716.t1	0	2	MS2	0.5175		0	200	1	52.4108	1	20171101_10.RAW	1350.35
		FALSE	High		Sequest HT (N2)	Unambiguous	[R].WLLEGELYNGR.[LV]		4	4	pcri_g8720.t1; pcri_g8718.t1; pcri_g8045.t1; pcri_g8716.t1	pcri_g8720.t1; pcri_g8718.t1; pcri_g8045.t1; pcri_g8716.t1	0	2	MS2	0.4744		0	200	1	32.6179	1	20171202_07.RAW	1350.44
		FALSE	High		Sequest HT (Q2)	Unambiguous	[R].WLLEGELYNGR.[LV]		4	4	pcri_g8720.t1; pcri_g8718.t1; pcri_g8045.t1; pcri_g8716.t1	pcri_g8720.t1; pcri_g8718.t1; pcri_g8045.t1; pcri_g8716.t1	0	2	MS2	0.4811		0	200	1	37.0128	1	20171202_04.RAW	1349.77
		FALSE	High		Sequest HT (AD2)	Unambiguous	[R].WLLEGELYNGR.[LV]		4	4	pcri_g8720.t1; pcri_g8718.t1; pcri_g8045.t1; pcri_g8716.t1	pcri_g8720.t1; pcri_g8718.t1; pcri_g8045.t1; pcri_g8716.t1	0	2	MS2	0.4905		0	200	1	41.9245	1	20171101_10.RAW	1350.94
		FALSE	High		Sequest HT (AD2)	Unambiguous	[R].WLLEGELYNGR.[LV]		4	4	pcri_g8720.t1; pcri_g8718.t1; pcri_g8045.t1; pcri_g8716.t1	pcri_g8720.t1; pcri_g8718.t1; pcri_g8045.t1; pcri_g8716.t1	0	2	MS2	0.4715		0	200	1	48.1727	1	20171101_10.RAW	1350.57
		FALSE	High		Sequest HT (AM2)	Unambiguous	[R].WLLEGELYNGR.[LV]		4	4	pcri_g8720.t1; pcri_g8718.t1; pcri_g8045.t1; pcri_g8716.t1	pcri_g8720.t1; pcri_g8718.t1; pcri_g8045.t1; pcri_g8716.t1	0	2	MS2	0.4634		0	200	1	35.0446	1	20171101_01.RAW	1351.39
		FALSE	High		Sequest HT (AL2)	Unambiguous	[R].WLLEGELYNGR.[LV]		4	4	pcri_g8720.t1; pcri_g8718.t1; pcri_g8045.t1; pcri_g8716.t1	pcri_g8720.t1; pcri_g8718.t1; pcri_g8045.t1; pcri_g8716.t1	0	2	MS2	0.4661		0	200	1	37.478	1	20171101_02.RAW	1350.77
		FALSE	High		Sequest HT (V2)	Unambiguous	[R].WLLEGELYNGR.[LV]		4	4	pcri_g8720.t1; pcri_g8718.t1; pcri_g8045.t1; pcri_g8716.t1	pcri_g8720.t1; pcri_g8718.t1; pcri_g8045.t1; pcri_g8716.t1	0	2	MS2	0.4824		0	200	1	34.9581	1	20171101_blank08.RAW	1350.99
		FALSE	High		Sequest HT (T2)	Unambiguous	[R].WLLEGELYNGR.[LV]		4	4	pcri_g8720.t1; pcri_g8718.t1; pcri_g8045.t1; pcri_g8716.t1	pcri_g8720.t1; pcri_g8718.t1; pcri_g8045.t1; pcri_g8716.t1	0	2	MS2	0.4864		0	200	1	32.6694	1	20171202_01.RAW	1350.16
		FALSE	High		Sequest HT (AF2)	Unambiguous	[R].WLLEGELYNGR.[LV]		4	4	pcri_g8720.t1; pcri_g8718.t1; pcri_g8045.t1; pcri_g8716.t1	pcri_g8720.t1; pcri_g8718.t1; pcri_g8045.t1; pcri_g8716.t1	0	2	MS2	0.4837		0	200	1	34.4368	1	20171101_08.RAW	1350.22
		FALSE	High		Sequest HT (AI2)	Unambiguous	[R].WLLEGELYNGR.[LV]		4	4	pcri_g8720.t1; pcri_g8718.t1; pcri_g8045.t1; pcri_g8716.t1	pcri_g8720.t1; pcri_g8718.t1; pcri_g8045.t1; pcri_g8716.t1	0	2	MS2	0.4293		0	200	1	49.7834	1	20171101_05.RAW	1350.41
		FALSE	High		Sequest HT (P2)	Unambiguous	[R].WLLEGELYNGR.[LV]		4	4	pcri_g8720.t1; pcri_g8718.t1; pcri_g8045.t1; pcri_g8716.t1	pcri_g8720.t1; pcri_g8718.t1; pcri_g8045.t1; pcri_g8716.t1	0	2	MS2	0.4523		0	200	1	32.2746	1	20171202_05.RAW	1353.3
		FALSE	High		Sequest HT (AJ2)	Unambiguous	[R].WLLEGELYNGR.[LV]		4	4	pcri_g8720.t1; pcri_g8718.t1; pcri_g8045.t1; pcri_g8716.t1	pcri_g8720.t1; pcri_g8718.t1; pcri_g8045.t1; pcri_g8716.t1	0	2	MS2	0.5313		0	200	1	37.0642	1	20171101_04.RAW	1350.38
		FALSE	High		Sequest HT (AJ2)	Unambiguous	[R].WLLEGELYNGR.[LV]		4	4	pcri_g8720.t1; pcri_g8718.t1; pcri_g8045.t1; pcri_g8716.t1	pcri_g8720.t1; pcri_g8718.t1; pcri_g8045.t1; pcri_g8716.t1	0	2	MS2	0.5341		0	200	1	52.8377	1	20171101_04.RAW	1350.32
		FALSE	High		Sequest HT (K2)	Unambiguous	[R].WLLEGELYNGR.[LV]		4	4	pcri_g8720.t1; pcri_g8718.t1; pcri_g8045.t1; pcri_g8716.t1	pcri_g8720.t1; pcri_g8718.t1; pcri_g8045.t1; pcri_g8716.t1	0	2	MS2	0.5273		0	200	1	41.591	1	20171202_10.RAW	1350.69
		FALSE	High		Sequest HT (AI2)	Unambiguous	[R].WLLEGELYNGR.[LV]		4	4	pcri_g8720.t1; pcri_g8718.t1; pcri_g8045.t1; pcri_g8716.t1	pcri_g8720.t1; pcri_g8718.t1; pcri_g8045.t1; pcri_g8716.t1	0	2	MS2	0.5055		0	200	1	50.4684	1	20171101_05.RAW	1351.38
		FALSE	High		Sequest HT (AL2)	Unambiguous	[R].WLLEGELYNGR.[LV]		4	4	pcri_g8720.t1; pcri_g8718.t1; pcri_g8045.t1; pcri_g8716.t1	pcri_g8720.t1; pcri_g8718.t1; pcri_g8045.t1; pcri_g8716.t1	0	2	MS2	0.541		0	200	1	50.6158	1	20171101_02.RAW	1350.33
		FALSE	High		Sequest HT (AG2)	Unambiguous	[R].WLLEGELYNGR.[LV]		4	4	pcri_g8720.t1; pcri_g8718.t1; pcri_g8045.t1; pcri_g8716.t1	pcri_g8720.t1; pcri_g8718.t1; pcri_g8045.t1; pcri_g8716.t1	0	2	MS2	0.4781		0	114.711	1	34.8453	1	20171101_07.RAW	1350.61
		FALSE	High		Sequest HT (AJ2)	Unambiguous	[R].WLLEGELYNGR.[LV]		4	4	pcri_g8720.t1; pcri_g8718.t1; pcri_g8045.t1; pcri_g8716.t1	pcri_g8720.t1; pcri_g8718.t1; pcri_g8045.t1; pcri_g8716.t1	0	2	MS2	0.5644		0	200	1	45.5126	1	20171101_04.RAW	1350.34
		FALSE	High		Sequest HT (Y2)	Unambiguous	[R].WLLEGELYNGR.[LV]		4	4	pcri_g8720.t1; pcri_g8718.t1; pcri_g8045.t1; pcri_g8716.t1	pcri_g8720.t1; pcri_g8718.t1; pcri_g8045.t1; pcri_g8716.t1	0	2	MS2	0.5829		0	200	1	52.1497	1	20171101_blank05.RAW	1350.21
		FALSE	High		Sequest HT (AI2)	Unambiguous	[R].WLLEGELYNGR.[LV]		4	4	pcri_g8720.t1; pcri_g8718.t1; pcri_g8045.t1; pcri_g8716.t1	pcri_g8720.t1; pcri_g8718.t1; pcri_g8045.t1; pcri_g8716.t1	0	2	MS2	0.5319		0	200	1	53.3675	1	20171101_05.RAW	1351.57
		FALSE	High		Sequest HT (AL2)	Unambiguous	[R].WLLEGELYNGR.[LV]		4	4	pcri_g8720.t1; pcri_g8718.t1; pcri_g8045.t1; pcri_g8716.t1	pcri_g8720.t1; pcri_g8718.t1; pcri_g8045.t1; pcri_g8716.t1	0	2	MS2	0.5014		0	200	1	45.7371	1	20171101_02.RAW	1350.51
		FALSE	High		Sequest HT (K2)	Unambiguous	[R].WLLEGELYNGR.[LV]		4	4	pcri_g8720.t1; pcri_g8718.t1; pcri_g8045.t1; pcri_g8716.t1	pcri_g8720.t1; pcri_g8718.t1; pcri_g8045.t1; pcri_g8716.t1	0	2	MS2	0.3482		0	81.273	1	32.272	1	20171202_10.RAW	1353.63
		FALSE	High		Sequest HT (AG2)	Unambiguous	[R].WLLEGELYNGR.[LV]		4	4	pcri_g8720.t1; pcri_g8718.t1; pcri_g8045.t1; pcri_g8716.t1	pcri_g8720.t1; pcri_g8718.t1; pcri_g8045.t1; pcri_g8716.t1	0	2	MS2	0.546		0	200	1	51.1083	1	20171101_07.RAW	1350.59
		FALSE	High		Sequest HT (AG2)	Unambiguous	[R].WLLEGELYNGR.[LV]		4	4	pcri_g8720.t1; pcri_g8718.t1; pcri_g8045.t1; pcri_g8716.t1	pcri_g8720.t1; pcri_g8718.t1; pcri_g8045.t1; pcri_g8716.t1	0	2	MS2	0.4944		0	200	1	59.868	1	20171101_07.RAW	1351
		FALSE	High		Sequest HT (S2)	Unambiguous	[R].WLLEGELYNGR.[LV]		4	4	pcri_g8720.t1; pcri_g8718.t1; pcri_g8045.t1; pcri_g8716.t1	pcri_g8720.t1; pcri_g8718.t1; pcri_g8045.t1; pcri_g8716.t1	0	2	MS2	0.567		0	200	1	33.5843	1	20171202_02.RAW	1350.48
		FALSE	High		Sequest HT (AJ2)	Unambiguous	[R].WLLEGELYNGR.[LV]		4	4	pcri_g8720.t1; pcri_g8718.t1; pcri_g8045.t1; pcri_g8716.t1	pcri_g8720.t1; pcri_g8718.t1; pcri_g8045.t1; pcri_g8716.t1	0	2	MS2	0.5251		0	200	1	52.2161	1	20171101_04.RAW	1350.41
		FALSE	High		Sequest HT (AJ2)	Unambiguous	[R].WLLEGELYNGR.[LV]		4	4	pcri_g8720.t1; pcri_g8718.t1; pcri_g8045.t1; pcri_g8716.t1	pcri_g8720.t1; pcri_g8718.t1; pcri_g8045.t1; pcri_g8716.t1	0	2	MS2	0.5182		0	200	1	55.0383	1	20171101_04.RAW	1350.48
		FALSE	High		Sequest HT (N2)	Unambiguous	[R].WLLEGELYNGR.[LV]		4	4	pcri_g8720.t1; pcri_g8718.t1; pcri_g8045.t1; pcri_g8716.t1	pcri_g8720.t1; pcri_g8718.t1; pcri_g8045.t1; pcri_g8716.t1	0	2	MS2	0.3585		0	200	1	32.0663	1	20171202_07.RAW	1353.46
		FALSE	High		Sequest HT (Y2)	Unambiguous	[R].WLLEGELYNGR.[LV]		4	4	pcri_g8720.t1; pcri_g8718.t1; pcri_g8045.t1; pcri_g8716.t1	pcri_g8720.t1; pcri_g8718.t1; pcri_g8045.t1; pcri_g8716.t1	0	2	MS2	0.4494		0	200	1	49.3232	1	20171101_blank05.RAW	1351.02
		FALSE	High		Sequest HT (AI2)	Unambiguous	[R].WLLEGELYNGR.[LV]		4	4	pcri_g8720.t1; pcri_g8718.t1; pcri_g8045.t1; pcri_g8716.t1	pcri_g8720.t1; pcri_g8718.t1; pcri_g8045.t1; pcri_g8716.t1	0	2	MS2	0.486		0	200	1	46.8873	1	20171101_05.RAW	1351.51
		FALSE	High		Sequest HT (AI2)	Unambiguous	[R].WLLEGELYNGR.[LV]		4	4	pcri_g8720.t1; pcri_g8718.t1; pcri_g8045.t1; pcri_g8716.t1	pcri_g8720.t1; pcri_g8718.t1; pcri_g8045.t1; pcri_g8716.t1	0	2	MS2	0.5424		0	200	1	51.0367	1	20171101_05.RAW	1350.07
		FALSE	High		Sequest HT (AI2)	Unambiguous	[R].WLLEGELYNGR.[LV]		4	4	pcri_g8720.t1; pcri_g8718.t1; pcri_g8045.t1; pcri_g8716.t1	pcri_g8720.t1; pcri_g8718.t1; pcri_g8045.t1; pcri_g8716.t1	0	2	MS2	0.5326		0	200	1	43.897	1	20171101_05.RAW	1350.68
		FALSE	High		Sequest HT (AD2)	Unambiguous	[R].WLLEGELYNGR.[LV]		4	4	pcri_g8720.t1; pcri_g8718.t1; pcri_g8045.t1; pcri_g8716.t1	pcri_g8720.t1; pcri_g8718.t1; pcri_g8045.t1; pcri_g8716.t1	0	2	MS2	0.4972		0	200	1	56.554	1	20171101_10.RAW	1350.49
		FALSE	High		Sequest HT (AI2)	Unambiguous	[R].WLLEGELYNGR.[LV]		4	4	pcri_g8720.t1; pcri_g8718.t1; pcri_g8045.t1; pcri_g8716.t1	pcri_g8720.t1; pcri_g8718.t1; pcri_g8045.t1; pcri_g8716.t1	0	2	MS2	0.49		0	200	1	47.4804	1	20171101_05.RAW	1350.57
		FALSE	High		Sequest HT (Y2)	Unambiguous	[R].WLLEGELYNGR.[LV]		4	4	pcri_g8720.t1; pcri_g8718.t1; pcri_g8045.t1; pcri_g8716.t1	pcri_g8720.t1; pcri_g8718.t1; pcri_g8045.t1; pcri_g8716.t1	0	2	MS2	0.5328		0	200	1	53.6679	1	20171101_blank05.RAW	1351.92
		FALSE	High		Sequest HT (AD2)	Unambiguous	[R].WLLEGELYNGR.[LV]		4	4	pcri_g8720.t1; pcri_g8718.t1; pcri_g8045.t1; pcri_g8716.t1	pcri_g8720.t1; pcri_g8718.t1; pcri_g8045.t1; pcri_g8716.t1	0	2	MS2	0.5086		0	200	1	41.1383	1	20171101_10.RAW	1349.97
		FALSE	High		Sequest HT (AH2)	Unambiguous	[R].WLLEGELYNGR.[LV]		4	4	pcri_g8720.t1; pcri_g8718.t1; pcri_g8045.t1; pcri_g8716.t1	pcri_g8720.t1; pcri_g8718.t1; pcri_g8045.t1; pcri_g8716.t1	0	2	MS2	0.51		0	200	1	34.3568	1	20171101_06.RAW	1350.28
		FALSE	High		Sequest HT (AL2)	Unambiguous	[R].WLLEGELYNGR.[LV]		4	4	pcri_g8720.t1; pcri_g8718.t1; pcri_g8045.t1; pcri_g8716.t1	pcri_g8720.t1; pcri_g8718.t1; pcri_g8045.t1; pcri_g8716.t1	0	2	MS2	0.4613		0	200	1	48.1687	1	20171101_02.RAW	1351.36
		FALSE	High		Sequest HT (AL2)	Unambiguous	[R].WLLEGELYNGR.[LV]		4	4	pcri_g8720.t1; pcri_g8718.t1; pcri_g8045.t1; pcri_g8716.t1	pcri_g8720.t1; pcri_g8718.t1; pcri_g8045.t1; pcri_g8716.t1	0	2	MS2	0.4682		0	200	1	44.252	1	20171101_02.RAW	1350.78
		FALSE	High		Sequest HT (AL2)	Unambiguous	[R].WLLEGELYNGR.[LV]		4	4	pcri_g8720.t1; pcri_g8718.t1; pcri_g8045.t1; pcri_g8716.t1	pcri_g8720.t1; pcri_g8718.t1; pcri_g8045.t1; pcri_g8716.t1	0	2	MS2	0.5159		0	200	1	58.5245	1	20171101_02.RAW	1350.58
		FALSE	High		Sequest HT (T2)	Unambiguous	[R].WLLEGELYNGR.[LV]		4	4	pcri_g8720.t1; pcri_g8718.t1; pcri_g8045.t1; pcri_g8716.t1	pcri_g8720.t1; pcri_g8718.t1; pcri_g8045.t1; pcri_g8716.t1	0	2	MS2	0.3681		0	200	1	32.2705	1	20171202_01.RAW	1353.33
		FALSE	High		Sequest HT (AA2)	Unambiguous	[R].WLLEGELYNGR.[LV]		4	4	pcri_g8720.t1; pcri_g8718.t1; pcri_g8045.t1; pcri_g8716.t1	pcri_g8720.t1; pcri_g8718.t1; pcri_g8045.t1; pcri_g8716.t1	0	2	MS2	0.4315		0	200	1	34.2053	1	20171101_blank03.RAW	1350.63
		FALSE	High		Sequest HT (AI2)	Unambiguous	[R].WLLEGELYNGR.[LV]		4	4	pcri_g8720.t1; pcri_g8718.t1; pcri_g8045.t1; pcri_g8716.t1	pcri_g8720.t1; pcri_g8718.t1; pcri_g8045.t1; pcri_g8716.t1	0	2	MS2	0.5409		0	200	1	37.7874	1	20171101_05.RAW	1350.4
		FALSE	High		Sequest HT (AJ2)	Unambiguous	[R].WLLEGELYNGR.[LV]		4	4	pcri_g8720.t1; pcri_g8718.t1; pcri_g8045.t1; pcri_g8716.t1	pcri_g8720.t1; pcri_g8718.t1; pcri_g8045.t1; pcri_g8716.t1	0	2	MS2	0.5263		0	200	1	38.4521	1	20171101_04.RAW	1350.06
		FALSE	High		Sequest HT (AI2)	Unambiguous	[R].WLLEGELYNGR.[LV]		4	4	pcri_g8720.t1; pcri_g8718.t1; pcri_g8045.t1; pcri_g8716.t1	pcri_g8720.t1; pcri_g8718.t1; pcri_g8045.t1; pcri_g8716.t1	0	2	MS2	0.4897		0	200	1	57.3494	1	20171101_05.RAW	1350.61
		FALSE	High		Sequest HT (AD2)	Unambiguous	[R].WLLEGELYNGR.[LV]		4	4	pcri_g8720.t1; pcri_g8718.t1; pcri_g8045.t1; pcri_g8716.t1	pcri_g8720.t1; pcri_g8718.t1; pcri_g8045.t1; pcri_g8716.t1	0	2	MS2	0.4721		0	200	1	53.5364	1	20171101_10.RAW	1350.55
		FALSE	High		Sequest HT (AL2)	Unambiguous	[R].WLLEGELYNGR.[LV]		4	4	pcri_g8720.t1; pcri_g8718.t1; pcri_g8045.t1; pcri_g8716.t1	pcri_g8720.t1; pcri_g8718.t1; pcri_g8045.t1; pcri_g8716.t1	0	2	MS2	0.5601		0	200	1	46.4586	1	20171101_02.RAW	1350.25
		FALSE	High		Sequest HT (AJ2)	Unambiguous	[R].WLLEGELYNGR.[LV]		4	4	pcri_g8720.t1; pcri_g8718.t1; pcri_g8045.t1; pcri_g8716.t1	pcri_g8720.t1; pcri_g8718.t1; pcri_g8045.t1; pcri_g8716.t1	0	2	MS2	0.5455		0	200	1	35.8544	1	20171101_04.RAW	1349.8
		FALSE	High		Sequest HT (AL2)	Unambiguous	[R].WLLEGELYNGR.[LV]		4	4	pcri_g8720.t1; pcri_g8718.t1; pcri_g8045.t1; pcri_g8716.t1	pcri_g8720.t1; pcri_g8718.t1; pcri_g8045.t1; pcri_g8716.t1	0	2	MS2	0.5634		0	200	1	57.3633	1	20171101_02.RAW	1350.11
		FALSE	High		Sequest HT (AI2)	Unambiguous	[R].WLLEGELYNGR.[LV]		4	4	pcri_g8720.t1; pcri_g8718.t1; pcri_g8045.t1; pcri_g8716.t1	pcri_g8720.t1; pcri_g8718.t1; pcri_g8045.t1; pcri_g8716.t1	0	2	MS2	0.5207		0	200	1	48.6388	1	20171101_05.RAW	1350.28
		FALSE	High		Sequest HT (AL2)	Unambiguous	[R].WLLEGELYNGR.[LV]		4	4	pcri_g8720.t1; pcri_g8718.t1; pcri_g8045.t1; pcri_g8716.t1	pcri_g8720.t1; pcri_g8718.t1; pcri_g8045.t1; pcri_g8716.t1	0	2	MS2	0.5118		0	200	1	59.2775	1	20171101_02.RAW	1350.16
		FALSE	High		Sequest HT (AI2)	Unambiguous	[R].WLLEGELYNGR.[LV]		4	4	pcri_g8720.t1; pcri_g8718.t1; pcri_g8045.t1; pcri_g8716.t1	pcri_g8720.t1; pcri_g8718.t1; pcri_g8045.t1; pcri_g8716.t1	0	2	MS2	0.4645		0	200	1	39.3511	1	20171101_05.RAW	1350.58
		FALSE	High		Sequest HT (AD2)	Unambiguous	[R].WLLEGELYNGR.[LV]		4	4	pcri_g8720.t1; pcri_g8718.t1; pcri_g8045.t1; pcri_g8716.t1	pcri_g8720.t1; pcri_g8718.t1; pcri_g8045.t1; pcri_g8716.t1	0	2	MS2	0.5193		0	200	1	49.8984	1	20171101_10.RAW	1350.22
		FALSE	High		Sequest HT (K2)	Unambiguous	[R].WLLEGELYNGR.[LV]		4	4	pcri_g8720.t1; pcri_g8718.t1; pcri_g8045.t1; pcri_g8716.t1	pcri_g8720.t1; pcri_g8718.t1; pcri_g8045.t1; pcri_g8716.t1	0	2	MS2	0.5519		0	200	1	57.9671	1	20171202_10.RAW	1351.73
		FALSE	High		Sequest HT (X2)	Unambiguous	[R].WLLEGELYNGR.[LV]		4	4	pcri_g8720.t1; pcri_g8718.t1; pcri_g8045.t1; pcri_g8716.t1	pcri_g8720.t1; pcri_g8718.t1; pcri_g8045.t1; pcri_g8716.t1	0	2	MS2	0.4718		0	200	1	34.4587	1	20171101_blank06.RAW	1350.48
		FALSE	High		Sequest HT (AJ2)	Unambiguous	[R].WLLEGELYNGR.[LV]		4	4	pcri_g8720.t1; pcri_g8718.t1; pcri_g8045.t1; pcri_g8716.t1	pcri_g8720.t1; pcri_g8718.t1; pcri_g8045.t1; pcri_g8716.t1	0	2	MS2	0.3798		0	200	1	56.697	1	20171101_04.RAW	1350.77
		FALSE	High		Sequest HT (AL2)	Unambiguous	[R].WLLEGELYNGR.[LV]		4	4	pcri_g8720.t1; pcri_g8718.t1; pcri_g8045.t1; pcri_g8716.t1	pcri_g8720.t1; pcri_g8718.t1; pcri_g8045.t1; pcri_g8716.t1	0	2	MS2	0.5433		0	200	1	51.1841	1	20171101_02.RAW	1350.55
		FALSE	High		Sequest HT (Y2)	Unambiguous	[R].WLLEGELYNGR.[LV]		4	4	pcri_g8720.t1; pcri_g8718.t1; pcri_g8045.t1; pcri_g8716.t1	pcri_g8720.t1; pcri_g8718.t1; pcri_g8045.t1; pcri_g8716.t1	0	2	MS2	0.4388		0	200	1	52.7075	1	20171101_blank05.RAW	1350.52
		FALSE	High		Sequest HT (AI2)	Unambiguous	[R].WLLEGELYNGR.[LV]		4	4	pcri_g8720.t1; pcri_g8718.t1; pcri_g8045.t1; pcri_g8716.t1	pcri_g8720.t1; pcri_g8718.t1; pcri_g8045.t1; pcri_g8716.t1	0	2	MS2	0.503		0	200	1	43.1652	1	20171101_05.RAW	1350.32
		FALSE	High		Sequest HT (AI2)	Unambiguous	[R].WLLEGELYNGR.[LV]		4	4	pcri_g8720.t1; pcri_g8718.t1; pcri_g8045.t1; pcri_g8716.t1	pcri_g8720.t1; pcri_g8718.t1; pcri_g8045.t1; pcri_g8716.t1	0	2	MS2	0.491		0	200	1	55.6527	1	20171101_05.RAW	1350.26
		FALSE	High		Sequest HT (AJ2)	Unambiguous	[R].WLLEGELYNGR.[LV]		4	4	pcri_g8720.t1; pcri_g8718.t1; pcri_g8045.t1; pcri_g8716.t1	pcri_g8720.t1; pcri_g8718.t1; pcri_g8045.t1; pcri_g8716.t1	0	2	MS2	0.4127		0	200	1	56.1474	1	20171101_04.RAW	1351.33
		FALSE	High		Sequest HT (AL2)	Unambiguous	[R].WLLEGELYNGR.[LV]		4	4	pcri_g8720.t1; pcri_g8718.t1; pcri_g8045.t1; pcri_g8716.t1	pcri_g8720.t1; pcri_g8718.t1; pcri_g8045.t1; pcri_g8716.t1	0	2	MS2	0.497		0	200	1	57.9659	1	20171101_02.RAW	1350.24
		FALSE	High		Sequest HT (AL2)	Unambiguous	[R].WLLEGELYNGR.[LV]		4	4	pcri_g8720.t1; pcri_g8718.t1; pcri_g8045.t1; pcri_g8716.t1	pcri_g8720.t1; pcri_g8718.t1; pcri_g8045.t1; pcri_g8716.t1	0	2	MS2	0.4036		0	200	1	48.7211	1	20171101_02.RAW	1351.14
		FALSE	High		Sequest HT (AL2)	Unambiguous	[R].WLLEGELYNGR.[LV]		4	4	pcri_g8720.t1; pcri_g8718.t1; pcri_g8045.t1; pcri_g8716.t1	pcri_g8720.t1; pcri_g8718.t1; pcri_g8045.t1; pcri_g8716.t1	0	2	MS2	0.4048		0	200	1	52.4687	1	20171101_02.RAW	1350.69
		FALSE	High		Sequest HT (AJ2)	Unambiguous	[R].WLLEGELYNGR.[LV]		4	4	pcri_g8720.t1; pcri_g8718.t1; pcri_g8045.t1; pcri_g8716.t1	pcri_g8720.t1; pcri_g8718.t1; pcri_g8045.t1; pcri_g8716.t1	0	2	MS2	0.4894		0	200	1	54.4902	1	20171101_04.RAW	1350.48
		FALSE	High		Sequest HT (AF2)	Unambiguous	[R].WLLEGELYNGR.[LV]		4	4	pcri_g8720.t1; pcri_g8718.t1; pcri_g8045.t1; pcri_g8716.t1	pcri_g8720.t1; pcri_g8718.t1; pcri_g8045.t1; pcri_g8716.t1	0	2	MS2	0.4772		0	200	1	59.0513	1	20171101_08.RAW	1351.42
		FALSE	High		Sequest HT (AL2)	Unambiguous	[R].WLLEGELYNGR.[LV]		4	4	pcri_g8720.t1; pcri_g8718.t1; pcri_g8045.t1; pcri_g8716.t1	pcri_g8720.t1; pcri_g8718.t1; pcri_g8045.t1; pcri_g8716.t1	0	2	MS2	0.5106		0	200	1	44.9587	1	20171101_02.RAW	1350
		FALSE	High		Sequest HT (AI2)	Unambiguous	[R].WLLEGELYNGR.[LV]		4	4	pcri_g8720.t1; pcri_g8718.t1; pcri_g8045.t1; pcri_g8716.t1	pcri_g8720.t1; pcri_g8718.t1; pcri_g8045.t1; pcri_g8716.t1	0	2	MS2	0.5653		0	200	1	48.076	1	20171101_05.RAW	1349.86
		FALSE	High		Sequest HT (AI2)	Unambiguous	[R].WLLEGELYNGR.[LV]		4	4	pcri_g8720.t1; pcri_g8718.t1; pcri_g8045.t1; pcri_g8716.t1	pcri_g8720.t1; pcri_g8718.t1; pcri_g8045.t1; pcri_g8716.t1	0	2	MS2	0.5745		0	200	1	51.5892	1	20171101_05.RAW	1349.92
		FALSE	High		Sequest HT (AF2)	Unambiguous	[R].WLLEGELYNGR.[LV]		4	4	pcri_g8720.t1; pcri_g8718.t1; pcri_g8045.t1; pcri_g8716.t1	pcri_g8720.t1; pcri_g8718.t1; pcri_g8045.t1; pcri_g8716.t1	0	2	MS2	0.465		0	200	1	57.5083	1	20171101_08.RAW	1349.92
		FALSE	High		Sequest HT (Y2)	Unambiguous	[R].WLLEGELYNGR.[LV]		4	4	pcri_g8720.t1; pcri_g8718.t1; pcri_g8045.t1; pcri_g8716.t1	pcri_g8720.t1; pcri_g8718.t1; pcri_g8045.t1; pcri_g8716.t1	0	2	MS2	0.5732		0	200	1	42.7013	1	20171101_blank05.RAW	1350.76
		FALSE	High		Sequest HT (AM2)	Unambiguous	[R].WLLEGELYNGR.[LV]		4	4	pcri_g8720.t1; pcri_g8718.t1; pcri_g8045.t1; pcri_g8716.t1	pcri_g8720.t1; pcri_g8718.t1; pcri_g8045.t1; pcri_g8716.t1	0	2	MS2	0.5549		0	200	1	52.3152	1	20171101_01.RAW	1350.48
		FALSE	High		Sequest HT (AJ2)	Unambiguous	[R].WLLEGELYNGR.[LV]		4	4	pcri_g8720.t1; pcri_g8718.t1; pcri_g8045.t1; pcri_g8716.t1	pcri_g8720.t1; pcri_g8718.t1; pcri_g8045.t1; pcri_g8716.t1	0	2	MS2	0.5535		0	200	1	42.899	1	20171101_04.RAW	1349.87
		FALSE	High		Sequest HT (AF2)	Unambiguous	[R].WLLEGELYNGR.[LV]		4	4	pcri_g8720.t1; pcri_g8718.t1; pcri_g8045.t1; pcri_g8716.t1	pcri_g8720.t1; pcri_g8718.t1; pcri_g8045.t1; pcri_g8716.t1	0	2	MS2	0.4202		0	200	1	56.851	1	20171101_08.RAW	1352.11
		FALSE	High		Sequest HT (AI2)	Unambiguous	[R].WLLEGELYNGR.[LV]		4	4	pcri_g8720.t1; pcri_g8718.t1; pcri_g8045.t1; pcri_g8716.t1	pcri_g8720.t1; pcri_g8718.t1; pcri_g8045.t1; pcri_g8716.t1	0	2	MS2	0.3098		0	200	1	34.1509	1	20171101_05.RAW	1353.62
		FALSE	High		Sequest HT (AB2)	Unambiguous	[R].WLLEGELYNGR.[LV]		4	4	pcri_g8720.t1; pcri_g8718.t1; pcri_g8045.t1; pcri_g8716.t1	pcri_g8720.t1; pcri_g8718.t1; pcri_g8045.t1; pcri_g8716.t1	0	2	MS2	0.5463		0	200	1	34.5186	1	20171101_blank02.RAW	1349.72
		FALSE	High		Sequest HT (AI2)	Unambiguous	[R].WLLEGELYNGR.[LV]		4	4	pcri_g8720.t1; pcri_g8718.t1; pcri_g8045.t1; pcri_g8716.t1	pcri_g8720.t1; pcri_g8718.t1; pcri_g8045.t1; pcri_g8716.t1	0	2	MS2	0.5216		0	200	1	59.1672	1	20171101_05.RAW	1350.49
		FALSE	High		Sequest HT (AI2)	Unambiguous	[R].WLLEGELYNGR.[LV]		4	4	pcri_g8720.t1; pcri_g8718.t1; pcri_g8045.t1; pcri_g8716.t1	pcri_g8720.t1; pcri_g8718.t1; pcri_g8045.t1; pcri_g8716.t1	0	2	MS2	0.534		0	200	1	34.0752	1	20171101_05.RAW	1349.53
		FALSE	High		Sequest HT (Y2)	Unambiguous	[R].WLLEGELYNGR.[LV]		4	4	pcri_g8720.t1; pcri_g8718.t1; pcri_g8045.t1; pcri_g8716.t1	pcri_g8720.t1; pcri_g8718.t1; pcri_g8045.t1; pcri_g8716.t1	0	2	MS2	0.5108		0	200	1	35.3204	1	20171101_blank05.RAW	1350.78
		FALSE	High		Sequest HT (AD2)	Unambiguous	[R].WLLEGELYNGR.[LV]		4	4	pcri_g8720.t1; pcri_g8718.t1; pcri_g8045.t1; pcri_g8716.t1	pcri_g8720.t1; pcri_g8718.t1; pcri_g8045.t1; pcri_g8716.t1	0	2	MS2	0.5759		0	200	1	57.1068	1	20171101_10.RAW	1349.59
		FALSE	High		Sequest HT (AI2)	Unambiguous	[R].WLLEGELYNGR.[LV]		4	4	pcri_g8720.t1; pcri_g8718.t1; pcri_g8045.t1; pcri_g8716.t1	pcri_g8720.t1; pcri_g8718.t1; pcri_g8045.t1; pcri_g8716.t1	0	2	MS2	0.4534		0	200	1	52.2228	1	20171101_05.RAW	1350.82
		FALSE	High		Sequest HT (AI2)	Unambiguous	[R].WLLEGELYNGR.[LV]		4	4	pcri_g8720.t1; pcri_g8718.t1; pcri_g8045.t1; pcri_g8716.t1	pcri_g8720.t1; pcri_g8718.t1; pcri_g8045.t1; pcri_g8716.t1	0	2	MS2	0.5248		0	200	1	53.9521	1	20171101_05.RAW	1349.43
		FALSE	High		Sequest HT (V2)	Unambiguous	[R].WLLEGELYNGR.[LV]		4	4	pcri_g8720.t1; pcri_g8718.t1; pcri_g8045.t1; pcri_g8716.t1	pcri_g8720.t1; pcri_g8718.t1; pcri_g8045.t1; pcri_g8716.t1	0	2	MS2	0.4611		0	200	1	50.6745	1	20171101_blank08.RAW	1350.36
		FALSE	High		Sequest HT (AL2)	Unambiguous	[R].WLLEGELYNGR.[LV]		4	4	pcri_g8720.t1; pcri_g8718.t1; pcri_g8045.t1; pcri_g8716.t1	pcri_g8720.t1; pcri_g8718.t1; pcri_g8045.t1; pcri_g8716.t1	0	2	MS2	0.5358		0	200	1	53.1406	1	20171101_02.RAW	1349.76
		FALSE	High		Sequest HT (AJ2)	Unambiguous	[R].WLLEGELYNGR.[LV]		4	4	pcri_g8720.t1; pcri_g8718.t1; pcri_g8045.t1; pcri_g8716.t1	pcri_g8720.t1; pcri_g8718.t1; pcri_g8045.t1; pcri_g8716.t1	0	2	MS2	0.4151		0	200	1	50.5172	1	20171101_04.RAW	1352.42
		FALSE	High		Sequest HT (Y2)	Unambiguous	[R].WLLEGELYNGR.[LV]		4	4	pcri_g8720.t1; pcri_g8718.t1; pcri_g8045.t1; pcri_g8716.t1	pcri_g8720.t1; pcri_g8718.t1; pcri_g8045.t1; pcri_g8716.t1	0	2	MS2	0.5047		0	200	1	55.1593	1	20171101_blank05.RAW	1350.52
		FALSE	High		Sequest HT (AL2)	Unambiguous	[R].WLLEGELYNGR.[LV]		4	4	pcri_g8720.t1; pcri_g8718.t1; pcri_g8045.t1; pcri_g8716.t1	pcri_g8720.t1; pcri_g8718.t1; pcri_g8045.t1; pcri_g8716.t1	0	2	MS2	0.5047		0	200	1	40.2524	1	20171101_02.RAW	1350.37
		FALSE	High		Sequest HT (AI2)	Unambiguous	[R].WLLEGELYNGR.[LV]		4	4	pcri_g8720.t1; pcri_g8718.t1; pcri_g8045.t1; pcri_g8716.t1	pcri_g8720.t1; pcri_g8718.t1; pcri_g8045.t1; pcri_g8716.t1	0	2	MS2	0.3956		0	200	1	54.5442	1	20171101_05.RAW	1351.32
		FALSE	High		Sequest HT (Y2)	Unambiguous	[R].WLLEGELYNGR.[LV]		4	4	pcri_g8720.t1; pcri_g8718.t1; pcri_g8045.t1; pcri_g8716.t1	pcri_g8720.t1; pcri_g8718.t1; pcri_g8045.t1; pcri_g8716.t1	0	2	MS2	0.519		0	200	1	51.4542	1	20171101_blank05.RAW	1350.31
		FALSE	High		Sequest HT (AI2)	Unambiguous	[R].WLLEGELYNGR.[LV]		4	4	pcri_g8720.t1; pcri_g8718.t1; pcri_g8045.t1; pcri_g8716.t1	pcri_g8720.t1; pcri_g8718.t1; pcri_g8045.t1; pcri_g8716.t1	0	2	MS2	0.5079		0	200	1	56.798	1	20171101_05.RAW	1349.86
		FALSE	High		Sequest HT (AM2)	Unambiguous	[R].WLLEGELYNGR.[LV]		4	4	pcri_g8720.t1; pcri_g8718.t1; pcri_g8045.t1; pcri_g8716.t1	pcri_g8720.t1; pcri_g8718.t1; pcri_g8045.t1; pcri_g8716.t1	0	2	MS2	0.465		0	200	1	59.3879	1	20171101_01.RAW	1350.77
		FALSE	High		Sequest HT (AI2)	Unambiguous	[R].WLLEGELYNGR.[LV]		4	4	pcri_g8720.t1; pcri_g8718.t1; pcri_g8045.t1; pcri_g8716.t1	pcri_g8720.t1; pcri_g8718.t1; pcri_g8045.t1; pcri_g8716.t1	0	2	MS2	0.5911		0	200	1	40.9799	1	20171101_05.RAW	1350.08
		FALSE	High		Sequest HT (AI2)	Unambiguous	[R].WLLEGELYNGR.[LV]		4	4	pcri_g8720.t1; pcri_g8718.t1; pcri_g8045.t1; pcri_g8716.t1	pcri_g8720.t1; pcri_g8718.t1; pcri_g8045.t1; pcri_g8716.t1	0	2	MS2	0.4231		0	200	1	49.2368	1	20171101_05.RAW	1349.96
		FALSE	High		Sequest HT (AL2)	Unambiguous	[R].WLLEGELYNGR.[LV]		4	4	pcri_g8720.t1; pcri_g8718.t1; pcri_g8045.t1; pcri_g8716.t1	pcri_g8720.t1; pcri_g8718.t1; pcri_g8045.t1; pcri_g8716.t1	0	2	MS2	0.4968		0	200	1	53.7656	1	20171101_02.RAW	1350.27
		FALSE	High		Sequest HT (M2)	Unambiguous	[R].WLLEGELYNGR.[LV]		4	4	pcri_g8720.t1; pcri_g8718.t1; pcri_g8045.t1; pcri_g8716.t1	pcri_g8720.t1; pcri_g8718.t1; pcri_g8045.t1; pcri_g8716.t1	0	2	MS2	0.4194		0	200	1	32.8844	1	20171202_08.RAW	1351.26
		FALSE	High		Sequest HT (AF2)	Unambiguous	[R].WLLEGELYNGR.[LV]		4	4	pcri_g8720.t1; pcri_g8718.t1; pcri_g8045.t1; pcri_g8716.t1	pcri_g8720.t1; pcri_g8718.t1; pcri_g8045.t1; pcri_g8716.t1	0	2	MS2	0.3871		0	200	1	50.9513	1	20171101_08.RAW	1351.45
		FALSE	High		Sequest HT (AI2)	Unambiguous	[R].WLLEGELYNGR.[LV]		4	4	pcri_g8720.t1; pcri_g8718.t1; pcri_g8045.t1; pcri_g8716.t1	pcri_g8720.t1; pcri_g8718.t1; pcri_g8045.t1; pcri_g8716.t1	0	2	MS2	0.5097		0	200	1	40.2575	1	20171101_05.RAW	1349.66
		FALSE	High		Sequest HT (P2)	Unambiguous	[R].WLLEGELYNGR.[LV]		4	4	pcri_g8720.t1; pcri_g8718.t1; pcri_g8045.t1; pcri_g8716.t1	pcri_g8720.t1; pcri_g8718.t1; pcri_g8045.t1; pcri_g8716.t1	0	2	MS2	0.3824		0	200	1	62.805	1	20171202_05.RAW	1351.35
		FALSE	High		Sequest HT (AF2)	Unambiguous	[R].WLLEGELYNGR.[LV]		4	4	pcri_g8720.t1; pcri_g8718.t1; pcri_g8045.t1; pcri_g8716.t1	pcri_g8720.t1; pcri_g8718.t1; pcri_g8045.t1; pcri_g8716.t1	0	2	MS2	0.5784		0	200	1	58.451	1	20171101_08.RAW	1350.35
		FALSE	High		Sequest HT (Y2)	Unambiguous	[R].WLLEGELYNGR.[LV]		4	4	pcri_g8720.t1; pcri_g8718.t1; pcri_g8045.t1; pcri_g8716.t1	pcri_g8720.t1; pcri_g8718.t1; pcri_g8045.t1; pcri_g8716.t1	0	2	MS2	0.5344		0	200	1	47.3823	1	20171101_blank05.RAW	1350.63
		FALSE	High		Sequest HT (AL2)	Unambiguous	[R].WLLEGELYNGR.[LV]		4	4	pcri_g8720.t1; pcri_g8718.t1; pcri_g8045.t1; pcri_g8716.t1	pcri_g8720.t1; pcri_g8718.t1; pcri_g8045.t1; pcri_g8716.t1	0	2	MS2	0.5428		0	200	1	50.0598	1	20171101_02.RAW	1350.49
		FALSE	High		Sequest HT (Y2)	Unambiguous	[R].WLLEGELYNGR.[LV]		4	4	pcri_g8720.t1; pcri_g8718.t1; pcri_g8045.t1; pcri_g8716.t1	pcri_g8720.t1; pcri_g8718.t1; pcri_g8045.t1; pcri_g8716.t1	0	2	MS2	0.5083		0	200	1	48.5916	1	20171101_blank05.RAW	1350.82
		FALSE	High		Sequest HT (AL2)	Unambiguous	[R].WLLEGELYNGR.[LV]		4	4	pcri_g8720.t1; pcri_g8718.t1; pcri_g8045.t1; pcri_g8716.t1	pcri_g8720.t1; pcri_g8718.t1; pcri_g8045.t1; pcri_g8716.t1	0	2	MS2	0.2591		0	200	1	34.1329	1	20171101_02.RAW	1353.53
		FALSE	High		Sequest HT (P2)	Unambiguous	[R].WLLEGELYNGR.[LV]		4	4	pcri_g8720.t1; pcri_g8718.t1; pcri_g8045.t1; pcri_g8716.t1	pcri_g8720.t1; pcri_g8718.t1; pcri_g8045.t1; pcri_g8716.t1	0	2	MS2	0.3654		0	200	1	53.2628	1	20171202_05.RAW	1350.62
		FALSE	High		Sequest HT (Y2)	Unambiguous	[R].WLLEGELYNGR.[LV]		4	4	pcri_g8720.t1; pcri_g8718.t1; pcri_g8045.t1; pcri_g8716.t1	pcri_g8720.t1; pcri_g8718.t1; pcri_g8045.t1; pcri_g8716.t1	0	2	MS2	0.5724		0	200	1	50.5789	1	20171101_blank05.RAW	1350.26
		FALSE	High		Sequest HT (Q2)	Unambiguous	[R].WLLEGELYNGR.[LV]		4	4	pcri_g8720.t1; pcri_g8718.t1; pcri_g8045.t1; pcri_g8716.t1	pcri_g8720.t1; pcri_g8718.t1; pcri_g8045.t1; pcri_g8716.t1	0	1	MS2	0.4358		0	197.826	1	32.2713	1	20171202_04.RAW	1350.78
		FALSE	High		Sequest HT (AK2)	Unambiguous	[R].WLLEGELYNGR.[LV]		4	4	pcri_g8720.t1; pcri_g8718.t1; pcri_g8045.t1; pcri_g8716.t1	pcri_g8720.t1; pcri_g8718.t1; pcri_g8045.t1; pcri_g8716.t1	0	2	MS2	0.4628		0	200	1	49.6388	1	20171101_03.RAW	1350.8
		FALSE	High		Sequest HT (AF2)	Unambiguous	[R].WLLEGELYNGR.[LV]		4	4	pcri_g8720.t1; pcri_g8718.t1; pcri_g8045.t1; pcri_g8716.t1	pcri_g8720.t1; pcri_g8718.t1; pcri_g8045.t1; pcri_g8716.t1	0	2	MS2	0.522		0	200	1	44.4962	1	20171101_08.RAW	1351.07
		FALSE	High		Sequest HT (Y2)	Unambiguous	[R].WLLEGELYNGR.[LV]		4	4	pcri_g8720.t1; pcri_g8718.t1; pcri_g8045.t1; pcri_g8716.t1	pcri_g8720.t1; pcri_g8718.t1; pcri_g8045.t1; pcri_g8716.t1	0	2	MS2	0.5612		0	200	1	42.053	1	20171101_blank05.RAW	1350.23
		FALSE	High		Sequest HT (P2)	Unambiguous	[R].WLLEGELYNGR.[LV]		4	4	pcri_g8720.t1; pcri_g8718.t1; pcri_g8045.t1; pcri_g8716.t1	pcri_g8720.t1; pcri_g8718.t1; pcri_g8045.t1; pcri_g8716.t1	0	2	MS2	0.4642		0	200	1	52.328	1	20171202_05.RAW	1349.67
		FALSE	High		Sequest HT (P2)	Unambiguous	[R].WLLEGELYNGR.[LV]		4	4	pcri_g8720.t1; pcri_g8718.t1; pcri_g8045.t1; pcri_g8716.t1	pcri_g8720.t1; pcri_g8718.t1; pcri_g8045.t1; pcri_g8716.t1	0	2	MS2	0.476		0	200	1	60.6425	1	20171202_05.RAW	1350.01
		FALSE	High		Sequest HT (AF2)	Unambiguous	[R].WLLEGELYNGR.[LV]		4	4	pcri_g8720.t1; pcri_g8718.t1; pcri_g8045.t1; pcri_g8716.t1	pcri_g8720.t1; pcri_g8718.t1; pcri_g8045.t1; pcri_g8716.t1	0	2	MS2	0.3655		0	200	1	53.8794	1	20171101_08.RAW	1351.77
		FALSE	High		Sequest HT (Y2)	Unambiguous	[R].WLLEGELYNGR.[LV]		4	4	pcri_g8720.t1; pcri_g8718.t1; pcri_g8045.t1; pcri_g8716.t1	pcri_g8720.t1; pcri_g8718.t1; pcri_g8045.t1; pcri_g8716.t1	0	2	MS2	0.4637		0	200	1	49.9783	1	20171101_blank05.RAW	1350.71
		FALSE	High		Sequest HT (AF2)	Unambiguous	[R].WLLEGELYNGR.[LV]		4	4	pcri_g8720.t1; pcri_g8718.t1; pcri_g8045.t1; pcri_g8716.t1	pcri_g8720.t1; pcri_g8718.t1; pcri_g8045.t1; pcri_g8716.t1	0	2	MS2	0.4301		0	200	1	49.9231	1	20171101_08.RAW	1350.58
		FALSE	High		Sequest HT (AF2)	Unambiguous	[R].WLLEGELYNGR.[LV]		4	4	pcri_g8720.t1; pcri_g8718.t1; pcri_g8045.t1; pcri_g8716.t1	pcri_g8720.t1; pcri_g8718.t1; pcri_g8045.t1; pcri_g8716.t1	0	2	MS2	0.3776		0	200	1	36.9338	1	20171101_08.RAW	1350.92
		FALSE	High		Sequest HT (V2)	Unambiguous	[R].WLLEGELYNGR.[LV]		4	4	pcri_g8720.t1; pcri_g8718.t1; pcri_g8045.t1; pcri_g8716.t1	pcri_g8720.t1; pcri_g8718.t1; pcri_g8045.t1; pcri_g8716.t1	0	2	MS2	0.4947		0	200	1	55.3139	1	20171101_blank08.RAW	1350.57
		FALSE	High		Sequest HT (K2)	Unambiguous	[R].WLLEGELYNGR.[LV]		4	4	pcri_g8720.t1; pcri_g8718.t1; pcri_g8045.t1; pcri_g8716.t1	pcri_g8720.t1; pcri_g8718.t1; pcri_g8045.t1; pcri_g8716.t1	0	1	MS2	0.4498		0	200	1	32.3667	1	20171202_10.RAW	1350.76
		FALSE	High		Sequest HT (V2)	Unambiguous	[R].WLLEGELYNGR.[LV]		4	4	pcri_g8720.t1; pcri_g8718.t1; pcri_g8045.t1; pcri_g8716.t1	pcri_g8720.t1; pcri_g8718.t1; pcri_g8045.t1; pcri_g8716.t1	0	2	MS2	0.4275		0	200	1	52.7753	1	20171101_blank08.RAW	1350.2
		FALSE	High		Sequest HT (Z2)	Unambiguous	[R].WLLEGELYNGR.[LV]		4	4	pcri_g8720.t1; pcri_g8718.t1; pcri_g8045.t1; pcri_g8716.t1	pcri_g8720.t1; pcri_g8718.t1; pcri_g8045.t1; pcri_g8716.t1	0	2	MS2	0.4627		0	200	1	34.5668	1	20171101_blank04.RAW	1350.7
		FALSE	High		Sequest HT (AJ2)	Unambiguous	[R].WLLEGELYNGR.[LV]		4	4	pcri_g8720.t1; pcri_g8718.t1; pcri_g8045.t1; pcri_g8716.t1	pcri_g8720.t1; pcri_g8718.t1; pcri_g8045.t1; pcri_g8716.t1	0	1	MS2	0.38		0	200	1	34.284	1	20171101_04.RAW	1350.87
		FALSE	High		Sequest HT (V2)	Unambiguous	[R].WLLEGELYNGR.[LV]		4	4	pcri_g8720.t1; pcri_g8718.t1; pcri_g8045.t1; pcri_g8716.t1	pcri_g8720.t1; pcri_g8718.t1; pcri_g8045.t1; pcri_g8716.t1	0	2	MS2	0.3976		0	200	1	48.8721	1	20171101_blank08.RAW	1349.95
		FALSE	High		Sequest HT (AA2)	Unambiguous	[R].WLLEGELYNGR.[LV]		4	4	pcri_g8720.t1; pcri_g8718.t1; pcri_g8045.t1; pcri_g8716.t1	pcri_g8720.t1; pcri_g8718.t1; pcri_g8045.t1; pcri_g8716.t1	0	2	MS2	0.4573		0	200	1	55.4043	1	20171101_blank03.RAW	1349.8
		FALSE	High		Sequest HT (AF2)	Unambiguous	[R].WLLEGELYNGR.[LV]		4	4	pcri_g8720.t1; pcri_g8718.t1; pcri_g8045.t1; pcri_g8716.t1	pcri_g8720.t1; pcri_g8718.t1; pcri_g8045.t1; pcri_g8716.t1	0	1	MS2	0.2547		0	200	1	34.5662	1	20171101_08.RAW	1350.75
	FALSE	High	[R].VAMLAVVGVLTVEAQGK.[G]				2	2	30	pcri_g8718.t1; pcri_g8716.t1	pcri_g8718.t1 pcri_g8716.t1	pcri_g8718.t1 [130-146]; pcri_g8716.t1 [130-146]	0	1684.97	Not Found	Not Found	Not Found	Not Found	Not Found	Not Found	Not Found	High	Not Found	Not Found	Not Found	Not Found	Not Found	Not Found	Not Found	Not Found	Not Found	High	Not Found	Not Found	Not Found	High	5.78	R.VAMLAVVGVLTVEAQGK.G	[130-146]
		Checked	Confidence		Identifying Node	PSM Ambiguity	Annotated Sequence	Modifications	# Protein Groups	# Proteins	Master Protein Accessions	Protein Accessions	# Missed Cleavages	Charge	MS Order	DeltaScore	Isolation Interference [%]	DeltaCn	Ion Inject Time [ms]	Rank	RT [min]	Search Engine Rank	Spectrum File	MH+ [Da]
		FALSE	High		Sequest HT (Y2)	Unambiguous	[R].VAMLAVVGVLTVEAQGK.[G]		2	2	pcri_g8718.t1; pcri_g8716.t1	pcri_g8718.t1; pcri_g8716.t1	0	3	MS2	0.4792		0	200	1	39.7721	1	20171101_blank05.RAW	1689.62
		FALSE	High		Sequest HT (AJ2)	Unambiguous	[R].VAMLAVVGVLTVEAQGK.[G]		2	2	pcri_g8718.t1; pcri_g8716.t1	pcri_g8718.t1; pcri_g8716.t1	0	3	MS2	0.5775		0	200	1	41.7605	1	20171101_04.RAW	1688.61
		FALSE	High		Sequest HT (AE2)	Unambiguous	[R].VAMLAVVGVLTVEAQGK.[G]		2	2	pcri_g8718.t1; pcri_g8716.t1	pcri_g8718.t1; pcri_g8716.t1	0	3	MS2	0.5422		0	200	1	39.6801	1	20171101_09.RAW	1687.31
		FALSE	High		Sequest HT (P2)	Unambiguous	[R].VAMLAVVGVLTVEAQGK.[G]		2	2	pcri_g8718.t1; pcri_g8716.t1	pcri_g8718.t1; pcri_g8716.t1	0	2	MS2	0.5605		0	200	1	39.0344	1	20171202_05.RAW	1687.37
		FALSE	High		Sequest HT (AG2)	Unambiguous	[R].VAMLAVVGVLTVEAQGK.[G]		2	2	pcri_g8718.t1; pcri_g8716.t1	pcri_g8718.t1; pcri_g8716.t1	0	2	MS2	0.552		0	200	1	39.6255	1	20171101_07.RAW	1688.34
		FALSE	High		Sequest HT (Q2)	Unambiguous	[R].VAMLAVVGVLTVEAQGK.[G]		2	2	pcri_g8718.t1; pcri_g8716.t1	pcri_g8718.t1; pcri_g8716.t1	0	2	MS2	0.4716		0	200	1	38.7192	1	20171202_04.RAW	1686.48
		FALSE	High		Sequest HT (Y2)	Unambiguous	[R].VAMLAVVGVLTVEAQGK.[G]		2	2	pcri_g8718.t1; pcri_g8716.t1	pcri_g8718.t1; pcri_g8716.t1	0	2	MS2	0.588		0	200	1	39.5768	1	20171101_blank05.RAW	1685.5
		FALSE	High		Sequest HT (AD2)	Unambiguous	[R].VAMLAVVGVLTVEAQGK.[G]		2	2	pcri_g8718.t1; pcri_g8716.t1	pcri_g8718.t1; pcri_g8716.t1	0	2	MS2	0.5282		0	200	1	39.5808	1	20171101_10.RAW	1688.75
		FALSE	High		Sequest HT (K2)	Unambiguous	[R].VAMLAVVGVLTVEAQGK.[G]		2	2	pcri_g8718.t1; pcri_g8716.t1	pcri_g8718.t1; pcri_g8716.t1	0	2	MS2	0.4447		0	200	1	38.5513	1	20171202_10.RAW	1686.65
		FALSE	High		Sequest HT (AJ2)	Unambiguous	[R].VAMLAVVGVLTVEAQGK.[G]		2	2	pcri_g8718.t1; pcri_g8716.t1	pcri_g8718.t1; pcri_g8716.t1	0	2	MS2	0.6043		0	200	1	39.5067	1	20171101_04.RAW	1685.52
		FALSE	High		Sequest HT (AD2)	Unambiguous	[R].VAMLAVVGVLTVEAQGK.[G]		2	2	pcri_g8718.t1; pcri_g8716.t1	pcri_g8718.t1; pcri_g8716.t1	0	2	MS2	0.6014		0	200	1	39.5265	1	20171101_10.RAW	1685.53
		FALSE	High		Sequest HT (Q2)	Unambiguous	[R].VAMLAVVGVLTVEAQGK.[G]		2	2	pcri_g8718.t1; pcri_g8716.t1	pcri_g8718.t1; pcri_g8716.t1	0	2	MS2	0.5096		0	200	1	41.1076	1	20171202_04.RAW	1686.38
		FALSE	High		Sequest HT (AJ2)	Unambiguous	[R].VAMLAVVGVLTVEAQGK.[G]		2	2	pcri_g8718.t1; pcri_g8716.t1	pcri_g8718.t1; pcri_g8716.t1	0	2	MS2	0.5962		0	200	1	40.057	1	20171101_04.RAW	1686.71
		FALSE	High		Sequest HT (Y2)	Unambiguous	[R].VAMLAVVGVLTVEAQGK.[G]		2	2	pcri_g8718.t1; pcri_g8716.t1	pcri_g8718.t1; pcri_g8716.t1	0	3	MS2	0.6102		0	200	1	39.6963	1	20171101_blank05.RAW	1684.99
		FALSE	High		Sequest HT (K2)	Unambiguous	[R].VAMLAVVGVLTVEAQGK.[G]		2	2	pcri_g8718.t1; pcri_g8716.t1	pcri_g8718.t1; pcri_g8716.t1	0	2	MS2	0.569		0	200	1	39.1055	1	20171202_10.RAW	1685.54
		FALSE	High		Sequest HT (M2)	Unambiguous	[R].VAMLAVVGVLTVEAQGK.[G]		2	2	pcri_g8718.t1; pcri_g8716.t1	pcri_g8718.t1; pcri_g8716.t1	0	3	MS2	0.545		0	200	1	38.9412	1	20171202_08.RAW	1686.58
		FALSE	High		Sequest HT (V2)	Unambiguous	[R].VAMLAVVGVLTVEAQGK.[G]		2	2	pcri_g8718.t1; pcri_g8716.t1	pcri_g8718.t1; pcri_g8716.t1	0	2	MS2	0.576		0	200	1	39.7627	1	20171101_blank08.RAW	1685.71
		FALSE	High		Sequest HT (AI2)	Unambiguous	[R].VAMLAVVGVLTVEAQGK.[G]		2	2	pcri_g8718.t1; pcri_g8716.t1	pcri_g8718.t1; pcri_g8716.t1	0	2	MS2	0.5775		0	200	1	39.4582	1	20171101_05.RAW	1685.81
		FALSE	High		Sequest HT (AJ2)	Unambiguous	[R].VAMLAVVGVLTVEAQGK.[G]		2	2	pcri_g8718.t1; pcri_g8716.t1	pcri_g8718.t1; pcri_g8716.t1	0	3	MS2	0.5539		0	200	1	56.7184	1	20171101_04.RAW	1686.09
		FALSE	High		Sequest HT (AG2)	Unambiguous	[R].VAMLAVVGVLTVEAQGK.[G]		2	2	pcri_g8718.t1; pcri_g8716.t1	pcri_g8718.t1; pcri_g8716.t1	0	2	MS2	0.6193		0	200	1	39.5388	1	20171101_07.RAW	1685.28
		FALSE	High		Sequest HT (AF2)	Unambiguous	[R].VAMLAVVGVLTVEAQGK.[G]		2	2	pcri_g8718.t1; pcri_g8716.t1	pcri_g8718.t1; pcri_g8716.t1	0	2	MS2	0.599		0	200	1	39.5545	1	20171101_08.RAW	1685.89
		FALSE	High		Sequest HT (Q2)	Unambiguous	[R].VAMLAVVGVLTVEAQGK.[G]		2	2	pcri_g8718.t1; pcri_g8716.t1	pcri_g8718.t1; pcri_g8716.t1	0	2	MS2	0.5538		0	200	1	39.3283	1	20171202_04.RAW	1685.67
		FALSE	High		Sequest HT (V2)	Unambiguous	[R].VAMLAVVGVLTVEAQGK.[G]		2	2	pcri_g8718.t1; pcri_g8716.t1	pcri_g8718.t1; pcri_g8716.t1	0	3	MS2	0.4244		0	200	1	39.9917	1	20171101_blank08.RAW	1689.54
		FALSE	High		Sequest HT (V2)	Unambiguous	[R].VAMLAVVGVLTVEAQGK.[G]		2	2	pcri_g8718.t1; pcri_g8716.t1	pcri_g8718.t1; pcri_g8716.t1	0	3	MS2	0.5544		0	200	1	39.7523	1	20171101_blank08.RAW	1684.87
		FALSE	High		Sequest HT (AI2)	Unambiguous	[R].VAMLAVVGVLTVEAQGK.[G]		2	2	pcri_g8718.t1; pcri_g8716.t1	pcri_g8718.t1; pcri_g8716.t1	0	3	MS2	0.5676		0	200	1	39.4373	1	20171101_05.RAW	1686.17
		FALSE	High		Sequest HT (AJ2)	Unambiguous	[R].VAMLAVVGVLTVEAQGK.[G]		2	2	pcri_g8718.t1; pcri_g8716.t1	pcri_g8718.t1; pcri_g8716.t1	0	3	MS2	0.4836		0	200	1	46.5563	1	20171101_04.RAW	1686.3
		FALSE	High		Sequest HT (M2)	Unambiguous	[R].VAMLAVVGVLTVEAQGK.[G]		2	2	pcri_g8718.t1; pcri_g8716.t1	pcri_g8718.t1; pcri_g8716.t1	0	2	MS2	0.5417		0	200	1	38.9516	1	20171202_08.RAW	1685.63
		FALSE	High		Sequest HT (AJ2)	Unambiguous	[R].VAMLAVVGVLTVEAQGK.[G]		2	2	pcri_g8718.t1; pcri_g8716.t1	pcri_g8718.t1; pcri_g8716.t1	0	2	MS2	0.5465		0	200	1	41.4377	1	20171101_04.RAW	1685.82
		FALSE	High		Sequest HT (AJ2)	Unambiguous	[R].VAMLAVVGVLTVEAQGK.[G]		2	2	pcri_g8718.t1; pcri_g8716.t1	pcri_g8718.t1; pcri_g8716.t1	0	2	MS2	0.5972		0	200	1	49.1174	1	20171101_04.RAW	1685.19
		FALSE	High		Sequest HT (N2)	Unambiguous	[R].VAMLAVVGVLTVEAQGK.[G]		2	2	pcri_g8718.t1; pcri_g8716.t1	pcri_g8718.t1; pcri_g8716.t1	0	2	MS2	0.6		0	200	1	38.9184	1	20171202_07.RAW	1685.39
	FALSE	High	[R].ETGQAGHFGAAR.[F]				2	2	31	pcri_g8718.t1; pcri_g8716.t1	pcri_g8718.t1 pcri_g8716.t1	pcri_g8718.t1 [187-198]; pcri_g8716.t1 [187-198]	0	1201.57	Not Found	Not Found	Not Found	High	Not Found	High	Not Found	High	Not Found	Not Found	Not Found	High	Not Found	High	Not Found	High	Not Found	High	High	Not Found	Not Found	High	3.59	R.ETGQAGHFGAAR.F	[187-198]
		Checked	Confidence		Identifying Node	PSM Ambiguity	Annotated Sequence	Modifications	# Protein Groups	# Proteins	Master Protein Accessions	Protein Accessions	# Missed Cleavages	Charge	MS Order	DeltaScore	Isolation Interference [%]	DeltaCn	Ion Inject Time [ms]	Rank	RT [min]	Search Engine Rank	Spectrum File	MH+ [Da]
		FALSE	High		Sequest HT (S2)	Rejected	[R].ETGQAGHFGAAR.[F]		2	2	pcri_g8718.t1; pcri_g8716.t1	pcri_g8718.t1; pcri_g8716.t1	0	2	MS2	0.0223		0	200	1	19.3474	1	20171202_02.RAW	1202.87
		FALSE	High		Sequest HT (AD2)	Unambiguous	[R].ETGQAGHFGAAR.[F]		2	2	pcri_g8718.t1; pcri_g8716.t1	pcri_g8718.t1; pcri_g8716.t1	0	2	MS2	0.2735		0	176.192	1	18.4164	1	20171101_10.RAW	1202.17
		FALSE	High		Sequest HT (AI2)	Unambiguous	[R].ETGQAGHFGAAR.[F]		2	2	pcri_g8718.t1; pcri_g8716.t1	pcri_g8718.t1; pcri_g8716.t1	0	2	MS2	0.2232		0	52.584	1	17.1417	1	20171101_05.RAW	1203.13
		FALSE	High		Sequest HT (R2)	Unambiguous	[R].ETGQAGHFGAAR.[F]		2	2	pcri_g8718.t1; pcri_g8716.t1	pcri_g8718.t1; pcri_g8716.t1	0	2	MS2	0.186		0	200	1	13.4648	1	20171202_03.RAW	1202.39
		FALSE	High		Sequest HT (AD2)	Unambiguous	[R].ETGQAGHFGAAR.[F]		2	2	pcri_g8718.t1; pcri_g8716.t1	pcri_g8718.t1; pcri_g8716.t1	0	2	MS2	0.276		0	200	1	20.0603	1	20171101_10.RAW	1202.39
		FALSE	High		Sequest HT (AJ2)	Unambiguous	[R].ETGQAGHFGAAR.[F]		2	2	pcri_g8718.t1; pcri_g8716.t1	pcri_g8718.t1; pcri_g8716.t1	0	2	MS2	0.2636		0	73.131	1	17.713	1	20171101_04.RAW	1202.48
		FALSE	High		Sequest HT (AJ2)	Unambiguous	[R].ETGQAGHFGAAR.[F]		2	2	pcri_g8718.t1; pcri_g8716.t1	pcri_g8718.t1; pcri_g8716.t1	0	2	MS2	0.2219		0	69.609	1	17.1725	1	20171101_04.RAW	1203.38
		FALSE	High		Sequest HT (AI2)	Unambiguous	[R].ETGQAGHFGAAR.[F]		2	2	pcri_g8718.t1; pcri_g8716.t1	pcri_g8718.t1; pcri_g8716.t1	0	2	MS2	0.2416		0	200	1	20.4338	1	20171101_05.RAW	1202.4
		FALSE	High		Sequest HT (AI2)	Unambiguous	[R].ETGQAGHFGAAR.[F]		2	2	pcri_g8718.t1; pcri_g8716.t1	pcri_g8718.t1; pcri_g8716.t1	0	2	MS2	0.2669		0	200	1	18.7838	1	20171101_05.RAW	1202.23
		FALSE	High		Sequest HT (AD2)	Unambiguous	[R].ETGQAGHFGAAR.[F]		2	2	pcri_g8718.t1; pcri_g8716.t1	pcri_g8718.t1; pcri_g8716.t1	0	2	MS2	0.1969		0	29.883	1	16.7778	1	20171101_10.RAW	1202.25
		FALSE	High		Sequest HT (AJ2)	Unambiguous	[R].ETGQAGHFGAAR.[F]		2	2	pcri_g8718.t1; pcri_g8716.t1	pcri_g8718.t1; pcri_g8716.t1	0	2	MS2	0.284		0	200	1	29.1465	1	20171101_04.RAW	1202.05
		FALSE	High		Sequest HT (AI2)	Unambiguous	[R].ETGQAGHFGAAR.[F]		2	2	pcri_g8718.t1; pcri_g8716.t1	pcri_g8718.t1; pcri_g8716.t1	0	2	MS2	0.2407		0	200	1	19.8771	1	20171101_05.RAW	1202.3
		FALSE	High		Sequest HT (AI2)	Unambiguous	[R].ETGQAGHFGAAR.[F]		2	2	pcri_g8718.t1; pcri_g8716.t1	pcri_g8718.t1; pcri_g8716.t1	0	2	MS2	0.2477		0	200	1	19.3312	1	20171101_05.RAW	1202.14
		FALSE	High		Sequest HT (AD2)	Unambiguous	[R].ETGQAGHFGAAR.[F]		2	2	pcri_g8718.t1; pcri_g8716.t1	pcri_g8718.t1; pcri_g8716.t1	0	2	MS2	0.1838		0	200	1	28.8124	1	20171101_10.RAW	1202.23
		FALSE	High		Sequest HT (AI2)	Unambiguous	[R].ETGQAGHFGAAR.[F]		2	2	pcri_g8718.t1; pcri_g8716.t1	pcri_g8718.t1; pcri_g8716.t1	0	2	MS2	0.1719		0	200	1	20.9792	1	20171101_05.RAW	1202.58
		FALSE	High		Sequest HT (P2)	Unambiguous	[R].ETGQAGHFGAAR.[F]		2	2	pcri_g8718.t1; pcri_g8716.t1	pcri_g8718.t1; pcri_g8716.t1	0	2	MS2	0.146		0	200	1	14.6081	1	20171202_05.RAW	1202.3
		FALSE	High		Sequest HT (AI2)	Unambiguous	[R].ETGQAGHFGAAR.[F]		2	2	pcri_g8718.t1; pcri_g8716.t1	pcri_g8718.t1; pcri_g8716.t1	0	2	MS2	0.2286		0	200	1	21.5484	1	20171101_05.RAW	1201.96
		FALSE	High		Sequest HT (AL2)	Unambiguous	[R].ETGQAGHFGAAR.[F]		2	2	pcri_g8718.t1; pcri_g8716.t1	pcri_g8718.t1; pcri_g8716.t1	0	2	MS2	0.2468		0	200	1	17.4418	1	20171101_02.RAW	1202.59
		FALSE	High		Sequest HT (AI2)	Unambiguous	[R].ETGQAGHFGAAR.[F]		2	2	pcri_g8718.t1; pcri_g8716.t1	pcri_g8718.t1; pcri_g8716.t1	0	2	MS2	0.2233		0	200	1	18.237	1	20171101_05.RAW	1202.34
		FALSE	High		Sequest HT (AF2)	Unambiguous	[R].ETGQAGHFGAAR.[F]		2	2	pcri_g8718.t1; pcri_g8716.t1	pcri_g8718.t1; pcri_g8716.t1	0	2	MS2	0.2704		0	200	1	18.0607	1	20171101_08.RAW	1201.84
		FALSE	High		Sequest HT (AK2)	Unambiguous	[R].ETGQAGHFGAAR.[F]		2	2	pcri_g8718.t1; pcri_g8716.t1	pcri_g8718.t1; pcri_g8716.t1	0	2	MS2	0.2593		0	200	1	18.0896	1	20171101_03.RAW	1202.37
		FALSE	High		Sequest HT (T2)	Unambiguous	[R].ETGQAGHFGAAR.[F]		2	2	pcri_g8718.t1; pcri_g8716.t1	pcri_g8718.t1; pcri_g8716.t1	0	2	MS2	0.1453		0	200	1	13.8686	1	20171202_01.RAW	1202.29
		FALSE	High		Sequest HT (P2)	Unambiguous	[R].ETGQAGHFGAAR.[F]		2	2	pcri_g8718.t1; pcri_g8716.t1	pcri_g8718.t1; pcri_g8716.t1	0	2	MS2	0.273		0	200	1	13.5127	1	20171202_05.RAW	1202.09
		FALSE	High		Sequest HT (E2)	Unambiguous	[R].ETGQAGHFGAAR.[F]		2	2	pcri_g8718.t1; pcri_g8716.t1	pcri_g8718.t1; pcri_g8716.t1	0	2	MS2	0.2192		0	200	1	14.3983	1	20171202_blank06.RAW	1202.57
		FALSE	High		Sequest HT (AK2)	Unambiguous	[R].ETGQAGHFGAAR.[F]		2	2	pcri_g8718.t1; pcri_g8716.t1	pcri_g8718.t1; pcri_g8716.t1	0	2	MS2	0.342		0	200	1	19.3137	1	20171101_03.RAW	1200.93
		FALSE	High		Sequest HT (B2)	Unambiguous	[R].ETGQAGHFGAAR.[F]		2	2	pcri_g8718.t1; pcri_g8716.t1	pcri_g8718.t1; pcri_g8716.t1	0	2	MS2	0.2031		0	200	1	13.8458	1	20171202_blank09.RAW	1202.21
		FALSE	High		Sequest HT (P2)	Unambiguous	[R].ETGQAGHFGAAR.[F]		2	2	pcri_g8718.t1; pcri_g8716.t1	pcri_g8718.t1; pcri_g8716.t1	0	1	MS2	0.2897		0	200	1	13.6827	1	20171202_05.RAW	1201.74
		FALSE	High		Sequest HT (AJ2)	Unambiguous	[R].ETGQAGHFGAAR.[F]		2	2	pcri_g8718.t1; pcri_g8716.t1	pcri_g8718.t1; pcri_g8716.t1	0	1	MS2	0.2689		0	200	1	17.5852	1	20171101_04.RAW	1202.6
		FALSE	High		Sequest HT (Q2)	Unambiguous	[R].ETGQAGHFGAAR.[F]		2	2	pcri_g8718.t1; pcri_g8716.t1	pcri_g8718.t1; pcri_g8716.t1	0	1	MS2	0.3671		0	200	1	13.6266	1	20171202_04.RAW	1201.73
		FALSE	High		Sequest HT (AD2)	Unambiguous	[R].ETGQAGHFGAAR.[F]		2	2	pcri_g8718.t1; pcri_g8716.t1	pcri_g8718.t1; pcri_g8716.t1	0	1	MS2	0.323		0	200	1	16.8925	1	20171101_10.RAW	1201.84
		FALSE	High		Sequest HT (K2)	Unambiguous	[R].ETGQAGHFGAAR.[F]		2	2	pcri_g8718.t1; pcri_g8716.t1	pcri_g8718.t1; pcri_g8716.t1	0	1	MS2	0.349		0	200	1	13.9092	1	20171202_10.RAW	1201.43
	FALSE	High	[R].DNLWEIGGPYWWPFSSFTPPAHLDGSLPGDR.[G]				2	2	1	pcri_g8718.t1; pcri_g8716.t1	pcri_g8718.t1 pcri_g8716.t1	pcri_g8718.t1 [59-89]; pcri_g8716.t1 [59-89]	0	3514.65	Not Found	Not Found	Not Found	Not Found	Not Found	Not Found	Not Found	Not Found	Not Found	Not Found	Not Found	Not Found	Not Found	Not Found	Not Found	Not Found	Not Found	High	Not Found	Not Found	Not Found	High	4.87	R.DNLWEIGGPYWWPFSSFTPPAHLDGSLPGDR.G	[59-89]
		Checked	Confidence		Identifying Node	PSM Ambiguity	Annotated Sequence	Modifications	# Protein Groups	# Proteins	Master Protein Accessions	Protein Accessions	# Missed Cleavages	Charge	MS Order	DeltaScore	Isolation Interference [%]	DeltaCn	Ion Inject Time [ms]	Rank	RT [min]	Search Engine Rank	Spectrum File	MH+ [Da]
		FALSE	High		Sequest HT (Q2)	Unambiguous	[R].DNLWEIGGPYWWPFSSFTPPAHLDGSLPGDR.[G]		2	2	pcri_g8718.t1; pcri_g8716.t1	pcri_g8718.t1; pcri_g8716.t1	0	3	MS2	0.5811		0	200	1	44.2086	1	20171202_04.RAW	3518.7
	FALSE	High	[K].DHLASPFEANIFTYGDR.[G]				3	3	68	pcri_g8720.t1; pcri_g8718.t1; pcri_g8716.t1	pcri_g8720.t1 pcri_g8718.t1 pcri_g8716.t1	pcri_g8720.t1 [186-202]; pcri_g8718.t1 [250-266]; pcri_g8716.t1 [250-266]	0	1952.91	Not Found	High	Not Found	High	High	High	Not Found	High	High	High	Not Found	High	Not Found	High	Not Found	High	Not Found	High	High	Not Found	High	High	5.64	K.DHLASPFEANIFTYGDR.G	[250-266]
		Checked	Confidence		Identifying Node	PSM Ambiguity	Annotated Sequence	Modifications	# Protein Groups	# Proteins	Master Protein Accessions	Protein Accessions	# Missed Cleavages	Charge	MS Order	DeltaScore	Isolation Interference [%]	DeltaCn	Ion Inject Time [ms]	Rank	RT [min]	Search Engine Rank	Spectrum File	MH+ [Da]
		FALSE	High		Sequest HT (R2)	Unambiguous	[K].DHLASPFEANIFTYGDR.[G]		3	3	pcri_g8720.t1; pcri_g8718.t1; pcri_g8716.t1	pcri_g8720.t1; pcri_g8718.t1; pcri_g8716.t1	0	2	MS2	0.6968		0	200	1	32.6426	1	20171202_03.RAW	1953.97
		FALSE	High		Sequest HT (T2)	Unambiguous	[K].DHLASPFEANIFTYGDR.[G]		3	3	pcri_g8720.t1; pcri_g8718.t1; pcri_g8716.t1	pcri_g8720.t1; pcri_g8718.t1; pcri_g8716.t1	0	2	MS2	0.6961		0	200	1	32.9518	1	20171202_01.RAW	1954.36
		FALSE	High		Sequest HT (AJ2)	Unambiguous	[K].DHLASPFEANIFTYGDR.[G]		3	3	pcri_g8720.t1; pcri_g8718.t1; pcri_g8716.t1	pcri_g8720.t1; pcri_g8718.t1; pcri_g8716.t1	0	2	MS2	0.6979		0	169.577	1	34.424	1	20171101_04.RAW	1953.58
		FALSE	High		Sequest HT (Q2)	Unambiguous	[K].DHLASPFEANIFTYGDR.[G]		3	3	pcri_g8720.t1; pcri_g8718.t1; pcri_g8716.t1	pcri_g8720.t1; pcri_g8718.t1; pcri_g8716.t1	0	2	MS2	0.6629		0	200	1	33.398	1	20171202_04.RAW	1953.52
		FALSE	High		Sequest HT (AM2)	Unambiguous	[K].DHLASPFEANIFTYGDR.[G]		3	3	pcri_g8720.t1; pcri_g8718.t1; pcri_g8716.t1	pcri_g8720.t1; pcri_g8718.t1; pcri_g8716.t1	0	2	MS2	0.6881		0	200	1	34.8737	1	20171101_01.RAW	1954.42
		FALSE	High		Sequest HT (AJ2)	Unambiguous	[K].DHLASPFEANIFTYGDR.[G]		3	3	pcri_g8720.t1; pcri_g8718.t1; pcri_g8716.t1	pcri_g8720.t1; pcri_g8718.t1; pcri_g8716.t1	0	2	MS2	0.7086		0	200	1	58.9302	1	20171101_04.RAW	1954.55
		FALSE	High		Sequest HT (Q2)	Unambiguous	[K].DHLASPFEANIFTYGDR.[G]		3	3	pcri_g8720.t1; pcri_g8718.t1; pcri_g8716.t1	pcri_g8720.t1; pcri_g8718.t1; pcri_g8716.t1	0	2	MS2	0.739		0	200	1	35.5073	1	20171202_04.RAW	1954.3
		FALSE	High		Sequest HT (Q2)	Unambiguous	[K].DHLASPFEANIFTYGDR.[G]		3	3	pcri_g8720.t1; pcri_g8718.t1; pcri_g8716.t1	pcri_g8720.t1; pcri_g8718.t1; pcri_g8716.t1	0	2	MS2	0.7162		0	200	1	32.8568	1	20171202_04.RAW	1953.49
		FALSE	High		Sequest HT (S2)	Unambiguous	[K].DHLASPFEANIFTYGDR.[G]		3	3	pcri_g8720.t1; pcri_g8718.t1; pcri_g8716.t1	pcri_g8720.t1; pcri_g8718.t1; pcri_g8716.t1	0	2	MS2	0.7297		0	200	1	32.6648	1	20171202_02.RAW	1953.81
		FALSE	High		Sequest HT (Q2)	Unambiguous	[K].DHLASPFEANIFTYGDR.[G]		3	3	pcri_g8720.t1; pcri_g8718.t1; pcri_g8716.t1	pcri_g8720.t1; pcri_g8718.t1; pcri_g8716.t1	0	2	MS2	0.6471		0	133.811	1	32.9828	1	20171202_04.RAW	1956.63
		FALSE	High		Sequest HT (AL2)	Unambiguous	[K].DHLASPFEANIFTYGDR.[G]		3	3	pcri_g8720.t1; pcri_g8718.t1; pcri_g8716.t1	pcri_g8720.t1; pcri_g8718.t1; pcri_g8716.t1	0	2	MS2	0.6798		0	200	1	34.2406	1	20171101_02.RAW	1954.67
		FALSE	High		Sequest HT (AK2)	Unambiguous	[K].DHLASPFEANIFTYGDR.[G]		3	3	pcri_g8720.t1; pcri_g8718.t1; pcri_g8716.t1	pcri_g8720.t1; pcri_g8718.t1; pcri_g8716.t1	0	2	MS2	0.7303		0	200	1	34.8469	1	20171101_03.RAW	1953.69
		FALSE	High		Sequest HT (S2)	Unambiguous	[K].DHLASPFEANIFTYGDR.[G]		3	3	pcri_g8720.t1; pcri_g8718.t1; pcri_g8716.t1	pcri_g8720.t1; pcri_g8718.t1; pcri_g8716.t1	0	2	MS2	0.6473		0	200	1	33.2159	1	20171202_02.RAW	1953.82
		FALSE	High		Sequest HT (Q2)	Unambiguous	[K].DHLASPFEANIFTYGDR.[G]		3	3	pcri_g8720.t1; pcri_g8718.t1; pcri_g8716.t1	pcri_g8720.t1; pcri_g8718.t1; pcri_g8716.t1	0	2	MS2	0.7247		0	200	1	33.9742	1	20171202_04.RAW	1953.77
		FALSE	High		Sequest HT (S2)	Unambiguous	[K].DHLASPFEANIFTYGDR.[G]		3	3	pcri_g8720.t1; pcri_g8718.t1; pcri_g8716.t1	pcri_g8720.t1; pcri_g8718.t1; pcri_g8716.t1	0	2	MS2	0.7137		0	200	1	33.7786	1	20171202_02.RAW	1954.5
		FALSE	High		Sequest HT (P2)	Unambiguous	[K].DHLASPFEANIFTYGDR.[G]		3	3	pcri_g8720.t1; pcri_g8718.t1; pcri_g8716.t1	pcri_g8720.t1; pcri_g8718.t1; pcri_g8716.t1	0	2	MS2	0.7239		0	200	1	32.9008	1	20171202_05.RAW	1953.8
		FALSE	High		Sequest HT (P2)	Unambiguous	[K].DHLASPFEANIFTYGDR.[G]		3	3	pcri_g8720.t1; pcri_g8718.t1; pcri_g8716.t1	pcri_g8720.t1; pcri_g8718.t1; pcri_g8716.t1	0	2	MS2	0.7377		0	200	1	34.0746	1	20171202_05.RAW	1953.2
		FALSE	High		Sequest HT (AI2)	Unambiguous	[K].DHLASPFEANIFTYGDR.[G]		3	3	pcri_g8720.t1; pcri_g8718.t1; pcri_g8716.t1	pcri_g8720.t1; pcri_g8718.t1; pcri_g8716.t1	0	2	MS2	0.6879		0	200	1	34.9659	1	20171101_05.RAW	1953.28
		FALSE	High		Sequest HT (Y2)	Unambiguous	[K].DHLASPFEANIFTYGDR.[G]		3	3	pcri_g8720.t1; pcri_g8718.t1; pcri_g8716.t1	pcri_g8720.t1; pcri_g8718.t1; pcri_g8716.t1	0	2	MS2	0.7273		0	200	1	34.5686	1	20171101_blank05.RAW	1953.62
		FALSE	High		Sequest HT (AJ2)	Unambiguous	[K].DHLASPFEANIFTYGDR.[G]		3	3	pcri_g8720.t1; pcri_g8718.t1; pcri_g8716.t1	pcri_g8720.t1; pcri_g8718.t1; pcri_g8716.t1	0	2	MS2	0.7069		0	200	1	57.6006	1	20171101_04.RAW	1954.65
		FALSE	High		Sequest HT (AJ2)	Unambiguous	[K].DHLASPFEANIFTYGDR.[G]		3	3	pcri_g8720.t1; pcri_g8718.t1; pcri_g8716.t1	pcri_g8720.t1; pcri_g8718.t1; pcri_g8716.t1	0	2	MS2	0.652		0	200	1	34.9807	1	20171101_04.RAW	1953.42
		FALSE	High		Sequest HT (AJ2)	Unambiguous	[K].DHLASPFEANIFTYGDR.[G]		3	3	pcri_g8720.t1; pcri_g8718.t1; pcri_g8716.t1	pcri_g8720.t1; pcri_g8718.t1; pcri_g8716.t1	0	2	MS2	0.6681		0	200	1	37.7082	1	20171101_04.RAW	1954.13
		FALSE	High		Sequest HT (AI2)	Unambiguous	[K].DHLASPFEANIFTYGDR.[G]		3	3	pcri_g8720.t1; pcri_g8718.t1; pcri_g8716.t1	pcri_g8720.t1; pcri_g8718.t1; pcri_g8716.t1	0	2	MS2	0.7232		0	200	1	34.3973	1	20171101_05.RAW	1953.23
		FALSE	High		Sequest HT (AI2)	Unambiguous	[K].DHLASPFEANIFTYGDR.[G]		3	3	pcri_g8720.t1; pcri_g8718.t1; pcri_g8716.t1	pcri_g8720.t1; pcri_g8718.t1; pcri_g8716.t1	0	2	MS2	0.6565		0	200	1	35.7952	1	20171101_05.RAW	1953.67
		FALSE	High		Sequest HT (P2)	Unambiguous	[K].DHLASPFEANIFTYGDR.[G]		3	3	pcri_g8720.t1; pcri_g8718.t1; pcri_g8716.t1	pcri_g8720.t1; pcri_g8718.t1; pcri_g8716.t1	0	2	MS2	0.6848		0	200	1	33.4651	1	20171202_05.RAW	1952.92
		FALSE	High		Sequest HT (AJ2)	Unambiguous	[K].DHLASPFEANIFTYGDR.[G]		3	3	pcri_g8720.t1; pcri_g8718.t1; pcri_g8716.t1	pcri_g8720.t1; pcri_g8718.t1; pcri_g8716.t1	0	2	MS2	0.671		0	200	1	35.672	1	20171101_04.RAW	1953.72
		FALSE	High		Sequest HT (S2)	Unambiguous	[K].DHLASPFEANIFTYGDR.[G]		3	3	pcri_g8720.t1; pcri_g8718.t1; pcri_g8716.t1	pcri_g8720.t1; pcri_g8718.t1; pcri_g8716.t1	0	3	MS2	0.4845		0	200	1	33.7038	1	20171202_02.RAW	1955.09
		FALSE	High		Sequest HT (AJ2)	Unambiguous	[K].DHLASPFEANIFTYGDR.[G]		3	3	pcri_g8720.t1; pcri_g8718.t1; pcri_g8716.t1	pcri_g8720.t1; pcri_g8718.t1; pcri_g8716.t1	0	2	MS2	0.677		0	200	1	58.158	1	20171101_04.RAW	1954.07
		FALSE	High		Sequest HT (X2)	Unambiguous	[K].DHLASPFEANIFTYGDR.[G]		3	3	pcri_g8720.t1; pcri_g8718.t1; pcri_g8716.t1	pcri_g8720.t1; pcri_g8718.t1; pcri_g8716.t1	0	2	MS2	0.6374		0	200	1	34.7926	1	20171101_blank06.RAW	1954.64
		FALSE	High		Sequest HT (AH2)	Unambiguous	[K].DHLASPFEANIFTYGDR.[G]		3	3	pcri_g8720.t1; pcri_g8718.t1; pcri_g8716.t1	pcri_g8720.t1; pcri_g8718.t1; pcri_g8716.t1	0	2	MS2	0.6755		0	200	1	34.8177	1	20171101_06.RAW	1954.77
		FALSE	High		Sequest HT (AJ2)	Unambiguous	[K].DHLASPFEANIFTYGDR.[G]		3	3	pcri_g8720.t1; pcri_g8718.t1; pcri_g8716.t1	pcri_g8720.t1; pcri_g8718.t1; pcri_g8716.t1	0	2	MS2	0.6901		0	200	1	47.374	1	20171101_04.RAW	1953.41
		FALSE	High		Sequest HT (AI2)	Unambiguous	[K].DHLASPFEANIFTYGDR.[G]		3	3	pcri_g8720.t1; pcri_g8718.t1; pcri_g8716.t1	pcri_g8720.t1; pcri_g8718.t1; pcri_g8716.t1	0	3	MS2	0.567		0	200	1	35.4622	1	20171101_05.RAW	1954.45
		FALSE	High		Sequest HT (AJ2)	Unambiguous	[K].DHLASPFEANIFTYGDR.[G]		3	3	pcri_g8720.t1; pcri_g8718.t1; pcri_g8716.t1	pcri_g8720.t1; pcri_g8718.t1; pcri_g8716.t1	0	3	MS2	0.5567		0	200	1	47.5132	1	20171101_04.RAW	1954.96
		FALSE	High		Sequest HT (X2)	Unambiguous	[K].DHLASPFEANIFTYGDR.[G]		3	3	pcri_g8720.t1; pcri_g8718.t1; pcri_g8716.t1	pcri_g8720.t1; pcri_g8718.t1; pcri_g8716.t1	0	3	MS2	0.4668		0	200	1	35.2863	1	20171101_blank06.RAW	1955.33
		FALSE	High		Sequest HT (AJ2)	Unambiguous	[K].DHLASPFEANIFTYGDR.[G]		3	3	pcri_g8720.t1; pcri_g8718.t1; pcri_g8716.t1	pcri_g8720.t1; pcri_g8718.t1; pcri_g8716.t1	0	3	MS2	0.5332		0	200	1	55.9111	1	20171101_04.RAW	1955.02
		FALSE	High		Sequest HT (Q2)	Unambiguous	[K].DHLASPFEANIFTYGDR.[G]		3	3	pcri_g8720.t1; pcri_g8718.t1; pcri_g8716.t1	pcri_g8720.t1; pcri_g8718.t1; pcri_g8716.t1	0	2	MS2	0.6888		0	200	1	34.6993	1	20171202_04.RAW	1952.91
		FALSE	High		Sequest HT (AJ2)	Unambiguous	[K].DHLASPFEANIFTYGDR.[G]		3	3	pcri_g8720.t1; pcri_g8718.t1; pcri_g8716.t1	pcri_g8720.t1; pcri_g8718.t1; pcri_g8716.t1	0	3	MS2	0.3989		0	200	1	54.8029	1	20171101_04.RAW	1955.74
		FALSE	High		Sequest HT (AJ2)	Unambiguous	[K].DHLASPFEANIFTYGDR.[G]		3	3	pcri_g8720.t1; pcri_g8718.t1; pcri_g8716.t1	pcri_g8720.t1; pcri_g8718.t1; pcri_g8716.t1	0	2	MS2	0.6515		0	200	1	44.9237	1	20171101_04.RAW	1955.21
		FALSE	High		Sequest HT (P2)	Unambiguous	[K].DHLASPFEANIFTYGDR.[G]		3	3	pcri_g8720.t1; pcri_g8718.t1; pcri_g8716.t1	pcri_g8720.t1; pcri_g8718.t1; pcri_g8716.t1	0	3	MS2	0.5447		0	200	1	33.4114	1	20171202_05.RAW	1954.29
		FALSE	High		Sequest HT (AJ2)	Unambiguous	[K].DHLASPFEANIFTYGDR.[G]		3	3	pcri_g8720.t1; pcri_g8718.t1; pcri_g8716.t1	pcri_g8720.t1; pcri_g8718.t1; pcri_g8716.t1	0	3	MS2	0.5		0	200	1	45.8864	1	20171101_04.RAW	1953.71
		FALSE	High		Sequest HT (AJ2)	Unambiguous	[K].DHLASPFEANIFTYGDR.[G]		3	3	pcri_g8720.t1; pcri_g8718.t1; pcri_g8716.t1	pcri_g8720.t1; pcri_g8718.t1; pcri_g8716.t1	0	2	MS2	0.6116		0	200	1	41.1789	1	20171101_04.RAW	1953.59
		FALSE	High		Sequest HT (S2)	Unambiguous	[K].DHLASPFEANIFTYGDR.[G]		3	3	pcri_g8720.t1; pcri_g8718.t1; pcri_g8716.t1	pcri_g8720.t1; pcri_g8718.t1; pcri_g8716.t1	0	3	MS2	0.4834		0	200	1	32.6002	1	20171202_02.RAW	1954.1
		FALSE	High		Sequest HT (D2)	Unambiguous	[K].DHLASPFEANIFTYGDR.[G]		3	3	pcri_g8720.t1; pcri_g8718.t1; pcri_g8716.t1	pcri_g8720.t1; pcri_g8718.t1; pcri_g8716.t1	0	3	MS2	0.454		0	200	1	32.9396	1	20171202_blank07.RAW	1954.19
		FALSE	High		Sequest HT (AI2)	Unambiguous	[K].DHLASPFEANIFTYGDR.[G]		3	3	pcri_g8720.t1; pcri_g8718.t1; pcri_g8716.t1	pcri_g8720.t1; pcri_g8718.t1; pcri_g8716.t1	0	3	MS2	0.4846		0	200	1	46.0175	1	20171101_05.RAW	1954.83
		FALSE	High		Sequest HT (Y2)	Unambiguous	[K].DHLASPFEANIFTYGDR.[G]		3	3	pcri_g8720.t1; pcri_g8718.t1; pcri_g8716.t1	pcri_g8720.t1; pcri_g8718.t1; pcri_g8716.t1	0	3	MS2	0.5043		0	200	1	35.4943	1	20171101_blank05.RAW	1954.04
		FALSE	High		Sequest HT (AJ2)	Unambiguous	[K].DHLASPFEANIFTYGDR.[G]		3	3	pcri_g8720.t1; pcri_g8718.t1; pcri_g8716.t1	pcri_g8720.t1; pcri_g8718.t1; pcri_g8716.t1	0	2	MS2	0.6361		0	200	1	43.7151	1	20171101_04.RAW	1954.07
		FALSE	High		Sequest HT (AJ2)	Unambiguous	[K].DHLASPFEANIFTYGDR.[G]		3	3	pcri_g8720.t1; pcri_g8718.t1; pcri_g8716.t1	pcri_g8720.t1; pcri_g8718.t1; pcri_g8716.t1	0	2	MS2	0.6562		0	200	1	50.549	1	20171101_04.RAW	1953.6
		FALSE	High		Sequest HT (AL2)	Unambiguous	[K].DHLASPFEANIFTYGDR.[G]		3	3	pcri_g8720.t1; pcri_g8718.t1; pcri_g8716.t1	pcri_g8720.t1; pcri_g8718.t1; pcri_g8716.t1	0	2	MS2	0.6232		0	200	1	43.3721	1	20171101_02.RAW	1955.59
		FALSE	High		Sequest HT (AA2)	Unambiguous	[K].DHLASPFEANIFTYGDR.[G]		3	3	pcri_g8720.t1; pcri_g8718.t1; pcri_g8716.t1	pcri_g8720.t1; pcri_g8718.t1; pcri_g8716.t1	0	3	MS2	0.4042		0	200	1	34.5173	1	20171101_blank03.RAW	1953.96
		FALSE	High		Sequest HT (AJ2)	Unambiguous	[K].DHLASPFEANIFTYGDR.[G]		3	3	pcri_g8720.t1; pcri_g8718.t1; pcri_g8716.t1	pcri_g8720.t1; pcri_g8718.t1; pcri_g8716.t1	0	2	MS2	0.6336		0	200	1	42.5966	1	20171101_04.RAW	1953.71
		FALSE	High		Sequest HT (AJ2)	Unambiguous	[K].DHLASPFEANIFTYGDR.[G]		3	3	pcri_g8720.t1; pcri_g8718.t1; pcri_g8716.t1	pcri_g8720.t1; pcri_g8718.t1; pcri_g8716.t1	0	2	MS2	0.4532		0	200	1	59.7196	1	20171101_04.RAW	1953.15
		FALSE	High		Sequest HT (S2)	Unambiguous	[K].DHLASPFEANIFTYGDR.[G]		3	3	pcri_g8720.t1; pcri_g8718.t1; pcri_g8716.t1	pcri_g8720.t1; pcri_g8718.t1; pcri_g8716.t1	0	3	MS2	0.5061		0	200	1	33.1513	1	20171202_02.RAW	1953.17
		FALSE	High		Sequest HT (AJ2)	Unambiguous	[K].DHLASPFEANIFTYGDR.[G]		3	3	pcri_g8720.t1; pcri_g8718.t1; pcri_g8716.t1	pcri_g8720.t1; pcri_g8718.t1; pcri_g8716.t1	0	2	MS2	0.6183		0	200	1	55.299	1	20171101_04.RAW	1953.14
		FALSE	High		Sequest HT (Y2)	Unambiguous	[K].DHLASPFEANIFTYGDR.[G]		3	3	pcri_g8720.t1; pcri_g8718.t1; pcri_g8716.t1	pcri_g8720.t1; pcri_g8718.t1; pcri_g8716.t1	0	3	MS2	0.4673		0	200	1	53.8324	1	20171101_blank05.RAW	1954.82
		FALSE	High		Sequest HT (Y2)	Unambiguous	[K].DHLASPFEANIFTYGDR.[G]		3	3	pcri_g8720.t1; pcri_g8718.t1; pcri_g8716.t1	pcri_g8720.t1; pcri_g8718.t1; pcri_g8716.t1	0	3	MS2	0.3036		0	200	1	46.0962	1	20171101_blank05.RAW	1954.02
		FALSE	High		Sequest HT (AH2)	Unambiguous	[K].DHLASPFEANIFTYGDR.[G]		3	3	pcri_g8720.t1; pcri_g8718.t1; pcri_g8716.t1	pcri_g8720.t1; pcri_g8718.t1; pcri_g8716.t1	0	3	MS2	0.3588		0	200	1	34.6472	1	20171101_06.RAW	1953.64
		FALSE	High		Sequest HT (E2)	Unambiguous	[K].DHLASPFEANIFTYGDR.[G]		3	3	pcri_g8720.t1; pcri_g8718.t1; pcri_g8716.t1	pcri_g8720.t1; pcri_g8718.t1; pcri_g8716.t1	0	3	MS2	0.4448		0	200	1	33.0414	1	20171202_blank06.RAW	1953.8
		FALSE	High		Sequest HT (Y2)	Unambiguous	[K].DHLASPFEANIFTYGDR.[G]		3	3	pcri_g8720.t1; pcri_g8718.t1; pcri_g8716.t1	pcri_g8720.t1; pcri_g8718.t1; pcri_g8716.t1	0	3	MS2	0.4426		0	200	1	49.0836	1	20171101_blank05.RAW	1954.14
		FALSE	High		Sequest HT (Y2)	Unambiguous	[K].DHLASPFEANIFTYGDR.[G]		3	3	pcri_g8720.t1; pcri_g8718.t1; pcri_g8716.t1	pcri_g8720.t1; pcri_g8718.t1; pcri_g8716.t1	0	3	MS2	0.5729		0	200	1	34.9442	1	20171101_blank05.RAW	1954.03
		FALSE	High		Sequest HT (Y2)	Unambiguous	[K].DHLASPFEANIFTYGDR.[G]		3	3	pcri_g8720.t1; pcri_g8718.t1; pcri_g8716.t1	pcri_g8720.t1; pcri_g8718.t1; pcri_g8716.t1	0	3	MS2	0.378		0	200	1	48.1782	1	20171101_blank05.RAW	1954.21
		FALSE	High		Sequest HT (Y2)	Unambiguous	[K].DHLASPFEANIFTYGDR.[G]		3	3	pcri_g8720.t1; pcri_g8718.t1; pcri_g8716.t1	pcri_g8720.t1; pcri_g8718.t1; pcri_g8716.t1	0	3	MS2	0.5439		0	200	1	43.7303	1	20171101_blank05.RAW	1954.34
		FALSE	High		Sequest HT (Y2)	Unambiguous	[K].DHLASPFEANIFTYGDR.[G]		3	3	pcri_g8720.t1; pcri_g8718.t1; pcri_g8716.t1	pcri_g8720.t1; pcri_g8718.t1; pcri_g8716.t1	0	3	MS2	0.3922		0	200	1	44.4783	1	20171101_blank05.RAW	1954.23
		FALSE	High		Sequest HT (W2)	Unambiguous	[K].DHLASPFEANIFTYGDR.[G]		3	3	pcri_g8720.t1; pcri_g8718.t1; pcri_g8716.t1	pcri_g8720.t1; pcri_g8718.t1; pcri_g8716.t1	0	3	MS2	0.5089		0	200	1	34.8296	1	20171101_blank07.RAW	1954.5
		FALSE	High		Sequest HT (Y2)	Unambiguous	[K].DHLASPFEANIFTYGDR.[G]		3	3	pcri_g8720.t1; pcri_g8718.t1; pcri_g8716.t1	pcri_g8720.t1; pcri_g8718.t1; pcri_g8716.t1	0	3	MS2	0.1496		0	200	1	47.5774	1	20171101_blank05.RAW	1956.4
		FALSE	High		Sequest HT (Y2)	Unambiguous	[K].DHLASPFEANIFTYGDR.[G]		3	3	pcri_g8720.t1; pcri_g8718.t1; pcri_g8716.t1	pcri_g8720.t1; pcri_g8718.t1; pcri_g8716.t1	0	3	MS2	0.4835		0	200	1	41.9331	1	20171101_blank05.RAW	1955.05
		FALSE	High		Sequest HT (X2)	Unambiguous	[K].DHLASPFEANIFTYGDR.[G]		3	3	pcri_g8720.t1; pcri_g8718.t1; pcri_g8716.t1	pcri_g8720.t1; pcri_g8718.t1; pcri_g8716.t1	0	3	MS2	0.4157		0	200	1	46.4968	1	20171101_blank06.RAW	1953.74
		FALSE	High		Sequest HT (X2)	Unambiguous	[K].DHLASPFEANIFTYGDR.[G]		3	3	pcri_g8720.t1; pcri_g8718.t1; pcri_g8716.t1	pcri_g8720.t1; pcri_g8718.t1; pcri_g8716.t1	0	3	MS2	0.4755		0	200	1	48.0293	1	20171101_blank06.RAW	1955.47
		FALSE	High		Sequest HT (AA2)	Unambiguous	[K].DHLASPFEANIFTYGDR.[G]		3	3	pcri_g8720.t1; pcri_g8718.t1; pcri_g8716.t1	pcri_g8720.t1; pcri_g8718.t1; pcri_g8716.t1	0	2	MS2	0.6		0	200	1	34.8073	1	20171101_blank03.RAW	1953.39
	FALSE	High	[R].FDPLDLIETNPLGTDYNR.[Q]				2	2	38	pcri_g8718.t1; pcri_g8716.t1	pcri_g8718.t1 pcri_g8716.t1	pcri_g8718.t1 [199-216]; pcri_g8716.t1 [199-216]	0	2093.02	Not Found	Not Found	Not Found	Not Found	Not Found	Not Found	Not Found	High	High	Not Found	Not Found	High	Not Found	Not Found	Not Found	Not Found	Not Found	High	Not Found	Not Found	Not Found	High	5.91	R.FDPLDLIETNPLGTDYNR.Q	[199-216]
		Checked	Confidence		Identifying Node	PSM Ambiguity	Annotated Sequence	Modifications	# Protein Groups	# Proteins	Master Protein Accessions	Protein Accessions	# Missed Cleavages	Charge	MS Order	DeltaScore	Isolation Interference [%]	DeltaCn	Ion Inject Time [ms]	Rank	RT [min]	Search Engine Rank	Spectrum File	MH+ [Da]
		FALSE	High		Sequest HT (K2)	Unambiguous	[R].FDPLDLIETNPLGTDYNR.[Q]		2	2	pcri_g8718.t1; pcri_g8716.t1	pcri_g8718.t1; pcri_g8716.t1	0	2	MS2	0.6074		0	200	1	39.6297	1	20171202_10.RAW	2095.53
		FALSE	High		Sequest HT (Q2)	Unambiguous	[R].FDPLDLIETNPLGTDYNR.[Q]		2	2	pcri_g8718.t1; pcri_g8716.t1	pcri_g8718.t1; pcri_g8716.t1	0	2	MS2	0.5087		0	200	1	39.427	1	20171202_04.RAW	2096.42
		FALSE	High		Sequest HT (AJ2)	Unambiguous	[R].FDPLDLIETNPLGTDYNR.[Q]		2	2	pcri_g8718.t1; pcri_g8716.t1	pcri_g8718.t1; pcri_g8716.t1	0	2	MS2	0.6989		0	200	1	39.7668	1	20171101_04.RAW	2094.5
		FALSE	High		Sequest HT (AD2)	Unambiguous	[R].FDPLDLIETNPLGTDYNR.[Q]		2	2	pcri_g8718.t1; pcri_g8716.t1	pcri_g8718.t1; pcri_g8716.t1	0	2	MS2	0.6155		0	200	1	40.2641	1	20171101_10.RAW	2094.34
		FALSE	High		Sequest HT (AI2)	Unambiguous	[R].FDPLDLIETNPLGTDYNR.[Q]		2	2	pcri_g8718.t1; pcri_g8716.t1	pcri_g8718.t1; pcri_g8716.t1	0	2	MS2	0.6507		0	200	1	39.6086	1	20171101_05.RAW	2094.29
		FALSE	High		Sequest HT (AJ2)	Unambiguous	[R].FDPLDLIETNPLGTDYNR.[Q]		2	2	pcri_g8718.t1; pcri_g8716.t1	pcri_g8718.t1; pcri_g8716.t1	0	2	MS2	0.6978		0	200	1	40.3172	1	20171101_04.RAW	2094.36
		FALSE	High		Sequest HT (Y2)	Unambiguous	[R].FDPLDLIETNPLGTDYNR.[Q]		2	2	pcri_g8718.t1; pcri_g8716.t1	pcri_g8718.t1; pcri_g8716.t1	0	2	MS2	0.6469		0	200	1	39.9021	1	20171101_blank05.RAW	2093.9
		FALSE	High		Sequest HT (AF2)	Unambiguous	[R].FDPLDLIETNPLGTDYNR.[Q]		2	2	pcri_g8718.t1; pcri_g8716.t1	pcri_g8718.t1; pcri_g8716.t1	0	2	MS2	0.6311		0	200	1	39.9523	1	20171101_08.RAW	2094.78
		FALSE	High		Sequest HT (P2)	Unambiguous	[R].FDPLDLIETNPLGTDYNR.[Q]		2	2	pcri_g8718.t1; pcri_g8716.t1	pcri_g8718.t1; pcri_g8716.t1	0	2	MS2	0.6928		0	122.607	1	39.6473	1	20171202_05.RAW	2093.41
		FALSE	High		Sequest HT (V2)	Unambiguous	[R].FDPLDLIETNPLGTDYNR.[Q]		2	2	pcri_g8718.t1; pcri_g8716.t1	pcri_g8718.t1; pcri_g8716.t1	0	2	MS2	0.6525		0	200	1	39.9372	1	20171101_blank08.RAW	2093.47
		FALSE	High		Sequest HT (AD2)	Unambiguous	[R].FDPLDLIETNPLGTDYNR.[Q]		2	2	pcri_g8718.t1; pcri_g8716.t1	pcri_g8718.t1; pcri_g8716.t1	0	2	MS2	0.6261		0	200	1	39.7005	1	20171101_10.RAW	2093.91
		FALSE	High		Sequest HT (K2)	Unambiguous	[R].FDPLDLIETNPLGTDYNR.[Q]		2	2	pcri_g8718.t1; pcri_g8716.t1	pcri_g8718.t1; pcri_g8716.t1	0	2	MS2	0.5597		0	200	1	40.2935	1	20171202_10.RAW	2094.79
		FALSE	High		Sequest HT (K2)	Unambiguous	[R].FDPLDLIETNPLGTDYNR.[Q]		2	2	pcri_g8718.t1; pcri_g8716.t1	pcri_g8718.t1; pcri_g8716.t1	0	2	MS2	0.7127		0	200	1	39.1706	1	20171202_10.RAW	2092.51
		FALSE	High		Sequest HT (AD2)	Unambiguous	[R].FDPLDLIETNPLGTDYNR.[Q]		2	2	pcri_g8718.t1; pcri_g8716.t1	pcri_g8718.t1; pcri_g8716.t1	0	2	MS2	0.6892		0	200	1	41.3641	1	20171101_10.RAW	2093.68
		FALSE	High		Sequest HT (AJ2)	Unambiguous	[R].FDPLDLIETNPLGTDYNR.[Q]		2	2	pcri_g8718.t1; pcri_g8716.t1	pcri_g8718.t1; pcri_g8716.t1	0	2	MS2	0.7271		0	200	1	40.9325	1	20171101_04.RAW	2093.59
		FALSE	High		Sequest HT (AJ2)	Unambiguous	[R].FDPLDLIETNPLGTDYNR.[Q]		2	2	pcri_g8718.t1; pcri_g8716.t1	pcri_g8718.t1; pcri_g8716.t1	0	2	MS2	0.5645		0	200	1	47.7576	1	20171101_04.RAW	2094.58
		FALSE	High		Sequest HT (AG2)	Unambiguous	[R].FDPLDLIETNPLGTDYNR.[Q]		2	2	pcri_g8718.t1; pcri_g8716.t1	pcri_g8718.t1; pcri_g8716.t1	0	2	MS2	0.6218		0	200	1	39.9811	1	20171101_07.RAW	2094.59
		FALSE	High		Sequest HT (X2)	Unambiguous	[R].FDPLDLIETNPLGTDYNR.[Q]		2	2	pcri_g8718.t1; pcri_g8716.t1	pcri_g8718.t1; pcri_g8716.t1	0	2	MS2	0.6869		0	200	1	40.0606	1	20171101_blank06.RAW	2093.9
		FALSE	High		Sequest HT (AJ2)	Unambiguous	[R].FDPLDLIETNPLGTDYNR.[Q]		2	2	pcri_g8718.t1; pcri_g8716.t1	pcri_g8718.t1; pcri_g8716.t1	0	2	MS2	0.6888		0	200	1	41.4915	1	20171101_04.RAW	2093.99
		FALSE	High		Sequest HT (AD2)	Unambiguous	[R].FDPLDLIETNPLGTDYNR.[Q]		2	2	pcri_g8718.t1; pcri_g8716.t1	pcri_g8718.t1; pcri_g8716.t1	0	2	MS2	0.6936		0	200	1	45.6996	1	20171101_10.RAW	2094.13
		FALSE	High		Sequest HT (K2)	Unambiguous	[R].FDPLDLIETNPLGTDYNR.[Q]		2	2	pcri_g8718.t1; pcri_g8716.t1	pcri_g8718.t1; pcri_g8716.t1	0	2	MS2	0.6571		0	200	1	41.4163	1	20171202_10.RAW	2095.86
		FALSE	High		Sequest HT (AJ2)	Unambiguous	[R].FDPLDLIETNPLGTDYNR.[Q]		2	2	pcri_g8718.t1; pcri_g8716.t1	pcri_g8718.t1; pcri_g8716.t1	0	2	MS2	0.6039		0	200	1	45.2345	1	20171101_04.RAW	2096.37
		FALSE	High		Sequest HT (AJ2)	Unambiguous	[R].FDPLDLIETNPLGTDYNR.[Q]		2	2	pcri_g8718.t1; pcri_g8716.t1	pcri_g8718.t1; pcri_g8716.t1	0	2	MS2	0.5477		0	200	1	46.7255	1	20171101_04.RAW	2095.09
		FALSE	High		Sequest HT (AD2)	Unambiguous	[R].FDPLDLIETNPLGTDYNR.[Q]		2	2	pcri_g8718.t1; pcri_g8716.t1	pcri_g8718.t1; pcri_g8716.t1	0	2	MS2	0.613		0	200	1	40.8131	1	20171101_10.RAW	2093.7
		FALSE	High		Sequest HT (AJ2)	Unambiguous	[R].FDPLDLIETNPLGTDYNR.[Q]		2	2	pcri_g8718.t1; pcri_g8716.t1	pcri_g8718.t1; pcri_g8716.t1	0	2	MS2	0.6849		0	200	1	48.5703	1	20171101_04.RAW	2093.65
		FALSE	High		Sequest HT (AD2)	Unambiguous	[R].FDPLDLIETNPLGTDYNR.[Q]		2	2	pcri_g8718.t1; pcri_g8716.t1	pcri_g8718.t1; pcri_g8716.t1	0	2	MS2	0.6414		0	200	1	41.9566	1	20171101_10.RAW	2093.7
		FALSE	High		Sequest HT (AJ2)	Unambiguous	[R].FDPLDLIETNPLGTDYNR.[Q]		2	2	pcri_g8718.t1; pcri_g8716.t1	pcri_g8718.t1; pcri_g8716.t1	0	2	MS2	0.6016		0	200	1	50.8914	1	20171101_04.RAW	2094.63
		FALSE	High		Sequest HT (Q2)	Unambiguous	[R].FDPLDLIETNPLGTDYNR.[Q]		2	2	pcri_g8718.t1; pcri_g8716.t1	pcri_g8718.t1; pcri_g8716.t1	0	2	MS2	0.6614		0	200	1	39.3391	1	20171202_04.RAW	2092.92
		FALSE	High		Sequest HT (AJ2)	Unambiguous	[R].FDPLDLIETNPLGTDYNR.[Q]		2	2	pcri_g8718.t1; pcri_g8716.t1	pcri_g8718.t1; pcri_g8716.t1	0	2	MS2	0.5134		0	200	1	53.8347	1	20171101_04.RAW	2095.56
		FALSE	High		Sequest HT (AD2)	Unambiguous	[R].FDPLDLIETNPLGTDYNR.[Q]		2	2	pcri_g8718.t1; pcri_g8716.t1	pcri_g8718.t1; pcri_g8716.t1	0	2	MS2	0.6523		0	200	1	42.7726	1	20171101_10.RAW	2093.42
		FALSE	High		Sequest HT (AD2)	Unambiguous	[R].FDPLDLIETNPLGTDYNR.[Q]		2	2	pcri_g8718.t1; pcri_g8716.t1	pcri_g8718.t1; pcri_g8716.t1	0	2	MS2	0.5651		0	200	1	44.1455	1	20171101_10.RAW	2096.2
		FALSE	High		Sequest HT (AJ2)	Unambiguous	[R].FDPLDLIETNPLGTDYNR.[Q]		2	2	pcri_g8718.t1; pcri_g8716.t1	pcri_g8718.t1; pcri_g8716.t1	0	2	MS2	0.6387		0	200	1	44.4847	1	20171101_04.RAW	2094.59
		FALSE	High		Sequest HT (T2)	Unambiguous	[R].FDPLDLIETNPLGTDYNR.[Q]		2	2	pcri_g8718.t1; pcri_g8716.t1	pcri_g8718.t1; pcri_g8716.t1	0	2	MS2	0.6439		0	200	1	39.4903	1	20171202_01.RAW	2093.41
		FALSE	High		Sequest HT (AJ2)	Unambiguous	[R].FDPLDLIETNPLGTDYNR.[Q]		2	2	pcri_g8718.t1; pcri_g8716.t1	pcri_g8718.t1; pcri_g8716.t1	0	2	MS2	0.6407		0	200	1	42.1576	1	20171101_04.RAW	2093.63
		FALSE	High		Sequest HT (AD2)	Unambiguous	[R].FDPLDLIETNPLGTDYNR.[Q]		2	2	pcri_g8718.t1; pcri_g8716.t1	pcri_g8718.t1; pcri_g8716.t1	0	2	MS2	0.535		0	200	1	57.721	1	20171101_10.RAW	2094.2
		FALSE	High		Sequest HT (AJ2)	Unambiguous	[R].FDPLDLIETNPLGTDYNR.[Q]		2	2	pcri_g8718.t1; pcri_g8716.t1	pcri_g8718.t1; pcri_g8716.t1	0	2	MS2	0.5851		0	200	1	42.7259	1	20171101_04.RAW	2094.17
		FALSE	High		Sequest HT (AD2)	Unambiguous	[R].FDPLDLIETNPLGTDYNR.[Q]		2	2	pcri_g8718.t1; pcri_g8716.t1	pcri_g8718.t1; pcri_g8716.t1	0	2	MS2	0.6613		0	200	1	45.1529	1	20171101_10.RAW	2093.29
		FALSE	High		Sequest HT (V2)	Unambiguous	[R].FDPLDLIETNPLGTDYNR.[Q]		2	2	pcri_g8718.t1; pcri_g8716.t1	pcri_g8718.t1; pcri_g8716.t1	0	3	MS2	0.4983		0	200	1	40.035	1	20171101_blank08.RAW	2094.18
	FALSE	High	[R].GTNVVAIFSAFAAVMHIAELAR.[EQ]				3	3	4	pcri_g8720.t1; pcri_g8718.t1; pcri_g8716.t1	pcri_g8720.t1 pcri_g8718.t1 pcri_g8716.t1	pcri_g8720.t1 [203-224]; pcri_g8718.t1 [267-288]; pcri_g8716.t1 [267-288]	0	2288.22	Not Found	Not Found	Not Found	Not Found	Not Found	Not Found	Not Found	High	Not Found	Not Found	Not Found	Not Found	Not Found	Not Found	Not Found	Not Found	Not Found	High	Not Found	Not Found	Not Found	High	4.98	R.GTNVVAIFSAFAAVMHIAELAR.Q	[267-288]
		Checked	Confidence		Identifying Node	PSM Ambiguity	Annotated Sequence	Modifications	# Protein Groups	# Proteins	Master Protein Accessions	Protein Accessions	# Missed Cleavages	Charge	MS Order	DeltaScore	Isolation Interference [%]	DeltaCn	Ion Inject Time [ms]	Rank	RT [min]	Search Engine Rank	Spectrum File	MH+ [Da]
		FALSE	High		Sequest HT (Q2)	Unambiguous	[R].GTNVVAIFSAFAAVMHIAELAR.[EQ]		3	3	pcri_g8720.t1; pcri_g8718.t1; pcri_g8716.t1	pcri_g8720.t1; pcri_g8718.t1; pcri_g8716.t1	0	2	MS2	0.6827		0	200	1	48.8566	1	20171202_04.RAW	2289.57
		FALSE	High		Sequest HT (AJ2)	Unambiguous	[R].GTNVVAIFSAFAAVMHIAELAR.[EQ]		3	3	pcri_g8720.t1; pcri_g8718.t1; pcri_g8716.t1	pcri_g8720.t1; pcri_g8718.t1; pcri_g8716.t1	0	2	MS2	0.6652		0	200	1	47.5874	1	20171101_04.RAW	2289.78
		FALSE	High		Sequest HT (Q2)	Unambiguous	[R].GTNVVAIFSAFAAVMHIAELAR.[EQ]		3	3	pcri_g8720.t1; pcri_g8718.t1; pcri_g8716.t1	pcri_g8720.t1; pcri_g8718.t1; pcri_g8716.t1	0	3	MS2	0.6173		0	200	1	48.7376	1	20171202_04.RAW	2290.91
		FALSE	High		Sequest HT (Y2)	Unambiguous	[R].GTNVVAIFSAFAAVMHIAELAR.[EQ]		3	3	pcri_g8720.t1; pcri_g8718.t1; pcri_g8716.t1	pcri_g8720.t1; pcri_g8718.t1; pcri_g8716.t1	0	3	MS2	0.4333		0	200	1	48.015	1	20171101_blank05.RAW	2290.17
	FALSE	High	[K].GPWWEIPGNLNLYGAPYVAGVVGGHLAFALLEK.[K]				1	1	1	pcri_g8718.t1	pcri_g8718.t1	pcri_g8718.t1 [147-179]	0	3508.84	Not Found	Not Found	Not Found	Not Found	Not Found	Not Found	Not Found	Not Found	Not Found	Not Found	Not Found	Not Found	Not Found	Not Found	Not Found	Not Found	Not Found	High	Not Found	Not Found	Not Found	High	4.42	K.GPWWEIPGNLNLYGAPYVAGVVGGHLAFALLEK.K	[147-179]
		Checked	Confidence		Identifying Node	PSM Ambiguity	Annotated Sequence	Modifications	# Protein Groups	# Proteins	Master Protein Accessions	Protein Accessions	# Missed Cleavages	Charge	MS Order	DeltaScore	Isolation Interference [%]	DeltaCn	Ion Inject Time [ms]	Rank	RT [min]	Search Engine Rank	Spectrum File	MH+ [Da]
		FALSE	High		Sequest HT (Q2)	Unambiguous	[K].GPWWEIPGNLNLYGAPYVAGVVGGHLAFALLEK.[K]		1	1	pcri_g8718.t1	pcri_g8718.t1	0	3	MS2	0.5113		0	200	1	46.6342	1	20171202_04.RAW	3510.75
	FALSE	High	[K].GPIENAKDHLASPFEANIFTYGDR.[G]				3	3	3	pcri_g8720.t1; pcri_g8718.t1; pcri_g8716.t1	pcri_g8720.t1 pcri_g8718.t1 pcri_g8716.t1	pcri_g8720.t1 [179-202]; pcri_g8718.t1 [243-266]; pcri_g8716.t1 [243-266]	1	2662.29	Not Found	Not Found	Not Found	Not Found	Not Found	Not Found	Not Found	High	Not Found	Not Found	Not Found	Not Found	Not Found	Not Found	Not Found	Not Found	Not Found	High	Not Found	Not Found	Not Found	High	6.11	K.GPIENAKDHLASPFEANIFTYGDR.G	[243-266]
		Checked	Confidence		Identifying Node	PSM Ambiguity	Annotated Sequence	Modifications	# Protein Groups	# Proteins	Master Protein Accessions	Protein Accessions	# Missed Cleavages	Charge	MS Order	DeltaScore	Isolation Interference [%]	DeltaCn	Ion Inject Time [ms]	Rank	RT [min]	Search Engine Rank	Spectrum File	MH+ [Da]
		FALSE	High		Sequest HT (Q2)	Unambiguous	[K].GPIENAKDHLASPFEANIFTYGDR.[G]		3	3	pcri_g8720.t1; pcri_g8718.t1; pcri_g8716.t1	pcri_g8720.t1; pcri_g8718.t1; pcri_g8716.t1	1	3	MS2	0.6056		0	200	1	32.0034	1	20171202_04.RAW	2664.41
		FALSE	High		Sequest HT (AJ2)	Unambiguous	[K].GPIENAKDHLASPFEANIFTYGDR.[G]		3	3	pcri_g8720.t1; pcri_g8718.t1; pcri_g8716.t1	pcri_g8720.t1; pcri_g8718.t1; pcri_g8716.t1	1	3	MS2	0.5537		0	200	1	33.4866	1	20171101_04.RAW	2664.57
		FALSE	High		Sequest HT (P2)	Unambiguous	[K].GPIENAKDHLASPFEANIFTYGDR.[G]		3	3	pcri_g8720.t1; pcri_g8718.t1; pcri_g8716.t1	pcri_g8720.t1; pcri_g8718.t1; pcri_g8716.t1	1	3	MS2	0.4671		0	200	1	32.2316	1	20171202_05.RAW	2663.03
	FALSE	High	[K].GPIENAK.[D]				4	4	6	pcri_g8720.t1; pcri_g8718.t1; pcri_g8045.t1; pcri_g8716.t1	pcri_g8720.t1 pcri_g8718.t1 pcri_g8045.t1 pcri_g8716.t1	pcri_g8720.t1 [179-185]; pcri_g8718.t1 [243-249]; pcri_g8045.t1 [238-244]; pcri_g8716.t1 [243-249]	0	728.394	Not Found	Not Found	Not Found	High	Not Found	Not Found	Not Found	High	Not Found	Not Found	Not Found	Not Found	Not Found	High	Not Found	Not Found	Not Found	Not Found	Not Found	Not Found	Not Found	High	1.79	K.GPIENAK.D	[243-249]
		Checked	Confidence		Identifying Node	PSM Ambiguity	Annotated Sequence	Modifications	# Protein Groups	# Proteins	Master Protein Accessions	Protein Accessions	# Missed Cleavages	Charge	MS Order	DeltaScore	Isolation Interference [%]	DeltaCn	Ion Inject Time [ms]	Rank	RT [min]	Search Engine Rank	Spectrum File	MH+ [Da]
		FALSE	High		Sequest HT (AJ2)	Unambiguous	[K].GPIENAK.[D]		4	4	pcri_g8720.t1; pcri_g8718.t1; pcri_g8045.t1; pcri_g8716.t1	pcri_g8720.t1; pcri_g8718.t1; pcri_g8045.t1; pcri_g8716.t1	0	1	MS2	0.2011		0	200	1	13.6354	1	20171101_04.RAW	728.73
		FALSE	High		Sequest HT (S2)	Unambiguous	[K].GPIENAK.[D]		4	4	pcri_g8720.t1; pcri_g8718.t1; pcri_g8045.t1; pcri_g8716.t1	pcri_g8720.t1; pcri_g8718.t1; pcri_g8045.t1; pcri_g8716.t1	0	1	MS2	0.226		0	200	1	11.3199	1	20171202_02.RAW	728.608
		FALSE	High		Sequest HT (AD2)	Unambiguous	[K].GPIENAK.[D]		4	4	pcri_g8720.t1; pcri_g8718.t1; pcri_g8045.t1; pcri_g8716.t1	pcri_g8720.t1; pcri_g8718.t1; pcri_g8045.t1; pcri_g8716.t1	0	1	MS2	0.1698		0	200	1	13.5867	1	20171101_10.RAW	728.544
		FALSE	High		Sequest HT (AL2)	Unambiguous	[K].GPIENAK.[D]		4	4	pcri_g8720.t1; pcri_g8718.t1; pcri_g8045.t1; pcri_g8716.t1	pcri_g8720.t1; pcri_g8718.t1; pcri_g8045.t1; pcri_g8716.t1	0	1	MS2	0.1203		0	200	1	14.9467	1	20171101_02.RAW	728.56
		FALSE	High		Sequest HT (AI2)	Unambiguous	[K].GPIENAK.[D]		4	4	pcri_g8720.t1; pcri_g8718.t1; pcri_g8045.t1; pcri_g8716.t1	pcri_g8720.t1; pcri_g8718.t1; pcri_g8045.t1; pcri_g8716.t1	0	1	MS2	0.2792		0	200	1	13.2061	1	20171101_05.RAW	728.569
		FALSE	High		Sequest HT (AI2)	Unambiguous	[K].GPIENAK.[D]		4	4	pcri_g8720.t1; pcri_g8718.t1; pcri_g8045.t1; pcri_g8716.t1	pcri_g8720.t1; pcri_g8718.t1; pcri_g8045.t1; pcri_g8716.t1	0	1	MS2	0.1565		0	200	1	14.4819	1	20171101_05.RAW	728.552
FALSE	Master Protein	pcri_g8720.t1	BDA47009.1 Photosystem I chlorophyll a/b-binding protein 3-1, chloroplastic [Coccomyxa sp. Obi]	Pc-frLHC3	45	9	363	3	1	243	26.7	6.4	1322.1	9	Not Found	High	High	High	High	Not Found	Not Found	High	High	Not Found	Not Found	High	Not Found	High	Not Found	High	Not Found	High	High	Not Found	Not Found
	Checked	Confidence	Annotated Sequence		Modifications	Modifications in Master Proteins	# Protein Groups	# Proteins	# PSMs	Master Protein Accessions	Master Protein Descriptions	Positions in Master Proteins	# Missed Cleavages	Theo. MH+ [Da]	Found in Sample: [S11] F11: Sample	Found in Sample: [S1] F1: Sample	Found in Sample: [S12] F12: Sample	Found in Sample: [S2] F2: Sample	Found in Sample: [S13] F13: Sample	Found in Sample: [S3] F3: Sample	Found in Sample: [S14] F14: Sample	Found in Sample: [S4] F4: Sample	Found in Sample: [S16] F16: Sample	Found in Sample: [S6] F6: Sample	Found in Sample: [S30] F30: Sample	Found in Sample: [S20] F20: Sample	Found in Sample: [S31] F31: Sample	Found in Sample: [S21] F21: Sample	Found in Sample: [S32] F32: Sample	Found in Sample: [S22] F22: Sample	Found in Sample: [S33] F33: Sample	Found in Sample: [S23] F23: Sample	Found in Sample: [S35] F35: Sample	Found in Sample: [S25] F25: Sample	Found in Sample: [S36] F36: Sample	Confidence (by Search Engine): Sequest HT	XCorr (by Search Engine): Sequest HT	Sequence in Protein	Positions in Protein	Peptide Group Modifications in Protein
	FALSE	High	[R].WLLEGELYNGR.[LV]				4	4	232	pcri_g8720.t1; pcri_g8718.t1; pcri_g8045.t1; pcri_g8716.t1	pcri_g8720.t1 pcri_g8718.t1 pcri_g8045.t1 pcri_g8716.t1	pcri_g8720.t1 [55-65]; pcri_g8718.t1 [119-129]; pcri_g8045.t1 [114-124]; pcri_g8716.t1 [119-129]	0	1349.68	Not Found	High	High	High	High	High	High	High	High	High	Not Found	High	Not Found	High	Not Found	High	Not Found	High	Not Found	Not Found	Not Found	High	4.47	R.WLLEGELYNGR.L	[55-65]
		Checked	Confidence		Identifying Node	PSM Ambiguity	Annotated Sequence	Modifications	# Protein Groups	# Proteins	Master Protein Accessions	Protein Accessions	# Missed Cleavages	Charge	MS Order	DeltaScore	Isolation Interference [%]	DeltaCn	Ion Inject Time [ms]	Rank	RT [min]	Search Engine Rank	Spectrum File	MH+ [Da]
		FALSE	High		Sequest HT (Q2)	Unambiguous	[R].WLLEGELYNGR.[LV]		4	4	pcri_g8720.t1; pcri_g8718.t1; pcri_g8045.t1; pcri_g8716.t1	pcri_g8720.t1; pcri_g8718.t1; pcri_g8045.t1; pcri_g8716.t1	0	2	MS2	0.481		0	200	1	33.3113	1	20171202_04.RAW	1350.15
		FALSE	High		Sequest HT (AD2)	Unambiguous	[R].WLLEGELYNGR.[LV]		4	4	pcri_g8720.t1; pcri_g8718.t1; pcri_g8045.t1; pcri_g8716.t1	pcri_g8720.t1; pcri_g8718.t1; pcri_g8045.t1; pcri_g8716.t1	0	2	MS2	0.537		0	200	1	58.2889	1	20171101_10.RAW	1351.69
		FALSE	High		Sequest HT (AD2)	Unambiguous	[R].WLLEGELYNGR.[LV]		4	4	pcri_g8720.t1; pcri_g8718.t1; pcri_g8045.t1; pcri_g8716.t1	pcri_g8720.t1; pcri_g8718.t1; pcri_g8045.t1; pcri_g8716.t1	0	2	MS2	0.5361		0	200	1	47.0399	1	20171101_10.RAW	1350.55
		FALSE	High		Sequest HT (S2)	Unambiguous	[R].WLLEGELYNGR.[LV]		4	4	pcri_g8720.t1; pcri_g8718.t1; pcri_g8045.t1; pcri_g8716.t1	pcri_g8720.t1; pcri_g8718.t1; pcri_g8045.t1; pcri_g8716.t1	0	2	MS2	0.534		0	200	1	32.977	1	20171202_02.RAW	1350.47
		FALSE	High		Sequest HT (K2)	Unambiguous	[R].WLLEGELYNGR.[LV]		4	4	pcri_g8720.t1; pcri_g8718.t1; pcri_g8045.t1; pcri_g8716.t1	pcri_g8720.t1; pcri_g8718.t1; pcri_g8045.t1; pcri_g8716.t1	0	2	MS2	0.467		0	200	1	33.95	1	20171202_10.RAW	1351.2
		FALSE	High		Sequest HT (AJ2)	Unambiguous	[R].WLLEGELYNGR.[LV]		4	4	pcri_g8720.t1; pcri_g8718.t1; pcri_g8045.t1; pcri_g8716.t1	pcri_g8720.t1; pcri_g8718.t1; pcri_g8045.t1; pcri_g8716.t1	0	2	MS2	0.5849		0	200	1	46.6093	1	20171101_04.RAW	1350.56
		FALSE	High		Sequest HT (AD2)	Unambiguous	[R].WLLEGELYNGR.[LV]		4	4	pcri_g8720.t1; pcri_g8718.t1; pcri_g8045.t1; pcri_g8716.t1	pcri_g8720.t1; pcri_g8718.t1; pcri_g8045.t1; pcri_g8716.t1	0	2	MS2	0.5319		0	200	1	57.7429	1	20171101_10.RAW	1350.48
		FALSE	High		Sequest HT (P2)	Unambiguous	[R].WLLEGELYNGR.[LV]		4	4	pcri_g8720.t1; pcri_g8718.t1; pcri_g8045.t1; pcri_g8716.t1	pcri_g8720.t1; pcri_g8718.t1; pcri_g8045.t1; pcri_g8716.t1	0	2	MS2	0.5201		0	200	1	32.1449	1	20171202_05.RAW	1350.22
		FALSE	High		Sequest HT (AJ2)	Unambiguous	[R].WLLEGELYNGR.[LV]		4	4	pcri_g8720.t1; pcri_g8718.t1; pcri_g8045.t1; pcri_g8716.t1	pcri_g8720.t1; pcri_g8718.t1; pcri_g8045.t1; pcri_g8716.t1	0	2	MS2	0.5071		0	200	1	58.9083	1	20171101_04.RAW	1351.44
		FALSE	High		Sequest HT (AD2)	Unambiguous	[R].WLLEGELYNGR.[LV]		4	4	pcri_g8720.t1; pcri_g8718.t1; pcri_g8045.t1; pcri_g8716.t1	pcri_g8720.t1; pcri_g8718.t1; pcri_g8045.t1; pcri_g8716.t1	0	2	MS2	0.4893		0	200	1	34.8911	1	20171101_10.RAW	1349.65
		FALSE	High		Sequest HT (AJ2)	Unambiguous	[R].WLLEGELYNGR.[LV]		4	4	pcri_g8720.t1; pcri_g8718.t1; pcri_g8045.t1; pcri_g8716.t1	pcri_g8720.t1; pcri_g8718.t1; pcri_g8045.t1; pcri_g8716.t1	0	2	MS2	0.5333		0	200	1	49.9738	1	20171101_04.RAW	1351.57
		FALSE	High		Sequest HT (AD2)	Unambiguous	[R].WLLEGELYNGR.[LV]		4	4	pcri_g8720.t1; pcri_g8718.t1; pcri_g8045.t1; pcri_g8716.t1	pcri_g8720.t1; pcri_g8718.t1; pcri_g8045.t1; pcri_g8716.t1	0	2	MS2	0.5048		0	200	1	35.5361	1	20171101_10.RAW	1351.34
		FALSE	High		Sequest HT (Y2)	Unambiguous	[R].WLLEGELYNGR.[LV]		4	4	pcri_g8720.t1; pcri_g8718.t1; pcri_g8045.t1; pcri_g8716.t1	pcri_g8720.t1; pcri_g8718.t1; pcri_g8045.t1; pcri_g8716.t1	0	2	MS2	0.5096		0	200	1	34.7287	1	20171101_blank05.RAW	1350.57
		FALSE	High		Sequest HT (K2)	Unambiguous	[R].WLLEGELYNGR.[LV]		4	4	pcri_g8720.t1; pcri_g8718.t1; pcri_g8045.t1; pcri_g8716.t1	pcri_g8720.t1; pcri_g8718.t1; pcri_g8045.t1; pcri_g8716.t1	0	2	MS2	0.5933		0	200	1	33.3824	1	20171202_10.RAW	1350.3
		FALSE	High		Sequest HT (Q2)	Unambiguous	[R].WLLEGELYNGR.[LV]		4	4	pcri_g8720.t1; pcri_g8718.t1; pcri_g8045.t1; pcri_g8716.t1	pcri_g8720.t1; pcri_g8718.t1; pcri_g8045.t1; pcri_g8716.t1	0	2	MS2	0.554		0	131.046	1	32.1857	1	20171202_04.RAW	1352.46
		FALSE	High		Sequest HT (AD2)	Unambiguous	[R].WLLEGELYNGR.[LV]		4	4	pcri_g8720.t1; pcri_g8718.t1; pcri_g8045.t1; pcri_g8716.t1	pcri_g8720.t1; pcri_g8718.t1; pcri_g8045.t1; pcri_g8716.t1	0	2	MS2	0.5505		0	200	1	59.4527	1	20171101_10.RAW	1351.51
		FALSE	High		Sequest HT (AD2)	Unambiguous	[R].WLLEGELYNGR.[LV]		4	4	pcri_g8720.t1; pcri_g8718.t1; pcri_g8045.t1; pcri_g8716.t1	pcri_g8720.t1; pcri_g8718.t1; pcri_g8045.t1; pcri_g8716.t1	0	2	MS2	0.5529		0	200	1	48.72	1	20171101_10.RAW	1350.55
		FALSE	High		Sequest HT (AJ2)	Unambiguous	[R].WLLEGELYNGR.[LV]		4	4	pcri_g8720.t1; pcri_g8718.t1; pcri_g8045.t1; pcri_g8716.t1	pcri_g8720.t1; pcri_g8718.t1; pcri_g8045.t1; pcri_g8716.t1	0	2	MS2	0.5628		0	200	1	35.2517	1	20171101_04.RAW	1350.32
		FALSE	High		Sequest HT (R2)	Unambiguous	[R].WLLEGELYNGR.[LV]		4	4	pcri_g8720.t1; pcri_g8718.t1; pcri_g8045.t1; pcri_g8716.t1	pcri_g8720.t1; pcri_g8718.t1; pcri_g8045.t1; pcri_g8716.t1	0	2	MS2	0.5193		0	200	1	32.5997	1	20171202_03.RAW	1350.72
		FALSE	High		Sequest HT (AD2)	Unambiguous	[R].WLLEGELYNGR.[LV]		4	4	pcri_g8720.t1; pcri_g8718.t1; pcri_g8045.t1; pcri_g8716.t1	pcri_g8720.t1; pcri_g8718.t1; pcri_g8045.t1; pcri_g8716.t1	0	2	MS2	0.57		0	200	1	54.0876	1	20171101_10.RAW	1350.45
		FALSE	High		Sequest HT (Q2)	Unambiguous	[R].WLLEGELYNGR.[LV]		4	4	pcri_g8720.t1; pcri_g8718.t1; pcri_g8045.t1; pcri_g8716.t1	pcri_g8720.t1; pcri_g8718.t1; pcri_g8045.t1; pcri_g8716.t1	0	2	MS2	0.5327		0	167.959	1	32.7276	1	20171202_04.RAW	1350.06
		FALSE	High		Sequest HT (U2)	Unambiguous	[R].WLLEGELYNGR.[LV]		4	4	pcri_g8720.t1; pcri_g8718.t1; pcri_g8045.t1; pcri_g8716.t1	pcri_g8720.t1; pcri_g8718.t1; pcri_g8045.t1; pcri_g8716.t1	0	2	MS2	0.5496		0	200	1	34.6248	1	20171101_blank09.RAW	1351.39
		FALSE	High		Sequest HT (AJ2)	Unambiguous	[R].WLLEGELYNGR.[LV]		4	4	pcri_g8720.t1; pcri_g8718.t1; pcri_g8045.t1; pcri_g8716.t1	pcri_g8720.t1; pcri_g8718.t1; pcri_g8045.t1; pcri_g8716.t1	0	2	MS2	0.5157		0	200	1	44.2289	1	20171101_04.RAW	1350.48
		FALSE	High		Sequest HT (AD2)	Unambiguous	[R].WLLEGELYNGR.[LV]		4	4	pcri_g8720.t1; pcri_g8718.t1; pcri_g8045.t1; pcri_g8716.t1	pcri_g8720.t1; pcri_g8718.t1; pcri_g8045.t1; pcri_g8716.t1	0	2	MS2	0.5572		0	200	1	55.3082	1	20171101_10.RAW	1350.33
		FALSE	High		Sequest HT (AD2)	Unambiguous	[R].WLLEGELYNGR.[LV]		4	4	pcri_g8720.t1; pcri_g8718.t1; pcri_g8045.t1; pcri_g8716.t1	pcri_g8720.t1; pcri_g8718.t1; pcri_g8045.t1; pcri_g8716.t1	0	2	MS2	0.5232		0	200	1	49.3408	1	20171101_10.RAW	1350.56
		FALSE	High		Sequest HT (S2)	Unambiguous	[R].WLLEGELYNGR.[LV]		4	4	pcri_g8720.t1; pcri_g8718.t1; pcri_g8045.t1; pcri_g8716.t1	pcri_g8720.t1; pcri_g8718.t1; pcri_g8045.t1; pcri_g8716.t1	0	2	MS2	0.5135		0	195.23	1	32.4281	1	20171202_02.RAW	1349.88
		FALSE	High		Sequest HT (AG2)	Unambiguous	[R].WLLEGELYNGR.[LV]		4	4	pcri_g8720.t1; pcri_g8718.t1; pcri_g8045.t1; pcri_g8716.t1	pcri_g8720.t1; pcri_g8718.t1; pcri_g8045.t1; pcri_g8716.t1	0	2	MS2	0.5332		0	97.362	1	34.2991	1	20171101_07.RAW	1350.45
		FALSE	High		Sequest HT (AJ2)	Unambiguous	[R].WLLEGELYNGR.[LV]		4	4	pcri_g8720.t1; pcri_g8718.t1; pcri_g8045.t1; pcri_g8716.t1	pcri_g8720.t1; pcri_g8718.t1; pcri_g8045.t1; pcri_g8716.t1	0	2	MS2	0.5369		0	200	1	59.9981	1	20171101_04.RAW	1350.53
		FALSE	High		Sequest HT (AJ2)	Unambiguous	[R].WLLEGELYNGR.[LV]		4	4	pcri_g8720.t1; pcri_g8718.t1; pcri_g8045.t1; pcri_g8716.t1	pcri_g8720.t1; pcri_g8718.t1; pcri_g8045.t1; pcri_g8716.t1	0	2	MS2	0.521		0	200	1	42.297	1	20171101_04.RAW	1350.45
		FALSE	High		Sequest HT (AD2)	Unambiguous	[R].WLLEGELYNGR.[LV]		4	4	pcri_g8720.t1; pcri_g8718.t1; pcri_g8045.t1; pcri_g8716.t1	pcri_g8720.t1; pcri_g8718.t1; pcri_g8045.t1; pcri_g8716.t1	0	2	MS2	0.5309		0	200	1	50.9998	1	20171101_10.RAW	1350.76
		FALSE	High		Sequest HT (AJ2)	Unambiguous	[R].WLLEGELYNGR.[LV]		4	4	pcri_g8720.t1; pcri_g8718.t1; pcri_g8045.t1; pcri_g8716.t1	pcri_g8720.t1; pcri_g8718.t1; pcri_g8045.t1; pcri_g8716.t1	0	2	MS2	0.5704		0	200	1	46.0542	1	20171101_04.RAW	1350.75
		FALSE	High		Sequest HT (K2)	Unambiguous	[R].WLLEGELYNGR.[LV]		4	4	pcri_g8720.t1; pcri_g8718.t1; pcri_g8045.t1; pcri_g8716.t1	pcri_g8720.t1; pcri_g8718.t1; pcri_g8045.t1; pcri_g8716.t1	0	2	MS2	0.552		0	200	1	32.1416	1	20171202_10.RAW	1350.32
		FALSE	High		Sequest HT (AD2)	Unambiguous	[R].WLLEGELYNGR.[LV]		4	4	pcri_g8720.t1; pcri_g8718.t1; pcri_g8045.t1; pcri_g8716.t1	pcri_g8720.t1; pcri_g8718.t1; pcri_g8045.t1; pcri_g8716.t1	0	2	MS2	0.4938		0	200	1	58.8386	1	20171101_10.RAW	1351.28
		FALSE	High		Sequest HT (AG2)	Unambiguous	[R].WLLEGELYNGR.[LV]		4	4	pcri_g8720.t1; pcri_g8718.t1; pcri_g8045.t1; pcri_g8716.t1	pcri_g8720.t1; pcri_g8718.t1; pcri_g8045.t1; pcri_g8716.t1	0	2	MS2	0.5174		0	200	1	43.6272	1	20171101_07.RAW	1351.38
		FALSE	High		Sequest HT (AD2)	Unambiguous	[R].WLLEGELYNGR.[LV]		4	4	pcri_g8720.t1; pcri_g8718.t1; pcri_g8045.t1; pcri_g8716.t1	pcri_g8720.t1; pcri_g8718.t1; pcri_g8045.t1; pcri_g8716.t1	0	2	MS2	0.5411		0	200	1	34.3425	1	20171101_10.RAW	1350.43
		FALSE	High		Sequest HT (P2)	Unambiguous	[R].WLLEGELYNGR.[LV]		4	4	pcri_g8720.t1; pcri_g8718.t1; pcri_g8045.t1; pcri_g8716.t1	pcri_g8720.t1; pcri_g8718.t1; pcri_g8045.t1; pcri_g8716.t1	0	2	MS2	0.4888		0	200	1	34.2263	1	20171202_05.RAW	1350.72
		FALSE	High		Sequest HT (AI2)	Unambiguous	[R].WLLEGELYNGR.[LV]		4	4	pcri_g8720.t1; pcri_g8718.t1; pcri_g8045.t1; pcri_g8716.t1	pcri_g8720.t1; pcri_g8718.t1; pcri_g8045.t1; pcri_g8716.t1	0	2	MS2	0.5038		0	200	1	34.6543	1	20171101_05.RAW	1350.06
		FALSE	High		Sequest HT (M2)	Unambiguous	[R].WLLEGELYNGR.[LV]		4	4	pcri_g8720.t1; pcri_g8718.t1; pcri_g8045.t1; pcri_g8716.t1	pcri_g8720.t1; pcri_g8718.t1; pcri_g8045.t1; pcri_g8716.t1	0	2	MS2	0.4987		0	200	1	32.3297	1	20171202_08.RAW	1352.38
		FALSE	High		Sequest HT (N2)	Unambiguous	[R].WLLEGELYNGR.[LV]		4	4	pcri_g8720.t1; pcri_g8718.t1; pcri_g8045.t1; pcri_g8716.t1	pcri_g8720.t1; pcri_g8718.t1; pcri_g8045.t1; pcri_g8716.t1	0	2	MS2	0.5264		0	200	1	31.9466	1	20171202_07.RAW	1350.45
		FALSE	High		Sequest HT (AL2)	Unambiguous	[R].WLLEGELYNGR.[LV]		4	4	pcri_g8720.t1; pcri_g8718.t1; pcri_g8045.t1; pcri_g8716.t1	pcri_g8720.t1; pcri_g8718.t1; pcri_g8045.t1; pcri_g8716.t1	0	2	MS2	0.471		0	200	1	35.0702	1	20171101_02.RAW	1351.24
		FALSE	High		Sequest HT (AD2)	Unambiguous	[R].WLLEGELYNGR.[LV]		4	4	pcri_g8720.t1; pcri_g8718.t1; pcri_g8045.t1; pcri_g8716.t1	pcri_g8720.t1; pcri_g8718.t1; pcri_g8045.t1; pcri_g8716.t1	0	2	MS2	0.5		0	200	1	37.1643	1	20171101_10.RAW	1351
		FALSE	High		Sequest HT (R2)	Unambiguous	[R].WLLEGELYNGR.[LV]		4	4	pcri_g8720.t1; pcri_g8718.t1; pcri_g8045.t1; pcri_g8716.t1	pcri_g8720.t1; pcri_g8718.t1; pcri_g8045.t1; pcri_g8716.t1	0	2	MS2	0.5505		0	200	1	31.8291	1	20171202_03.RAW	1350.46
		FALSE	High		Sequest HT (AJ2)	Unambiguous	[R].WLLEGELYNGR.[LV]		4	4	pcri_g8720.t1; pcri_g8718.t1; pcri_g8045.t1; pcri_g8716.t1	pcri_g8720.t1; pcri_g8718.t1; pcri_g8045.t1; pcri_g8716.t1	0	2	MS2	0.5126		0	200	1	58.3607	1	20171101_04.RAW	1350.1
		FALSE	High		Sequest HT (AK2)	Unambiguous	[R].WLLEGELYNGR.[LV]		4	4	pcri_g8720.t1; pcri_g8718.t1; pcri_g8045.t1; pcri_g8716.t1	pcri_g8720.t1; pcri_g8718.t1; pcri_g8045.t1; pcri_g8716.t1	0	2	MS2	0.5418		0	200	1	34.4824	1	20171101_03.RAW	1350.33
		FALSE	High		Sequest HT (AI2)	Unambiguous	[R].WLLEGELYNGR.[LV]		4	4	pcri_g8720.t1; pcri_g8718.t1; pcri_g8045.t1; pcri_g8716.t1	pcri_g8720.t1; pcri_g8718.t1; pcri_g8045.t1; pcri_g8716.t1	0	2	MS2	0.5544		0	200	1	46.2502	1	20171101_05.RAW	1350.49
		FALSE	High		Sequest HT (AD2)	Unambiguous	[R].WLLEGELYNGR.[LV]		4	4	pcri_g8720.t1; pcri_g8718.t1; pcri_g8045.t1; pcri_g8716.t1	pcri_g8720.t1; pcri_g8718.t1; pcri_g8045.t1; pcri_g8716.t1	0	2	MS2	0.5089		0	200	1	36.3017	1	20171101_10.RAW	1350.66
		FALSE	High		Sequest HT (AI2)	Unambiguous	[R].WLLEGELYNGR.[LV]		4	4	pcri_g8720.t1; pcri_g8718.t1; pcri_g8045.t1; pcri_g8716.t1	pcri_g8720.t1; pcri_g8718.t1; pcri_g8045.t1; pcri_g8716.t1	0	2	MS2	0.5761		0	200	1	58.5217	1	20171101_05.RAW	1350.24
		FALSE	High		Sequest HT (AD2)	Unambiguous	[R].WLLEGELYNGR.[LV]		4	4	pcri_g8720.t1; pcri_g8718.t1; pcri_g8045.t1; pcri_g8716.t1	pcri_g8720.t1; pcri_g8718.t1; pcri_g8045.t1; pcri_g8716.t1	0	2	MS2	0.4645		0	200	1	54.713	1	20171101_10.RAW	1351.45
		FALSE	High		Sequest HT (K2)	Unambiguous	[R].WLLEGELYNGR.[LV]		4	4	pcri_g8720.t1; pcri_g8718.t1; pcri_g8045.t1; pcri_g8716.t1	pcri_g8720.t1; pcri_g8718.t1; pcri_g8045.t1; pcri_g8716.t1	0	2	MS2	0.5598		0	200	1	32.6883	1	20171202_10.RAW	1349.75
		FALSE	High		Sequest HT (AD2)	Unambiguous	[R].WLLEGELYNGR.[LV]		4	4	pcri_g8720.t1; pcri_g8718.t1; pcri_g8045.t1; pcri_g8716.t1	pcri_g8720.t1; pcri_g8718.t1; pcri_g8045.t1; pcri_g8716.t1	0	2	MS2	0.4427		0	200	1	47.5958	1	20171101_10.RAW	1351.47
		FALSE	High		Sequest HT (AJ2)	Unambiguous	[R].WLLEGELYNGR.[LV]		4	4	pcri_g8720.t1; pcri_g8718.t1; pcri_g8045.t1; pcri_g8716.t1	pcri_g8720.t1; pcri_g8718.t1; pcri_g8045.t1; pcri_g8716.t1	0	2	MS2	0.5612		0	200	1	47.1938	1	20171101_04.RAW	1350.52
		FALSE	High		Sequest HT (V2)	Unambiguous	[R].WLLEGELYNGR.[LV]		4	4	pcri_g8720.t1; pcri_g8718.t1; pcri_g8045.t1; pcri_g8716.t1	pcri_g8720.t1; pcri_g8718.t1; pcri_g8045.t1; pcri_g8716.t1	0	2	MS2	0.5051		0	200	1	58.4834	1	20171101_blank08.RAW	1351.68
		FALSE	High		Sequest HT (AI2)	Unambiguous	[R].WLLEGELYNGR.[LV]		4	4	pcri_g8720.t1; pcri_g8718.t1; pcri_g8045.t1; pcri_g8716.t1	pcri_g8720.t1; pcri_g8718.t1; pcri_g8045.t1; pcri_g8716.t1	0	2	MS2	0.5448		0	200	1	38.6709	1	20171101_05.RAW	1350.93
		FALSE	High		Sequest HT (AJ2)	Unambiguous	[R].WLLEGELYNGR.[LV]		4	4	pcri_g8720.t1; pcri_g8718.t1; pcri_g8045.t1; pcri_g8716.t1	pcri_g8720.t1; pcri_g8718.t1; pcri_g8045.t1; pcri_g8716.t1	0	2	MS2	0.5908		0	200	1	53.9418	1	20171101_04.RAW	1350.57
		FALSE	High		Sequest HT (AL2)	Unambiguous	[R].WLLEGELYNGR.[LV]		4	4	pcri_g8720.t1; pcri_g8718.t1; pcri_g8045.t1; pcri_g8716.t1	pcri_g8720.t1; pcri_g8718.t1; pcri_g8045.t1; pcri_g8716.t1	0	2	MS2	0.4706		0	200	1	34.5014	1	20171101_02.RAW	1350
		FALSE	High		Sequest HT (AJ2)	Unambiguous	[R].WLLEGELYNGR.[LV]		4	4	pcri_g8720.t1; pcri_g8718.t1; pcri_g8045.t1; pcri_g8716.t1	pcri_g8720.t1; pcri_g8718.t1; pcri_g8045.t1; pcri_g8716.t1	0	2	MS2	0.5154		0	200	1	37.8915	1	20171101_04.RAW	1350.49
		FALSE	High		Sequest HT (AI2)	Unambiguous	[R].WLLEGELYNGR.[LV]		4	4	pcri_g8720.t1; pcri_g8718.t1; pcri_g8045.t1; pcri_g8716.t1	pcri_g8720.t1; pcri_g8718.t1; pcri_g8045.t1; pcri_g8716.t1	0	2	MS2	0.5872		0	200	1	59.7176	1	20171101_05.RAW	1350.47
		FALSE	High		Sequest HT (AJ2)	Unambiguous	[R].WLLEGELYNGR.[LV]		4	4	pcri_g8720.t1; pcri_g8718.t1; pcri_g8045.t1; pcri_g8716.t1	pcri_g8720.t1; pcri_g8718.t1; pcri_g8045.t1; pcri_g8716.t1	0	2	MS2	0.4744		0	200	1	57.8151	1	20171101_04.RAW	1350.34
		FALSE	High		Sequest HT (AD2)	Unambiguous	[R].WLLEGELYNGR.[LV]		4	4	pcri_g8720.t1; pcri_g8718.t1; pcri_g8045.t1; pcri_g8716.t1	pcri_g8720.t1; pcri_g8718.t1; pcri_g8045.t1; pcri_g8716.t1	0	2	MS2	0.5026		0	200	1	60.003	1	20171101_10.RAW	1351.4
		FALSE	High		Sequest HT (AD2)	Unambiguous	[R].WLLEGELYNGR.[LV]		4	4	pcri_g8720.t1; pcri_g8718.t1; pcri_g8045.t1; pcri_g8716.t1	pcri_g8720.t1; pcri_g8718.t1; pcri_g8045.t1; pcri_g8716.t1	0	2	MS2	0.4256		0	101.373	1	34.44	1	20171101_10.RAW	1353.57
		FALSE	High		Sequest HT (Q2)	Unambiguous	[R].WLLEGELYNGR.[LV]		4	4	pcri_g8720.t1; pcri_g8718.t1; pcri_g8045.t1; pcri_g8716.t1	pcri_g8720.t1; pcri_g8718.t1; pcri_g8045.t1; pcri_g8716.t1	0	2	MS2	0.5129		0	200	1	39.7902	1	20171202_04.RAW	1351.98
		FALSE	High		Sequest HT (AJ2)	Unambiguous	[R].WLLEGELYNGR.[LV]		4	4	pcri_g8720.t1; pcri_g8718.t1; pcri_g8045.t1; pcri_g8716.t1	pcri_g8720.t1; pcri_g8718.t1; pcri_g8045.t1; pcri_g8716.t1	0	2	MS2	0.5438		0	200	1	55.5994	1	20171101_04.RAW	1350.47
		FALSE	High		Sequest HT (AJ2)	Unambiguous	[R].WLLEGELYNGR.[LV]		4	4	pcri_g8720.t1; pcri_g8718.t1; pcri_g8045.t1; pcri_g8716.t1	pcri_g8720.t1; pcri_g8718.t1; pcri_g8045.t1; pcri_g8716.t1	0	2	MS2	0.5685		0	200	1	59.4534	1	20171101_04.RAW	1349.76
		FALSE	High		Sequest HT (AJ2)	Unambiguous	[R].WLLEGELYNGR.[LV]		4	4	pcri_g8720.t1; pcri_g8718.t1; pcri_g8045.t1; pcri_g8716.t1	pcri_g8720.t1; pcri_g8718.t1; pcri_g8045.t1; pcri_g8716.t1	0	2	MS2	0.4755		0	200	1	41.0718	1	20171101_04.RAW	1350.21
		FALSE	High		Sequest HT (AD2)	Unambiguous	[R].WLLEGELYNGR.[LV]		4	4	pcri_g8720.t1; pcri_g8718.t1; pcri_g8045.t1; pcri_g8716.t1	pcri_g8720.t1; pcri_g8718.t1; pcri_g8045.t1; pcri_g8716.t1	0	2	MS2	0.4663		0	200	1	43.1495	1	20171101_10.RAW	1350.63
		FALSE	High		Sequest HT (AJ2)	Unambiguous	[R].WLLEGELYNGR.[LV]		4	4	pcri_g8720.t1; pcri_g8718.t1; pcri_g8045.t1; pcri_g8716.t1	pcri_g8720.t1; pcri_g8718.t1; pcri_g8045.t1; pcri_g8716.t1	0	2	MS2	0.557		0	200	1	57.2462	1	20171101_04.RAW	1350.35
		FALSE	High		Sequest HT (Q2)	Unambiguous	[R].WLLEGELYNGR.[LV]		4	4	pcri_g8720.t1; pcri_g8718.t1; pcri_g8045.t1; pcri_g8716.t1	pcri_g8720.t1; pcri_g8718.t1; pcri_g8045.t1; pcri_g8716.t1	0	2	MS2	0.5221		0	200	1	34.4292	1	20171202_04.RAW	1350.64
		FALSE	High		Sequest HT (AJ2)	Unambiguous	[R].WLLEGELYNGR.[LV]		4	4	pcri_g8720.t1; pcri_g8718.t1; pcri_g8045.t1; pcri_g8716.t1	pcri_g8720.t1; pcri_g8718.t1; pcri_g8045.t1; pcri_g8716.t1	0	2	MS2	0.4442		0	44.52	1	34.1474	1	20171101_04.RAW	1353.19
		FALSE	High		Sequest HT (AJ2)	Unambiguous	[R].WLLEGELYNGR.[LV]		4	4	pcri_g8720.t1; pcri_g8718.t1; pcri_g8045.t1; pcri_g8716.t1	pcri_g8720.t1; pcri_g8718.t1; pcri_g8045.t1; pcri_g8716.t1	0	2	MS2	0.5339		0	200	1	34.0092	1	20171101_04.RAW	1350.01
		FALSE	High		Sequest HT (Q2)	Unambiguous	[R].WLLEGELYNGR.[LV]		4	4	pcri_g8720.t1; pcri_g8718.t1; pcri_g8045.t1; pcri_g8716.t1	pcri_g8720.t1; pcri_g8718.t1; pcri_g8045.t1; pcri_g8716.t1	0	2	MS2	0.5234		0	200	1	33.8663	1	20171202_04.RAW	1351.37
		FALSE	High		Sequest HT (AJ2)	Unambiguous	[R].WLLEGELYNGR.[LV]		4	4	pcri_g8720.t1; pcri_g8718.t1; pcri_g8045.t1; pcri_g8716.t1	pcri_g8720.t1; pcri_g8718.t1; pcri_g8045.t1; pcri_g8716.t1	0	2	MS2	0.5222		0	200	1	43.5643	1	20171101_04.RAW	1350.22
		FALSE	High		Sequest HT (P2)	Unambiguous	[R].WLLEGELYNGR.[LV]		4	4	pcri_g8720.t1; pcri_g8718.t1; pcri_g8045.t1; pcri_g8716.t1	pcri_g8720.t1; pcri_g8718.t1; pcri_g8045.t1; pcri_g8716.t1	0	2	MS2	0.5497		0	200	1	33.4544	1	20171202_05.RAW	1350.36
		FALSE	High		Sequest HT (AD2)	Unambiguous	[R].WLLEGELYNGR.[LV]		4	4	pcri_g8720.t1; pcri_g8718.t1; pcri_g8045.t1; pcri_g8716.t1	pcri_g8720.t1; pcri_g8718.t1; pcri_g8045.t1; pcri_g8716.t1	0	2	MS2	0.5		0	200	1	50.4427	1	20171101_10.RAW	1350.5
		FALSE	High		Sequest HT (AM2)	Unambiguous	[R].WLLEGELYNGR.[LV]		4	4	pcri_g8720.t1; pcri_g8718.t1; pcri_g8045.t1; pcri_g8716.t1	pcri_g8720.t1; pcri_g8718.t1; pcri_g8045.t1; pcri_g8716.t1	0	2	MS2	0.5393		0	200	1	34.487	1	20171101_01.RAW	1350.29
		FALSE	High		Sequest HT (AJ2)	Unambiguous	[R].WLLEGELYNGR.[LV]		4	4	pcri_g8720.t1; pcri_g8718.t1; pcri_g8045.t1; pcri_g8716.t1	pcri_g8720.t1; pcri_g8718.t1; pcri_g8045.t1; pcri_g8716.t1	0	2	MS2	0.5079		0	200	1	34.6925	1	20171101_04.RAW	1350.49
		FALSE	High		Sequest HT (AL2)	Unambiguous	[R].WLLEGELYNGR.[LV]		4	4	pcri_g8720.t1; pcri_g8718.t1; pcri_g8045.t1; pcri_g8716.t1	pcri_g8720.t1; pcri_g8718.t1; pcri_g8045.t1; pcri_g8716.t1	0	2	MS2	0.5445		0	200	1	33.8651	1	20171101_02.RAW	1350.27
		FALSE	High		Sequest HT (AI2)	Unambiguous	[R].WLLEGELYNGR.[LV]		4	4	pcri_g8720.t1; pcri_g8718.t1; pcri_g8045.t1; pcri_g8716.t1	pcri_g8720.t1; pcri_g8718.t1; pcri_g8045.t1; pcri_g8716.t1	0	2	MS2	0.5092		0	200	1	35.3219	1	20171101_05.RAW	1350.51
		FALSE	High		Sequest HT (AD2)	Unambiguous	[R].WLLEGELYNGR.[LV]		4	4	pcri_g8720.t1; pcri_g8718.t1; pcri_g8045.t1; pcri_g8716.t1	pcri_g8720.t1; pcri_g8718.t1; pcri_g8045.t1; pcri_g8716.t1	0	2	MS2	0.4436		0	200	1	43.8876	1	20171101_10.RAW	1350.73
		FALSE	High		Sequest HT (AJ2)	Unambiguous	[R].WLLEGELYNGR.[LV]		4	4	pcri_g8720.t1; pcri_g8718.t1; pcri_g8045.t1; pcri_g8716.t1	pcri_g8720.t1; pcri_g8718.t1; pcri_g8045.t1; pcri_g8716.t1	0	2	MS2	0.5407		0	200	1	51.0729	1	20171101_04.RAW	1350.29
		FALSE	High		Sequest HT (AD2)	Unambiguous	[R].WLLEGELYNGR.[LV]		4	4	pcri_g8720.t1; pcri_g8718.t1; pcri_g8045.t1; pcri_g8716.t1	pcri_g8720.t1; pcri_g8718.t1; pcri_g8045.t1; pcri_g8716.t1	0	2	MS2	0.5579		0	200	1	55.9145	1	20171101_10.RAW	1350.44
		FALSE	High		Sequest HT (AD2)	Unambiguous	[R].WLLEGELYNGR.[LV]		4	4	pcri_g8720.t1; pcri_g8718.t1; pcri_g8045.t1; pcri_g8716.t1	pcri_g8720.t1; pcri_g8718.t1; pcri_g8045.t1; pcri_g8716.t1	0	2	MS2	0.5079		0	200	1	39.0388	1	20171101_10.RAW	1350.22
		FALSE	High		Sequest HT (AJ2)	Unambiguous	[R].WLLEGELYNGR.[LV]		4	4	pcri_g8720.t1; pcri_g8718.t1; pcri_g8045.t1; pcri_g8716.t1	pcri_g8720.t1; pcri_g8718.t1; pcri_g8045.t1; pcri_g8716.t1	0	2	MS2	0.5053		0	200	1	47.7365	1	20171101_04.RAW	1350.4
		FALSE	High		Sequest HT (AI2)	Unambiguous	[R].WLLEGELYNGR.[LV]		4	4	pcri_g8720.t1; pcri_g8718.t1; pcri_g8045.t1; pcri_g8716.t1	pcri_g8720.t1; pcri_g8718.t1; pcri_g8045.t1; pcri_g8716.t1	0	2	MS2	0.5172		0	200	1	55.093	1	20171101_05.RAW	1350.69
		FALSE	High		Sequest HT (AG2)	Unambiguous	[R].WLLEGELYNGR.[LV]		4	4	pcri_g8720.t1; pcri_g8718.t1; pcri_g8045.t1; pcri_g8716.t1	pcri_g8720.t1; pcri_g8718.t1; pcri_g8045.t1; pcri_g8716.t1	0	2	MS2	0.4063		0	200	1	54.0326	1	20171101_07.RAW	1351.29
		FALSE	High		Sequest HT (AI2)	Unambiguous	[R].WLLEGELYNGR.[LV]		4	4	pcri_g8720.t1; pcri_g8718.t1; pcri_g8045.t1; pcri_g8716.t1	pcri_g8720.t1; pcri_g8718.t1; pcri_g8045.t1; pcri_g8716.t1	0	2	MS2	0.5251		0	200	1	57.9407	1	20171101_05.RAW	1350.3
		FALSE	High		Sequest HT (AJ2)	Unambiguous	[R].WLLEGELYNGR.[LV]		4	4	pcri_g8720.t1; pcri_g8718.t1; pcri_g8045.t1; pcri_g8716.t1	pcri_g8720.t1; pcri_g8718.t1; pcri_g8045.t1; pcri_g8716.t1	0	2	MS2	0.5805		0	200	1	49.4068	1	20171101_04.RAW	1350.42
		FALSE	High		Sequest HT (AD2)	Unambiguous	[R].WLLEGELYNGR.[LV]		4	4	pcri_g8720.t1; pcri_g8718.t1; pcri_g8045.t1; pcri_g8716.t1	pcri_g8720.t1; pcri_g8718.t1; pcri_g8045.t1; pcri_g8716.t1	0	2	MS2	0.5397		0	200	1	44.5966	1	20171101_10.RAW	1350.36
		FALSE	High		Sequest HT (AD2)	Unambiguous	[R].WLLEGELYNGR.[LV]		4	4	pcri_g8720.t1; pcri_g8718.t1; pcri_g8045.t1; pcri_g8716.t1	pcri_g8720.t1; pcri_g8718.t1; pcri_g8045.t1; pcri_g8716.t1	0	2	MS2	0.5358		0	200	1	45.881	1	20171101_10.RAW	1350.1
		FALSE	High		Sequest HT (AJ2)	Unambiguous	[R].WLLEGELYNGR.[LV]		4	4	pcri_g8720.t1; pcri_g8718.t1; pcri_g8045.t1; pcri_g8716.t1	pcri_g8720.t1; pcri_g8718.t1; pcri_g8045.t1; pcri_g8716.t1	0	2	MS2	0.5252		0	200	1	41.7283	1	20171101_04.RAW	1350.39
		FALSE	High		Sequest HT (AD2)	Unambiguous	[R].WLLEGELYNGR.[LV]		4	4	pcri_g8720.t1; pcri_g8718.t1; pcri_g8045.t1; pcri_g8716.t1	pcri_g8720.t1; pcri_g8718.t1; pcri_g8045.t1; pcri_g8716.t1	0	2	MS2	0.504		0	200	1	40.5439	1	20171101_10.RAW	1350.35
		FALSE	High		Sequest HT (AD2)	Unambiguous	[R].WLLEGELYNGR.[LV]		4	4	pcri_g8720.t1; pcri_g8718.t1; pcri_g8045.t1; pcri_g8716.t1	pcri_g8720.t1; pcri_g8718.t1; pcri_g8045.t1; pcri_g8716.t1	0	2	MS2	0.5305		0	200	1	37.9922	1	20171101_10.RAW	1350.68
		FALSE	High		Sequest HT (AJ2)	Unambiguous	[R].WLLEGELYNGR.[LV]		4	4	pcri_g8720.t1; pcri_g8718.t1; pcri_g8045.t1; pcri_g8716.t1	pcri_g8720.t1; pcri_g8718.t1; pcri_g8045.t1; pcri_g8716.t1	0	2	MS2	0.5213		0	200	1	44.86	1	20171101_04.RAW	1350.62
		FALSE	High		Sequest HT (S2)	Unambiguous	[R].WLLEGELYNGR.[LV]		4	4	pcri_g8720.t1; pcri_g8718.t1; pcri_g8045.t1; pcri_g8716.t1	pcri_g8720.t1; pcri_g8718.t1; pcri_g8045.t1; pcri_g8716.t1	0	2	MS2	0.5559		0	200	1	34.3522	1	20171202_02.RAW	1350.47
		FALSE	High		Sequest HT (AF2)	Unambiguous	[R].WLLEGELYNGR.[LV]		4	4	pcri_g8720.t1; pcri_g8718.t1; pcri_g8045.t1; pcri_g8716.t1	pcri_g8720.t1; pcri_g8718.t1; pcri_g8045.t1; pcri_g8716.t1	0	2	MS2	0.4827		0	200	1	35.0277	1	20171101_08.RAW	1350.71
		FALSE	High		Sequest HT (AL2)	Unambiguous	[R].WLLEGELYNGR.[LV]		4	4	pcri_g8720.t1; pcri_g8718.t1; pcri_g8045.t1; pcri_g8716.t1	pcri_g8720.t1; pcri_g8718.t1; pcri_g8045.t1; pcri_g8716.t1	0	2	MS2	0.4933		0	200	1	49.3603	1	20171101_02.RAW	1350.43
		FALSE	High		Sequest HT (AJ2)	Unambiguous	[R].WLLEGELYNGR.[LV]		4	4	pcri_g8720.t1; pcri_g8718.t1; pcri_g8045.t1; pcri_g8716.t1	pcri_g8720.t1; pcri_g8718.t1; pcri_g8045.t1; pcri_g8716.t1	0	2	MS2	0.52		0	200	1	48.3024	1	20171101_04.RAW	1350.66
		FALSE	High		Sequest HT (S2)	Unambiguous	[R].WLLEGELYNGR.[LV]		4	4	pcri_g8720.t1; pcri_g8718.t1; pcri_g8045.t1; pcri_g8716.t1	pcri_g8720.t1; pcri_g8718.t1; pcri_g8045.t1; pcri_g8716.t1	0	2	MS2	0.5867		0	200	1	31.8761	1	20171202_02.RAW	1349.76
		FALSE	High		Sequest HT (AD2)	Unambiguous	[R].WLLEGELYNGR.[LV]		4	4	pcri_g8720.t1; pcri_g8718.t1; pcri_g8045.t1; pcri_g8716.t1	pcri_g8720.t1; pcri_g8718.t1; pcri_g8045.t1; pcri_g8716.t1	0	2	MS2	0.4773		0	200	1	42.537	1	20171101_10.RAW	1350.56
		FALSE	High		Sequest HT (P2)	Unambiguous	[R].WLLEGELYNGR.[LV]		4	4	pcri_g8720.t1; pcri_g8718.t1; pcri_g8045.t1; pcri_g8716.t1	pcri_g8720.t1; pcri_g8718.t1; pcri_g8045.t1; pcri_g8716.t1	0	2	MS2	0.5228		0	200	1	32.7287	1	20171202_05.RAW	1349.8
		FALSE	High		Sequest HT (AD2)	Unambiguous	[R].WLLEGELYNGR.[LV]		4	4	pcri_g8720.t1; pcri_g8718.t1; pcri_g8045.t1; pcri_g8716.t1	pcri_g8720.t1; pcri_g8718.t1; pcri_g8045.t1; pcri_g8716.t1	0	2	MS2	0.5067		0	200	1	52.9822	1	20171101_10.RAW	1350.57
		FALSE	High		Sequest HT (V2)	Unambiguous	[R].WLLEGELYNGR.[LV]		4	4	pcri_g8720.t1; pcri_g8718.t1; pcri_g8045.t1; pcri_g8716.t1	pcri_g8720.t1; pcri_g8718.t1; pcri_g8045.t1; pcri_g8716.t1	0	2	MS2	0.5469		0	200	1	34.4113	1	20171101_blank08.RAW	1350.27
		FALSE	High		Sequest HT (AD2)	Unambiguous	[R].WLLEGELYNGR.[LV]		4	4	pcri_g8720.t1; pcri_g8718.t1; pcri_g8045.t1; pcri_g8716.t1	pcri_g8720.t1; pcri_g8718.t1; pcri_g8045.t1; pcri_g8716.t1	0	2	MS2	0.5121		0	200	1	46.4383	1	20171101_10.RAW	1350.28
		FALSE	High		Sequest HT (Y2)	Unambiguous	[R].WLLEGELYNGR.[LV]		4	4	pcri_g8720.t1; pcri_g8718.t1; pcri_g8045.t1; pcri_g8716.t1	pcri_g8720.t1; pcri_g8718.t1; pcri_g8045.t1; pcri_g8716.t1	0	2	MS2	0.4826		0	200	1	34.1611	1	20171101_blank05.RAW	1350.48
		FALSE	High		Sequest HT (T2)	Unambiguous	[R].WLLEGELYNGR.[LV]		4	4	pcri_g8720.t1; pcri_g8718.t1; pcri_g8045.t1; pcri_g8716.t1	pcri_g8720.t1; pcri_g8718.t1; pcri_g8045.t1; pcri_g8716.t1	0	2	MS2	0.5469		0	200	1	32.0976	1	20171202_01.RAW	1350.15
		FALSE	High		Sequest HT (AD2)	Unambiguous	[R].WLLEGELYNGR.[LV]		4	4	pcri_g8720.t1; pcri_g8718.t1; pcri_g8045.t1; pcri_g8716.t1	pcri_g8720.t1; pcri_g8718.t1; pcri_g8045.t1; pcri_g8716.t1	0	2	MS2	0.5469		0	200	1	45.2926	1	20171101_10.RAW	1350.55
		FALSE	High		Sequest HT (AJ2)	Unambiguous	[R].WLLEGELYNGR.[LV]		4	4	pcri_g8720.t1; pcri_g8718.t1; pcri_g8045.t1; pcri_g8716.t1	pcri_g8720.t1; pcri_g8718.t1; pcri_g8045.t1; pcri_g8716.t1	0	2	MS2	0.504		0	200	1	48.8502	1	20171101_04.RAW	1349.69
		FALSE	High		Sequest HT (AJ2)	Unambiguous	[R].WLLEGELYNGR.[LV]		4	4	pcri_g8720.t1; pcri_g8718.t1; pcri_g8045.t1; pcri_g8716.t1	pcri_g8720.t1; pcri_g8718.t1; pcri_g8045.t1; pcri_g8716.t1	0	2	MS2	0.4582		0	200	1	39.1736	1	20171101_04.RAW	1350.32
		FALSE	High		Sequest HT (AJ2)	Unambiguous	[R].WLLEGELYNGR.[LV]		4	4	pcri_g8720.t1; pcri_g8718.t1; pcri_g8045.t1; pcri_g8716.t1	pcri_g8720.t1; pcri_g8718.t1; pcri_g8045.t1; pcri_g8716.t1	0	2	MS2	0.566		0	200	1	53.396	1	20171101_04.RAW	1349.69
		FALSE	High		Sequest HT (AD2)	Unambiguous	[R].WLLEGELYNGR.[LV]		4	4	pcri_g8720.t1; pcri_g8718.t1; pcri_g8045.t1; pcri_g8716.t1	pcri_g8720.t1; pcri_g8718.t1; pcri_g8045.t1; pcri_g8716.t1	0	2	MS2	0.5175		0	200	1	52.4108	1	20171101_10.RAW	1350.35
		FALSE	High		Sequest HT (N2)	Unambiguous	[R].WLLEGELYNGR.[LV]		4	4	pcri_g8720.t1; pcri_g8718.t1; pcri_g8045.t1; pcri_g8716.t1	pcri_g8720.t1; pcri_g8718.t1; pcri_g8045.t1; pcri_g8716.t1	0	2	MS2	0.4744		0	200	1	32.6179	1	20171202_07.RAW	1350.44
		FALSE	High		Sequest HT (Q2)	Unambiguous	[R].WLLEGELYNGR.[LV]		4	4	pcri_g8720.t1; pcri_g8718.t1; pcri_g8045.t1; pcri_g8716.t1	pcri_g8720.t1; pcri_g8718.t1; pcri_g8045.t1; pcri_g8716.t1	0	2	MS2	0.4811		0	200	1	37.0128	1	20171202_04.RAW	1349.77
		FALSE	High		Sequest HT (AD2)	Unambiguous	[R].WLLEGELYNGR.[LV]		4	4	pcri_g8720.t1; pcri_g8718.t1; pcri_g8045.t1; pcri_g8716.t1	pcri_g8720.t1; pcri_g8718.t1; pcri_g8045.t1; pcri_g8716.t1	0	2	MS2	0.4905		0	200	1	41.9245	1	20171101_10.RAW	1350.94
		FALSE	High		Sequest HT (AD2)	Unambiguous	[R].WLLEGELYNGR.[LV]		4	4	pcri_g8720.t1; pcri_g8718.t1; pcri_g8045.t1; pcri_g8716.t1	pcri_g8720.t1; pcri_g8718.t1; pcri_g8045.t1; pcri_g8716.t1	0	2	MS2	0.4715		0	200	1	48.1727	1	20171101_10.RAW	1350.57
		FALSE	High		Sequest HT (AM2)	Unambiguous	[R].WLLEGELYNGR.[LV]		4	4	pcri_g8720.t1; pcri_g8718.t1; pcri_g8045.t1; pcri_g8716.t1	pcri_g8720.t1; pcri_g8718.t1; pcri_g8045.t1; pcri_g8716.t1	0	2	MS2	0.4634		0	200	1	35.0446	1	20171101_01.RAW	1351.39
		FALSE	High		Sequest HT (AL2)	Unambiguous	[R].WLLEGELYNGR.[LV]		4	4	pcri_g8720.t1; pcri_g8718.t1; pcri_g8045.t1; pcri_g8716.t1	pcri_g8720.t1; pcri_g8718.t1; pcri_g8045.t1; pcri_g8716.t1	0	2	MS2	0.4661		0	200	1	37.478	1	20171101_02.RAW	1350.77
		FALSE	High		Sequest HT (V2)	Unambiguous	[R].WLLEGELYNGR.[LV]		4	4	pcri_g8720.t1; pcri_g8718.t1; pcri_g8045.t1; pcri_g8716.t1	pcri_g8720.t1; pcri_g8718.t1; pcri_g8045.t1; pcri_g8716.t1	0	2	MS2	0.4824		0	200	1	34.9581	1	20171101_blank08.RAW	1350.99
		FALSE	High		Sequest HT (T2)	Unambiguous	[R].WLLEGELYNGR.[LV]		4	4	pcri_g8720.t1; pcri_g8718.t1; pcri_g8045.t1; pcri_g8716.t1	pcri_g8720.t1; pcri_g8718.t1; pcri_g8045.t1; pcri_g8716.t1	0	2	MS2	0.4864		0	200	1	32.6694	1	20171202_01.RAW	1350.16
		FALSE	High		Sequest HT (AF2)	Unambiguous	[R].WLLEGELYNGR.[LV]		4	4	pcri_g8720.t1; pcri_g8718.t1; pcri_g8045.t1; pcri_g8716.t1	pcri_g8720.t1; pcri_g8718.t1; pcri_g8045.t1; pcri_g8716.t1	0	2	MS2	0.4837		0	200	1	34.4368	1	20171101_08.RAW	1350.22
		FALSE	High		Sequest HT (AI2)	Unambiguous	[R].WLLEGELYNGR.[LV]		4	4	pcri_g8720.t1; pcri_g8718.t1; pcri_g8045.t1; pcri_g8716.t1	pcri_g8720.t1; pcri_g8718.t1; pcri_g8045.t1; pcri_g8716.t1	0	2	MS2	0.4293		0	200	1	49.7834	1	20171101_05.RAW	1350.41
		FALSE	High		Sequest HT (P2)	Unambiguous	[R].WLLEGELYNGR.[LV]		4	4	pcri_g8720.t1; pcri_g8718.t1; pcri_g8045.t1; pcri_g8716.t1	pcri_g8720.t1; pcri_g8718.t1; pcri_g8045.t1; pcri_g8716.t1	0	2	MS2	0.4523		0	200	1	32.2746	1	20171202_05.RAW	1353.3
		FALSE	High		Sequest HT (AJ2)	Unambiguous	[R].WLLEGELYNGR.[LV]		4	4	pcri_g8720.t1; pcri_g8718.t1; pcri_g8045.t1; pcri_g8716.t1	pcri_g8720.t1; pcri_g8718.t1; pcri_g8045.t1; pcri_g8716.t1	0	2	MS2	0.5313		0	200	1	37.0642	1	20171101_04.RAW	1350.38
		FALSE	High		Sequest HT (AJ2)	Unambiguous	[R].WLLEGELYNGR.[LV]		4	4	pcri_g8720.t1; pcri_g8718.t1; pcri_g8045.t1; pcri_g8716.t1	pcri_g8720.t1; pcri_g8718.t1; pcri_g8045.t1; pcri_g8716.t1	0	2	MS2	0.5341		0	200	1	52.8377	1	20171101_04.RAW	1350.32
		FALSE	High		Sequest HT (K2)	Unambiguous	[R].WLLEGELYNGR.[LV]		4	4	pcri_g8720.t1; pcri_g8718.t1; pcri_g8045.t1; pcri_g8716.t1	pcri_g8720.t1; pcri_g8718.t1; pcri_g8045.t1; pcri_g8716.t1	0	2	MS2	0.5273		0	200	1	41.591	1	20171202_10.RAW	1350.69
		FALSE	High		Sequest HT (AI2)	Unambiguous	[R].WLLEGELYNGR.[LV]		4	4	pcri_g8720.t1; pcri_g8718.t1; pcri_g8045.t1; pcri_g8716.t1	pcri_g8720.t1; pcri_g8718.t1; pcri_g8045.t1; pcri_g8716.t1	0	2	MS2	0.5055		0	200	1	50.4684	1	20171101_05.RAW	1351.38
		FALSE	High		Sequest HT (AL2)	Unambiguous	[R].WLLEGELYNGR.[LV]		4	4	pcri_g8720.t1; pcri_g8718.t1; pcri_g8045.t1; pcri_g8716.t1	pcri_g8720.t1; pcri_g8718.t1; pcri_g8045.t1; pcri_g8716.t1	0	2	MS2	0.541		0	200	1	50.6158	1	20171101_02.RAW	1350.33
		FALSE	High		Sequest HT (AG2)	Unambiguous	[R].WLLEGELYNGR.[LV]		4	4	pcri_g8720.t1; pcri_g8718.t1; pcri_g8045.t1; pcri_g8716.t1	pcri_g8720.t1; pcri_g8718.t1; pcri_g8045.t1; pcri_g8716.t1	0	2	MS2	0.4781		0	114.711	1	34.8453	1	20171101_07.RAW	1350.61
		FALSE	High		Sequest HT (AJ2)	Unambiguous	[R].WLLEGELYNGR.[LV]		4	4	pcri_g8720.t1; pcri_g8718.t1; pcri_g8045.t1; pcri_g8716.t1	pcri_g8720.t1; pcri_g8718.t1; pcri_g8045.t1; pcri_g8716.t1	0	2	MS2	0.5644		0	200	1	45.5126	1	20171101_04.RAW	1350.34
		FALSE	High		Sequest HT (Y2)	Unambiguous	[R].WLLEGELYNGR.[LV]		4	4	pcri_g8720.t1; pcri_g8718.t1; pcri_g8045.t1; pcri_g8716.t1	pcri_g8720.t1; pcri_g8718.t1; pcri_g8045.t1; pcri_g8716.t1	0	2	MS2	0.5829		0	200	1	52.1497	1	20171101_blank05.RAW	1350.21
		FALSE	High		Sequest HT (AI2)	Unambiguous	[R].WLLEGELYNGR.[LV]		4	4	pcri_g8720.t1; pcri_g8718.t1; pcri_g8045.t1; pcri_g8716.t1	pcri_g8720.t1; pcri_g8718.t1; pcri_g8045.t1; pcri_g8716.t1	0	2	MS2	0.5319		0	200	1	53.3675	1	20171101_05.RAW	1351.57
		FALSE	High		Sequest HT (AL2)	Unambiguous	[R].WLLEGELYNGR.[LV]		4	4	pcri_g8720.t1; pcri_g8718.t1; pcri_g8045.t1; pcri_g8716.t1	pcri_g8720.t1; pcri_g8718.t1; pcri_g8045.t1; pcri_g8716.t1	0	2	MS2	0.5014		0	200	1	45.7371	1	20171101_02.RAW	1350.51
		FALSE	High		Sequest HT (K2)	Unambiguous	[R].WLLEGELYNGR.[LV]		4	4	pcri_g8720.t1; pcri_g8718.t1; pcri_g8045.t1; pcri_g8716.t1	pcri_g8720.t1; pcri_g8718.t1; pcri_g8045.t1; pcri_g8716.t1	0	2	MS2	0.3482		0	81.273	1	32.272	1	20171202_10.RAW	1353.63
		FALSE	High		Sequest HT (AG2)	Unambiguous	[R].WLLEGELYNGR.[LV]		4	4	pcri_g8720.t1; pcri_g8718.t1; pcri_g8045.t1; pcri_g8716.t1	pcri_g8720.t1; pcri_g8718.t1; pcri_g8045.t1; pcri_g8716.t1	0	2	MS2	0.546		0	200	1	51.1083	1	20171101_07.RAW	1350.59
		FALSE	High		Sequest HT (AG2)	Unambiguous	[R].WLLEGELYNGR.[LV]		4	4	pcri_g8720.t1; pcri_g8718.t1; pcri_g8045.t1; pcri_g8716.t1	pcri_g8720.t1; pcri_g8718.t1; pcri_g8045.t1; pcri_g8716.t1	0	2	MS2	0.4944		0	200	1	59.868	1	20171101_07.RAW	1351
		FALSE	High		Sequest HT (S2)	Unambiguous	[R].WLLEGELYNGR.[LV]		4	4	pcri_g8720.t1; pcri_g8718.t1; pcri_g8045.t1; pcri_g8716.t1	pcri_g8720.t1; pcri_g8718.t1; pcri_g8045.t1; pcri_g8716.t1	0	2	MS2	0.567		0	200	1	33.5843	1	20171202_02.RAW	1350.48
		FALSE	High		Sequest HT (AJ2)	Unambiguous	[R].WLLEGELYNGR.[LV]		4	4	pcri_g8720.t1; pcri_g8718.t1; pcri_g8045.t1; pcri_g8716.t1	pcri_g8720.t1; pcri_g8718.t1; pcri_g8045.t1; pcri_g8716.t1	0	2	MS2	0.5251		0	200	1	52.2161	1	20171101_04.RAW	1350.41
		FALSE	High		Sequest HT (AJ2)	Unambiguous	[R].WLLEGELYNGR.[LV]		4	4	pcri_g8720.t1; pcri_g8718.t1; pcri_g8045.t1; pcri_g8716.t1	pcri_g8720.t1; pcri_g8718.t1; pcri_g8045.t1; pcri_g8716.t1	0	2	MS2	0.5182		0	200	1	55.0383	1	20171101_04.RAW	1350.48
		FALSE	High		Sequest HT (N2)	Unambiguous	[R].WLLEGELYNGR.[LV]		4	4	pcri_g8720.t1; pcri_g8718.t1; pcri_g8045.t1; pcri_g8716.t1	pcri_g8720.t1; pcri_g8718.t1; pcri_g8045.t1; pcri_g8716.t1	0	2	MS2	0.3585		0	200	1	32.0663	1	20171202_07.RAW	1353.46
		FALSE	High		Sequest HT (Y2)	Unambiguous	[R].WLLEGELYNGR.[LV]		4	4	pcri_g8720.t1; pcri_g8718.t1; pcri_g8045.t1; pcri_g8716.t1	pcri_g8720.t1; pcri_g8718.t1; pcri_g8045.t1; pcri_g8716.t1	0	2	MS2	0.4494		0	200	1	49.3232	1	20171101_blank05.RAW	1351.02
		FALSE	High		Sequest HT (AI2)	Unambiguous	[R].WLLEGELYNGR.[LV]		4	4	pcri_g8720.t1; pcri_g8718.t1; pcri_g8045.t1; pcri_g8716.t1	pcri_g8720.t1; pcri_g8718.t1; pcri_g8045.t1; pcri_g8716.t1	0	2	MS2	0.486		0	200	1	46.8873	1	20171101_05.RAW	1351.51
		FALSE	High		Sequest HT (AI2)	Unambiguous	[R].WLLEGELYNGR.[LV]		4	4	pcri_g8720.t1; pcri_g8718.t1; pcri_g8045.t1; pcri_g8716.t1	pcri_g8720.t1; pcri_g8718.t1; pcri_g8045.t1; pcri_g8716.t1	0	2	MS2	0.5424		0	200	1	51.0367	1	20171101_05.RAW	1350.07
		FALSE	High		Sequest HT (AI2)	Unambiguous	[R].WLLEGELYNGR.[LV]		4	4	pcri_g8720.t1; pcri_g8718.t1; pcri_g8045.t1; pcri_g8716.t1	pcri_g8720.t1; pcri_g8718.t1; pcri_g8045.t1; pcri_g8716.t1	0	2	MS2	0.5326		0	200	1	43.897	1	20171101_05.RAW	1350.68
		FALSE	High		Sequest HT (AD2)	Unambiguous	[R].WLLEGELYNGR.[LV]		4	4	pcri_g8720.t1; pcri_g8718.t1; pcri_g8045.t1; pcri_g8716.t1	pcri_g8720.t1; pcri_g8718.t1; pcri_g8045.t1; pcri_g8716.t1	0	2	MS2	0.4972		0	200	1	56.554	1	20171101_10.RAW	1350.49
		FALSE	High		Sequest HT (AI2)	Unambiguous	[R].WLLEGELYNGR.[LV]		4	4	pcri_g8720.t1; pcri_g8718.t1; pcri_g8045.t1; pcri_g8716.t1	pcri_g8720.t1; pcri_g8718.t1; pcri_g8045.t1; pcri_g8716.t1	0	2	MS2	0.49		0	200	1	47.4804	1	20171101_05.RAW	1350.57
		FALSE	High		Sequest HT (Y2)	Unambiguous	[R].WLLEGELYNGR.[LV]		4	4	pcri_g8720.t1; pcri_g8718.t1; pcri_g8045.t1; pcri_g8716.t1	pcri_g8720.t1; pcri_g8718.t1; pcri_g8045.t1; pcri_g8716.t1	0	2	MS2	0.5328		0	200	1	53.6679	1	20171101_blank05.RAW	1351.92
		FALSE	High		Sequest HT (AD2)	Unambiguous	[R].WLLEGELYNGR.[LV]		4	4	pcri_g8720.t1; pcri_g8718.t1; pcri_g8045.t1; pcri_g8716.t1	pcri_g8720.t1; pcri_g8718.t1; pcri_g8045.t1; pcri_g8716.t1	0	2	MS2	0.5086		0	200	1	41.1383	1	20171101_10.RAW	1349.97
		FALSE	High		Sequest HT (AH2)	Unambiguous	[R].WLLEGELYNGR.[LV]		4	4	pcri_g8720.t1; pcri_g8718.t1; pcri_g8045.t1; pcri_g8716.t1	pcri_g8720.t1; pcri_g8718.t1; pcri_g8045.t1; pcri_g8716.t1	0	2	MS2	0.51		0	200	1	34.3568	1	20171101_06.RAW	1350.28
		FALSE	High		Sequest HT (AL2)	Unambiguous	[R].WLLEGELYNGR.[LV]		4	4	pcri_g8720.t1; pcri_g8718.t1; pcri_g8045.t1; pcri_g8716.t1	pcri_g8720.t1; pcri_g8718.t1; pcri_g8045.t1; pcri_g8716.t1	0	2	MS2	0.4613		0	200	1	48.1687	1	20171101_02.RAW	1351.36
		FALSE	High		Sequest HT (AL2)	Unambiguous	[R].WLLEGELYNGR.[LV]		4	4	pcri_g8720.t1; pcri_g8718.t1; pcri_g8045.t1; pcri_g8716.t1	pcri_g8720.t1; pcri_g8718.t1; pcri_g8045.t1; pcri_g8716.t1	0	2	MS2	0.4682		0	200	1	44.252	1	20171101_02.RAW	1350.78
		FALSE	High		Sequest HT (AL2)	Unambiguous	[R].WLLEGELYNGR.[LV]		4	4	pcri_g8720.t1; pcri_g8718.t1; pcri_g8045.t1; pcri_g8716.t1	pcri_g8720.t1; pcri_g8718.t1; pcri_g8045.t1; pcri_g8716.t1	0	2	MS2	0.5159		0	200	1	58.5245	1	20171101_02.RAW	1350.58
		FALSE	High		Sequest HT (T2)	Unambiguous	[R].WLLEGELYNGR.[LV]		4	4	pcri_g8720.t1; pcri_g8718.t1; pcri_g8045.t1; pcri_g8716.t1	pcri_g8720.t1; pcri_g8718.t1; pcri_g8045.t1; pcri_g8716.t1	0	2	MS2	0.3681		0	200	1	32.2705	1	20171202_01.RAW	1353.33
		FALSE	High		Sequest HT (AA2)	Unambiguous	[R].WLLEGELYNGR.[LV]		4	4	pcri_g8720.t1; pcri_g8718.t1; pcri_g8045.t1; pcri_g8716.t1	pcri_g8720.t1; pcri_g8718.t1; pcri_g8045.t1; pcri_g8716.t1	0	2	MS2	0.4315		0	200	1	34.2053	1	20171101_blank03.RAW	1350.63
		FALSE	High		Sequest HT (AI2)	Unambiguous	[R].WLLEGELYNGR.[LV]		4	4	pcri_g8720.t1; pcri_g8718.t1; pcri_g8045.t1; pcri_g8716.t1	pcri_g8720.t1; pcri_g8718.t1; pcri_g8045.t1; pcri_g8716.t1	0	2	MS2	0.5409		0	200	1	37.7874	1	20171101_05.RAW	1350.4
		FALSE	High		Sequest HT (AJ2)	Unambiguous	[R].WLLEGELYNGR.[LV]		4	4	pcri_g8720.t1; pcri_g8718.t1; pcri_g8045.t1; pcri_g8716.t1	pcri_g8720.t1; pcri_g8718.t1; pcri_g8045.t1; pcri_g8716.t1	0	2	MS2	0.5263		0	200	1	38.4521	1	20171101_04.RAW	1350.06
		FALSE	High		Sequest HT (AI2)	Unambiguous	[R].WLLEGELYNGR.[LV]		4	4	pcri_g8720.t1; pcri_g8718.t1; pcri_g8045.t1; pcri_g8716.t1	pcri_g8720.t1; pcri_g8718.t1; pcri_g8045.t1; pcri_g8716.t1	0	2	MS2	0.4897		0	200	1	57.3494	1	20171101_05.RAW	1350.61
		FALSE	High		Sequest HT (AD2)	Unambiguous	[R].WLLEGELYNGR.[LV]		4	4	pcri_g8720.t1; pcri_g8718.t1; pcri_g8045.t1; pcri_g8716.t1	pcri_g8720.t1; pcri_g8718.t1; pcri_g8045.t1; pcri_g8716.t1	0	2	MS2	0.4721		0	200	1	53.5364	1	20171101_10.RAW	1350.55
		FALSE	High		Sequest HT (AL2)	Unambiguous	[R].WLLEGELYNGR.[LV]		4	4	pcri_g8720.t1; pcri_g8718.t1; pcri_g8045.t1; pcri_g8716.t1	pcri_g8720.t1; pcri_g8718.t1; pcri_g8045.t1; pcri_g8716.t1	0	2	MS2	0.5601		0	200	1	46.4586	1	20171101_02.RAW	1350.25
		FALSE	High		Sequest HT (AJ2)	Unambiguous	[R].WLLEGELYNGR.[LV]		4	4	pcri_g8720.t1; pcri_g8718.t1; pcri_g8045.t1; pcri_g8716.t1	pcri_g8720.t1; pcri_g8718.t1; pcri_g8045.t1; pcri_g8716.t1	0	2	MS2	0.5455		0	200	1	35.8544	1	20171101_04.RAW	1349.8
		FALSE	High		Sequest HT (AL2)	Unambiguous	[R].WLLEGELYNGR.[LV]		4	4	pcri_g8720.t1; pcri_g8718.t1; pcri_g8045.t1; pcri_g8716.t1	pcri_g8720.t1; pcri_g8718.t1; pcri_g8045.t1; pcri_g8716.t1	0	2	MS2	0.5634		0	200	1	57.3633	1	20171101_02.RAW	1350.11
		FALSE	High		Sequest HT (AI2)	Unambiguous	[R].WLLEGELYNGR.[LV]		4	4	pcri_g8720.t1; pcri_g8718.t1; pcri_g8045.t1; pcri_g8716.t1	pcri_g8720.t1; pcri_g8718.t1; pcri_g8045.t1; pcri_g8716.t1	0	2	MS2	0.5207		0	200	1	48.6388	1	20171101_05.RAW	1350.28
		FALSE	High		Sequest HT (AL2)	Unambiguous	[R].WLLEGELYNGR.[LV]		4	4	pcri_g8720.t1; pcri_g8718.t1; pcri_g8045.t1; pcri_g8716.t1	pcri_g8720.t1; pcri_g8718.t1; pcri_g8045.t1; pcri_g8716.t1	0	2	MS2	0.5118		0	200	1	59.2775	1	20171101_02.RAW	1350.16
		FALSE	High		Sequest HT (AI2)	Unambiguous	[R].WLLEGELYNGR.[LV]		4	4	pcri_g8720.t1; pcri_g8718.t1; pcri_g8045.t1; pcri_g8716.t1	pcri_g8720.t1; pcri_g8718.t1; pcri_g8045.t1; pcri_g8716.t1	0	2	MS2	0.4645		0	200	1	39.3511	1	20171101_05.RAW	1350.58
		FALSE	High		Sequest HT (AD2)	Unambiguous	[R].WLLEGELYNGR.[LV]		4	4	pcri_g8720.t1; pcri_g8718.t1; pcri_g8045.t1; pcri_g8716.t1	pcri_g8720.t1; pcri_g8718.t1; pcri_g8045.t1; pcri_g8716.t1	0	2	MS2	0.5193		0	200	1	49.8984	1	20171101_10.RAW	1350.22
		FALSE	High		Sequest HT (K2)	Unambiguous	[R].WLLEGELYNGR.[LV]		4	4	pcri_g8720.t1; pcri_g8718.t1; pcri_g8045.t1; pcri_g8716.t1	pcri_g8720.t1; pcri_g8718.t1; pcri_g8045.t1; pcri_g8716.t1	0	2	MS2	0.5519		0	200	1	57.9671	1	20171202_10.RAW	1351.73
		FALSE	High		Sequest HT (X2)	Unambiguous	[R].WLLEGELYNGR.[LV]		4	4	pcri_g8720.t1; pcri_g8718.t1; pcri_g8045.t1; pcri_g8716.t1	pcri_g8720.t1; pcri_g8718.t1; pcri_g8045.t1; pcri_g8716.t1	0	2	MS2	0.4718		0	200	1	34.4587	1	20171101_blank06.RAW	1350.48
		FALSE	High		Sequest HT (AJ2)	Unambiguous	[R].WLLEGELYNGR.[LV]		4	4	pcri_g8720.t1; pcri_g8718.t1; pcri_g8045.t1; pcri_g8716.t1	pcri_g8720.t1; pcri_g8718.t1; pcri_g8045.t1; pcri_g8716.t1	0	2	MS2	0.3798		0	200	1	56.697	1	20171101_04.RAW	1350.77
		FALSE	High		Sequest HT (AL2)	Unambiguous	[R].WLLEGELYNGR.[LV]		4	4	pcri_g8720.t1; pcri_g8718.t1; pcri_g8045.t1; pcri_g8716.t1	pcri_g8720.t1; pcri_g8718.t1; pcri_g8045.t1; pcri_g8716.t1	0	2	MS2	0.5433		0	200	1	51.1841	1	20171101_02.RAW	1350.55
		FALSE	High		Sequest HT (Y2)	Unambiguous	[R].WLLEGELYNGR.[LV]		4	4	pcri_g8720.t1; pcri_g8718.t1; pcri_g8045.t1; pcri_g8716.t1	pcri_g8720.t1; pcri_g8718.t1; pcri_g8045.t1; pcri_g8716.t1	0	2	MS2	0.4388		0	200	1	52.7075	1	20171101_blank05.RAW	1350.52
		FALSE	High		Sequest HT (AI2)	Unambiguous	[R].WLLEGELYNGR.[LV]		4	4	pcri_g8720.t1; pcri_g8718.t1; pcri_g8045.t1; pcri_g8716.t1	pcri_g8720.t1; pcri_g8718.t1; pcri_g8045.t1; pcri_g8716.t1	0	2	MS2	0.503		0	200	1	43.1652	1	20171101_05.RAW	1350.32
		FALSE	High		Sequest HT (AI2)	Unambiguous	[R].WLLEGELYNGR.[LV]		4	4	pcri_g8720.t1; pcri_g8718.t1; pcri_g8045.t1; pcri_g8716.t1	pcri_g8720.t1; pcri_g8718.t1; pcri_g8045.t1; pcri_g8716.t1	0	2	MS2	0.491		0	200	1	55.6527	1	20171101_05.RAW	1350.26
		FALSE	High		Sequest HT (AJ2)	Unambiguous	[R].WLLEGELYNGR.[LV]		4	4	pcri_g8720.t1; pcri_g8718.t1; pcri_g8045.t1; pcri_g8716.t1	pcri_g8720.t1; pcri_g8718.t1; pcri_g8045.t1; pcri_g8716.t1	0	2	MS2	0.4127		0	200	1	56.1474	1	20171101_04.RAW	1351.33
		FALSE	High		Sequest HT (AL2)	Unambiguous	[R].WLLEGELYNGR.[LV]		4	4	pcri_g8720.t1; pcri_g8718.t1; pcri_g8045.t1; pcri_g8716.t1	pcri_g8720.t1; pcri_g8718.t1; pcri_g8045.t1; pcri_g8716.t1	0	2	MS2	0.497		0	200	1	57.9659	1	20171101_02.RAW	1350.24
		FALSE	High		Sequest HT (AL2)	Unambiguous	[R].WLLEGELYNGR.[LV]		4	4	pcri_g8720.t1; pcri_g8718.t1; pcri_g8045.t1; pcri_g8716.t1	pcri_g8720.t1; pcri_g8718.t1; pcri_g8045.t1; pcri_g8716.t1	0	2	MS2	0.4036		0	200	1	48.7211	1	20171101_02.RAW	1351.14
		FALSE	High		Sequest HT (AL2)	Unambiguous	[R].WLLEGELYNGR.[LV]		4	4	pcri_g8720.t1; pcri_g8718.t1; pcri_g8045.t1; pcri_g8716.t1	pcri_g8720.t1; pcri_g8718.t1; pcri_g8045.t1; pcri_g8716.t1	0	2	MS2	0.4048		0	200	1	52.4687	1	20171101_02.RAW	1350.69
		FALSE	High		Sequest HT (AJ2)	Unambiguous	[R].WLLEGELYNGR.[LV]		4	4	pcri_g8720.t1; pcri_g8718.t1; pcri_g8045.t1; pcri_g8716.t1	pcri_g8720.t1; pcri_g8718.t1; pcri_g8045.t1; pcri_g8716.t1	0	2	MS2	0.4894		0	200	1	54.4902	1	20171101_04.RAW	1350.48
		FALSE	High		Sequest HT (AF2)	Unambiguous	[R].WLLEGELYNGR.[LV]		4	4	pcri_g8720.t1; pcri_g8718.t1; pcri_g8045.t1; pcri_g8716.t1	pcri_g8720.t1; pcri_g8718.t1; pcri_g8045.t1; pcri_g8716.t1	0	2	MS2	0.4772		0	200	1	59.0513	1	20171101_08.RAW	1351.42
		FALSE	High		Sequest HT (AL2)	Unambiguous	[R].WLLEGELYNGR.[LV]		4	4	pcri_g8720.t1; pcri_g8718.t1; pcri_g8045.t1; pcri_g8716.t1	pcri_g8720.t1; pcri_g8718.t1; pcri_g8045.t1; pcri_g8716.t1	0	2	MS2	0.5106		0	200	1	44.9587	1	20171101_02.RAW	1350
		FALSE	High		Sequest HT (AI2)	Unambiguous	[R].WLLEGELYNGR.[LV]		4	4	pcri_g8720.t1; pcri_g8718.t1; pcri_g8045.t1; pcri_g8716.t1	pcri_g8720.t1; pcri_g8718.t1; pcri_g8045.t1; pcri_g8716.t1	0	2	MS2	0.5653		0	200	1	48.076	1	20171101_05.RAW	1349.86
		FALSE	High		Sequest HT (AI2)	Unambiguous	[R].WLLEGELYNGR.[LV]		4	4	pcri_g8720.t1; pcri_g8718.t1; pcri_g8045.t1; pcri_g8716.t1	pcri_g8720.t1; pcri_g8718.t1; pcri_g8045.t1; pcri_g8716.t1	0	2	MS2	0.5745		0	200	1	51.5892	1	20171101_05.RAW	1349.92
		FALSE	High		Sequest HT (AF2)	Unambiguous	[R].WLLEGELYNGR.[LV]		4	4	pcri_g8720.t1; pcri_g8718.t1; pcri_g8045.t1; pcri_g8716.t1	pcri_g8720.t1; pcri_g8718.t1; pcri_g8045.t1; pcri_g8716.t1	0	2	MS2	0.465		0	200	1	57.5083	1	20171101_08.RAW	1349.92
		FALSE	High		Sequest HT (Y2)	Unambiguous	[R].WLLEGELYNGR.[LV]		4	4	pcri_g8720.t1; pcri_g8718.t1; pcri_g8045.t1; pcri_g8716.t1	pcri_g8720.t1; pcri_g8718.t1; pcri_g8045.t1; pcri_g8716.t1	0	2	MS2	0.5732		0	200	1	42.7013	1	20171101_blank05.RAW	1350.76
		FALSE	High		Sequest HT (AM2)	Unambiguous	[R].WLLEGELYNGR.[LV]		4	4	pcri_g8720.t1; pcri_g8718.t1; pcri_g8045.t1; pcri_g8716.t1	pcri_g8720.t1; pcri_g8718.t1; pcri_g8045.t1; pcri_g8716.t1	0	2	MS2	0.5549		0	200	1	52.3152	1	20171101_01.RAW	1350.48
		FALSE	High		Sequest HT (AJ2)	Unambiguous	[R].WLLEGELYNGR.[LV]		4	4	pcri_g8720.t1; pcri_g8718.t1; pcri_g8045.t1; pcri_g8716.t1	pcri_g8720.t1; pcri_g8718.t1; pcri_g8045.t1; pcri_g8716.t1	0	2	MS2	0.5535		0	200	1	42.899	1	20171101_04.RAW	1349.87
		FALSE	High		Sequest HT (AF2)	Unambiguous	[R].WLLEGELYNGR.[LV]		4	4	pcri_g8720.t1; pcri_g8718.t1; pcri_g8045.t1; pcri_g8716.t1	pcri_g8720.t1; pcri_g8718.t1; pcri_g8045.t1; pcri_g8716.t1	0	2	MS2	0.4202		0	200	1	56.851	1	20171101_08.RAW	1352.11
		FALSE	High		Sequest HT (AI2)	Unambiguous	[R].WLLEGELYNGR.[LV]		4	4	pcri_g8720.t1; pcri_g8718.t1; pcri_g8045.t1; pcri_g8716.t1	pcri_g8720.t1; pcri_g8718.t1; pcri_g8045.t1; pcri_g8716.t1	0	2	MS2	0.3098		0	200	1	34.1509	1	20171101_05.RAW	1353.62
		FALSE	High		Sequest HT (AB2)	Unambiguous	[R].WLLEGELYNGR.[LV]		4	4	pcri_g8720.t1; pcri_g8718.t1; pcri_g8045.t1; pcri_g8716.t1	pcri_g8720.t1; pcri_g8718.t1; pcri_g8045.t1; pcri_g8716.t1	0	2	MS2	0.5463		0	200	1	34.5186	1	20171101_blank02.RAW	1349.72
		FALSE	High		Sequest HT (AI2)	Unambiguous	[R].WLLEGELYNGR.[LV]		4	4	pcri_g8720.t1; pcri_g8718.t1; pcri_g8045.t1; pcri_g8716.t1	pcri_g8720.t1; pcri_g8718.t1; pcri_g8045.t1; pcri_g8716.t1	0	2	MS2	0.5216		0	200	1	59.1672	1	20171101_05.RAW	1350.49
		FALSE	High		Sequest HT (AI2)	Unambiguous	[R].WLLEGELYNGR.[LV]		4	4	pcri_g8720.t1; pcri_g8718.t1; pcri_g8045.t1; pcri_g8716.t1	pcri_g8720.t1; pcri_g8718.t1; pcri_g8045.t1; pcri_g8716.t1	0	2	MS2	0.534		0	200	1	34.0752	1	20171101_05.RAW	1349.53
		FALSE	High		Sequest HT (Y2)	Unambiguous	[R].WLLEGELYNGR.[LV]		4	4	pcri_g8720.t1; pcri_g8718.t1; pcri_g8045.t1; pcri_g8716.t1	pcri_g8720.t1; pcri_g8718.t1; pcri_g8045.t1; pcri_g8716.t1	0	2	MS2	0.5108		0	200	1	35.3204	1	20171101_blank05.RAW	1350.78
		FALSE	High		Sequest HT (AD2)	Unambiguous	[R].WLLEGELYNGR.[LV]		4	4	pcri_g8720.t1; pcri_g8718.t1; pcri_g8045.t1; pcri_g8716.t1	pcri_g8720.t1; pcri_g8718.t1; pcri_g8045.t1; pcri_g8716.t1	0	2	MS2	0.5759		0	200	1	57.1068	1	20171101_10.RAW	1349.59
		FALSE	High		Sequest HT (AI2)	Unambiguous	[R].WLLEGELYNGR.[LV]		4	4	pcri_g8720.t1; pcri_g8718.t1; pcri_g8045.t1; pcri_g8716.t1	pcri_g8720.t1; pcri_g8718.t1; pcri_g8045.t1; pcri_g8716.t1	0	2	MS2	0.4534		0	200	1	52.2228	1	20171101_05.RAW	1350.82
		FALSE	High		Sequest HT (AI2)	Unambiguous	[R].WLLEGELYNGR.[LV]		4	4	pcri_g8720.t1; pcri_g8718.t1; pcri_g8045.t1; pcri_g8716.t1	pcri_g8720.t1; pcri_g8718.t1; pcri_g8045.t1; pcri_g8716.t1	0	2	MS2	0.5248		0	200	1	53.9521	1	20171101_05.RAW	1349.43
		FALSE	High		Sequest HT (V2)	Unambiguous	[R].WLLEGELYNGR.[LV]		4	4	pcri_g8720.t1; pcri_g8718.t1; pcri_g8045.t1; pcri_g8716.t1	pcri_g8720.t1; pcri_g8718.t1; pcri_g8045.t1; pcri_g8716.t1	0	2	MS2	0.4611		0	200	1	50.6745	1	20171101_blank08.RAW	1350.36
		FALSE	High		Sequest HT (AL2)	Unambiguous	[R].WLLEGELYNGR.[LV]		4	4	pcri_g8720.t1; pcri_g8718.t1; pcri_g8045.t1; pcri_g8716.t1	pcri_g8720.t1; pcri_g8718.t1; pcri_g8045.t1; pcri_g8716.t1	0	2	MS2	0.5358		0	200	1	53.1406	1	20171101_02.RAW	1349.76
		FALSE	High		Sequest HT (AJ2)	Unambiguous	[R].WLLEGELYNGR.[LV]		4	4	pcri_g8720.t1; pcri_g8718.t1; pcri_g8045.t1; pcri_g8716.t1	pcri_g8720.t1; pcri_g8718.t1; pcri_g8045.t1; pcri_g8716.t1	0	2	MS2	0.4151		0	200	1	50.5172	1	20171101_04.RAW	1352.42
		FALSE	High		Sequest HT (Y2)	Unambiguous	[R].WLLEGELYNGR.[LV]		4	4	pcri_g8720.t1; pcri_g8718.t1; pcri_g8045.t1; pcri_g8716.t1	pcri_g8720.t1; pcri_g8718.t1; pcri_g8045.t1; pcri_g8716.t1	0	2	MS2	0.5047		0	200	1	55.1593	1	20171101_blank05.RAW	1350.52
		FALSE	High		Sequest HT (AL2)	Unambiguous	[R].WLLEGELYNGR.[LV]		4	4	pcri_g8720.t1; pcri_g8718.t1; pcri_g8045.t1; pcri_g8716.t1	pcri_g8720.t1; pcri_g8718.t1; pcri_g8045.t1; pcri_g8716.t1	0	2	MS2	0.5047		0	200	1	40.2524	1	20171101_02.RAW	1350.37
		FALSE	High		Sequest HT (AI2)	Unambiguous	[R].WLLEGELYNGR.[LV]		4	4	pcri_g8720.t1; pcri_g8718.t1; pcri_g8045.t1; pcri_g8716.t1	pcri_g8720.t1; pcri_g8718.t1; pcri_g8045.t1; pcri_g8716.t1	0	2	MS2	0.3956		0	200	1	54.5442	1	20171101_05.RAW	1351.32
		FALSE	High		Sequest HT (Y2)	Unambiguous	[R].WLLEGELYNGR.[LV]		4	4	pcri_g8720.t1; pcri_g8718.t1; pcri_g8045.t1; pcri_g8716.t1	pcri_g8720.t1; pcri_g8718.t1; pcri_g8045.t1; pcri_g8716.t1	0	2	MS2	0.519		0	200	1	51.4542	1	20171101_blank05.RAW	1350.31
		FALSE	High		Sequest HT (AI2)	Unambiguous	[R].WLLEGELYNGR.[LV]		4	4	pcri_g8720.t1; pcri_g8718.t1; pcri_g8045.t1; pcri_g8716.t1	pcri_g8720.t1; pcri_g8718.t1; pcri_g8045.t1; pcri_g8716.t1	0	2	MS2	0.5079		0	200	1	56.798	1	20171101_05.RAW	1349.86
		FALSE	High		Sequest HT (AM2)	Unambiguous	[R].WLLEGELYNGR.[LV]		4	4	pcri_g8720.t1; pcri_g8718.t1; pcri_g8045.t1; pcri_g8716.t1	pcri_g8720.t1; pcri_g8718.t1; pcri_g8045.t1; pcri_g8716.t1	0	2	MS2	0.465		0	200	1	59.3879	1	20171101_01.RAW	1350.77
		FALSE	High		Sequest HT (AI2)	Unambiguous	[R].WLLEGELYNGR.[LV]		4	4	pcri_g8720.t1; pcri_g8718.t1; pcri_g8045.t1; pcri_g8716.t1	pcri_g8720.t1; pcri_g8718.t1; pcri_g8045.t1; pcri_g8716.t1	0	2	MS2	0.5911		0	200	1	40.9799	1	20171101_05.RAW	1350.08
		FALSE	High		Sequest HT (AI2)	Unambiguous	[R].WLLEGELYNGR.[LV]		4	4	pcri_g8720.t1; pcri_g8718.t1; pcri_g8045.t1; pcri_g8716.t1	pcri_g8720.t1; pcri_g8718.t1; pcri_g8045.t1; pcri_g8716.t1	0	2	MS2	0.4231		0	200	1	49.2368	1	20171101_05.RAW	1349.96
		FALSE	High		Sequest HT (AL2)	Unambiguous	[R].WLLEGELYNGR.[LV]		4	4	pcri_g8720.t1; pcri_g8718.t1; pcri_g8045.t1; pcri_g8716.t1	pcri_g8720.t1; pcri_g8718.t1; pcri_g8045.t1; pcri_g8716.t1	0	2	MS2	0.4968		0	200	1	53.7656	1	20171101_02.RAW	1350.27
		FALSE	High		Sequest HT (M2)	Unambiguous	[R].WLLEGELYNGR.[LV]		4	4	pcri_g8720.t1; pcri_g8718.t1; pcri_g8045.t1; pcri_g8716.t1	pcri_g8720.t1; pcri_g8718.t1; pcri_g8045.t1; pcri_g8716.t1	0	2	MS2	0.4194		0	200	1	32.8844	1	20171202_08.RAW	1351.26
		FALSE	High		Sequest HT (AF2)	Unambiguous	[R].WLLEGELYNGR.[LV]		4	4	pcri_g8720.t1; pcri_g8718.t1; pcri_g8045.t1; pcri_g8716.t1	pcri_g8720.t1; pcri_g8718.t1; pcri_g8045.t1; pcri_g8716.t1	0	2	MS2	0.3871		0	200	1	50.9513	1	20171101_08.RAW	1351.45
		FALSE	High		Sequest HT (AI2)	Unambiguous	[R].WLLEGELYNGR.[LV]		4	4	pcri_g8720.t1; pcri_g8718.t1; pcri_g8045.t1; pcri_g8716.t1	pcri_g8720.t1; pcri_g8718.t1; pcri_g8045.t1; pcri_g8716.t1	0	2	MS2	0.5097		0	200	1	40.2575	1	20171101_05.RAW	1349.66
		FALSE	High		Sequest HT (P2)	Unambiguous	[R].WLLEGELYNGR.[LV]		4	4	pcri_g8720.t1; pcri_g8718.t1; pcri_g8045.t1; pcri_g8716.t1	pcri_g8720.t1; pcri_g8718.t1; pcri_g8045.t1; pcri_g8716.t1	0	2	MS2	0.3824		0	200	1	62.805	1	20171202_05.RAW	1351.35
		FALSE	High		Sequest HT (AF2)	Unambiguous	[R].WLLEGELYNGR.[LV]		4	4	pcri_g8720.t1; pcri_g8718.t1; pcri_g8045.t1; pcri_g8716.t1	pcri_g8720.t1; pcri_g8718.t1; pcri_g8045.t1; pcri_g8716.t1	0	2	MS2	0.5784		0	200	1	58.451	1	20171101_08.RAW	1350.35
		FALSE	High		Sequest HT (Y2)	Unambiguous	[R].WLLEGELYNGR.[LV]		4	4	pcri_g8720.t1; pcri_g8718.t1; pcri_g8045.t1; pcri_g8716.t1	pcri_g8720.t1; pcri_g8718.t1; pcri_g8045.t1; pcri_g8716.t1	0	2	MS2	0.5344		0	200	1	47.3823	1	20171101_blank05.RAW	1350.63
		FALSE	High		Sequest HT (AL2)	Unambiguous	[R].WLLEGELYNGR.[LV]		4	4	pcri_g8720.t1; pcri_g8718.t1; pcri_g8045.t1; pcri_g8716.t1	pcri_g8720.t1; pcri_g8718.t1; pcri_g8045.t1; pcri_g8716.t1	0	2	MS2	0.5428		0	200	1	50.0598	1	20171101_02.RAW	1350.49
		FALSE	High		Sequest HT (Y2)	Unambiguous	[R].WLLEGELYNGR.[LV]		4	4	pcri_g8720.t1; pcri_g8718.t1; pcri_g8045.t1; pcri_g8716.t1	pcri_g8720.t1; pcri_g8718.t1; pcri_g8045.t1; pcri_g8716.t1	0	2	MS2	0.5083		0	200	1	48.5916	1	20171101_blank05.RAW	1350.82
		FALSE	High		Sequest HT (AL2)	Unambiguous	[R].WLLEGELYNGR.[LV]		4	4	pcri_g8720.t1; pcri_g8718.t1; pcri_g8045.t1; pcri_g8716.t1	pcri_g8720.t1; pcri_g8718.t1; pcri_g8045.t1; pcri_g8716.t1	0	2	MS2	0.2591		0	200	1	34.1329	1	20171101_02.RAW	1353.53
		FALSE	High		Sequest HT (P2)	Unambiguous	[R].WLLEGELYNGR.[LV]		4	4	pcri_g8720.t1; pcri_g8718.t1; pcri_g8045.t1; pcri_g8716.t1	pcri_g8720.t1; pcri_g8718.t1; pcri_g8045.t1; pcri_g8716.t1	0	2	MS2	0.3654		0	200	1	53.2628	1	20171202_05.RAW	1350.62
		FALSE	High		Sequest HT (Y2)	Unambiguous	[R].WLLEGELYNGR.[LV]		4	4	pcri_g8720.t1; pcri_g8718.t1; pcri_g8045.t1; pcri_g8716.t1	pcri_g8720.t1; pcri_g8718.t1; pcri_g8045.t1; pcri_g8716.t1	0	2	MS2	0.5724		0	200	1	50.5789	1	20171101_blank05.RAW	1350.26
		FALSE	High		Sequest HT (Q2)	Unambiguous	[R].WLLEGELYNGR.[LV]		4	4	pcri_g8720.t1; pcri_g8718.t1; pcri_g8045.t1; pcri_g8716.t1	pcri_g8720.t1; pcri_g8718.t1; pcri_g8045.t1; pcri_g8716.t1	0	1	MS2	0.4358		0	197.826	1	32.2713	1	20171202_04.RAW	1350.78
		FALSE	High		Sequest HT (AK2)	Unambiguous	[R].WLLEGELYNGR.[LV]		4	4	pcri_g8720.t1; pcri_g8718.t1; pcri_g8045.t1; pcri_g8716.t1	pcri_g8720.t1; pcri_g8718.t1; pcri_g8045.t1; pcri_g8716.t1	0	2	MS2	0.4628		0	200	1	49.6388	1	20171101_03.RAW	1350.8
		FALSE	High		Sequest HT (AF2)	Unambiguous	[R].WLLEGELYNGR.[LV]		4	4	pcri_g8720.t1; pcri_g8718.t1; pcri_g8045.t1; pcri_g8716.t1	pcri_g8720.t1; pcri_g8718.t1; pcri_g8045.t1; pcri_g8716.t1	0	2	MS2	0.522		0	200	1	44.4962	1	20171101_08.RAW	1351.07
		FALSE	High		Sequest HT (Y2)	Unambiguous	[R].WLLEGELYNGR.[LV]		4	4	pcri_g8720.t1; pcri_g8718.t1; pcri_g8045.t1; pcri_g8716.t1	pcri_g8720.t1; pcri_g8718.t1; pcri_g8045.t1; pcri_g8716.t1	0	2	MS2	0.5612		0	200	1	42.053	1	20171101_blank05.RAW	1350.23
		FALSE	High		Sequest HT (P2)	Unambiguous	[R].WLLEGELYNGR.[LV]		4	4	pcri_g8720.t1; pcri_g8718.t1; pcri_g8045.t1; pcri_g8716.t1	pcri_g8720.t1; pcri_g8718.t1; pcri_g8045.t1; pcri_g8716.t1	0	2	MS2	0.4642		0	200	1	52.328	1	20171202_05.RAW	1349.67
		FALSE	High		Sequest HT (P2)	Unambiguous	[R].WLLEGELYNGR.[LV]		4	4	pcri_g8720.t1; pcri_g8718.t1; pcri_g8045.t1; pcri_g8716.t1	pcri_g8720.t1; pcri_g8718.t1; pcri_g8045.t1; pcri_g8716.t1	0	2	MS2	0.476		0	200	1	60.6425	1	20171202_05.RAW	1350.01
		FALSE	High		Sequest HT (AF2)	Unambiguous	[R].WLLEGELYNGR.[LV]		4	4	pcri_g8720.t1; pcri_g8718.t1; pcri_g8045.t1; pcri_g8716.t1	pcri_g8720.t1; pcri_g8718.t1; pcri_g8045.t1; pcri_g8716.t1	0	2	MS2	0.3655		0	200	1	53.8794	1	20171101_08.RAW	1351.77
		FALSE	High		Sequest HT (Y2)	Unambiguous	[R].WLLEGELYNGR.[LV]		4	4	pcri_g8720.t1; pcri_g8718.t1; pcri_g8045.t1; pcri_g8716.t1	pcri_g8720.t1; pcri_g8718.t1; pcri_g8045.t1; pcri_g8716.t1	0	2	MS2	0.4637		0	200	1	49.9783	1	20171101_blank05.RAW	1350.71
		FALSE	High		Sequest HT (AF2)	Unambiguous	[R].WLLEGELYNGR.[LV]		4	4	pcri_g8720.t1; pcri_g8718.t1; pcri_g8045.t1; pcri_g8716.t1	pcri_g8720.t1; pcri_g8718.t1; pcri_g8045.t1; pcri_g8716.t1	0	2	MS2	0.4301		0	200	1	49.9231	1	20171101_08.RAW	1350.58
		FALSE	High		Sequest HT (AF2)	Unambiguous	[R].WLLEGELYNGR.[LV]		4	4	pcri_g8720.t1; pcri_g8718.t1; pcri_g8045.t1; pcri_g8716.t1	pcri_g8720.t1; pcri_g8718.t1; pcri_g8045.t1; pcri_g8716.t1	0	2	MS2	0.3776		0	200	1	36.9338	1	20171101_08.RAW	1350.92
		FALSE	High		Sequest HT (V2)	Unambiguous	[R].WLLEGELYNGR.[LV]		4	4	pcri_g8720.t1; pcri_g8718.t1; pcri_g8045.t1; pcri_g8716.t1	pcri_g8720.t1; pcri_g8718.t1; pcri_g8045.t1; pcri_g8716.t1	0	2	MS2	0.4947		0	200	1	55.3139	1	20171101_blank08.RAW	1350.57
		FALSE	High		Sequest HT (K2)	Unambiguous	[R].WLLEGELYNGR.[LV]		4	4	pcri_g8720.t1; pcri_g8718.t1; pcri_g8045.t1; pcri_g8716.t1	pcri_g8720.t1; pcri_g8718.t1; pcri_g8045.t1; pcri_g8716.t1	0	1	MS2	0.4498		0	200	1	32.3667	1	20171202_10.RAW	1350.76
		FALSE	High		Sequest HT (V2)	Unambiguous	[R].WLLEGELYNGR.[LV]		4	4	pcri_g8720.t1; pcri_g8718.t1; pcri_g8045.t1; pcri_g8716.t1	pcri_g8720.t1; pcri_g8718.t1; pcri_g8045.t1; pcri_g8716.t1	0	2	MS2	0.4275		0	200	1	52.7753	1	20171101_blank08.RAW	1350.2
		FALSE	High		Sequest HT (Z2)	Unambiguous	[R].WLLEGELYNGR.[LV]		4	4	pcri_g8720.t1; pcri_g8718.t1; pcri_g8045.t1; pcri_g8716.t1	pcri_g8720.t1; pcri_g8718.t1; pcri_g8045.t1; pcri_g8716.t1	0	2	MS2	0.4627		0	200	1	34.5668	1	20171101_blank04.RAW	1350.7
		FALSE	High		Sequest HT (AJ2)	Unambiguous	[R].WLLEGELYNGR.[LV]		4	4	pcri_g8720.t1; pcri_g8718.t1; pcri_g8045.t1; pcri_g8716.t1	pcri_g8720.t1; pcri_g8718.t1; pcri_g8045.t1; pcri_g8716.t1	0	1	MS2	0.38		0	200	1	34.284	1	20171101_04.RAW	1350.87
		FALSE	High		Sequest HT (V2)	Unambiguous	[R].WLLEGELYNGR.[LV]		4	4	pcri_g8720.t1; pcri_g8718.t1; pcri_g8045.t1; pcri_g8716.t1	pcri_g8720.t1; pcri_g8718.t1; pcri_g8045.t1; pcri_g8716.t1	0	2	MS2	0.3976		0	200	1	48.8721	1	20171101_blank08.RAW	1349.95
		FALSE	High		Sequest HT (AA2)	Unambiguous	[R].WLLEGELYNGR.[LV]		4	4	pcri_g8720.t1; pcri_g8718.t1; pcri_g8045.t1; pcri_g8716.t1	pcri_g8720.t1; pcri_g8718.t1; pcri_g8045.t1; pcri_g8716.t1	0	2	MS2	0.4573		0	200	1	55.4043	1	20171101_blank03.RAW	1349.8
		FALSE	High		Sequest HT (AF2)	Unambiguous	[R].WLLEGELYNGR.[LV]		4	4	pcri_g8720.t1; pcri_g8718.t1; pcri_g8045.t1; pcri_g8716.t1	pcri_g8720.t1; pcri_g8718.t1; pcri_g8045.t1; pcri_g8716.t1	0	1	MS2	0.2547		0	200	1	34.5662	1	20171101_08.RAW	1350.75
	FALSE	High	[R].LENFRETGEAGHFGAAR.[F]				1	1	15	pcri_g8720.t1	pcri_g8720.t1	pcri_g8720.t1 [118-134]	1	1861.89	Not Found	Not Found	Not Found	High	Not Found	Not Found	Not Found	High	High	Not Found	Not Found	Not Found	Not Found	High	Not Found	Not Found	Not Found	High	High	Not Found	Not Found	High	4.78	R.LENFRETGEAGHFGAAR.F	[118-134]
		Checked	Confidence		Identifying Node	PSM Ambiguity	Annotated Sequence	Modifications	# Protein Groups	# Proteins	Master Protein Accessions	Protein Accessions	# Missed Cleavages	Charge	MS Order	DeltaScore	Isolation Interference [%]	DeltaCn	Ion Inject Time [ms]	Rank	RT [min]	Search Engine Rank	Spectrum File	MH+ [Da]
		FALSE	High		Sequest HT (P2)	Unambiguous	[R].LENFRETGEAGHFGAAR.[F]		1	1	pcri_g8720.t1	pcri_g8720.t1	1	3	MS2	0.2824		0	200	1	20.5452	1	20171202_05.RAW	1863.69
		FALSE	High		Sequest HT (AJ2)	Unambiguous	[R].LENFRETGEAGHFGAAR.[F]		1	1	pcri_g8720.t1	pcri_g8720.t1	1	3	MS2	0.2577		0	200	1	24.4029	1	20171101_04.RAW	1863.91
		FALSE	High		Sequest HT (K2)	Unambiguous	[R].LENFRETGEAGHFGAAR.[F]		1	1	pcri_g8720.t1	pcri_g8720.t1	1	3	MS2	0.2472		0	200	1	20.8773	1	20171202_10.RAW	1863.37
		FALSE	High		Sequest HT (Q2)	Unambiguous	[R].LENFRETGEAGHFGAAR.[F]		1	1	pcri_g8720.t1	pcri_g8720.t1	1	3	MS2	0.245		0	200	1	20.4703	1	20171202_04.RAW	1863.04
		FALSE	High		Sequest HT (AD2)	Unambiguous	[R].LENFRETGEAGHFGAAR.[F]		1	1	pcri_g8720.t1	pcri_g8720.t1	1	3	MS2	0.263		0	200	1	24.4453	1	20171101_10.RAW	1864.03
		FALSE	High		Sequest HT (AI2)	Unambiguous	[R].LENFRETGEAGHFGAAR.[F]		1	1	pcri_g8720.t1	pcri_g8720.t1	1	3	MS2	0.2966		0	200	1	24.6237	1	20171101_05.RAW	1862.78
		FALSE	High		Sequest HT (K2)	Unambiguous	[R].LENFRETGEAGHFGAAR.[F]		1	1	pcri_g8720.t1	pcri_g8720.t1	1	3	MS2	0.2436		0	200	1	22.0861	1	20171202_10.RAW	1862.52
		FALSE	High		Sequest HT (S2)	Unambiguous	[R].LENFRETGEAGHFGAAR.[F]		1	1	pcri_g8720.t1	pcri_g8720.t1	1	3	MS2	0.2732		0	200	1	21.5755	1	20171202_02.RAW	1863.03
		FALSE	High		Sequest HT (AL2)	Unambiguous	[R].LENFRETGEAGHFGAAR.[F]		1	1	pcri_g8720.t1	pcri_g8720.t1	1	3	MS2	0.2857		0	200	1	24.427	1	20171101_02.RAW	1862.69
		FALSE	High		Sequest HT (E2)	Unambiguous	[R].LENFRETGEAGHFGAAR.[F]		1	1	pcri_g8720.t1	pcri_g8720.t1	1	3	MS2	0.1884		0	200	1	21.1548	1	20171202_blank06.RAW	1863.37
		FALSE	High		Sequest HT (AL2)	Unambiguous	[R].LENFRETGEAGHFGAAR.[F]		1	1	pcri_g8720.t1	pcri_g8720.t1	1	2	MS2	0.3146		0	200	1	24.4693	1	20171101_02.RAW	1862.32
		FALSE	High		Sequest HT (S2)	Unambiguous	[R].LENFRETGEAGHFGAAR.[F]		1	1	pcri_g8720.t1	pcri_g8720.t1	1	2	MS2	0.3041		0	200	1	20.167	1	20171202_02.RAW	1862.14
		FALSE	High		Sequest HT (S2)	Unambiguous	[R].LENFRETGEAGHFGAAR.[F]		1	1	pcri_g8720.t1	pcri_g8720.t1	1	3	MS2	0.288		0	200	1	20.0481	1	20171202_02.RAW	1862.89
		FALSE	High		Sequest HT (Y2)	Unambiguous	[R].LENFRETGEAGHFGAAR.[F]		1	1	pcri_g8720.t1	pcri_g8720.t1	1	3	MS2	0.2659		0	200	1	24.6897	1	20171101_blank05.RAW	1863.41
		FALSE	High		Sequest HT (X2)	Unambiguous	[R].LENFRETGEAGHFGAAR.[F]		1	1	pcri_g8720.t1	pcri_g8720.t1	1	3	MS2	0.3089		0	200	1	25.126	1	20171101_blank06.RAW	1863.16
	FALSE	High	[R].ETGEAGHFGAAR.[F]				1	1	5	pcri_g8720.t1	pcri_g8720.t1	pcri_g8720.t1 [123-134]	0	1202.55	Not Found	Not Found	Not Found	High	Not Found	Not Found	Not Found	Not Found	Not Found	Not Found	Not Found	Not Found	Not Found	High	Not Found	Not Found	Not Found	Not Found	Not Found	Not Found	Not Found	High	3.51	R.ETGEAGHFGAAR.F	[123-134]
		Checked	Confidence		Identifying Node	PSM Ambiguity	Annotated Sequence	Modifications	# Protein Groups	# Proteins	Master Protein Accessions	Protein Accessions	# Missed Cleavages	Charge	MS Order	DeltaScore	Isolation Interference [%]	DeltaCn	Ion Inject Time [ms]	Rank	RT [min]	Search Engine Rank	Spectrum File	MH+ [Da]
		FALSE	High		Sequest HT (S2)	Selected	[R].ETGEAGHFGAAR.[F]		1	1	pcri_g8720.t1	pcri_g8720.t1	0	2	MS2			0.0223	200	2	19.3474	2	20171202_02.RAW	1202.87
		FALSE	High		Sequest HT (AL2)	Unambiguous	[R].ETGEAGHFGAAR.[F]		1	1	pcri_g8720.t1	pcri_g8720.t1	0	2	MS2	0.1875		0	200	1	57.083	1	20171101_02.RAW	1203.01
		FALSE	High		Sequest HT (AL2)	Unambiguous	[R].ETGEAGHFGAAR.[F]		1	1	pcri_g8720.t1	pcri_g8720.t1	0	2	MS2	0.148		0	200	1	23.2266	1	20171101_02.RAW	1203.13
		FALSE	High		Sequest HT (S2)	Unambiguous	[R].ETGEAGHFGAAR.[F]		1	1	pcri_g8720.t1	pcri_g8720.t1	0	1	MS2	0.3362		0	200	1	14.1718	1	20171202_02.RAW	1202.56
		FALSE	High		Sequest HT (AL2)	Unambiguous	[R].ETGEAGHFGAAR.[F]		1	1	pcri_g8720.t1	pcri_g8720.t1	0	1	MS2	0.2644		0	200	1	18.5865	1	20171101_02.RAW	1202.47
	FALSE	High	[K].DHLASPFEANIFTYGDR.[G]				3	3	68	pcri_g8720.t1; pcri_g8718.t1; pcri_g8716.t1	pcri_g8720.t1 pcri_g8718.t1 pcri_g8716.t1	pcri_g8720.t1 [186-202]; pcri_g8718.t1 [250-266]; pcri_g8716.t1 [250-266]	0	1952.91	Not Found	High	Not Found	High	High	High	Not Found	High	High	High	Not Found	High	Not Found	High	Not Found	High	Not Found	High	High	Not Found	High	High	5.64	K.DHLASPFEANIFTYGDR.G	[186-202]
		Checked	Confidence		Identifying Node	PSM Ambiguity	Annotated Sequence	Modifications	# Protein Groups	# Proteins	Master Protein Accessions	Protein Accessions	# Missed Cleavages	Charge	MS Order	DeltaScore	Isolation Interference [%]	DeltaCn	Ion Inject Time [ms]	Rank	RT [min]	Search Engine Rank	Spectrum File	MH+ [Da]
		FALSE	High		Sequest HT (R2)	Unambiguous	[K].DHLASPFEANIFTYGDR.[G]		3	3	pcri_g8720.t1; pcri_g8718.t1; pcri_g8716.t1	pcri_g8720.t1; pcri_g8718.t1; pcri_g8716.t1	0	2	MS2	0.6968		0	200	1	32.6426	1	20171202_03.RAW	1953.97
		FALSE	High		Sequest HT (T2)	Unambiguous	[K].DHLASPFEANIFTYGDR.[G]		3	3	pcri_g8720.t1; pcri_g8718.t1; pcri_g8716.t1	pcri_g8720.t1; pcri_g8718.t1; pcri_g8716.t1	0	2	MS2	0.6961		0	200	1	32.9518	1	20171202_01.RAW	1954.36
		FALSE	High		Sequest HT (AJ2)	Unambiguous	[K].DHLASPFEANIFTYGDR.[G]		3	3	pcri_g8720.t1; pcri_g8718.t1; pcri_g8716.t1	pcri_g8720.t1; pcri_g8718.t1; pcri_g8716.t1	0	2	MS2	0.6979		0	169.577	1	34.424	1	20171101_04.RAW	1953.58
		FALSE	High		Sequest HT (Q2)	Unambiguous	[K].DHLASPFEANIFTYGDR.[G]		3	3	pcri_g8720.t1; pcri_g8718.t1; pcri_g8716.t1	pcri_g8720.t1; pcri_g8718.t1; pcri_g8716.t1	0	2	MS2	0.6629		0	200	1	33.398	1	20171202_04.RAW	1953.52
		FALSE	High		Sequest HT (AM2)	Unambiguous	[K].DHLASPFEANIFTYGDR.[G]		3	3	pcri_g8720.t1; pcri_g8718.t1; pcri_g8716.t1	pcri_g8720.t1; pcri_g8718.t1; pcri_g8716.t1	0	2	MS2	0.6881		0	200	1	34.8737	1	20171101_01.RAW	1954.42
		FALSE	High		Sequest HT (AJ2)	Unambiguous	[K].DHLASPFEANIFTYGDR.[G]		3	3	pcri_g8720.t1; pcri_g8718.t1; pcri_g8716.t1	pcri_g8720.t1; pcri_g8718.t1; pcri_g8716.t1	0	2	MS2	0.7086		0	200	1	58.9302	1	20171101_04.RAW	1954.55
		FALSE	High		Sequest HT (Q2)	Unambiguous	[K].DHLASPFEANIFTYGDR.[G]		3	3	pcri_g8720.t1; pcri_g8718.t1; pcri_g8716.t1	pcri_g8720.t1; pcri_g8718.t1; pcri_g8716.t1	0	2	MS2	0.739		0	200	1	35.5073	1	20171202_04.RAW	1954.3
		FALSE	High		Sequest HT (Q2)	Unambiguous	[K].DHLASPFEANIFTYGDR.[G]		3	3	pcri_g8720.t1; pcri_g8718.t1; pcri_g8716.t1	pcri_g8720.t1; pcri_g8718.t1; pcri_g8716.t1	0	2	MS2	0.7162		0	200	1	32.8568	1	20171202_04.RAW	1953.49
		FALSE	High		Sequest HT (S2)	Unambiguous	[K].DHLASPFEANIFTYGDR.[G]		3	3	pcri_g8720.t1; pcri_g8718.t1; pcri_g8716.t1	pcri_g8720.t1; pcri_g8718.t1; pcri_g8716.t1	0	2	MS2	0.7297		0	200	1	32.6648	1	20171202_02.RAW	1953.81
		FALSE	High		Sequest HT (Q2)	Unambiguous	[K].DHLASPFEANIFTYGDR.[G]		3	3	pcri_g8720.t1; pcri_g8718.t1; pcri_g8716.t1	pcri_g8720.t1; pcri_g8718.t1; pcri_g8716.t1	0	2	MS2	0.6471		0	133.811	1	32.9828	1	20171202_04.RAW	1956.63
		FALSE	High		Sequest HT (AL2)	Unambiguous	[K].DHLASPFEANIFTYGDR.[G]		3	3	pcri_g8720.t1; pcri_g8718.t1; pcri_g8716.t1	pcri_g8720.t1; pcri_g8718.t1; pcri_g8716.t1	0	2	MS2	0.6798		0	200	1	34.2406	1	20171101_02.RAW	1954.67
		FALSE	High		Sequest HT (AK2)	Unambiguous	[K].DHLASPFEANIFTYGDR.[G]		3	3	pcri_g8720.t1; pcri_g8718.t1; pcri_g8716.t1	pcri_g8720.t1; pcri_g8718.t1; pcri_g8716.t1	0	2	MS2	0.7303		0	200	1	34.8469	1	20171101_03.RAW	1953.69
		FALSE	High		Sequest HT (S2)	Unambiguous	[K].DHLASPFEANIFTYGDR.[G]		3	3	pcri_g8720.t1; pcri_g8718.t1; pcri_g8716.t1	pcri_g8720.t1; pcri_g8718.t1; pcri_g8716.t1	0	2	MS2	0.6473		0	200	1	33.2159	1	20171202_02.RAW	1953.82
		FALSE	High		Sequest HT (Q2)	Unambiguous	[K].DHLASPFEANIFTYGDR.[G]		3	3	pcri_g8720.t1; pcri_g8718.t1; pcri_g8716.t1	pcri_g8720.t1; pcri_g8718.t1; pcri_g8716.t1	0	2	MS2	0.7247		0	200	1	33.9742	1	20171202_04.RAW	1953.77
		FALSE	High		Sequest HT (S2)	Unambiguous	[K].DHLASPFEANIFTYGDR.[G]		3	3	pcri_g8720.t1; pcri_g8718.t1; pcri_g8716.t1	pcri_g8720.t1; pcri_g8718.t1; pcri_g8716.t1	0	2	MS2	0.7137		0	200	1	33.7786	1	20171202_02.RAW	1954.5
		FALSE	High		Sequest HT (P2)	Unambiguous	[K].DHLASPFEANIFTYGDR.[G]		3	3	pcri_g8720.t1; pcri_g8718.t1; pcri_g8716.t1	pcri_g8720.t1; pcri_g8718.t1; pcri_g8716.t1	0	2	MS2	0.7239		0	200	1	32.9008	1	20171202_05.RAW	1953.8
		FALSE	High		Sequest HT (P2)	Unambiguous	[K].DHLASPFEANIFTYGDR.[G]		3	3	pcri_g8720.t1; pcri_g8718.t1; pcri_g8716.t1	pcri_g8720.t1; pcri_g8718.t1; pcri_g8716.t1	0	2	MS2	0.7377		0	200	1	34.0746	1	20171202_05.RAW	1953.2
		FALSE	High		Sequest HT (AI2)	Unambiguous	[K].DHLASPFEANIFTYGDR.[G]		3	3	pcri_g8720.t1; pcri_g8718.t1; pcri_g8716.t1	pcri_g8720.t1; pcri_g8718.t1; pcri_g8716.t1	0	2	MS2	0.6879		0	200	1	34.9659	1	20171101_05.RAW	1953.28
		FALSE	High		Sequest HT (Y2)	Unambiguous	[K].DHLASPFEANIFTYGDR.[G]		3	3	pcri_g8720.t1; pcri_g8718.t1; pcri_g8716.t1	pcri_g8720.t1; pcri_g8718.t1; pcri_g8716.t1	0	2	MS2	0.7273		0	200	1	34.5686	1	20171101_blank05.RAW	1953.62
		FALSE	High		Sequest HT (AJ2)	Unambiguous	[K].DHLASPFEANIFTYGDR.[G]		3	3	pcri_g8720.t1; pcri_g8718.t1; pcri_g8716.t1	pcri_g8720.t1; pcri_g8718.t1; pcri_g8716.t1	0	2	MS2	0.7069		0	200	1	57.6006	1	20171101_04.RAW	1954.65
		FALSE	High		Sequest HT (AJ2)	Unambiguous	[K].DHLASPFEANIFTYGDR.[G]		3	3	pcri_g8720.t1; pcri_g8718.t1; pcri_g8716.t1	pcri_g8720.t1; pcri_g8718.t1; pcri_g8716.t1	0	2	MS2	0.652		0	200	1	34.9807	1	20171101_04.RAW	1953.42
		FALSE	High		Sequest HT (AJ2)	Unambiguous	[K].DHLASPFEANIFTYGDR.[G]		3	3	pcri_g8720.t1; pcri_g8718.t1; pcri_g8716.t1	pcri_g8720.t1; pcri_g8718.t1; pcri_g8716.t1	0	2	MS2	0.6681		0	200	1	37.7082	1	20171101_04.RAW	1954.13
		FALSE	High		Sequest HT (AI2)	Unambiguous	[K].DHLASPFEANIFTYGDR.[G]		3	3	pcri_g8720.t1; pcri_g8718.t1; pcri_g8716.t1	pcri_g8720.t1; pcri_g8718.t1; pcri_g8716.t1	0	2	MS2	0.7232		0	200	1	34.3973	1	20171101_05.RAW	1953.23
		FALSE	High		Sequest HT (AI2)	Unambiguous	[K].DHLASPFEANIFTYGDR.[G]		3	3	pcri_g8720.t1; pcri_g8718.t1; pcri_g8716.t1	pcri_g8720.t1; pcri_g8718.t1; pcri_g8716.t1	0	2	MS2	0.6565		0	200	1	35.7952	1	20171101_05.RAW	1953.67
		FALSE	High		Sequest HT (P2)	Unambiguous	[K].DHLASPFEANIFTYGDR.[G]		3	3	pcri_g8720.t1; pcri_g8718.t1; pcri_g8716.t1	pcri_g8720.t1; pcri_g8718.t1; pcri_g8716.t1	0	2	MS2	0.6848		0	200	1	33.4651	1	20171202_05.RAW	1952.92
		FALSE	High		Sequest HT (AJ2)	Unambiguous	[K].DHLASPFEANIFTYGDR.[G]		3	3	pcri_g8720.t1; pcri_g8718.t1; pcri_g8716.t1	pcri_g8720.t1; pcri_g8718.t1; pcri_g8716.t1	0	2	MS2	0.671		0	200	1	35.672	1	20171101_04.RAW	1953.72
		FALSE	High		Sequest HT (S2)	Unambiguous	[K].DHLASPFEANIFTYGDR.[G]		3	3	pcri_g8720.t1; pcri_g8718.t1; pcri_g8716.t1	pcri_g8720.t1; pcri_g8718.t1; pcri_g8716.t1	0	3	MS2	0.4845		0	200	1	33.7038	1	20171202_02.RAW	1955.09
		FALSE	High		Sequest HT (AJ2)	Unambiguous	[K].DHLASPFEANIFTYGDR.[G]		3	3	pcri_g8720.t1; pcri_g8718.t1; pcri_g8716.t1	pcri_g8720.t1; pcri_g8718.t1; pcri_g8716.t1	0	2	MS2	0.677		0	200	1	58.158	1	20171101_04.RAW	1954.07
		FALSE	High		Sequest HT (X2)	Unambiguous	[K].DHLASPFEANIFTYGDR.[G]		3	3	pcri_g8720.t1; pcri_g8718.t1; pcri_g8716.t1	pcri_g8720.t1; pcri_g8718.t1; pcri_g8716.t1	0	2	MS2	0.6374		0	200	1	34.7926	1	20171101_blank06.RAW	1954.64
		FALSE	High		Sequest HT (AH2)	Unambiguous	[K].DHLASPFEANIFTYGDR.[G]		3	3	pcri_g8720.t1; pcri_g8718.t1; pcri_g8716.t1	pcri_g8720.t1; pcri_g8718.t1; pcri_g8716.t1	0	2	MS2	0.6755		0	200	1	34.8177	1	20171101_06.RAW	1954.77
		FALSE	High		Sequest HT (AJ2)	Unambiguous	[K].DHLASPFEANIFTYGDR.[G]		3	3	pcri_g8720.t1; pcri_g8718.t1; pcri_g8716.t1	pcri_g8720.t1; pcri_g8718.t1; pcri_g8716.t1	0	2	MS2	0.6901		0	200	1	47.374	1	20171101_04.RAW	1953.41
		FALSE	High		Sequest HT (AI2)	Unambiguous	[K].DHLASPFEANIFTYGDR.[G]		3	3	pcri_g8720.t1; pcri_g8718.t1; pcri_g8716.t1	pcri_g8720.t1; pcri_g8718.t1; pcri_g8716.t1	0	3	MS2	0.567		0	200	1	35.4622	1	20171101_05.RAW	1954.45
		FALSE	High		Sequest HT (AJ2)	Unambiguous	[K].DHLASPFEANIFTYGDR.[G]		3	3	pcri_g8720.t1; pcri_g8718.t1; pcri_g8716.t1	pcri_g8720.t1; pcri_g8718.t1; pcri_g8716.t1	0	3	MS2	0.5567		0	200	1	47.5132	1	20171101_04.RAW	1954.96
		FALSE	High		Sequest HT (X2)	Unambiguous	[K].DHLASPFEANIFTYGDR.[G]		3	3	pcri_g8720.t1; pcri_g8718.t1; pcri_g8716.t1	pcri_g8720.t1; pcri_g8718.t1; pcri_g8716.t1	0	3	MS2	0.4668		0	200	1	35.2863	1	20171101_blank06.RAW	1955.33
		FALSE	High		Sequest HT (AJ2)	Unambiguous	[K].DHLASPFEANIFTYGDR.[G]		3	3	pcri_g8720.t1; pcri_g8718.t1; pcri_g8716.t1	pcri_g8720.t1; pcri_g8718.t1; pcri_g8716.t1	0	3	MS2	0.5332		0	200	1	55.9111	1	20171101_04.RAW	1955.02
		FALSE	High		Sequest HT (Q2)	Unambiguous	[K].DHLASPFEANIFTYGDR.[G]		3	3	pcri_g8720.t1; pcri_g8718.t1; pcri_g8716.t1	pcri_g8720.t1; pcri_g8718.t1; pcri_g8716.t1	0	2	MS2	0.6888		0	200	1	34.6993	1	20171202_04.RAW	1952.91
		FALSE	High		Sequest HT (AJ2)	Unambiguous	[K].DHLASPFEANIFTYGDR.[G]		3	3	pcri_g8720.t1; pcri_g8718.t1; pcri_g8716.t1	pcri_g8720.t1; pcri_g8718.t1; pcri_g8716.t1	0	3	MS2	0.3989		0	200	1	54.8029	1	20171101_04.RAW	1955.74
		FALSE	High		Sequest HT (AJ2)	Unambiguous	[K].DHLASPFEANIFTYGDR.[G]		3	3	pcri_g8720.t1; pcri_g8718.t1; pcri_g8716.t1	pcri_g8720.t1; pcri_g8718.t1; pcri_g8716.t1	0	2	MS2	0.6515		0	200	1	44.9237	1	20171101_04.RAW	1955.21
		FALSE	High		Sequest HT (P2)	Unambiguous	[K].DHLASPFEANIFTYGDR.[G]		3	3	pcri_g8720.t1; pcri_g8718.t1; pcri_g8716.t1	pcri_g8720.t1; pcri_g8718.t1; pcri_g8716.t1	0	3	MS2	0.5447		0	200	1	33.4114	1	20171202_05.RAW	1954.29
		FALSE	High		Sequest HT (AJ2)	Unambiguous	[K].DHLASPFEANIFTYGDR.[G]		3	3	pcri_g8720.t1; pcri_g8718.t1; pcri_g8716.t1	pcri_g8720.t1; pcri_g8718.t1; pcri_g8716.t1	0	3	MS2	0.5		0	200	1	45.8864	1	20171101_04.RAW	1953.71
		FALSE	High		Sequest HT (AJ2)	Unambiguous	[K].DHLASPFEANIFTYGDR.[G]		3	3	pcri_g8720.t1; pcri_g8718.t1; pcri_g8716.t1	pcri_g8720.t1; pcri_g8718.t1; pcri_g8716.t1	0	2	MS2	0.6116		0	200	1	41.1789	1	20171101_04.RAW	1953.59
		FALSE	High		Sequest HT (S2)	Unambiguous	[K].DHLASPFEANIFTYGDR.[G]		3	3	pcri_g8720.t1; pcri_g8718.t1; pcri_g8716.t1	pcri_g8720.t1; pcri_g8718.t1; pcri_g8716.t1	0	3	MS2	0.4834		0	200	1	32.6002	1	20171202_02.RAW	1954.1
		FALSE	High		Sequest HT (D2)	Unambiguous	[K].DHLASPFEANIFTYGDR.[G]		3	3	pcri_g8720.t1; pcri_g8718.t1; pcri_g8716.t1	pcri_g8720.t1; pcri_g8718.t1; pcri_g8716.t1	0	3	MS2	0.454		0	200	1	32.9396	1	20171202_blank07.RAW	1954.19
		FALSE	High		Sequest HT (AI2)	Unambiguous	[K].DHLASPFEANIFTYGDR.[G]		3	3	pcri_g8720.t1; pcri_g8718.t1; pcri_g8716.t1	pcri_g8720.t1; pcri_g8718.t1; pcri_g8716.t1	0	3	MS2	0.4846		0	200	1	46.0175	1	20171101_05.RAW	1954.83
		FALSE	High		Sequest HT (Y2)	Unambiguous	[K].DHLASPFEANIFTYGDR.[G]		3	3	pcri_g8720.t1; pcri_g8718.t1; pcri_g8716.t1	pcri_g8720.t1; pcri_g8718.t1; pcri_g8716.t1	0	3	MS2	0.5043		0	200	1	35.4943	1	20171101_blank05.RAW	1954.04
		FALSE	High		Sequest HT (AJ2)	Unambiguous	[K].DHLASPFEANIFTYGDR.[G]		3	3	pcri_g8720.t1; pcri_g8718.t1; pcri_g8716.t1	pcri_g8720.t1; pcri_g8718.t1; pcri_g8716.t1	0	2	MS2	0.6361		0	200	1	43.7151	1	20171101_04.RAW	1954.07
		FALSE	High		Sequest HT (AJ2)	Unambiguous	[K].DHLASPFEANIFTYGDR.[G]		3	3	pcri_g8720.t1; pcri_g8718.t1; pcri_g8716.t1	pcri_g8720.t1; pcri_g8718.t1; pcri_g8716.t1	0	2	MS2	0.6562		0	200	1	50.549	1	20171101_04.RAW	1953.6
		FALSE	High		Sequest HT (AL2)	Unambiguous	[K].DHLASPFEANIFTYGDR.[G]		3	3	pcri_g8720.t1; pcri_g8718.t1; pcri_g8716.t1	pcri_g8720.t1; pcri_g8718.t1; pcri_g8716.t1	0	2	MS2	0.6232		0	200	1	43.3721	1	20171101_02.RAW	1955.59
		FALSE	High		Sequest HT (AA2)	Unambiguous	[K].DHLASPFEANIFTYGDR.[G]		3	3	pcri_g8720.t1; pcri_g8718.t1; pcri_g8716.t1	pcri_g8720.t1; pcri_g8718.t1; pcri_g8716.t1	0	3	MS2	0.4042		0	200	1	34.5173	1	20171101_blank03.RAW	1953.96
		FALSE	High		Sequest HT (AJ2)	Unambiguous	[K].DHLASPFEANIFTYGDR.[G]		3	3	pcri_g8720.t1; pcri_g8718.t1; pcri_g8716.t1	pcri_g8720.t1; pcri_g8718.t1; pcri_g8716.t1	0	2	MS2	0.6336		0	200	1	42.5966	1	20171101_04.RAW	1953.71
		FALSE	High		Sequest HT (AJ2)	Unambiguous	[K].DHLASPFEANIFTYGDR.[G]		3	3	pcri_g8720.t1; pcri_g8718.t1; pcri_g8716.t1	pcri_g8720.t1; pcri_g8718.t1; pcri_g8716.t1	0	2	MS2	0.4532		0	200	1	59.7196	1	20171101_04.RAW	1953.15
		FALSE	High		Sequest HT (S2)	Unambiguous	[K].DHLASPFEANIFTYGDR.[G]		3	3	pcri_g8720.t1; pcri_g8718.t1; pcri_g8716.t1	pcri_g8720.t1; pcri_g8718.t1; pcri_g8716.t1	0	3	MS2	0.5061		0	200	1	33.1513	1	20171202_02.RAW	1953.17
		FALSE	High		Sequest HT (AJ2)	Unambiguous	[K].DHLASPFEANIFTYGDR.[G]		3	3	pcri_g8720.t1; pcri_g8718.t1; pcri_g8716.t1	pcri_g8720.t1; pcri_g8718.t1; pcri_g8716.t1	0	2	MS2	0.6183		0	200	1	55.299	1	20171101_04.RAW	1953.14
		FALSE	High		Sequest HT (Y2)	Unambiguous	[K].DHLASPFEANIFTYGDR.[G]		3	3	pcri_g8720.t1; pcri_g8718.t1; pcri_g8716.t1	pcri_g8720.t1; pcri_g8718.t1; pcri_g8716.t1	0	3	MS2	0.4673		0	200	1	53.8324	1	20171101_blank05.RAW	1954.82
		FALSE	High		Sequest HT (Y2)	Unambiguous	[K].DHLASPFEANIFTYGDR.[G]		3	3	pcri_g8720.t1; pcri_g8718.t1; pcri_g8716.t1	pcri_g8720.t1; pcri_g8718.t1; pcri_g8716.t1	0	3	MS2	0.3036		0	200	1	46.0962	1	20171101_blank05.RAW	1954.02
		FALSE	High		Sequest HT (AH2)	Unambiguous	[K].DHLASPFEANIFTYGDR.[G]		3	3	pcri_g8720.t1; pcri_g8718.t1; pcri_g8716.t1	pcri_g8720.t1; pcri_g8718.t1; pcri_g8716.t1	0	3	MS2	0.3588		0	200	1	34.6472	1	20171101_06.RAW	1953.64
		FALSE	High		Sequest HT (E2)	Unambiguous	[K].DHLASPFEANIFTYGDR.[G]		3	3	pcri_g8720.t1; pcri_g8718.t1; pcri_g8716.t1	pcri_g8720.t1; pcri_g8718.t1; pcri_g8716.t1	0	3	MS2	0.4448		0	200	1	33.0414	1	20171202_blank06.RAW	1953.8
		FALSE	High		Sequest HT (Y2)	Unambiguous	[K].DHLASPFEANIFTYGDR.[G]		3	3	pcri_g8720.t1; pcri_g8718.t1; pcri_g8716.t1	pcri_g8720.t1; pcri_g8718.t1; pcri_g8716.t1	0	3	MS2	0.4426		0	200	1	49.0836	1	20171101_blank05.RAW	1954.14
		FALSE	High		Sequest HT (Y2)	Unambiguous	[K].DHLASPFEANIFTYGDR.[G]		3	3	pcri_g8720.t1; pcri_g8718.t1; pcri_g8716.t1	pcri_g8720.t1; pcri_g8718.t1; pcri_g8716.t1	0	3	MS2	0.5729		0	200	1	34.9442	1	20171101_blank05.RAW	1954.03
		FALSE	High		Sequest HT (Y2)	Unambiguous	[K].DHLASPFEANIFTYGDR.[G]		3	3	pcri_g8720.t1; pcri_g8718.t1; pcri_g8716.t1	pcri_g8720.t1; pcri_g8718.t1; pcri_g8716.t1	0	3	MS2	0.378		0	200	1	48.1782	1	20171101_blank05.RAW	1954.21
		FALSE	High		Sequest HT (Y2)	Unambiguous	[K].DHLASPFEANIFTYGDR.[G]		3	3	pcri_g8720.t1; pcri_g8718.t1; pcri_g8716.t1	pcri_g8720.t1; pcri_g8718.t1; pcri_g8716.t1	0	3	MS2	0.5439		0	200	1	43.7303	1	20171101_blank05.RAW	1954.34
		FALSE	High		Sequest HT (Y2)	Unambiguous	[K].DHLASPFEANIFTYGDR.[G]		3	3	pcri_g8720.t1; pcri_g8718.t1; pcri_g8716.t1	pcri_g8720.t1; pcri_g8718.t1; pcri_g8716.t1	0	3	MS2	0.3922		0	200	1	44.4783	1	20171101_blank05.RAW	1954.23
		FALSE	High		Sequest HT (W2)	Unambiguous	[K].DHLASPFEANIFTYGDR.[G]		3	3	pcri_g8720.t1; pcri_g8718.t1; pcri_g8716.t1	pcri_g8720.t1; pcri_g8718.t1; pcri_g8716.t1	0	3	MS2	0.5089		0	200	1	34.8296	1	20171101_blank07.RAW	1954.5
		FALSE	High		Sequest HT (Y2)	Unambiguous	[K].DHLASPFEANIFTYGDR.[G]		3	3	pcri_g8720.t1; pcri_g8718.t1; pcri_g8716.t1	pcri_g8720.t1; pcri_g8718.t1; pcri_g8716.t1	0	3	MS2	0.1496		0	200	1	47.5774	1	20171101_blank05.RAW	1956.4
		FALSE	High		Sequest HT (Y2)	Unambiguous	[K].DHLASPFEANIFTYGDR.[G]		3	3	pcri_g8720.t1; pcri_g8718.t1; pcri_g8716.t1	pcri_g8720.t1; pcri_g8718.t1; pcri_g8716.t1	0	3	MS2	0.4835		0	200	1	41.9331	1	20171101_blank05.RAW	1955.05
		FALSE	High		Sequest HT (X2)	Unambiguous	[K].DHLASPFEANIFTYGDR.[G]		3	3	pcri_g8720.t1; pcri_g8718.t1; pcri_g8716.t1	pcri_g8720.t1; pcri_g8718.t1; pcri_g8716.t1	0	3	MS2	0.4157		0	200	1	46.4968	1	20171101_blank06.RAW	1953.74
		FALSE	High		Sequest HT (X2)	Unambiguous	[K].DHLASPFEANIFTYGDR.[G]		3	3	pcri_g8720.t1; pcri_g8718.t1; pcri_g8716.t1	pcri_g8720.t1; pcri_g8718.t1; pcri_g8716.t1	0	3	MS2	0.4755		0	200	1	48.0293	1	20171101_blank06.RAW	1955.47
		FALSE	High		Sequest HT (AA2)	Unambiguous	[K].DHLASPFEANIFTYGDR.[G]		3	3	pcri_g8720.t1; pcri_g8718.t1; pcri_g8716.t1	pcri_g8720.t1; pcri_g8718.t1; pcri_g8716.t1	0	2	MS2	0.6		0	200	1	34.8073	1	20171101_blank03.RAW	1953.39
	FALSE	High	[R].FDPLDLTEANPLGTDYNR.[Q]				1	1	25	pcri_g8720.t1	pcri_g8720.t1	pcri_g8720.t1 [135-152]	0	2050.97	Not Found	High	High	High	High	Not Found	Not Found	High	Not Found	Not Found	Not Found	High	Not Found	High	Not Found	High	Not Found	High	Not Found	Not Found	Not Found	High	6.08	R.FDPLDLTEANPLGTDYNR.Q	[135-152]
		Checked	Confidence		Identifying Node	PSM Ambiguity	Annotated Sequence	Modifications	# Protein Groups	# Proteins	Master Protein Accessions	Protein Accessions	# Missed Cleavages	Charge	MS Order	DeltaScore	Isolation Interference [%]	DeltaCn	Ion Inject Time [ms]	Rank	RT [min]	Search Engine Rank	Spectrum File	MH+ [Da]
		FALSE	High		Sequest HT (AM2)	Unambiguous	[R].FDPLDLTEANPLGTDYNR.[Q]		1	1	pcri_g8720.t1	pcri_g8720.t1	0	2	MS2	0.6842		0	200	1	36.5397	1	20171101_01.RAW	2052.47
		FALSE	High		Sequest HT (Q2)	Unambiguous	[R].FDPLDLTEANPLGTDYNR.[Q]		1	1	pcri_g8720.t1	pcri_g8720.t1	0	2	MS2	0.6519		0	200	1	35.3653	1	20171202_04.RAW	2051.53
		FALSE	High		Sequest HT (T2)	Unambiguous	[R].FDPLDLTEANPLGTDYNR.[Q]		1	1	pcri_g8720.t1	pcri_g8720.t1	0	2	MS2	0.7022		0	200	1	35.0862	1	20171202_01.RAW	2052.57
		FALSE	High		Sequest HT (AL2)	Unambiguous	[R].FDPLDLTEANPLGTDYNR.[Q]		1	1	pcri_g8720.t1	pcri_g8720.t1	0	2	MS2	0.6808		0	200	1	36.4252	1	20171101_02.RAW	2051.57
		FALSE	High		Sequest HT (S2)	Unambiguous	[R].FDPLDLTEANPLGTDYNR.[Q]		1	1	pcri_g8720.t1	pcri_g8720.t1	0	2	MS2	0.5984		0	200	1	35.7705	1	20171202_02.RAW	2054.27
		FALSE	High		Sequest HT (T2)	Unambiguous	[R].FDPLDLTEANPLGTDYNR.[Q]		1	1	pcri_g8720.t1	pcri_g8720.t1	0	2	MS2	0.6766		0	200	1	35.6851	1	20171202_01.RAW	2052.2
		FALSE	High		Sequest HT (S2)	Unambiguous	[R].FDPLDLTEANPLGTDYNR.[Q]		1	1	pcri_g8720.t1	pcri_g8720.t1	0	2	MS2	0.7074		0	200	1	35.0234	1	20171202_02.RAW	2051.93
		FALSE	High		Sequest HT (S2)	Unambiguous	[R].FDPLDLTEANPLGTDYNR.[Q]		1	1	pcri_g8720.t1	pcri_g8720.t1	0	2	MS2	0.6917		0	200	1	35.5757	1	20171202_02.RAW	2050.98
		FALSE	High		Sequest HT (S2)	Unambiguous	[R].FDPLDLTEANPLGTDYNR.[Q]		1	1	pcri_g8720.t1	pcri_g8720.t1	0	2	MS2	0.6871		0	200	1	36.345	1	20171202_02.RAW	2051.49
		FALSE	High		Sequest HT (AJ2)	Unambiguous	[R].FDPLDLTEANPLGTDYNR.[Q]		1	1	pcri_g8720.t1	pcri_g8720.t1	0	2	MS2	0.6729		0	200	1	36.503	1	20171101_04.RAW	2051.75
		FALSE	High		Sequest HT (AB2)	Unambiguous	[R].FDPLDLTEANPLGTDYNR.[Q]		1	1	pcri_g8720.t1	pcri_g8720.t1	0	2	MS2	0.7084		0	200	1	36.5569	1	20171101_blank02.RAW	2051.8
		FALSE	High		Sequest HT (R2)	Unambiguous	[R].FDPLDLTEANPLGTDYNR.[Q]		1	1	pcri_g8720.t1	pcri_g8720.t1	0	2	MS2	0.6746		0	200	1	35.1302	1	20171202_03.RAW	2051.32
		FALSE	High		Sequest HT (S2)	Unambiguous	[R].FDPLDLTEANPLGTDYNR.[Q]		1	1	pcri_g8720.t1	pcri_g8720.t1	0	2	MS2	0.6275		0	200	1	39.7932	1	20171202_02.RAW	2053.57
		FALSE	High		Sequest HT (S2)	Unambiguous	[R].FDPLDLTEANPLGTDYNR.[Q]		1	1	pcri_g8720.t1	pcri_g8720.t1	0	2	MS2	0.6379		0	200	1	37.7761	1	20171202_02.RAW	2052.66
		FALSE	High		Sequest HT (AA2)	Unambiguous	[R].FDPLDLTEANPLGTDYNR.[Q]		1	1	pcri_g8720.t1	pcri_g8720.t1	0	2	MS2	0.6159		0	200	1	36.4451	1	20171101_blank03.RAW	2052.44
		FALSE	High		Sequest HT (S2)	Unambiguous	[R].FDPLDLTEANPLGTDYNR.[Q]		1	1	pcri_g8720.t1	pcri_g8720.t1	0	2	MS2	0.6274		0	200	1	41.3129	1	20171202_02.RAW	2053.09
		FALSE	High		Sequest HT (S2)	Unambiguous	[R].FDPLDLTEANPLGTDYNR.[Q]		1	1	pcri_g8720.t1	pcri_g8720.t1	0	2	MS2	0.6795		0	200	1	36.9195	1	20171202_02.RAW	2051.16
		FALSE	High		Sequest HT (S2)	Unambiguous	[R].FDPLDLTEANPLGTDYNR.[Q]		1	1	pcri_g8720.t1	pcri_g8720.t1	0	2	MS2	0.6607		0	200	1	40.7494	1	20171202_02.RAW	2052.11
		FALSE	High		Sequest HT (AL2)	Unambiguous	[R].FDPLDLTEANPLGTDYNR.[Q]		1	1	pcri_g8720.t1	pcri_g8720.t1	0	2	MS2	0.633		0	200	1	37.4236	1	20171101_02.RAW	2052.62
		FALSE	High		Sequest HT (S2)	Unambiguous	[R].FDPLDLTEANPLGTDYNR.[Q]		1	1	pcri_g8720.t1	pcri_g8720.t1	0	2	MS2	0.6247		0	200	1	38.459	1	20171202_02.RAW	2051.02
		FALSE	High		Sequest HT (AM2)	Unambiguous	[R].FDPLDLTEANPLGTDYNR.[Q]		1	1	pcri_g8720.t1	pcri_g8720.t1	0	2	MS2	0.5272		0	200	1	37.2714	1	20171101_01.RAW	2054.21
		FALSE	High		Sequest HT (AL2)	Unambiguous	[R].FDPLDLTEANPLGTDYNR.[Q]		1	1	pcri_g8720.t1	pcri_g8720.t1	0	2	MS2	0.5838		0	200	1	47.6186	1	20171101_02.RAW	2052.84
		FALSE	High		Sequest HT (S2)	Unambiguous	[R].FDPLDLTEANPLGTDYNR.[Q]		1	1	pcri_g8720.t1	pcri_g8720.t1	0	3	MS2	0.4331		0	200	1	35.3265	1	20171202_02.RAW	2056.46
		FALSE	High		Sequest HT (AL2)	Unambiguous	[R].FDPLDLTEANPLGTDYNR.[Q]		1	1	pcri_g8720.t1	pcri_g8720.t1	0	2	MS2	0.6786		0	200	1	38.5532	1	20171101_02.RAW	2052.55
		FALSE	High		Sequest HT (T2)	Unambiguous	[R].FDPLDLTEANPLGTDYNR.[Q]		1	1	pcri_g8720.t1	pcri_g8720.t1	0	2	MS2	0.6122		0	200	1	37.214	1	20171202_01.RAW	2052.38
	FALSE	High	[R].LAMLAVVGVLTVEAQGK.[G]				2	2	5	pcri_g8720.t1; pcri_g8045.t1	pcri_g8720.t1 pcri_g8045.t1	pcri_g8720.t1 [66-82]; pcri_g8045.t1 [125-141]	0	1698.98	Not Found	Not Found	Not Found	Not Found	Not Found	Not Found	Not Found	High	High	Not Found	Not Found	Not Found	Not Found	Not Found	Not Found	Not Found	Not Found	Not Found	High	Not Found	Not Found	High	3.77	R.LAMLAVVGVLTVEAQGK.G	[66-82]
		Checked	Confidence		Identifying Node	PSM Ambiguity	Annotated Sequence	Modifications	# Protein Groups	# Proteins	Master Protein Accessions	Protein Accessions	# Missed Cleavages	Charge	MS Order	DeltaScore	Isolation Interference [%]	DeltaCn	Ion Inject Time [ms]	Rank	RT [min]	Search Engine Rank	Spectrum File	MH+ [Da]
		FALSE	High		Sequest HT (AJ2)	Unambiguous	[R].LAMLAVVGVLTVEAQGK.[G]		2	2	pcri_g8720.t1; pcri_g8045.t1	pcri_g8720.t1; pcri_g8045.t1	0	3	MS2	0.4668		0	200	1	46.9382	1	20171101_04.RAW	1702.17
		FALSE	High		Sequest HT (U2)	Unambiguous	[R].LAMLAVVGVLTVEAQGK.[G]		2	2	pcri_g8720.t1; pcri_g8045.t1	pcri_g8720.t1; pcri_g8045.t1	0	3	MS2	0.2955		0	200	1	35.6564	1	20171101_blank09.RAW	1701.93
		FALSE	High		Sequest HT (X2)	Unambiguous	[R].LAMLAVVGVLTVEAQGK.[G]		2	2	pcri_g8720.t1; pcri_g8045.t1	pcri_g8720.t1; pcri_g8045.t1	0	3	MS2	0.2761		0	200	1	35.4825	1	20171101_blank06.RAW	1702.08
		FALSE	High		Sequest HT (Y2)	Unambiguous	[R].LAMLAVVGVLTVEAQGK.[G]		2	2	pcri_g8720.t1; pcri_g8045.t1	pcri_g8720.t1; pcri_g8045.t1	0	3	MS2	0.2928		0	200	1	35.1806	1	20171101_blank05.RAW	1702.18
		FALSE	High		Sequest HT (E2)	Unambiguous	[R].LAMLAVVGVLTVEAQGK.[G]		2	2	pcri_g8720.t1; pcri_g8045.t1	pcri_g8720.t1; pcri_g8045.t1	0	3	MS2	0.2765		0	200	1	33.7274	1	20171202_blank06.RAW	1701.91
	FALSE	High	[R].GTNVVAIFSAFAAVMHIAELAR.[EQ]				3	3	4	pcri_g8720.t1; pcri_g8718.t1; pcri_g8716.t1	pcri_g8720.t1 pcri_g8718.t1 pcri_g8716.t1	pcri_g8720.t1 [203-224]; pcri_g8718.t1 [267-288]; pcri_g8716.t1 [267-288]	0	2288.22	Not Found	Not Found	Not Found	Not Found	Not Found	Not Found	Not Found	High	Not Found	Not Found	Not Found	Not Found	Not Found	Not Found	Not Found	Not Found	Not Found	High	Not Found	Not Found	Not Found	High	4.98	R.GTNVVAIFSAFAAVMHIAELAR.E	[203-224]
		Checked	Confidence		Identifying Node	PSM Ambiguity	Annotated Sequence	Modifications	# Protein Groups	# Proteins	Master Protein Accessions	Protein Accessions	# Missed Cleavages	Charge	MS Order	DeltaScore	Isolation Interference [%]	DeltaCn	Ion Inject Time [ms]	Rank	RT [min]	Search Engine Rank	Spectrum File	MH+ [Da]
		FALSE	High		Sequest HT (Q2)	Unambiguous	[R].GTNVVAIFSAFAAVMHIAELAR.[EQ]		3	3	pcri_g8720.t1; pcri_g8718.t1; pcri_g8716.t1	pcri_g8720.t1; pcri_g8718.t1; pcri_g8716.t1	0	2	MS2	0.6827		0	200	1	48.8566	1	20171202_04.RAW	2289.57
		FALSE	High		Sequest HT (AJ2)	Unambiguous	[R].GTNVVAIFSAFAAVMHIAELAR.[EQ]		3	3	pcri_g8720.t1; pcri_g8718.t1; pcri_g8716.t1	pcri_g8720.t1; pcri_g8718.t1; pcri_g8716.t1	0	2	MS2	0.6652		0	200	1	47.5874	1	20171101_04.RAW	2289.78
		FALSE	High		Sequest HT (Q2)	Unambiguous	[R].GTNVVAIFSAFAAVMHIAELAR.[EQ]		3	3	pcri_g8720.t1; pcri_g8718.t1; pcri_g8716.t1	pcri_g8720.t1; pcri_g8718.t1; pcri_g8716.t1	0	3	MS2	0.6173		0	200	1	48.7376	1	20171202_04.RAW	2290.91
		FALSE	High		Sequest HT (Y2)	Unambiguous	[R].GTNVVAIFSAFAAVMHIAELAR.[EQ]		3	3	pcri_g8720.t1; pcri_g8718.t1; pcri_g8716.t1	pcri_g8720.t1; pcri_g8718.t1; pcri_g8716.t1	0	3	MS2	0.4333		0	200	1	48.015	1	20171101_blank05.RAW	2290.17
	FALSE	High	[K].GPIENAKDHLASPFEANIFTYGDR.[G]				3	3	3	pcri_g8720.t1; pcri_g8718.t1; pcri_g8716.t1	pcri_g8720.t1 pcri_g8718.t1 pcri_g8716.t1	pcri_g8720.t1 [179-202]; pcri_g8718.t1 [243-266]; pcri_g8716.t1 [243-266]	1	2662.29	Not Found	Not Found	Not Found	Not Found	Not Found	Not Found	Not Found	High	Not Found	Not Found	Not Found	Not Found	Not Found	Not Found	Not Found	Not Found	Not Found	High	Not Found	Not Found	Not Found	High	6.11	K.GPIENAKDHLASPFEANIFTYGDR.G	[179-202]
		Checked	Confidence		Identifying Node	PSM Ambiguity	Annotated Sequence	Modifications	# Protein Groups	# Proteins	Master Protein Accessions	Protein Accessions	# Missed Cleavages	Charge	MS Order	DeltaScore	Isolation Interference [%]	DeltaCn	Ion Inject Time [ms]	Rank	RT [min]	Search Engine Rank	Spectrum File	MH+ [Da]
		FALSE	High		Sequest HT (Q2)	Unambiguous	[K].GPIENAKDHLASPFEANIFTYGDR.[G]		3	3	pcri_g8720.t1; pcri_g8718.t1; pcri_g8716.t1	pcri_g8720.t1; pcri_g8718.t1; pcri_g8716.t1	1	3	MS2	0.6056		0	200	1	32.0034	1	20171202_04.RAW	2664.41
		FALSE	High		Sequest HT (AJ2)	Unambiguous	[K].GPIENAKDHLASPFEANIFTYGDR.[G]		3	3	pcri_g8720.t1; pcri_g8718.t1; pcri_g8716.t1	pcri_g8720.t1; pcri_g8718.t1; pcri_g8716.t1	1	3	MS2	0.5537		0	200	1	33.4866	1	20171101_04.RAW	2664.57
		FALSE	High		Sequest HT (P2)	Unambiguous	[K].GPIENAKDHLASPFEANIFTYGDR.[G]		3	3	pcri_g8720.t1; pcri_g8718.t1; pcri_g8716.t1	pcri_g8720.t1; pcri_g8718.t1; pcri_g8716.t1	1	3	MS2	0.4671		0	200	1	32.2316	1	20171202_05.RAW	2663.03
	FALSE	High	[K].GPIENAK.[D]				4	4	6	pcri_g8720.t1; pcri_g8718.t1; pcri_g8045.t1; pcri_g8716.t1	pcri_g8720.t1 pcri_g8718.t1 pcri_g8045.t1 pcri_g8716.t1	pcri_g8720.t1 [179-185]; pcri_g8718.t1 [243-249]; pcri_g8045.t1 [238-244]; pcri_g8716.t1 [243-249]	0	728.394	Not Found	Not Found	Not Found	High	Not Found	Not Found	Not Found	High	Not Found	Not Found	Not Found	Not Found	Not Found	High	Not Found	Not Found	Not Found	Not Found	Not Found	Not Found	Not Found	High	1.79	K.GPIENAK.D	[179-185]
		Checked	Confidence		Identifying Node	PSM Ambiguity	Annotated Sequence	Modifications	# Protein Groups	# Proteins	Master Protein Accessions	Protein Accessions	# Missed Cleavages	Charge	MS Order	DeltaScore	Isolation Interference [%]	DeltaCn	Ion Inject Time [ms]	Rank	RT [min]	Search Engine Rank	Spectrum File	MH+ [Da]
		FALSE	High		Sequest HT (AJ2)	Unambiguous	[K].GPIENAK.[D]		4	4	pcri_g8720.t1; pcri_g8718.t1; pcri_g8045.t1; pcri_g8716.t1	pcri_g8720.t1; pcri_g8718.t1; pcri_g8045.t1; pcri_g8716.t1	0	1	MS2	0.2011		0	200	1	13.6354	1	20171101_04.RAW	728.73
		FALSE	High		Sequest HT (S2)	Unambiguous	[K].GPIENAK.[D]		4	4	pcri_g8720.t1; pcri_g8718.t1; pcri_g8045.t1; pcri_g8716.t1	pcri_g8720.t1; pcri_g8718.t1; pcri_g8045.t1; pcri_g8716.t1	0	1	MS2	0.226		0	200	1	11.3199	1	20171202_02.RAW	728.608
		FALSE	High		Sequest HT (AD2)	Unambiguous	[K].GPIENAK.[D]		4	4	pcri_g8720.t1; pcri_g8718.t1; pcri_g8045.t1; pcri_g8716.t1	pcri_g8720.t1; pcri_g8718.t1; pcri_g8045.t1; pcri_g8716.t1	0	1	MS2	0.1698		0	200	1	13.5867	1	20171101_10.RAW	728.544
		FALSE	High		Sequest HT (AL2)	Unambiguous	[K].GPIENAK.[D]		4	4	pcri_g8720.t1; pcri_g8718.t1; pcri_g8045.t1; pcri_g8716.t1	pcri_g8720.t1; pcri_g8718.t1; pcri_g8045.t1; pcri_g8716.t1	0	1	MS2	0.1203		0	200	1	14.9467	1	20171101_02.RAW	728.56
		FALSE	High		Sequest HT (AI2)	Unambiguous	[K].GPIENAK.[D]		4	4	pcri_g8720.t1; pcri_g8718.t1; pcri_g8045.t1; pcri_g8716.t1	pcri_g8720.t1; pcri_g8718.t1; pcri_g8045.t1; pcri_g8716.t1	0	1	MS2	0.2792		0	200	1	13.2061	1	20171101_05.RAW	728.569
		FALSE	High		Sequest HT (AI2)	Unambiguous	[K].GPIENAK.[D]		4	4	pcri_g8720.t1; pcri_g8718.t1; pcri_g8045.t1; pcri_g8716.t1	pcri_g8720.t1; pcri_g8718.t1; pcri_g8045.t1; pcri_g8716.t1	0	1	MS2	0.1565		0	200	1	14.4819	1	20171101_05.RAW	728.552
FALSE	Master Protein	pcri_g8045.t1	BDA47009.1 Photosystem I chlorophyll a/b-binding protein 3-1, chloroplastic [Coccomyxa sp. Obi]	Pc-frLHC4	44	8	268	5	1	300	33.3	5.68	933.36	8	Not Found	High	High	Not Found	Not Found	Not Found	Not Found	Not Found	Not Found	Not Found	Not Found	High	Not Found	High	Not Found	Not Found	Not Found	Not Found	Not Found	Not Found	Not Found
	Checked	Confidence	Annotated Sequence		Modifications	Modifications in Master Proteins	# Protein Groups	# Proteins	# PSMs	Master Protein Accessions	Master Protein Descriptions	Positions in Master Proteins	# Missed Cleavages	Theo. MH+ [Da]	Found in Sample: [S11] F11: Sample	Found in Sample: [S1] F1: Sample	Found in Sample: [S12] F12: Sample	Found in Sample: [S2] F2: Sample	Found in Sample: [S13] F13: Sample	Found in Sample: [S3] F3: Sample	Found in Sample: [S14] F14: Sample	Found in Sample: [S4] F4: Sample	Found in Sample: [S16] F16: Sample	Found in Sample: [S6] F6: Sample	Found in Sample: [S30] F30: Sample	Found in Sample: [S20] F20: Sample	Found in Sample: [S31] F31: Sample	Found in Sample: [S21] F21: Sample	Found in Sample: [S32] F32: Sample	Found in Sample: [S22] F22: Sample	Found in Sample: [S33] F33: Sample	Found in Sample: [S23] F23: Sample	Found in Sample: [S35] F35: Sample	Found in Sample: [S25] F25: Sample	Found in Sample: [S36] F36: Sample	Confidence (by Search Engine): Sequest HT	XCorr (by Search Engine): Sequest HT	Sequence in Protein	Positions in Protein	Peptide Group Modifications in Protein
	FALSE	High	[R].NQTQQALGNR.[T]				1	1	9	pcri_g8045.t1	pcri_g8045.t1	pcri_g8045.t1 [286-295]	0	1129.57	Not Found	High	Not Found	Not Found	Not Found	Not Found	Not Found	Not Found	Not Found	Not Found	Not Found	High	Not Found	Not Found	Not Found	Not Found	Not Found	Not Found	Not Found	Not Found	Not Found	High	3.29	R.NQTQQALGNR.T	[286-295]
		Checked	Confidence		Identifying Node	PSM Ambiguity	Annotated Sequence	Modifications	# Protein Groups	# Proteins	Master Protein Accessions	Protein Accessions	# Missed Cleavages	Charge	MS Order	DeltaScore	Isolation Interference [%]	DeltaCn	Ion Inject Time [ms]	Rank	RT [min]	Search Engine Rank	Spectrum File	MH+ [Da]
		FALSE	High		Sequest HT (AM2)	Unambiguous	[R].NQTQQALGNR.[T]		1	1	pcri_g8045.t1	pcri_g8045.t1	0	2	MS2	0.4863		0	200	1	15.698	1	20171101_01.RAW	1130.24
		FALSE	High		Sequest HT (T2)	Unambiguous	[R].NQTQQALGNR.[T]		1	1	pcri_g8045.t1	pcri_g8045.t1	0	2	MS2	0.4348		0	200	1	13.0751	1	20171202_01.RAW	1130.46
		FALSE	High		Sequest HT (AM2)	Unambiguous	[R].NQTQQALGNR.[T]		1	1	pcri_g8045.t1	pcri_g8045.t1	0	2	MS2	0.522		0	200	1	17.3319	1	20171101_01.RAW	1130.84
		FALSE	High		Sequest HT (T2)	Unambiguous	[R].NQTQQALGNR.[T]		1	1	pcri_g8045.t1	pcri_g8045.t1	0	2	MS2	0.4791		0	200	1	13.6441	1	20171202_01.RAW	1130.29
		FALSE	High		Sequest HT (AM2)	Unambiguous	[R].NQTQQALGNR.[T]		1	1	pcri_g8045.t1	pcri_g8045.t1	0	2	MS2	0.4686		0	200	1	16.2426	1	20171101_01.RAW	1130.3
		FALSE	High		Sequest HT (T2)	Unambiguous	[R].NQTQQALGNR.[T]		1	1	pcri_g8045.t1	pcri_g8045.t1	0	2	MS2	0.34		0	200	1	14.1911	1	20171202_01.RAW	1131.07
		FALSE	High		Sequest HT (AM2)	Unambiguous	[R].NQTQQALGNR.[T]		1	1	pcri_g8045.t1	pcri_g8045.t1	0	2	MS2	0.4897		0	200	1	18.4558	1	20171101_01.RAW	1130.09
		FALSE	High		Sequest HT (AM2)	Unambiguous	[R].NQTQQALGNR.[T]		1	1	pcri_g8045.t1	pcri_g8045.t1	0	2	MS2	0.5559		0	200	1	15.1526	1	20171101_01.RAW	1129.55
		FALSE	High		Sequest HT (AM2)	Unambiguous	[R].NQTQQALGNR.[T]		1	1	pcri_g8045.t1	pcri_g8045.t1	0	2	MS2	0.4558		0	200	1	17.8778	1	20171101_01.RAW	1130.4
	FALSE	High	[R].YFTDSAAVSGPPNTLLK.[E]				1	1	9	pcri_g8045.t1	pcri_g8045.t1	pcri_g8045.t1 [35-51]	0	1780.91	Not Found	High	High	Not Found	Not Found	Not Found	Not Found	Not Found	Not Found	Not Found	Not Found	High	Not Found	High	Not Found	Not Found	Not Found	Not Found	Not Found	Not Found	Not Found	High	5.59	R.YFTDSAAVSGPPNTLLK.E	[35-51]
		Checked	Confidence		Identifying Node	PSM Ambiguity	Annotated Sequence	Modifications	# Protein Groups	# Proteins	Master Protein Accessions	Protein Accessions	# Missed Cleavages	Charge	MS Order	DeltaScore	Isolation Interference [%]	DeltaCn	Ion Inject Time [ms]	Rank	RT [min]	Search Engine Rank	Spectrum File	MH+ [Da]
		FALSE	High		Sequest HT (AM2)	Unambiguous	[R].YFTDSAAVSGPPNTLLK.[E]		1	1	pcri_g8045.t1	pcri_g8045.t1	0	2	MS2	0.7156		0	62.934	1	31.3412	1	20171101_01.RAW	1782.36
		FALSE	High		Sequest HT (T2)	Unambiguous	[R].YFTDSAAVSGPPNTLLK.[E]		1	1	pcri_g8045.t1	pcri_g8045.t1	0	2	MS2	0.5628		0	200	1	28.5884	1	20171202_01.RAW	1784.69
		FALSE	High		Sequest HT (T2)	Unambiguous	[R].YFTDSAAVSGPPNTLLK.[E]		1	1	pcri_g8045.t1	pcri_g8045.t1	0	2	MS2	0.6624		0	200	1	29.2815	1	20171202_01.RAW	1782.14
		FALSE	High		Sequest HT (S2)	Unambiguous	[R].YFTDSAAVSGPPNTLLK.[E]		1	1	pcri_g8045.t1	pcri_g8045.t1	0	2	MS2	0.6674		0	200	1	28.1873	1	20171202_02.RAW	1782.25
		FALSE	High		Sequest HT (T2)	Unambiguous	[R].YFTDSAAVSGPPNTLLK.[E]		1	1	pcri_g8045.t1	pcri_g8045.t1	0	2	MS2	0.6027		0	200	1	28.1793	1	20171202_01.RAW	1781.66
		FALSE	High		Sequest HT (T2)	Unambiguous	[R].YFTDSAAVSGPPNTLLK.[E]		1	1	pcri_g8045.t1	pcri_g8045.t1	0	2	MS2	0.753		0	200	1	28.7298	1	20171202_01.RAW	1781.44
		FALSE	High		Sequest HT (AM2)	Unambiguous	[R].YFTDSAAVSGPPNTLLK.[E]		1	1	pcri_g8045.t1	pcri_g8045.t1	0	2	MS2	0.6683		0	200	1	31.8992	1	20171101_01.RAW	1781.45
		FALSE	High		Sequest HT (AB2)	Unambiguous	[R].YFTDSAAVSGPPNTLLK.[E]		1	1	pcri_g8045.t1	pcri_g8045.t1	0	2	MS2	0.6505		0	200	1	31.1617	1	20171101_blank02.RAW	1781.17
		FALSE	High		Sequest HT (AM2)	Unambiguous	[R].YFTDSAAVSGPPNTLLK.[E]		1	1	pcri_g8045.t1	pcri_g8045.t1	0	2	MS2	0.5887		0	200	1	40.5	1	20171101_01.RAW	1782.24
	FALSE	High	[R].WLLEGELYNGR.[LV]				4	4	232	pcri_g8720.t1; pcri_g8718.t1; pcri_g8045.t1; pcri_g8716.t1	pcri_g8720.t1 pcri_g8718.t1 pcri_g8045.t1 pcri_g8716.t1	pcri_g8720.t1 [55-65]; pcri_g8718.t1 [119-129]; pcri_g8045.t1 [114-124]; pcri_g8716.t1 [119-129]	0	1349.68	Not Found	High	High	High	High	High	High	High	High	High	Not Found	High	Not Found	High	Not Found	High	Not Found	High	Not Found	Not Found	Not Found	High	4.47	R.WLLEGELYNGR.L	[114-124]
		Checked	Confidence		Identifying Node	PSM Ambiguity	Annotated Sequence	Modifications	# Protein Groups	# Proteins	Master Protein Accessions	Protein Accessions	# Missed Cleavages	Charge	MS Order	DeltaScore	Isolation Interference [%]	DeltaCn	Ion Inject Time [ms]	Rank	RT [min]	Search Engine Rank	Spectrum File	MH+ [Da]
		FALSE	High		Sequest HT (Q2)	Unambiguous	[R].WLLEGELYNGR.[LV]		4	4	pcri_g8720.t1; pcri_g8718.t1; pcri_g8045.t1; pcri_g8716.t1	pcri_g8720.t1; pcri_g8718.t1; pcri_g8045.t1; pcri_g8716.t1	0	2	MS2	0.481		0	200	1	33.3113	1	20171202_04.RAW	1350.15
		FALSE	High		Sequest HT (AD2)	Unambiguous	[R].WLLEGELYNGR.[LV]		4	4	pcri_g8720.t1; pcri_g8718.t1; pcri_g8045.t1; pcri_g8716.t1	pcri_g8720.t1; pcri_g8718.t1; pcri_g8045.t1; pcri_g8716.t1	0	2	MS2	0.537		0	200	1	58.2889	1	20171101_10.RAW	1351.69
		FALSE	High		Sequest HT (AD2)	Unambiguous	[R].WLLEGELYNGR.[LV]		4	4	pcri_g8720.t1; pcri_g8718.t1; pcri_g8045.t1; pcri_g8716.t1	pcri_g8720.t1; pcri_g8718.t1; pcri_g8045.t1; pcri_g8716.t1	0	2	MS2	0.5361		0	200	1	47.0399	1	20171101_10.RAW	1350.55
		FALSE	High		Sequest HT (S2)	Unambiguous	[R].WLLEGELYNGR.[LV]		4	4	pcri_g8720.t1; pcri_g8718.t1; pcri_g8045.t1; pcri_g8716.t1	pcri_g8720.t1; pcri_g8718.t1; pcri_g8045.t1; pcri_g8716.t1	0	2	MS2	0.534		0	200	1	32.977	1	20171202_02.RAW	1350.47
		FALSE	High		Sequest HT (K2)	Unambiguous	[R].WLLEGELYNGR.[LV]		4	4	pcri_g8720.t1; pcri_g8718.t1; pcri_g8045.t1; pcri_g8716.t1	pcri_g8720.t1; pcri_g8718.t1; pcri_g8045.t1; pcri_g8716.t1	0	2	MS2	0.467		0	200	1	33.95	1	20171202_10.RAW	1351.2
		FALSE	High		Sequest HT (AJ2)	Unambiguous	[R].WLLEGELYNGR.[LV]		4	4	pcri_g8720.t1; pcri_g8718.t1; pcri_g8045.t1; pcri_g8716.t1	pcri_g8720.t1; pcri_g8718.t1; pcri_g8045.t1; pcri_g8716.t1	0	2	MS2	0.5849		0	200	1	46.6093	1	20171101_04.RAW	1350.56
		FALSE	High		Sequest HT (AD2)	Unambiguous	[R].WLLEGELYNGR.[LV]		4	4	pcri_g8720.t1; pcri_g8718.t1; pcri_g8045.t1; pcri_g8716.t1	pcri_g8720.t1; pcri_g8718.t1; pcri_g8045.t1; pcri_g8716.t1	0	2	MS2	0.5319		0	200	1	57.7429	1	20171101_10.RAW	1350.48
		FALSE	High		Sequest HT (P2)	Unambiguous	[R].WLLEGELYNGR.[LV]		4	4	pcri_g8720.t1; pcri_g8718.t1; pcri_g8045.t1; pcri_g8716.t1	pcri_g8720.t1; pcri_g8718.t1; pcri_g8045.t1; pcri_g8716.t1	0	2	MS2	0.5201		0	200	1	32.1449	1	20171202_05.RAW	1350.22
		FALSE	High		Sequest HT (AJ2)	Unambiguous	[R].WLLEGELYNGR.[LV]		4	4	pcri_g8720.t1; pcri_g8718.t1; pcri_g8045.t1; pcri_g8716.t1	pcri_g8720.t1; pcri_g8718.t1; pcri_g8045.t1; pcri_g8716.t1	0	2	MS2	0.5071		0	200	1	58.9083	1	20171101_04.RAW	1351.44
		FALSE	High		Sequest HT (AD2)	Unambiguous	[R].WLLEGELYNGR.[LV]		4	4	pcri_g8720.t1; pcri_g8718.t1; pcri_g8045.t1; pcri_g8716.t1	pcri_g8720.t1; pcri_g8718.t1; pcri_g8045.t1; pcri_g8716.t1	0	2	MS2	0.4893		0	200	1	34.8911	1	20171101_10.RAW	1349.65
		FALSE	High		Sequest HT (AJ2)	Unambiguous	[R].WLLEGELYNGR.[LV]		4	4	pcri_g8720.t1; pcri_g8718.t1; pcri_g8045.t1; pcri_g8716.t1	pcri_g8720.t1; pcri_g8718.t1; pcri_g8045.t1; pcri_g8716.t1	0	2	MS2	0.5333		0	200	1	49.9738	1	20171101_04.RAW	1351.57
		FALSE	High		Sequest HT (AD2)	Unambiguous	[R].WLLEGELYNGR.[LV]		4	4	pcri_g8720.t1; pcri_g8718.t1; pcri_g8045.t1; pcri_g8716.t1	pcri_g8720.t1; pcri_g8718.t1; pcri_g8045.t1; pcri_g8716.t1	0	2	MS2	0.5048		0	200	1	35.5361	1	20171101_10.RAW	1351.34
		FALSE	High		Sequest HT (Y2)	Unambiguous	[R].WLLEGELYNGR.[LV]		4	4	pcri_g8720.t1; pcri_g8718.t1; pcri_g8045.t1; pcri_g8716.t1	pcri_g8720.t1; pcri_g8718.t1; pcri_g8045.t1; pcri_g8716.t1	0	2	MS2	0.5096		0	200	1	34.7287	1	20171101_blank05.RAW	1350.57
		FALSE	High		Sequest HT (K2)	Unambiguous	[R].WLLEGELYNGR.[LV]		4	4	pcri_g8720.t1; pcri_g8718.t1; pcri_g8045.t1; pcri_g8716.t1	pcri_g8720.t1; pcri_g8718.t1; pcri_g8045.t1; pcri_g8716.t1	0	2	MS2	0.5933		0	200	1	33.3824	1	20171202_10.RAW	1350.3
		FALSE	High		Sequest HT (Q2)	Unambiguous	[R].WLLEGELYNGR.[LV]		4	4	pcri_g8720.t1; pcri_g8718.t1; pcri_g8045.t1; pcri_g8716.t1	pcri_g8720.t1; pcri_g8718.t1; pcri_g8045.t1; pcri_g8716.t1	0	2	MS2	0.554		0	131.046	1	32.1857	1	20171202_04.RAW	1352.46
		FALSE	High		Sequest HT (AD2)	Unambiguous	[R].WLLEGELYNGR.[LV]		4	4	pcri_g8720.t1; pcri_g8718.t1; pcri_g8045.t1; pcri_g8716.t1	pcri_g8720.t1; pcri_g8718.t1; pcri_g8045.t1; pcri_g8716.t1	0	2	MS2	0.5505		0	200	1	59.4527	1	20171101_10.RAW	1351.51
		FALSE	High		Sequest HT (AD2)	Unambiguous	[R].WLLEGELYNGR.[LV]		4	4	pcri_g8720.t1; pcri_g8718.t1; pcri_g8045.t1; pcri_g8716.t1	pcri_g8720.t1; pcri_g8718.t1; pcri_g8045.t1; pcri_g8716.t1	0	2	MS2	0.5529		0	200	1	48.72	1	20171101_10.RAW	1350.55
		FALSE	High		Sequest HT (AJ2)	Unambiguous	[R].WLLEGELYNGR.[LV]		4	4	pcri_g8720.t1; pcri_g8718.t1; pcri_g8045.t1; pcri_g8716.t1	pcri_g8720.t1; pcri_g8718.t1; pcri_g8045.t1; pcri_g8716.t1	0	2	MS2	0.5628		0	200	1	35.2517	1	20171101_04.RAW	1350.32
		FALSE	High		Sequest HT (R2)	Unambiguous	[R].WLLEGELYNGR.[LV]		4	4	pcri_g8720.t1; pcri_g8718.t1; pcri_g8045.t1; pcri_g8716.t1	pcri_g8720.t1; pcri_g8718.t1; pcri_g8045.t1; pcri_g8716.t1	0	2	MS2	0.5193		0	200	1	32.5997	1	20171202_03.RAW	1350.72
		FALSE	High		Sequest HT (AD2)	Unambiguous	[R].WLLEGELYNGR.[LV]		4	4	pcri_g8720.t1; pcri_g8718.t1; pcri_g8045.t1; pcri_g8716.t1	pcri_g8720.t1; pcri_g8718.t1; pcri_g8045.t1; pcri_g8716.t1	0	2	MS2	0.57		0	200	1	54.0876	1	20171101_10.RAW	1350.45
		FALSE	High		Sequest HT (Q2)	Unambiguous	[R].WLLEGELYNGR.[LV]		4	4	pcri_g8720.t1; pcri_g8718.t1; pcri_g8045.t1; pcri_g8716.t1	pcri_g8720.t1; pcri_g8718.t1; pcri_g8045.t1; pcri_g8716.t1	0	2	MS2	0.5327		0	167.959	1	32.7276	1	20171202_04.RAW	1350.06
		FALSE	High		Sequest HT (U2)	Unambiguous	[R].WLLEGELYNGR.[LV]		4	4	pcri_g8720.t1; pcri_g8718.t1; pcri_g8045.t1; pcri_g8716.t1	pcri_g8720.t1; pcri_g8718.t1; pcri_g8045.t1; pcri_g8716.t1	0	2	MS2	0.5496		0	200	1	34.6248	1	20171101_blank09.RAW	1351.39
		FALSE	High		Sequest HT (AJ2)	Unambiguous	[R].WLLEGELYNGR.[LV]		4	4	pcri_g8720.t1; pcri_g8718.t1; pcri_g8045.t1; pcri_g8716.t1	pcri_g8720.t1; pcri_g8718.t1; pcri_g8045.t1; pcri_g8716.t1	0	2	MS2	0.5157		0	200	1	44.2289	1	20171101_04.RAW	1350.48
		FALSE	High		Sequest HT (AD2)	Unambiguous	[R].WLLEGELYNGR.[LV]		4	4	pcri_g8720.t1; pcri_g8718.t1; pcri_g8045.t1; pcri_g8716.t1	pcri_g8720.t1; pcri_g8718.t1; pcri_g8045.t1; pcri_g8716.t1	0	2	MS2	0.5572		0	200	1	55.3082	1	20171101_10.RAW	1350.33
		FALSE	High		Sequest HT (AD2)	Unambiguous	[R].WLLEGELYNGR.[LV]		4	4	pcri_g8720.t1; pcri_g8718.t1; pcri_g8045.t1; pcri_g8716.t1	pcri_g8720.t1; pcri_g8718.t1; pcri_g8045.t1; pcri_g8716.t1	0	2	MS2	0.5232		0	200	1	49.3408	1	20171101_10.RAW	1350.56
		FALSE	High		Sequest HT (S2)	Unambiguous	[R].WLLEGELYNGR.[LV]		4	4	pcri_g8720.t1; pcri_g8718.t1; pcri_g8045.t1; pcri_g8716.t1	pcri_g8720.t1; pcri_g8718.t1; pcri_g8045.t1; pcri_g8716.t1	0	2	MS2	0.5135		0	195.23	1	32.4281	1	20171202_02.RAW	1349.88
		FALSE	High		Sequest HT (AG2)	Unambiguous	[R].WLLEGELYNGR.[LV]		4	4	pcri_g8720.t1; pcri_g8718.t1; pcri_g8045.t1; pcri_g8716.t1	pcri_g8720.t1; pcri_g8718.t1; pcri_g8045.t1; pcri_g8716.t1	0	2	MS2	0.5332		0	97.362	1	34.2991	1	20171101_07.RAW	1350.45
		FALSE	High		Sequest HT (AJ2)	Unambiguous	[R].WLLEGELYNGR.[LV]		4	4	pcri_g8720.t1; pcri_g8718.t1; pcri_g8045.t1; pcri_g8716.t1	pcri_g8720.t1; pcri_g8718.t1; pcri_g8045.t1; pcri_g8716.t1	0	2	MS2	0.5369		0	200	1	59.9981	1	20171101_04.RAW	1350.53
		FALSE	High		Sequest HT (AJ2)	Unambiguous	[R].WLLEGELYNGR.[LV]		4	4	pcri_g8720.t1; pcri_g8718.t1; pcri_g8045.t1; pcri_g8716.t1	pcri_g8720.t1; pcri_g8718.t1; pcri_g8045.t1; pcri_g8716.t1	0	2	MS2	0.521		0	200	1	42.297	1	20171101_04.RAW	1350.45
		FALSE	High		Sequest HT (AD2)	Unambiguous	[R].WLLEGELYNGR.[LV]		4	4	pcri_g8720.t1; pcri_g8718.t1; pcri_g8045.t1; pcri_g8716.t1	pcri_g8720.t1; pcri_g8718.t1; pcri_g8045.t1; pcri_g8716.t1	0	2	MS2	0.5309		0	200	1	50.9998	1	20171101_10.RAW	1350.76
		FALSE	High		Sequest HT (AJ2)	Unambiguous	[R].WLLEGELYNGR.[LV]		4	4	pcri_g8720.t1; pcri_g8718.t1; pcri_g8045.t1; pcri_g8716.t1	pcri_g8720.t1; pcri_g8718.t1; pcri_g8045.t1; pcri_g8716.t1	0	2	MS2	0.5704		0	200	1	46.0542	1	20171101_04.RAW	1350.75
		FALSE	High		Sequest HT (K2)	Unambiguous	[R].WLLEGELYNGR.[LV]		4	4	pcri_g8720.t1; pcri_g8718.t1; pcri_g8045.t1; pcri_g8716.t1	pcri_g8720.t1; pcri_g8718.t1; pcri_g8045.t1; pcri_g8716.t1	0	2	MS2	0.552		0	200	1	32.1416	1	20171202_10.RAW	1350.32
		FALSE	High		Sequest HT (AD2)	Unambiguous	[R].WLLEGELYNGR.[LV]		4	4	pcri_g8720.t1; pcri_g8718.t1; pcri_g8045.t1; pcri_g8716.t1	pcri_g8720.t1; pcri_g8718.t1; pcri_g8045.t1; pcri_g8716.t1	0	2	MS2	0.4938		0	200	1	58.8386	1	20171101_10.RAW	1351.28
		FALSE	High		Sequest HT (AG2)	Unambiguous	[R].WLLEGELYNGR.[LV]		4	4	pcri_g8720.t1; pcri_g8718.t1; pcri_g8045.t1; pcri_g8716.t1	pcri_g8720.t1; pcri_g8718.t1; pcri_g8045.t1; pcri_g8716.t1	0	2	MS2	0.5174		0	200	1	43.6272	1	20171101_07.RAW	1351.38
		FALSE	High		Sequest HT (AD2)	Unambiguous	[R].WLLEGELYNGR.[LV]		4	4	pcri_g8720.t1; pcri_g8718.t1; pcri_g8045.t1; pcri_g8716.t1	pcri_g8720.t1; pcri_g8718.t1; pcri_g8045.t1; pcri_g8716.t1	0	2	MS2	0.5411		0	200	1	34.3425	1	20171101_10.RAW	1350.43
		FALSE	High		Sequest HT (P2)	Unambiguous	[R].WLLEGELYNGR.[LV]		4	4	pcri_g8720.t1; pcri_g8718.t1; pcri_g8045.t1; pcri_g8716.t1	pcri_g8720.t1; pcri_g8718.t1; pcri_g8045.t1; pcri_g8716.t1	0	2	MS2	0.4888		0	200	1	34.2263	1	20171202_05.RAW	1350.72
		FALSE	High		Sequest HT (AI2)	Unambiguous	[R].WLLEGELYNGR.[LV]		4	4	pcri_g8720.t1; pcri_g8718.t1; pcri_g8045.t1; pcri_g8716.t1	pcri_g8720.t1; pcri_g8718.t1; pcri_g8045.t1; pcri_g8716.t1	0	2	MS2	0.5038		0	200	1	34.6543	1	20171101_05.RAW	1350.06
		FALSE	High		Sequest HT (M2)	Unambiguous	[R].WLLEGELYNGR.[LV]		4	4	pcri_g8720.t1; pcri_g8718.t1; pcri_g8045.t1; pcri_g8716.t1	pcri_g8720.t1; pcri_g8718.t1; pcri_g8045.t1; pcri_g8716.t1	0	2	MS2	0.4987		0	200	1	32.3297	1	20171202_08.RAW	1352.38
		FALSE	High		Sequest HT (N2)	Unambiguous	[R].WLLEGELYNGR.[LV]		4	4	pcri_g8720.t1; pcri_g8718.t1; pcri_g8045.t1; pcri_g8716.t1	pcri_g8720.t1; pcri_g8718.t1; pcri_g8045.t1; pcri_g8716.t1	0	2	MS2	0.5264		0	200	1	31.9466	1	20171202_07.RAW	1350.45
		FALSE	High		Sequest HT (AL2)	Unambiguous	[R].WLLEGELYNGR.[LV]		4	4	pcri_g8720.t1; pcri_g8718.t1; pcri_g8045.t1; pcri_g8716.t1	pcri_g8720.t1; pcri_g8718.t1; pcri_g8045.t1; pcri_g8716.t1	0	2	MS2	0.471		0	200	1	35.0702	1	20171101_02.RAW	1351.24
		FALSE	High		Sequest HT (AD2)	Unambiguous	[R].WLLEGELYNGR.[LV]		4	4	pcri_g8720.t1; pcri_g8718.t1; pcri_g8045.t1; pcri_g8716.t1	pcri_g8720.t1; pcri_g8718.t1; pcri_g8045.t1; pcri_g8716.t1	0	2	MS2	0.5		0	200	1	37.1643	1	20171101_10.RAW	1351
		FALSE	High		Sequest HT (R2)	Unambiguous	[R].WLLEGELYNGR.[LV]		4	4	pcri_g8720.t1; pcri_g8718.t1; pcri_g8045.t1; pcri_g8716.t1	pcri_g8720.t1; pcri_g8718.t1; pcri_g8045.t1; pcri_g8716.t1	0	2	MS2	0.5505		0	200	1	31.8291	1	20171202_03.RAW	1350.46
		FALSE	High		Sequest HT (AJ2)	Unambiguous	[R].WLLEGELYNGR.[LV]		4	4	pcri_g8720.t1; pcri_g8718.t1; pcri_g8045.t1; pcri_g8716.t1	pcri_g8720.t1; pcri_g8718.t1; pcri_g8045.t1; pcri_g8716.t1	0	2	MS2	0.5126		0	200	1	58.3607	1	20171101_04.RAW	1350.1
		FALSE	High		Sequest HT (AK2)	Unambiguous	[R].WLLEGELYNGR.[LV]		4	4	pcri_g8720.t1; pcri_g8718.t1; pcri_g8045.t1; pcri_g8716.t1	pcri_g8720.t1; pcri_g8718.t1; pcri_g8045.t1; pcri_g8716.t1	0	2	MS2	0.5418		0	200	1	34.4824	1	20171101_03.RAW	1350.33
		FALSE	High		Sequest HT (AI2)	Unambiguous	[R].WLLEGELYNGR.[LV]		4	4	pcri_g8720.t1; pcri_g8718.t1; pcri_g8045.t1; pcri_g8716.t1	pcri_g8720.t1; pcri_g8718.t1; pcri_g8045.t1; pcri_g8716.t1	0	2	MS2	0.5544		0	200	1	46.2502	1	20171101_05.RAW	1350.49
		FALSE	High		Sequest HT (AD2)	Unambiguous	[R].WLLEGELYNGR.[LV]		4	4	pcri_g8720.t1; pcri_g8718.t1; pcri_g8045.t1; pcri_g8716.t1	pcri_g8720.t1; pcri_g8718.t1; pcri_g8045.t1; pcri_g8716.t1	0	2	MS2	0.5089		0	200	1	36.3017	1	20171101_10.RAW	1350.66
		FALSE	High		Sequest HT (AI2)	Unambiguous	[R].WLLEGELYNGR.[LV]		4	4	pcri_g8720.t1; pcri_g8718.t1; pcri_g8045.t1; pcri_g8716.t1	pcri_g8720.t1; pcri_g8718.t1; pcri_g8045.t1; pcri_g8716.t1	0	2	MS2	0.5761		0	200	1	58.5217	1	20171101_05.RAW	1350.24
		FALSE	High		Sequest HT (AD2)	Unambiguous	[R].WLLEGELYNGR.[LV]		4	4	pcri_g8720.t1; pcri_g8718.t1; pcri_g8045.t1; pcri_g8716.t1	pcri_g8720.t1; pcri_g8718.t1; pcri_g8045.t1; pcri_g8716.t1	0	2	MS2	0.4645		0	200	1	54.713	1	20171101_10.RAW	1351.45
		FALSE	High		Sequest HT (K2)	Unambiguous	[R].WLLEGELYNGR.[LV]		4	4	pcri_g8720.t1; pcri_g8718.t1; pcri_g8045.t1; pcri_g8716.t1	pcri_g8720.t1; pcri_g8718.t1; pcri_g8045.t1; pcri_g8716.t1	0	2	MS2	0.5598		0	200	1	32.6883	1	20171202_10.RAW	1349.75
		FALSE	High		Sequest HT (AD2)	Unambiguous	[R].WLLEGELYNGR.[LV]		4	4	pcri_g8720.t1; pcri_g8718.t1; pcri_g8045.t1; pcri_g8716.t1	pcri_g8720.t1; pcri_g8718.t1; pcri_g8045.t1; pcri_g8716.t1	0	2	MS2	0.4427		0	200	1	47.5958	1	20171101_10.RAW	1351.47
		FALSE	High		Sequest HT (AJ2)	Unambiguous	[R].WLLEGELYNGR.[LV]		4	4	pcri_g8720.t1; pcri_g8718.t1; pcri_g8045.t1; pcri_g8716.t1	pcri_g8720.t1; pcri_g8718.t1; pcri_g8045.t1; pcri_g8716.t1	0	2	MS2	0.5612		0	200	1	47.1938	1	20171101_04.RAW	1350.52
		FALSE	High		Sequest HT (V2)	Unambiguous	[R].WLLEGELYNGR.[LV]		4	4	pcri_g8720.t1; pcri_g8718.t1; pcri_g8045.t1; pcri_g8716.t1	pcri_g8720.t1; pcri_g8718.t1; pcri_g8045.t1; pcri_g8716.t1	0	2	MS2	0.5051		0	200	1	58.4834	1	20171101_blank08.RAW	1351.68
		FALSE	High		Sequest HT (AI2)	Unambiguous	[R].WLLEGELYNGR.[LV]		4	4	pcri_g8720.t1; pcri_g8718.t1; pcri_g8045.t1; pcri_g8716.t1	pcri_g8720.t1; pcri_g8718.t1; pcri_g8045.t1; pcri_g8716.t1	0	2	MS2	0.5448		0	200	1	38.6709	1	20171101_05.RAW	1350.93
		FALSE	High		Sequest HT (AJ2)	Unambiguous	[R].WLLEGELYNGR.[LV]		4	4	pcri_g8720.t1; pcri_g8718.t1; pcri_g8045.t1; pcri_g8716.t1	pcri_g8720.t1; pcri_g8718.t1; pcri_g8045.t1; pcri_g8716.t1	0	2	MS2	0.5908		0	200	1	53.9418	1	20171101_04.RAW	1350.57
		FALSE	High		Sequest HT (AL2)	Unambiguous	[R].WLLEGELYNGR.[LV]		4	4	pcri_g8720.t1; pcri_g8718.t1; pcri_g8045.t1; pcri_g8716.t1	pcri_g8720.t1; pcri_g8718.t1; pcri_g8045.t1; pcri_g8716.t1	0	2	MS2	0.4706		0	200	1	34.5014	1	20171101_02.RAW	1350
		FALSE	High		Sequest HT (AJ2)	Unambiguous	[R].WLLEGELYNGR.[LV]		4	4	pcri_g8720.t1; pcri_g8718.t1; pcri_g8045.t1; pcri_g8716.t1	pcri_g8720.t1; pcri_g8718.t1; pcri_g8045.t1; pcri_g8716.t1	0	2	MS2	0.5154		0	200	1	37.8915	1	20171101_04.RAW	1350.49
		FALSE	High		Sequest HT (AI2)	Unambiguous	[R].WLLEGELYNGR.[LV]		4	4	pcri_g8720.t1; pcri_g8718.t1; pcri_g8045.t1; pcri_g8716.t1	pcri_g8720.t1; pcri_g8718.t1; pcri_g8045.t1; pcri_g8716.t1	0	2	MS2	0.5872		0	200	1	59.7176	1	20171101_05.RAW	1350.47
		FALSE	High		Sequest HT (AJ2)	Unambiguous	[R].WLLEGELYNGR.[LV]		4	4	pcri_g8720.t1; pcri_g8718.t1; pcri_g8045.t1; pcri_g8716.t1	pcri_g8720.t1; pcri_g8718.t1; pcri_g8045.t1; pcri_g8716.t1	0	2	MS2	0.4744		0	200	1	57.8151	1	20171101_04.RAW	1350.34
		FALSE	High		Sequest HT (AD2)	Unambiguous	[R].WLLEGELYNGR.[LV]		4	4	pcri_g8720.t1; pcri_g8718.t1; pcri_g8045.t1; pcri_g8716.t1	pcri_g8720.t1; pcri_g8718.t1; pcri_g8045.t1; pcri_g8716.t1	0	2	MS2	0.5026		0	200	1	60.003	1	20171101_10.RAW	1351.4
		FALSE	High		Sequest HT (AD2)	Unambiguous	[R].WLLEGELYNGR.[LV]		4	4	pcri_g8720.t1; pcri_g8718.t1; pcri_g8045.t1; pcri_g8716.t1	pcri_g8720.t1; pcri_g8718.t1; pcri_g8045.t1; pcri_g8716.t1	0	2	MS2	0.4256		0	101.373	1	34.44	1	20171101_10.RAW	1353.57
		FALSE	High		Sequest HT (Q2)	Unambiguous	[R].WLLEGELYNGR.[LV]		4	4	pcri_g8720.t1; pcri_g8718.t1; pcri_g8045.t1; pcri_g8716.t1	pcri_g8720.t1; pcri_g8718.t1; pcri_g8045.t1; pcri_g8716.t1	0	2	MS2	0.5129		0	200	1	39.7902	1	20171202_04.RAW	1351.98
		FALSE	High		Sequest HT (AJ2)	Unambiguous	[R].WLLEGELYNGR.[LV]		4	4	pcri_g8720.t1; pcri_g8718.t1; pcri_g8045.t1; pcri_g8716.t1	pcri_g8720.t1; pcri_g8718.t1; pcri_g8045.t1; pcri_g8716.t1	0	2	MS2	0.5438		0	200	1	55.5994	1	20171101_04.RAW	1350.47
		FALSE	High		Sequest HT (AJ2)	Unambiguous	[R].WLLEGELYNGR.[LV]		4	4	pcri_g8720.t1; pcri_g8718.t1; pcri_g8045.t1; pcri_g8716.t1	pcri_g8720.t1; pcri_g8718.t1; pcri_g8045.t1; pcri_g8716.t1	0	2	MS2	0.5685		0	200	1	59.4534	1	20171101_04.RAW	1349.76
		FALSE	High		Sequest HT (AJ2)	Unambiguous	[R].WLLEGELYNGR.[LV]		4	4	pcri_g8720.t1; pcri_g8718.t1; pcri_g8045.t1; pcri_g8716.t1	pcri_g8720.t1; pcri_g8718.t1; pcri_g8045.t1; pcri_g8716.t1	0	2	MS2	0.4755		0	200	1	41.0718	1	20171101_04.RAW	1350.21
		FALSE	High		Sequest HT (AD2)	Unambiguous	[R].WLLEGELYNGR.[LV]		4	4	pcri_g8720.t1; pcri_g8718.t1; pcri_g8045.t1; pcri_g8716.t1	pcri_g8720.t1; pcri_g8718.t1; pcri_g8045.t1; pcri_g8716.t1	0	2	MS2	0.4663		0	200	1	43.1495	1	20171101_10.RAW	1350.63
		FALSE	High		Sequest HT (AJ2)	Unambiguous	[R].WLLEGELYNGR.[LV]		4	4	pcri_g8720.t1; pcri_g8718.t1; pcri_g8045.t1; pcri_g8716.t1	pcri_g8720.t1; pcri_g8718.t1; pcri_g8045.t1; pcri_g8716.t1	0	2	MS2	0.557		0	200	1	57.2462	1	20171101_04.RAW	1350.35
		FALSE	High		Sequest HT (Q2)	Unambiguous	[R].WLLEGELYNGR.[LV]		4	4	pcri_g8720.t1; pcri_g8718.t1; pcri_g8045.t1; pcri_g8716.t1	pcri_g8720.t1; pcri_g8718.t1; pcri_g8045.t1; pcri_g8716.t1	0	2	MS2	0.5221		0	200	1	34.4292	1	20171202_04.RAW	1350.64
		FALSE	High		Sequest HT (AJ2)	Unambiguous	[R].WLLEGELYNGR.[LV]		4	4	pcri_g8720.t1; pcri_g8718.t1; pcri_g8045.t1; pcri_g8716.t1	pcri_g8720.t1; pcri_g8718.t1; pcri_g8045.t1; pcri_g8716.t1	0	2	MS2	0.4442		0	44.52	1	34.1474	1	20171101_04.RAW	1353.19
		FALSE	High		Sequest HT (AJ2)	Unambiguous	[R].WLLEGELYNGR.[LV]		4	4	pcri_g8720.t1; pcri_g8718.t1; pcri_g8045.t1; pcri_g8716.t1	pcri_g8720.t1; pcri_g8718.t1; pcri_g8045.t1; pcri_g8716.t1	0	2	MS2	0.5339		0	200	1	34.0092	1	20171101_04.RAW	1350.01
		FALSE	High		Sequest HT (Q2)	Unambiguous	[R].WLLEGELYNGR.[LV]		4	4	pcri_g8720.t1; pcri_g8718.t1; pcri_g8045.t1; pcri_g8716.t1	pcri_g8720.t1; pcri_g8718.t1; pcri_g8045.t1; pcri_g8716.t1	0	2	MS2	0.5234		0	200	1	33.8663	1	20171202_04.RAW	1351.37
		FALSE	High		Sequest HT (AJ2)	Unambiguous	[R].WLLEGELYNGR.[LV]		4	4	pcri_g8720.t1; pcri_g8718.t1; pcri_g8045.t1; pcri_g8716.t1	pcri_g8720.t1; pcri_g8718.t1; pcri_g8045.t1; pcri_g8716.t1	0	2	MS2	0.5222		0	200	1	43.5643	1	20171101_04.RAW	1350.22
		FALSE	High		Sequest HT (P2)	Unambiguous	[R].WLLEGELYNGR.[LV]		4	4	pcri_g8720.t1; pcri_g8718.t1; pcri_g8045.t1; pcri_g8716.t1	pcri_g8720.t1; pcri_g8718.t1; pcri_g8045.t1; pcri_g8716.t1	0	2	MS2	0.5497		0	200	1	33.4544	1	20171202_05.RAW	1350.36
		FALSE	High		Sequest HT (AD2)	Unambiguous	[R].WLLEGELYNGR.[LV]		4	4	pcri_g8720.t1; pcri_g8718.t1; pcri_g8045.t1; pcri_g8716.t1	pcri_g8720.t1; pcri_g8718.t1; pcri_g8045.t1; pcri_g8716.t1	0	2	MS2	0.5		0	200	1	50.4427	1	20171101_10.RAW	1350.5
		FALSE	High		Sequest HT (AM2)	Unambiguous	[R].WLLEGELYNGR.[LV]		4	4	pcri_g8720.t1; pcri_g8718.t1; pcri_g8045.t1; pcri_g8716.t1	pcri_g8720.t1; pcri_g8718.t1; pcri_g8045.t1; pcri_g8716.t1	0	2	MS2	0.5393		0	200	1	34.487	1	20171101_01.RAW	1350.29
		FALSE	High		Sequest HT (AJ2)	Unambiguous	[R].WLLEGELYNGR.[LV]		4	4	pcri_g8720.t1; pcri_g8718.t1; pcri_g8045.t1; pcri_g8716.t1	pcri_g8720.t1; pcri_g8718.t1; pcri_g8045.t1; pcri_g8716.t1	0	2	MS2	0.5079		0	200	1	34.6925	1	20171101_04.RAW	1350.49
		FALSE	High		Sequest HT (AL2)	Unambiguous	[R].WLLEGELYNGR.[LV]		4	4	pcri_g8720.t1; pcri_g8718.t1; pcri_g8045.t1; pcri_g8716.t1	pcri_g8720.t1; pcri_g8718.t1; pcri_g8045.t1; pcri_g8716.t1	0	2	MS2	0.5445		0	200	1	33.8651	1	20171101_02.RAW	1350.27
		FALSE	High		Sequest HT (AI2)	Unambiguous	[R].WLLEGELYNGR.[LV]		4	4	pcri_g8720.t1; pcri_g8718.t1; pcri_g8045.t1; pcri_g8716.t1	pcri_g8720.t1; pcri_g8718.t1; pcri_g8045.t1; pcri_g8716.t1	0	2	MS2	0.5092		0	200	1	35.3219	1	20171101_05.RAW	1350.51
		FALSE	High		Sequest HT (AD2)	Unambiguous	[R].WLLEGELYNGR.[LV]		4	4	pcri_g8720.t1; pcri_g8718.t1; pcri_g8045.t1; pcri_g8716.t1	pcri_g8720.t1; pcri_g8718.t1; pcri_g8045.t1; pcri_g8716.t1	0	2	MS2	0.4436		0	200	1	43.8876	1	20171101_10.RAW	1350.73
		FALSE	High		Sequest HT (AJ2)	Unambiguous	[R].WLLEGELYNGR.[LV]		4	4	pcri_g8720.t1; pcri_g8718.t1; pcri_g8045.t1; pcri_g8716.t1	pcri_g8720.t1; pcri_g8718.t1; pcri_g8045.t1; pcri_g8716.t1	0	2	MS2	0.5407		0	200	1	51.0729	1	20171101_04.RAW	1350.29
		FALSE	High		Sequest HT (AD2)	Unambiguous	[R].WLLEGELYNGR.[LV]		4	4	pcri_g8720.t1; pcri_g8718.t1; pcri_g8045.t1; pcri_g8716.t1	pcri_g8720.t1; pcri_g8718.t1; pcri_g8045.t1; pcri_g8716.t1	0	2	MS2	0.5579		0	200	1	55.9145	1	20171101_10.RAW	1350.44
		FALSE	High		Sequest HT (AD2)	Unambiguous	[R].WLLEGELYNGR.[LV]		4	4	pcri_g8720.t1; pcri_g8718.t1; pcri_g8045.t1; pcri_g8716.t1	pcri_g8720.t1; pcri_g8718.t1; pcri_g8045.t1; pcri_g8716.t1	0	2	MS2	0.5079		0	200	1	39.0388	1	20171101_10.RAW	1350.22
		FALSE	High		Sequest HT (AJ2)	Unambiguous	[R].WLLEGELYNGR.[LV]		4	4	pcri_g8720.t1; pcri_g8718.t1; pcri_g8045.t1; pcri_g8716.t1	pcri_g8720.t1; pcri_g8718.t1; pcri_g8045.t1; pcri_g8716.t1	0	2	MS2	0.5053		0	200	1	47.7365	1	20171101_04.RAW	1350.4
		FALSE	High		Sequest HT (AI2)	Unambiguous	[R].WLLEGELYNGR.[LV]		4	4	pcri_g8720.t1; pcri_g8718.t1; pcri_g8045.t1; pcri_g8716.t1	pcri_g8720.t1; pcri_g8718.t1; pcri_g8045.t1; pcri_g8716.t1	0	2	MS2	0.5172		0	200	1	55.093	1	20171101_05.RAW	1350.69
		FALSE	High		Sequest HT (AG2)	Unambiguous	[R].WLLEGELYNGR.[LV]		4	4	pcri_g8720.t1; pcri_g8718.t1; pcri_g8045.t1; pcri_g8716.t1	pcri_g8720.t1; pcri_g8718.t1; pcri_g8045.t1; pcri_g8716.t1	0	2	MS2	0.4063		0	200	1	54.0326	1	20171101_07.RAW	1351.29
		FALSE	High		Sequest HT (AI2)	Unambiguous	[R].WLLEGELYNGR.[LV]		4	4	pcri_g8720.t1; pcri_g8718.t1; pcri_g8045.t1; pcri_g8716.t1	pcri_g8720.t1; pcri_g8718.t1; pcri_g8045.t1; pcri_g8716.t1	0	2	MS2	0.5251		0	200	1	57.9407	1	20171101_05.RAW	1350.3
		FALSE	High		Sequest HT (AJ2)	Unambiguous	[R].WLLEGELYNGR.[LV]		4	4	pcri_g8720.t1; pcri_g8718.t1; pcri_g8045.t1; pcri_g8716.t1	pcri_g8720.t1; pcri_g8718.t1; pcri_g8045.t1; pcri_g8716.t1	0	2	MS2	0.5805		0	200	1	49.4068	1	20171101_04.RAW	1350.42
		FALSE	High		Sequest HT (AD2)	Unambiguous	[R].WLLEGELYNGR.[LV]		4	4	pcri_g8720.t1; pcri_g8718.t1; pcri_g8045.t1; pcri_g8716.t1	pcri_g8720.t1; pcri_g8718.t1; pcri_g8045.t1; pcri_g8716.t1	0	2	MS2	0.5397		0	200	1	44.5966	1	20171101_10.RAW	1350.36
		FALSE	High		Sequest HT (AD2)	Unambiguous	[R].WLLEGELYNGR.[LV]		4	4	pcri_g8720.t1; pcri_g8718.t1; pcri_g8045.t1; pcri_g8716.t1	pcri_g8720.t1; pcri_g8718.t1; pcri_g8045.t1; pcri_g8716.t1	0	2	MS2	0.5358		0	200	1	45.881	1	20171101_10.RAW	1350.1
		FALSE	High		Sequest HT (AJ2)	Unambiguous	[R].WLLEGELYNGR.[LV]		4	4	pcri_g8720.t1; pcri_g8718.t1; pcri_g8045.t1; pcri_g8716.t1	pcri_g8720.t1; pcri_g8718.t1; pcri_g8045.t1; pcri_g8716.t1	0	2	MS2	0.5252		0	200	1	41.7283	1	20171101_04.RAW	1350.39
		FALSE	High		Sequest HT (AD2)	Unambiguous	[R].WLLEGELYNGR.[LV]		4	4	pcri_g8720.t1; pcri_g8718.t1; pcri_g8045.t1; pcri_g8716.t1	pcri_g8720.t1; pcri_g8718.t1; pcri_g8045.t1; pcri_g8716.t1	0	2	MS2	0.504		0	200	1	40.5439	1	20171101_10.RAW	1350.35
		FALSE	High		Sequest HT (AD2)	Unambiguous	[R].WLLEGELYNGR.[LV]		4	4	pcri_g8720.t1; pcri_g8718.t1; pcri_g8045.t1; pcri_g8716.t1	pcri_g8720.t1; pcri_g8718.t1; pcri_g8045.t1; pcri_g8716.t1	0	2	MS2	0.5305		0	200	1	37.9922	1	20171101_10.RAW	1350.68
		FALSE	High		Sequest HT (AJ2)	Unambiguous	[R].WLLEGELYNGR.[LV]		4	4	pcri_g8720.t1; pcri_g8718.t1; pcri_g8045.t1; pcri_g8716.t1	pcri_g8720.t1; pcri_g8718.t1; pcri_g8045.t1; pcri_g8716.t1	0	2	MS2	0.5213		0	200	1	44.86	1	20171101_04.RAW	1350.62
		FALSE	High		Sequest HT (S2)	Unambiguous	[R].WLLEGELYNGR.[LV]		4	4	pcri_g8720.t1; pcri_g8718.t1; pcri_g8045.t1; pcri_g8716.t1	pcri_g8720.t1; pcri_g8718.t1; pcri_g8045.t1; pcri_g8716.t1	0	2	MS2	0.5559		0	200	1	34.3522	1	20171202_02.RAW	1350.47
		FALSE	High		Sequest HT (AF2)	Unambiguous	[R].WLLEGELYNGR.[LV]		4	4	pcri_g8720.t1; pcri_g8718.t1; pcri_g8045.t1; pcri_g8716.t1	pcri_g8720.t1; pcri_g8718.t1; pcri_g8045.t1; pcri_g8716.t1	0	2	MS2	0.4827		0	200	1	35.0277	1	20171101_08.RAW	1350.71
		FALSE	High		Sequest HT (AL2)	Unambiguous	[R].WLLEGELYNGR.[LV]		4	4	pcri_g8720.t1; pcri_g8718.t1; pcri_g8045.t1; pcri_g8716.t1	pcri_g8720.t1; pcri_g8718.t1; pcri_g8045.t1; pcri_g8716.t1	0	2	MS2	0.4933		0	200	1	49.3603	1	20171101_02.RAW	1350.43
		FALSE	High		Sequest HT (AJ2)	Unambiguous	[R].WLLEGELYNGR.[LV]		4	4	pcri_g8720.t1; pcri_g8718.t1; pcri_g8045.t1; pcri_g8716.t1	pcri_g8720.t1; pcri_g8718.t1; pcri_g8045.t1; pcri_g8716.t1	0	2	MS2	0.52		0	200	1	48.3024	1	20171101_04.RAW	1350.66
		FALSE	High		Sequest HT (S2)	Unambiguous	[R].WLLEGELYNGR.[LV]		4	4	pcri_g8720.t1; pcri_g8718.t1; pcri_g8045.t1; pcri_g8716.t1	pcri_g8720.t1; pcri_g8718.t1; pcri_g8045.t1; pcri_g8716.t1	0	2	MS2	0.5867		0	200	1	31.8761	1	20171202_02.RAW	1349.76
		FALSE	High		Sequest HT (AD2)	Unambiguous	[R].WLLEGELYNGR.[LV]		4	4	pcri_g8720.t1; pcri_g8718.t1; pcri_g8045.t1; pcri_g8716.t1	pcri_g8720.t1; pcri_g8718.t1; pcri_g8045.t1; pcri_g8716.t1	0	2	MS2	0.4773		0	200	1	42.537	1	20171101_10.RAW	1350.56
		FALSE	High		Sequest HT (P2)	Unambiguous	[R].WLLEGELYNGR.[LV]		4	4	pcri_g8720.t1; pcri_g8718.t1; pcri_g8045.t1; pcri_g8716.t1	pcri_g8720.t1; pcri_g8718.t1; pcri_g8045.t1; pcri_g8716.t1	0	2	MS2	0.5228		0	200	1	32.7287	1	20171202_05.RAW	1349.8
		FALSE	High		Sequest HT (AD2)	Unambiguous	[R].WLLEGELYNGR.[LV]		4	4	pcri_g8720.t1; pcri_g8718.t1; pcri_g8045.t1; pcri_g8716.t1	pcri_g8720.t1; pcri_g8718.t1; pcri_g8045.t1; pcri_g8716.t1	0	2	MS2	0.5067		0	200	1	52.9822	1	20171101_10.RAW	1350.57
		FALSE	High		Sequest HT (V2)	Unambiguous	[R].WLLEGELYNGR.[LV]		4	4	pcri_g8720.t1; pcri_g8718.t1; pcri_g8045.t1; pcri_g8716.t1	pcri_g8720.t1; pcri_g8718.t1; pcri_g8045.t1; pcri_g8716.t1	0	2	MS2	0.5469		0	200	1	34.4113	1	20171101_blank08.RAW	1350.27
		FALSE	High		Sequest HT (AD2)	Unambiguous	[R].WLLEGELYNGR.[LV]		4	4	pcri_g8720.t1; pcri_g8718.t1; pcri_g8045.t1; pcri_g8716.t1	pcri_g8720.t1; pcri_g8718.t1; pcri_g8045.t1; pcri_g8716.t1	0	2	MS2	0.5121		0	200	1	46.4383	1	20171101_10.RAW	1350.28
		FALSE	High		Sequest HT (Y2)	Unambiguous	[R].WLLEGELYNGR.[LV]		4	4	pcri_g8720.t1; pcri_g8718.t1; pcri_g8045.t1; pcri_g8716.t1	pcri_g8720.t1; pcri_g8718.t1; pcri_g8045.t1; pcri_g8716.t1	0	2	MS2	0.4826		0	200	1	34.1611	1	20171101_blank05.RAW	1350.48
		FALSE	High		Sequest HT (T2)	Unambiguous	[R].WLLEGELYNGR.[LV]		4	4	pcri_g8720.t1; pcri_g8718.t1; pcri_g8045.t1; pcri_g8716.t1	pcri_g8720.t1; pcri_g8718.t1; pcri_g8045.t1; pcri_g8716.t1	0	2	MS2	0.5469		0	200	1	32.0976	1	20171202_01.RAW	1350.15
		FALSE	High		Sequest HT (AD2)	Unambiguous	[R].WLLEGELYNGR.[LV]		4	4	pcri_g8720.t1; pcri_g8718.t1; pcri_g8045.t1; pcri_g8716.t1	pcri_g8720.t1; pcri_g8718.t1; pcri_g8045.t1; pcri_g8716.t1	0	2	MS2	0.5469		0	200	1	45.2926	1	20171101_10.RAW	1350.55
		FALSE	High		Sequest HT (AJ2)	Unambiguous	[R].WLLEGELYNGR.[LV]		4	4	pcri_g8720.t1; pcri_g8718.t1; pcri_g8045.t1; pcri_g8716.t1	pcri_g8720.t1; pcri_g8718.t1; pcri_g8045.t1; pcri_g8716.t1	0	2	MS2	0.504		0	200	1	48.8502	1	20171101_04.RAW	1349.69
		FALSE	High		Sequest HT (AJ2)	Unambiguous	[R].WLLEGELYNGR.[LV]		4	4	pcri_g8720.t1; pcri_g8718.t1; pcri_g8045.t1; pcri_g8716.t1	pcri_g8720.t1; pcri_g8718.t1; pcri_g8045.t1; pcri_g8716.t1	0	2	MS2	0.4582		0	200	1	39.1736	1	20171101_04.RAW	1350.32
		FALSE	High		Sequest HT (AJ2)	Unambiguous	[R].WLLEGELYNGR.[LV]		4	4	pcri_g8720.t1; pcri_g8718.t1; pcri_g8045.t1; pcri_g8716.t1	pcri_g8720.t1; pcri_g8718.t1; pcri_g8045.t1; pcri_g8716.t1	0	2	MS2	0.566		0	200	1	53.396	1	20171101_04.RAW	1349.69
		FALSE	High		Sequest HT (AD2)	Unambiguous	[R].WLLEGELYNGR.[LV]		4	4	pcri_g8720.t1; pcri_g8718.t1; pcri_g8045.t1; pcri_g8716.t1	pcri_g8720.t1; pcri_g8718.t1; pcri_g8045.t1; pcri_g8716.t1	0	2	MS2	0.5175		0	200	1	52.4108	1	20171101_10.RAW	1350.35
		FALSE	High		Sequest HT (N2)	Unambiguous	[R].WLLEGELYNGR.[LV]		4	4	pcri_g8720.t1; pcri_g8718.t1; pcri_g8045.t1; pcri_g8716.t1	pcri_g8720.t1; pcri_g8718.t1; pcri_g8045.t1; pcri_g8716.t1	0	2	MS2	0.4744		0	200	1	32.6179	1	20171202_07.RAW	1350.44
		FALSE	High		Sequest HT (Q2)	Unambiguous	[R].WLLEGELYNGR.[LV]		4	4	pcri_g8720.t1; pcri_g8718.t1; pcri_g8045.t1; pcri_g8716.t1	pcri_g8720.t1; pcri_g8718.t1; pcri_g8045.t1; pcri_g8716.t1	0	2	MS2	0.4811		0	200	1	37.0128	1	20171202_04.RAW	1349.77
		FALSE	High		Sequest HT (AD2)	Unambiguous	[R].WLLEGELYNGR.[LV]		4	4	pcri_g8720.t1; pcri_g8718.t1; pcri_g8045.t1; pcri_g8716.t1	pcri_g8720.t1; pcri_g8718.t1; pcri_g8045.t1; pcri_g8716.t1	0	2	MS2	0.4905		0	200	1	41.9245	1	20171101_10.RAW	1350.94
		FALSE	High		Sequest HT (AD2)	Unambiguous	[R].WLLEGELYNGR.[LV]		4	4	pcri_g8720.t1; pcri_g8718.t1; pcri_g8045.t1; pcri_g8716.t1	pcri_g8720.t1; pcri_g8718.t1; pcri_g8045.t1; pcri_g8716.t1	0	2	MS2	0.4715		0	200	1	48.1727	1	20171101_10.RAW	1350.57
		FALSE	High		Sequest HT (AM2)	Unambiguous	[R].WLLEGELYNGR.[LV]		4	4	pcri_g8720.t1; pcri_g8718.t1; pcri_g8045.t1; pcri_g8716.t1	pcri_g8720.t1; pcri_g8718.t1; pcri_g8045.t1; pcri_g8716.t1	0	2	MS2	0.4634		0	200	1	35.0446	1	20171101_01.RAW	1351.39
		FALSE	High		Sequest HT (AL2)	Unambiguous	[R].WLLEGELYNGR.[LV]		4	4	pcri_g8720.t1; pcri_g8718.t1; pcri_g8045.t1; pcri_g8716.t1	pcri_g8720.t1; pcri_g8718.t1; pcri_g8045.t1; pcri_g8716.t1	0	2	MS2	0.4661		0	200	1	37.478	1	20171101_02.RAW	1350.77
		FALSE	High		Sequest HT (V2)	Unambiguous	[R].WLLEGELYNGR.[LV]		4	4	pcri_g8720.t1; pcri_g8718.t1; pcri_g8045.t1; pcri_g8716.t1	pcri_g8720.t1; pcri_g8718.t1; pcri_g8045.t1; pcri_g8716.t1	0	2	MS2	0.4824		0	200	1	34.9581	1	20171101_blank08.RAW	1350.99
		FALSE	High		Sequest HT (T2)	Unambiguous	[R].WLLEGELYNGR.[LV]		4	4	pcri_g8720.t1; pcri_g8718.t1; pcri_g8045.t1; pcri_g8716.t1	pcri_g8720.t1; pcri_g8718.t1; pcri_g8045.t1; pcri_g8716.t1	0	2	MS2	0.4864		0	200	1	32.6694	1	20171202_01.RAW	1350.16
		FALSE	High		Sequest HT (AF2)	Unambiguous	[R].WLLEGELYNGR.[LV]		4	4	pcri_g8720.t1; pcri_g8718.t1; pcri_g8045.t1; pcri_g8716.t1	pcri_g8720.t1; pcri_g8718.t1; pcri_g8045.t1; pcri_g8716.t1	0	2	MS2	0.4837		0	200	1	34.4368	1	20171101_08.RAW	1350.22
		FALSE	High		Sequest HT (AI2)	Unambiguous	[R].WLLEGELYNGR.[LV]		4	4	pcri_g8720.t1; pcri_g8718.t1; pcri_g8045.t1; pcri_g8716.t1	pcri_g8720.t1; pcri_g8718.t1; pcri_g8045.t1; pcri_g8716.t1	0	2	MS2	0.4293		0	200	1	49.7834	1	20171101_05.RAW	1350.41
		FALSE	High		Sequest HT (P2)	Unambiguous	[R].WLLEGELYNGR.[LV]		4	4	pcri_g8720.t1; pcri_g8718.t1; pcri_g8045.t1; pcri_g8716.t1	pcri_g8720.t1; pcri_g8718.t1; pcri_g8045.t1; pcri_g8716.t1	0	2	MS2	0.4523		0	200	1	32.2746	1	20171202_05.RAW	1353.3
		FALSE	High		Sequest HT (AJ2)	Unambiguous	[R].WLLEGELYNGR.[LV]		4	4	pcri_g8720.t1; pcri_g8718.t1; pcri_g8045.t1; pcri_g8716.t1	pcri_g8720.t1; pcri_g8718.t1; pcri_g8045.t1; pcri_g8716.t1	0	2	MS2	0.5313		0	200	1	37.0642	1	20171101_04.RAW	1350.38
		FALSE	High		Sequest HT (AJ2)	Unambiguous	[R].WLLEGELYNGR.[LV]		4	4	pcri_g8720.t1; pcri_g8718.t1; pcri_g8045.t1; pcri_g8716.t1	pcri_g8720.t1; pcri_g8718.t1; pcri_g8045.t1; pcri_g8716.t1	0	2	MS2	0.5341		0	200	1	52.8377	1	20171101_04.RAW	1350.32
		FALSE	High		Sequest HT (K2)	Unambiguous	[R].WLLEGELYNGR.[LV]		4	4	pcri_g8720.t1; pcri_g8718.t1; pcri_g8045.t1; pcri_g8716.t1	pcri_g8720.t1; pcri_g8718.t1; pcri_g8045.t1; pcri_g8716.t1	0	2	MS2	0.5273		0	200	1	41.591	1	20171202_10.RAW	1350.69
		FALSE	High		Sequest HT (AI2)	Unambiguous	[R].WLLEGELYNGR.[LV]		4	4	pcri_g8720.t1; pcri_g8718.t1; pcri_g8045.t1; pcri_g8716.t1	pcri_g8720.t1; pcri_g8718.t1; pcri_g8045.t1; pcri_g8716.t1	0	2	MS2	0.5055		0	200	1	50.4684	1	20171101_05.RAW	1351.38
		FALSE	High		Sequest HT (AL2)	Unambiguous	[R].WLLEGELYNGR.[LV]		4	4	pcri_g8720.t1; pcri_g8718.t1; pcri_g8045.t1; pcri_g8716.t1	pcri_g8720.t1; pcri_g8718.t1; pcri_g8045.t1; pcri_g8716.t1	0	2	MS2	0.541		0	200	1	50.6158	1	20171101_02.RAW	1350.33
		FALSE	High		Sequest HT (AG2)	Unambiguous	[R].WLLEGELYNGR.[LV]		4	4	pcri_g8720.t1; pcri_g8718.t1; pcri_g8045.t1; pcri_g8716.t1	pcri_g8720.t1; pcri_g8718.t1; pcri_g8045.t1; pcri_g8716.t1	0	2	MS2	0.4781		0	114.711	1	34.8453	1	20171101_07.RAW	1350.61
		FALSE	High		Sequest HT (AJ2)	Unambiguous	[R].WLLEGELYNGR.[LV]		4	4	pcri_g8720.t1; pcri_g8718.t1; pcri_g8045.t1; pcri_g8716.t1	pcri_g8720.t1; pcri_g8718.t1; pcri_g8045.t1; pcri_g8716.t1	0	2	MS2	0.5644		0	200	1	45.5126	1	20171101_04.RAW	1350.34
		FALSE	High		Sequest HT (Y2)	Unambiguous	[R].WLLEGELYNGR.[LV]		4	4	pcri_g8720.t1; pcri_g8718.t1; pcri_g8045.t1; pcri_g8716.t1	pcri_g8720.t1; pcri_g8718.t1; pcri_g8045.t1; pcri_g8716.t1	0	2	MS2	0.5829		0	200	1	52.1497	1	20171101_blank05.RAW	1350.21
		FALSE	High		Sequest HT (AI2)	Unambiguous	[R].WLLEGELYNGR.[LV]		4	4	pcri_g8720.t1; pcri_g8718.t1; pcri_g8045.t1; pcri_g8716.t1	pcri_g8720.t1; pcri_g8718.t1; pcri_g8045.t1; pcri_g8716.t1	0	2	MS2	0.5319		0	200	1	53.3675	1	20171101_05.RAW	1351.57
		FALSE	High		Sequest HT (AL2)	Unambiguous	[R].WLLEGELYNGR.[LV]		4	4	pcri_g8720.t1; pcri_g8718.t1; pcri_g8045.t1; pcri_g8716.t1	pcri_g8720.t1; pcri_g8718.t1; pcri_g8045.t1; pcri_g8716.t1	0	2	MS2	0.5014		0	200	1	45.7371	1	20171101_02.RAW	1350.51
		FALSE	High		Sequest HT (K2)	Unambiguous	[R].WLLEGELYNGR.[LV]		4	4	pcri_g8720.t1; pcri_g8718.t1; pcri_g8045.t1; pcri_g8716.t1	pcri_g8720.t1; pcri_g8718.t1; pcri_g8045.t1; pcri_g8716.t1	0	2	MS2	0.3482		0	81.273	1	32.272	1	20171202_10.RAW	1353.63
		FALSE	High		Sequest HT (AG2)	Unambiguous	[R].WLLEGELYNGR.[LV]		4	4	pcri_g8720.t1; pcri_g8718.t1; pcri_g8045.t1; pcri_g8716.t1	pcri_g8720.t1; pcri_g8718.t1; pcri_g8045.t1; pcri_g8716.t1	0	2	MS2	0.546		0	200	1	51.1083	1	20171101_07.RAW	1350.59
		FALSE	High		Sequest HT (AG2)	Unambiguous	[R].WLLEGELYNGR.[LV]		4	4	pcri_g8720.t1; pcri_g8718.t1; pcri_g8045.t1; pcri_g8716.t1	pcri_g8720.t1; pcri_g8718.t1; pcri_g8045.t1; pcri_g8716.t1	0	2	MS2	0.4944		0	200	1	59.868	1	20171101_07.RAW	1351
		FALSE	High		Sequest HT (S2)	Unambiguous	[R].WLLEGELYNGR.[LV]		4	4	pcri_g8720.t1; pcri_g8718.t1; pcri_g8045.t1; pcri_g8716.t1	pcri_g8720.t1; pcri_g8718.t1; pcri_g8045.t1; pcri_g8716.t1	0	2	MS2	0.567		0	200	1	33.5843	1	20171202_02.RAW	1350.48
		FALSE	High		Sequest HT (AJ2)	Unambiguous	[R].WLLEGELYNGR.[LV]		4	4	pcri_g8720.t1; pcri_g8718.t1; pcri_g8045.t1; pcri_g8716.t1	pcri_g8720.t1; pcri_g8718.t1; pcri_g8045.t1; pcri_g8716.t1	0	2	MS2	0.5251		0	200	1	52.2161	1	20171101_04.RAW	1350.41
		FALSE	High		Sequest HT (AJ2)	Unambiguous	[R].WLLEGELYNGR.[LV]		4	4	pcri_g8720.t1; pcri_g8718.t1; pcri_g8045.t1; pcri_g8716.t1	pcri_g8720.t1; pcri_g8718.t1; pcri_g8045.t1; pcri_g8716.t1	0	2	MS2	0.5182		0	200	1	55.0383	1	20171101_04.RAW	1350.48
		FALSE	High		Sequest HT (N2)	Unambiguous	[R].WLLEGELYNGR.[LV]		4	4	pcri_g8720.t1; pcri_g8718.t1; pcri_g8045.t1; pcri_g8716.t1	pcri_g8720.t1; pcri_g8718.t1; pcri_g8045.t1; pcri_g8716.t1	0	2	MS2	0.3585		0	200	1	32.0663	1	20171202_07.RAW	1353.46
		FALSE	High		Sequest HT (Y2)	Unambiguous	[R].WLLEGELYNGR.[LV]		4	4	pcri_g8720.t1; pcri_g8718.t1; pcri_g8045.t1; pcri_g8716.t1	pcri_g8720.t1; pcri_g8718.t1; pcri_g8045.t1; pcri_g8716.t1	0	2	MS2	0.4494		0	200	1	49.3232	1	20171101_blank05.RAW	1351.02
		FALSE	High		Sequest HT (AI2)	Unambiguous	[R].WLLEGELYNGR.[LV]		4	4	pcri_g8720.t1; pcri_g8718.t1; pcri_g8045.t1; pcri_g8716.t1	pcri_g8720.t1; pcri_g8718.t1; pcri_g8045.t1; pcri_g8716.t1	0	2	MS2	0.486		0	200	1	46.8873	1	20171101_05.RAW	1351.51
		FALSE	High		Sequest HT (AI2)	Unambiguous	[R].WLLEGELYNGR.[LV]		4	4	pcri_g8720.t1; pcri_g8718.t1; pcri_g8045.t1; pcri_g8716.t1	pcri_g8720.t1; pcri_g8718.t1; pcri_g8045.t1; pcri_g8716.t1	0	2	MS2	0.5424		0	200	1	51.0367	1	20171101_05.RAW	1350.07
		FALSE	High		Sequest HT (AI2)	Unambiguous	[R].WLLEGELYNGR.[LV]		4	4	pcri_g8720.t1; pcri_g8718.t1; pcri_g8045.t1; pcri_g8716.t1	pcri_g8720.t1; pcri_g8718.t1; pcri_g8045.t1; pcri_g8716.t1	0	2	MS2	0.5326		0	200	1	43.897	1	20171101_05.RAW	1350.68
		FALSE	High		Sequest HT (AD2)	Unambiguous	[R].WLLEGELYNGR.[LV]		4	4	pcri_g8720.t1; pcri_g8718.t1; pcri_g8045.t1; pcri_g8716.t1	pcri_g8720.t1; pcri_g8718.t1; pcri_g8045.t1; pcri_g8716.t1	0	2	MS2	0.4972		0	200	1	56.554	1	20171101_10.RAW	1350.49
		FALSE	High		Sequest HT (AI2)	Unambiguous	[R].WLLEGELYNGR.[LV]		4	4	pcri_g8720.t1; pcri_g8718.t1; pcri_g8045.t1; pcri_g8716.t1	pcri_g8720.t1; pcri_g8718.t1; pcri_g8045.t1; pcri_g8716.t1	0	2	MS2	0.49		0	200	1	47.4804	1	20171101_05.RAW	1350.57
		FALSE	High		Sequest HT (Y2)	Unambiguous	[R].WLLEGELYNGR.[LV]		4	4	pcri_g8720.t1; pcri_g8718.t1; pcri_g8045.t1; pcri_g8716.t1	pcri_g8720.t1; pcri_g8718.t1; pcri_g8045.t1; pcri_g8716.t1	0	2	MS2	0.5328		0	200	1	53.6679	1	20171101_blank05.RAW	1351.92
		FALSE	High		Sequest HT (AD2)	Unambiguous	[R].WLLEGELYNGR.[LV]		4	4	pcri_g8720.t1; pcri_g8718.t1; pcri_g8045.t1; pcri_g8716.t1	pcri_g8720.t1; pcri_g8718.t1; pcri_g8045.t1; pcri_g8716.t1	0	2	MS2	0.5086		0	200	1	41.1383	1	20171101_10.RAW	1349.97
		FALSE	High		Sequest HT (AH2)	Unambiguous	[R].WLLEGELYNGR.[LV]		4	4	pcri_g8720.t1; pcri_g8718.t1; pcri_g8045.t1; pcri_g8716.t1	pcri_g8720.t1; pcri_g8718.t1; pcri_g8045.t1; pcri_g8716.t1	0	2	MS2	0.51		0	200	1	34.3568	1	20171101_06.RAW	1350.28
		FALSE	High		Sequest HT (AL2)	Unambiguous	[R].WLLEGELYNGR.[LV]		4	4	pcri_g8720.t1; pcri_g8718.t1; pcri_g8045.t1; pcri_g8716.t1	pcri_g8720.t1; pcri_g8718.t1; pcri_g8045.t1; pcri_g8716.t1	0	2	MS2	0.4613		0	200	1	48.1687	1	20171101_02.RAW	1351.36
		FALSE	High		Sequest HT (AL2)	Unambiguous	[R].WLLEGELYNGR.[LV]		4	4	pcri_g8720.t1; pcri_g8718.t1; pcri_g8045.t1; pcri_g8716.t1	pcri_g8720.t1; pcri_g8718.t1; pcri_g8045.t1; pcri_g8716.t1	0	2	MS2	0.4682		0	200	1	44.252	1	20171101_02.RAW	1350.78
		FALSE	High		Sequest HT (AL2)	Unambiguous	[R].WLLEGELYNGR.[LV]		4	4	pcri_g8720.t1; pcri_g8718.t1; pcri_g8045.t1; pcri_g8716.t1	pcri_g8720.t1; pcri_g8718.t1; pcri_g8045.t1; pcri_g8716.t1	0	2	MS2	0.5159		0	200	1	58.5245	1	20171101_02.RAW	1350.58
		FALSE	High		Sequest HT (T2)	Unambiguous	[R].WLLEGELYNGR.[LV]		4	4	pcri_g8720.t1; pcri_g8718.t1; pcri_g8045.t1; pcri_g8716.t1	pcri_g8720.t1; pcri_g8718.t1; pcri_g8045.t1; pcri_g8716.t1	0	2	MS2	0.3681		0	200	1	32.2705	1	20171202_01.RAW	1353.33
		FALSE	High		Sequest HT (AA2)	Unambiguous	[R].WLLEGELYNGR.[LV]		4	4	pcri_g8720.t1; pcri_g8718.t1; pcri_g8045.t1; pcri_g8716.t1	pcri_g8720.t1; pcri_g8718.t1; pcri_g8045.t1; pcri_g8716.t1	0	2	MS2	0.4315		0	200	1	34.2053	1	20171101_blank03.RAW	1350.63
		FALSE	High		Sequest HT (AI2)	Unambiguous	[R].WLLEGELYNGR.[LV]		4	4	pcri_g8720.t1; pcri_g8718.t1; pcri_g8045.t1; pcri_g8716.t1	pcri_g8720.t1; pcri_g8718.t1; pcri_g8045.t1; pcri_g8716.t1	0	2	MS2	0.5409		0	200	1	37.7874	1	20171101_05.RAW	1350.4
		FALSE	High		Sequest HT (AJ2)	Unambiguous	[R].WLLEGELYNGR.[LV]		4	4	pcri_g8720.t1; pcri_g8718.t1; pcri_g8045.t1; pcri_g8716.t1	pcri_g8720.t1; pcri_g8718.t1; pcri_g8045.t1; pcri_g8716.t1	0	2	MS2	0.5263		0	200	1	38.4521	1	20171101_04.RAW	1350.06
		FALSE	High		Sequest HT (AI2)	Unambiguous	[R].WLLEGELYNGR.[LV]		4	4	pcri_g8720.t1; pcri_g8718.t1; pcri_g8045.t1; pcri_g8716.t1	pcri_g8720.t1; pcri_g8718.t1; pcri_g8045.t1; pcri_g8716.t1	0	2	MS2	0.4897		0	200	1	57.3494	1	20171101_05.RAW	1350.61
		FALSE	High		Sequest HT (AD2)	Unambiguous	[R].WLLEGELYNGR.[LV]		4	4	pcri_g8720.t1; pcri_g8718.t1; pcri_g8045.t1; pcri_g8716.t1	pcri_g8720.t1; pcri_g8718.t1; pcri_g8045.t1; pcri_g8716.t1	0	2	MS2	0.4721		0	200	1	53.5364	1	20171101_10.RAW	1350.55
		FALSE	High		Sequest HT (AL2)	Unambiguous	[R].WLLEGELYNGR.[LV]		4	4	pcri_g8720.t1; pcri_g8718.t1; pcri_g8045.t1; pcri_g8716.t1	pcri_g8720.t1; pcri_g8718.t1; pcri_g8045.t1; pcri_g8716.t1	0	2	MS2	0.5601		0	200	1	46.4586	1	20171101_02.RAW	1350.25
		FALSE	High		Sequest HT (AJ2)	Unambiguous	[R].WLLEGELYNGR.[LV]		4	4	pcri_g8720.t1; pcri_g8718.t1; pcri_g8045.t1; pcri_g8716.t1	pcri_g8720.t1; pcri_g8718.t1; pcri_g8045.t1; pcri_g8716.t1	0	2	MS2	0.5455		0	200	1	35.8544	1	20171101_04.RAW	1349.8
		FALSE	High		Sequest HT (AL2)	Unambiguous	[R].WLLEGELYNGR.[LV]		4	4	pcri_g8720.t1; pcri_g8718.t1; pcri_g8045.t1; pcri_g8716.t1	pcri_g8720.t1; pcri_g8718.t1; pcri_g8045.t1; pcri_g8716.t1	0	2	MS2	0.5634		0	200	1	57.3633	1	20171101_02.RAW	1350.11
		FALSE	High		Sequest HT (AI2)	Unambiguous	[R].WLLEGELYNGR.[LV]		4	4	pcri_g8720.t1; pcri_g8718.t1; pcri_g8045.t1; pcri_g8716.t1	pcri_g8720.t1; pcri_g8718.t1; pcri_g8045.t1; pcri_g8716.t1	0	2	MS2	0.5207		0	200	1	48.6388	1	20171101_05.RAW	1350.28
		FALSE	High		Sequest HT (AL2)	Unambiguous	[R].WLLEGELYNGR.[LV]		4	4	pcri_g8720.t1; pcri_g8718.t1; pcri_g8045.t1; pcri_g8716.t1	pcri_g8720.t1; pcri_g8718.t1; pcri_g8045.t1; pcri_g8716.t1	0	2	MS2	0.5118		0	200	1	59.2775	1	20171101_02.RAW	1350.16
		FALSE	High		Sequest HT (AI2)	Unambiguous	[R].WLLEGELYNGR.[LV]		4	4	pcri_g8720.t1; pcri_g8718.t1; pcri_g8045.t1; pcri_g8716.t1	pcri_g8720.t1; pcri_g8718.t1; pcri_g8045.t1; pcri_g8716.t1	0	2	MS2	0.4645		0	200	1	39.3511	1	20171101_05.RAW	1350.58
		FALSE	High		Sequest HT (AD2)	Unambiguous	[R].WLLEGELYNGR.[LV]		4	4	pcri_g8720.t1; pcri_g8718.t1; pcri_g8045.t1; pcri_g8716.t1	pcri_g8720.t1; pcri_g8718.t1; pcri_g8045.t1; pcri_g8716.t1	0	2	MS2	0.5193		0	200	1	49.8984	1	20171101_10.RAW	1350.22
		FALSE	High		Sequest HT (K2)	Unambiguous	[R].WLLEGELYNGR.[LV]		4	4	pcri_g8720.t1; pcri_g8718.t1; pcri_g8045.t1; pcri_g8716.t1	pcri_g8720.t1; pcri_g8718.t1; pcri_g8045.t1; pcri_g8716.t1	0	2	MS2	0.5519		0	200	1	57.9671	1	20171202_10.RAW	1351.73
		FALSE	High		Sequest HT (X2)	Unambiguous	[R].WLLEGELYNGR.[LV]		4	4	pcri_g8720.t1; pcri_g8718.t1; pcri_g8045.t1; pcri_g8716.t1	pcri_g8720.t1; pcri_g8718.t1; pcri_g8045.t1; pcri_g8716.t1	0	2	MS2	0.4718		0	200	1	34.4587	1	20171101_blank06.RAW	1350.48
		FALSE	High		Sequest HT (AJ2)	Unambiguous	[R].WLLEGELYNGR.[LV]		4	4	pcri_g8720.t1; pcri_g8718.t1; pcri_g8045.t1; pcri_g8716.t1	pcri_g8720.t1; pcri_g8718.t1; pcri_g8045.t1; pcri_g8716.t1	0	2	MS2	0.3798		0	200	1	56.697	1	20171101_04.RAW	1350.77
		FALSE	High		Sequest HT (AL2)	Unambiguous	[R].WLLEGELYNGR.[LV]		4	4	pcri_g8720.t1; pcri_g8718.t1; pcri_g8045.t1; pcri_g8716.t1	pcri_g8720.t1; pcri_g8718.t1; pcri_g8045.t1; pcri_g8716.t1	0	2	MS2	0.5433		0	200	1	51.1841	1	20171101_02.RAW	1350.55
		FALSE	High		Sequest HT (Y2)	Unambiguous	[R].WLLEGELYNGR.[LV]		4	4	pcri_g8720.t1; pcri_g8718.t1; pcri_g8045.t1; pcri_g8716.t1	pcri_g8720.t1; pcri_g8718.t1; pcri_g8045.t1; pcri_g8716.t1	0	2	MS2	0.4388		0	200	1	52.7075	1	20171101_blank05.RAW	1350.52
		FALSE	High		Sequest HT (AI2)	Unambiguous	[R].WLLEGELYNGR.[LV]		4	4	pcri_g8720.t1; pcri_g8718.t1; pcri_g8045.t1; pcri_g8716.t1	pcri_g8720.t1; pcri_g8718.t1; pcri_g8045.t1; pcri_g8716.t1	0	2	MS2	0.503		0	200	1	43.1652	1	20171101_05.RAW	1350.32
		FALSE	High		Sequest HT (AI2)	Unambiguous	[R].WLLEGELYNGR.[LV]		4	4	pcri_g8720.t1; pcri_g8718.t1; pcri_g8045.t1; pcri_g8716.t1	pcri_g8720.t1; pcri_g8718.t1; pcri_g8045.t1; pcri_g8716.t1	0	2	MS2	0.491		0	200	1	55.6527	1	20171101_05.RAW	1350.26
		FALSE	High		Sequest HT (AJ2)	Unambiguous	[R].WLLEGELYNGR.[LV]		4	4	pcri_g8720.t1; pcri_g8718.t1; pcri_g8045.t1; pcri_g8716.t1	pcri_g8720.t1; pcri_g8718.t1; pcri_g8045.t1; pcri_g8716.t1	0	2	MS2	0.4127		0	200	1	56.1474	1	20171101_04.RAW	1351.33
		FALSE	High		Sequest HT (AL2)	Unambiguous	[R].WLLEGELYNGR.[LV]		4	4	pcri_g8720.t1; pcri_g8718.t1; pcri_g8045.t1; pcri_g8716.t1	pcri_g8720.t1; pcri_g8718.t1; pcri_g8045.t1; pcri_g8716.t1	0	2	MS2	0.497		0	200	1	57.9659	1	20171101_02.RAW	1350.24
		FALSE	High		Sequest HT (AL2)	Unambiguous	[R].WLLEGELYNGR.[LV]		4	4	pcri_g8720.t1; pcri_g8718.t1; pcri_g8045.t1; pcri_g8716.t1	pcri_g8720.t1; pcri_g8718.t1; pcri_g8045.t1; pcri_g8716.t1	0	2	MS2	0.4036		0	200	1	48.7211	1	20171101_02.RAW	1351.14
		FALSE	High		Sequest HT (AL2)	Unambiguous	[R].WLLEGELYNGR.[LV]		4	4	pcri_g8720.t1; pcri_g8718.t1; pcri_g8045.t1; pcri_g8716.t1	pcri_g8720.t1; pcri_g8718.t1; pcri_g8045.t1; pcri_g8716.t1	0	2	MS2	0.4048		0	200	1	52.4687	1	20171101_02.RAW	1350.69
		FALSE	High		Sequest HT (AJ2)	Unambiguous	[R].WLLEGELYNGR.[LV]		4	4	pcri_g8720.t1; pcri_g8718.t1; pcri_g8045.t1; pcri_g8716.t1	pcri_g8720.t1; pcri_g8718.t1; pcri_g8045.t1; pcri_g8716.t1	0	2	MS2	0.4894		0	200	1	54.4902	1	20171101_04.RAW	1350.48
		FALSE	High		Sequest HT (AF2)	Unambiguous	[R].WLLEGELYNGR.[LV]		4	4	pcri_g8720.t1; pcri_g8718.t1; pcri_g8045.t1; pcri_g8716.t1	pcri_g8720.t1; pcri_g8718.t1; pcri_g8045.t1; pcri_g8716.t1	0	2	MS2	0.4772		0	200	1	59.0513	1	20171101_08.RAW	1351.42
		FALSE	High		Sequest HT (AL2)	Unambiguous	[R].WLLEGELYNGR.[LV]		4	4	pcri_g8720.t1; pcri_g8718.t1; pcri_g8045.t1; pcri_g8716.t1	pcri_g8720.t1; pcri_g8718.t1; pcri_g8045.t1; pcri_g8716.t1	0	2	MS2	0.5106		0	200	1	44.9587	1	20171101_02.RAW	1350
		FALSE	High		Sequest HT (AI2)	Unambiguous	[R].WLLEGELYNGR.[LV]		4	4	pcri_g8720.t1; pcri_g8718.t1; pcri_g8045.t1; pcri_g8716.t1	pcri_g8720.t1; pcri_g8718.t1; pcri_g8045.t1; pcri_g8716.t1	0	2	MS2	0.5653		0	200	1	48.076	1	20171101_05.RAW	1349.86
		FALSE	High		Sequest HT (AI2)	Unambiguous	[R].WLLEGELYNGR.[LV]		4	4	pcri_g8720.t1; pcri_g8718.t1; pcri_g8045.t1; pcri_g8716.t1	pcri_g8720.t1; pcri_g8718.t1; pcri_g8045.t1; pcri_g8716.t1	0	2	MS2	0.5745		0	200	1	51.5892	1	20171101_05.RAW	1349.92
		FALSE	High		Sequest HT (AF2)	Unambiguous	[R].WLLEGELYNGR.[LV]		4	4	pcri_g8720.t1; pcri_g8718.t1; pcri_g8045.t1; pcri_g8716.t1	pcri_g8720.t1; pcri_g8718.t1; pcri_g8045.t1; pcri_g8716.t1	0	2	MS2	0.465		0	200	1	57.5083	1	20171101_08.RAW	1349.92
		FALSE	High		Sequest HT (Y2)	Unambiguous	[R].WLLEGELYNGR.[LV]		4	4	pcri_g8720.t1; pcri_g8718.t1; pcri_g8045.t1; pcri_g8716.t1	pcri_g8720.t1; pcri_g8718.t1; pcri_g8045.t1; pcri_g8716.t1	0	2	MS2	0.5732		0	200	1	42.7013	1	20171101_blank05.RAW	1350.76
		FALSE	High		Sequest HT (AM2)	Unambiguous	[R].WLLEGELYNGR.[LV]		4	4	pcri_g8720.t1; pcri_g8718.t1; pcri_g8045.t1; pcri_g8716.t1	pcri_g8720.t1; pcri_g8718.t1; pcri_g8045.t1; pcri_g8716.t1	0	2	MS2	0.5549		0	200	1	52.3152	1	20171101_01.RAW	1350.48
		FALSE	High		Sequest HT (AJ2)	Unambiguous	[R].WLLEGELYNGR.[LV]		4	4	pcri_g8720.t1; pcri_g8718.t1; pcri_g8045.t1; pcri_g8716.t1	pcri_g8720.t1; pcri_g8718.t1; pcri_g8045.t1; pcri_g8716.t1	0	2	MS2	0.5535		0	200	1	42.899	1	20171101_04.RAW	1349.87
		FALSE	High		Sequest HT (AF2)	Unambiguous	[R].WLLEGELYNGR.[LV]		4	4	pcri_g8720.t1; pcri_g8718.t1; pcri_g8045.t1; pcri_g8716.t1	pcri_g8720.t1; pcri_g8718.t1; pcri_g8045.t1; pcri_g8716.t1	0	2	MS2	0.4202		0	200	1	56.851	1	20171101_08.RAW	1352.11
		FALSE	High		Sequest HT (AI2)	Unambiguous	[R].WLLEGELYNGR.[LV]		4	4	pcri_g8720.t1; pcri_g8718.t1; pcri_g8045.t1; pcri_g8716.t1	pcri_g8720.t1; pcri_g8718.t1; pcri_g8045.t1; pcri_g8716.t1	0	2	MS2	0.3098		0	200	1	34.1509	1	20171101_05.RAW	1353.62
		FALSE	High		Sequest HT (AB2)	Unambiguous	[R].WLLEGELYNGR.[LV]		4	4	pcri_g8720.t1; pcri_g8718.t1; pcri_g8045.t1; pcri_g8716.t1	pcri_g8720.t1; pcri_g8718.t1; pcri_g8045.t1; pcri_g8716.t1	0	2	MS2	0.5463		0	200	1	34.5186	1	20171101_blank02.RAW	1349.72
		FALSE	High		Sequest HT (AI2)	Unambiguous	[R].WLLEGELYNGR.[LV]		4	4	pcri_g8720.t1; pcri_g8718.t1; pcri_g8045.t1; pcri_g8716.t1	pcri_g8720.t1; pcri_g8718.t1; pcri_g8045.t1; pcri_g8716.t1	0	2	MS2	0.5216		0	200	1	59.1672	1	20171101_05.RAW	1350.49
		FALSE	High		Sequest HT (AI2)	Unambiguous	[R].WLLEGELYNGR.[LV]		4	4	pcri_g8720.t1; pcri_g8718.t1; pcri_g8045.t1; pcri_g8716.t1	pcri_g8720.t1; pcri_g8718.t1; pcri_g8045.t1; pcri_g8716.t1	0	2	MS2	0.534		0	200	1	34.0752	1	20171101_05.RAW	1349.53
		FALSE	High		Sequest HT (Y2)	Unambiguous	[R].WLLEGELYNGR.[LV]		4	4	pcri_g8720.t1; pcri_g8718.t1; pcri_g8045.t1; pcri_g8716.t1	pcri_g8720.t1; pcri_g8718.t1; pcri_g8045.t1; pcri_g8716.t1	0	2	MS2	0.5108		0	200	1	35.3204	1	20171101_blank05.RAW	1350.78
		FALSE	High		Sequest HT (AD2)	Unambiguous	[R].WLLEGELYNGR.[LV]		4	4	pcri_g8720.t1; pcri_g8718.t1; pcri_g8045.t1; pcri_g8716.t1	pcri_g8720.t1; pcri_g8718.t1; pcri_g8045.t1; pcri_g8716.t1	0	2	MS2	0.5759		0	200	1	57.1068	1	20171101_10.RAW	1349.59
		FALSE	High		Sequest HT (AI2)	Unambiguous	[R].WLLEGELYNGR.[LV]		4	4	pcri_g8720.t1; pcri_g8718.t1; pcri_g8045.t1; pcri_g8716.t1	pcri_g8720.t1; pcri_g8718.t1; pcri_g8045.t1; pcri_g8716.t1	0	2	MS2	0.4534		0	200	1	52.2228	1	20171101_05.RAW	1350.82
		FALSE	High		Sequest HT (AI2)	Unambiguous	[R].WLLEGELYNGR.[LV]		4	4	pcri_g8720.t1; pcri_g8718.t1; pcri_g8045.t1; pcri_g8716.t1	pcri_g8720.t1; pcri_g8718.t1; pcri_g8045.t1; pcri_g8716.t1	0	2	MS2	0.5248		0	200	1	53.9521	1	20171101_05.RAW	1349.43
		FALSE	High		Sequest HT (V2)	Unambiguous	[R].WLLEGELYNGR.[LV]		4	4	pcri_g8720.t1; pcri_g8718.t1; pcri_g8045.t1; pcri_g8716.t1	pcri_g8720.t1; pcri_g8718.t1; pcri_g8045.t1; pcri_g8716.t1	0	2	MS2	0.4611		0	200	1	50.6745	1	20171101_blank08.RAW	1350.36
		FALSE	High		Sequest HT (AL2)	Unambiguous	[R].WLLEGELYNGR.[LV]		4	4	pcri_g8720.t1; pcri_g8718.t1; pcri_g8045.t1; pcri_g8716.t1	pcri_g8720.t1; pcri_g8718.t1; pcri_g8045.t1; pcri_g8716.t1	0	2	MS2	0.5358		0	200	1	53.1406	1	20171101_02.RAW	1349.76
		FALSE	High		Sequest HT (AJ2)	Unambiguous	[R].WLLEGELYNGR.[LV]		4	4	pcri_g8720.t1; pcri_g8718.t1; pcri_g8045.t1; pcri_g8716.t1	pcri_g8720.t1; pcri_g8718.t1; pcri_g8045.t1; pcri_g8716.t1	0	2	MS2	0.4151		0	200	1	50.5172	1	20171101_04.RAW	1352.42
		FALSE	High		Sequest HT (Y2)	Unambiguous	[R].WLLEGELYNGR.[LV]		4	4	pcri_g8720.t1; pcri_g8718.t1; pcri_g8045.t1; pcri_g8716.t1	pcri_g8720.t1; pcri_g8718.t1; pcri_g8045.t1; pcri_g8716.t1	0	2	MS2	0.5047		0	200	1	55.1593	1	20171101_blank05.RAW	1350.52
		FALSE	High		Sequest HT (AL2)	Unambiguous	[R].WLLEGELYNGR.[LV]		4	4	pcri_g8720.t1; pcri_g8718.t1; pcri_g8045.t1; pcri_g8716.t1	pcri_g8720.t1; pcri_g8718.t1; pcri_g8045.t1; pcri_g8716.t1	0	2	MS2	0.5047		0	200	1	40.2524	1	20171101_02.RAW	1350.37
		FALSE	High		Sequest HT (AI2)	Unambiguous	[R].WLLEGELYNGR.[LV]		4	4	pcri_g8720.t1; pcri_g8718.t1; pcri_g8045.t1; pcri_g8716.t1	pcri_g8720.t1; pcri_g8718.t1; pcri_g8045.t1; pcri_g8716.t1	0	2	MS2	0.3956		0	200	1	54.5442	1	20171101_05.RAW	1351.32
		FALSE	High		Sequest HT (Y2)	Unambiguous	[R].WLLEGELYNGR.[LV]		4	4	pcri_g8720.t1; pcri_g8718.t1; pcri_g8045.t1; pcri_g8716.t1	pcri_g8720.t1; pcri_g8718.t1; pcri_g8045.t1; pcri_g8716.t1	0	2	MS2	0.519		0	200	1	51.4542	1	20171101_blank05.RAW	1350.31
		FALSE	High		Sequest HT (AI2)	Unambiguous	[R].WLLEGELYNGR.[LV]		4	4	pcri_g8720.t1; pcri_g8718.t1; pcri_g8045.t1; pcri_g8716.t1	pcri_g8720.t1; pcri_g8718.t1; pcri_g8045.t1; pcri_g8716.t1	0	2	MS2	0.5079		0	200	1	56.798	1	20171101_05.RAW	1349.86
		FALSE	High		Sequest HT (AM2)	Unambiguous	[R].WLLEGELYNGR.[LV]		4	4	pcri_g8720.t1; pcri_g8718.t1; pcri_g8045.t1; pcri_g8716.t1	pcri_g8720.t1; pcri_g8718.t1; pcri_g8045.t1; pcri_g8716.t1	0	2	MS2	0.465		0	200	1	59.3879	1	20171101_01.RAW	1350.77
		FALSE	High		Sequest HT (AI2)	Unambiguous	[R].WLLEGELYNGR.[LV]		4	4	pcri_g8720.t1; pcri_g8718.t1; pcri_g8045.t1; pcri_g8716.t1	pcri_g8720.t1; pcri_g8718.t1; pcri_g8045.t1; pcri_g8716.t1	0	2	MS2	0.5911		0	200	1	40.9799	1	20171101_05.RAW	1350.08
		FALSE	High		Sequest HT (AI2)	Unambiguous	[R].WLLEGELYNGR.[LV]		4	4	pcri_g8720.t1; pcri_g8718.t1; pcri_g8045.t1; pcri_g8716.t1	pcri_g8720.t1; pcri_g8718.t1; pcri_g8045.t1; pcri_g8716.t1	0	2	MS2	0.4231		0	200	1	49.2368	1	20171101_05.RAW	1349.96
		FALSE	High		Sequest HT (AL2)	Unambiguous	[R].WLLEGELYNGR.[LV]		4	4	pcri_g8720.t1; pcri_g8718.t1; pcri_g8045.t1; pcri_g8716.t1	pcri_g8720.t1; pcri_g8718.t1; pcri_g8045.t1; pcri_g8716.t1	0	2	MS2	0.4968		0	200	1	53.7656	1	20171101_02.RAW	1350.27
		FALSE	High		Sequest HT (M2)	Unambiguous	[R].WLLEGELYNGR.[LV]		4	4	pcri_g8720.t1; pcri_g8718.t1; pcri_g8045.t1; pcri_g8716.t1	pcri_g8720.t1; pcri_g8718.t1; pcri_g8045.t1; pcri_g8716.t1	0	2	MS2	0.4194		0	200	1	32.8844	1	20171202_08.RAW	1351.26
		FALSE	High		Sequest HT (AF2)	Unambiguous	[R].WLLEGELYNGR.[LV]		4	4	pcri_g8720.t1; pcri_g8718.t1; pcri_g8045.t1; pcri_g8716.t1	pcri_g8720.t1; pcri_g8718.t1; pcri_g8045.t1; pcri_g8716.t1	0	2	MS2	0.3871		0	200	1	50.9513	1	20171101_08.RAW	1351.45
		FALSE	High		Sequest HT (AI2)	Unambiguous	[R].WLLEGELYNGR.[LV]		4	4	pcri_g8720.t1; pcri_g8718.t1; pcri_g8045.t1; pcri_g8716.t1	pcri_g8720.t1; pcri_g8718.t1; pcri_g8045.t1; pcri_g8716.t1	0	2	MS2	0.5097		0	200	1	40.2575	1	20171101_05.RAW	1349.66
		FALSE	High		Sequest HT (P2)	Unambiguous	[R].WLLEGELYNGR.[LV]		4	4	pcri_g8720.t1; pcri_g8718.t1; pcri_g8045.t1; pcri_g8716.t1	pcri_g8720.t1; pcri_g8718.t1; pcri_g8045.t1; pcri_g8716.t1	0	2	MS2	0.3824		0	200	1	62.805	1	20171202_05.RAW	1351.35
		FALSE	High		Sequest HT (AF2)	Unambiguous	[R].WLLEGELYNGR.[LV]		4	4	pcri_g8720.t1; pcri_g8718.t1; pcri_g8045.t1; pcri_g8716.t1	pcri_g8720.t1; pcri_g8718.t1; pcri_g8045.t1; pcri_g8716.t1	0	2	MS2	0.5784		0	200	1	58.451	1	20171101_08.RAW	1350.35
		FALSE	High		Sequest HT (Y2)	Unambiguous	[R].WLLEGELYNGR.[LV]		4	4	pcri_g8720.t1; pcri_g8718.t1; pcri_g8045.t1; pcri_g8716.t1	pcri_g8720.t1; pcri_g8718.t1; pcri_g8045.t1; pcri_g8716.t1	0	2	MS2	0.5344		0	200	1	47.3823	1	20171101_blank05.RAW	1350.63
		FALSE	High		Sequest HT (AL2)	Unambiguous	[R].WLLEGELYNGR.[LV]		4	4	pcri_g8720.t1; pcri_g8718.t1; pcri_g8045.t1; pcri_g8716.t1	pcri_g8720.t1; pcri_g8718.t1; pcri_g8045.t1; pcri_g8716.t1	0	2	MS2	0.5428		0	200	1	50.0598	1	20171101_02.RAW	1350.49
		FALSE	High		Sequest HT (Y2)	Unambiguous	[R].WLLEGELYNGR.[LV]		4	4	pcri_g8720.t1; pcri_g8718.t1; pcri_g8045.t1; pcri_g8716.t1	pcri_g8720.t1; pcri_g8718.t1; pcri_g8045.t1; pcri_g8716.t1	0	2	MS2	0.5083		0	200	1	48.5916	1	20171101_blank05.RAW	1350.82
		FALSE	High		Sequest HT (AL2)	Unambiguous	[R].WLLEGELYNGR.[LV]		4	4	pcri_g8720.t1; pcri_g8718.t1; pcri_g8045.t1; pcri_g8716.t1	pcri_g8720.t1; pcri_g8718.t1; pcri_g8045.t1; pcri_g8716.t1	0	2	MS2	0.2591		0	200	1	34.1329	1	20171101_02.RAW	1353.53
		FALSE	High		Sequest HT (P2)	Unambiguous	[R].WLLEGELYNGR.[LV]		4	4	pcri_g8720.t1; pcri_g8718.t1; pcri_g8045.t1; pcri_g8716.t1	pcri_g8720.t1; pcri_g8718.t1; pcri_g8045.t1; pcri_g8716.t1	0	2	MS2	0.3654		0	200	1	53.2628	1	20171202_05.RAW	1350.62
		FALSE	High		Sequest HT (Y2)	Unambiguous	[R].WLLEGELYNGR.[LV]		4	4	pcri_g8720.t1; pcri_g8718.t1; pcri_g8045.t1; pcri_g8716.t1	pcri_g8720.t1; pcri_g8718.t1; pcri_g8045.t1; pcri_g8716.t1	0	2	MS2	0.5724		0	200	1	50.5789	1	20171101_blank05.RAW	1350.26
		FALSE	High		Sequest HT (Q2)	Unambiguous	[R].WLLEGELYNGR.[LV]		4	4	pcri_g8720.t1; pcri_g8718.t1; pcri_g8045.t1; pcri_g8716.t1	pcri_g8720.t1; pcri_g8718.t1; pcri_g8045.t1; pcri_g8716.t1	0	1	MS2	0.4358		0	197.826	1	32.2713	1	20171202_04.RAW	1350.78
		FALSE	High		Sequest HT (AK2)	Unambiguous	[R].WLLEGELYNGR.[LV]		4	4	pcri_g8720.t1; pcri_g8718.t1; pcri_g8045.t1; pcri_g8716.t1	pcri_g8720.t1; pcri_g8718.t1; pcri_g8045.t1; pcri_g8716.t1	0	2	MS2	0.4628		0	200	1	49.6388	1	20171101_03.RAW	1350.8
		FALSE	High		Sequest HT (AF2)	Unambiguous	[R].WLLEGELYNGR.[LV]		4	4	pcri_g8720.t1; pcri_g8718.t1; pcri_g8045.t1; pcri_g8716.t1	pcri_g8720.t1; pcri_g8718.t1; pcri_g8045.t1; pcri_g8716.t1	0	2	MS2	0.522		0	200	1	44.4962	1	20171101_08.RAW	1351.07
		FALSE	High		Sequest HT (Y2)	Unambiguous	[R].WLLEGELYNGR.[LV]		4	4	pcri_g8720.t1; pcri_g8718.t1; pcri_g8045.t1; pcri_g8716.t1	pcri_g8720.t1; pcri_g8718.t1; pcri_g8045.t1; pcri_g8716.t1	0	2	MS2	0.5612		0	200	1	42.053	1	20171101_blank05.RAW	1350.23
		FALSE	High		Sequest HT (P2)	Unambiguous	[R].WLLEGELYNGR.[LV]		4	4	pcri_g8720.t1; pcri_g8718.t1; pcri_g8045.t1; pcri_g8716.t1	pcri_g8720.t1; pcri_g8718.t1; pcri_g8045.t1; pcri_g8716.t1	0	2	MS2	0.4642		0	200	1	52.328	1	20171202_05.RAW	1349.67
		FALSE	High		Sequest HT (P2)	Unambiguous	[R].WLLEGELYNGR.[LV]		4	4	pcri_g8720.t1; pcri_g8718.t1; pcri_g8045.t1; pcri_g8716.t1	pcri_g8720.t1; pcri_g8718.t1; pcri_g8045.t1; pcri_g8716.t1	0	2	MS2	0.476		0	200	1	60.6425	1	20171202_05.RAW	1350.01
		FALSE	High		Sequest HT (AF2)	Unambiguous	[R].WLLEGELYNGR.[LV]		4	4	pcri_g8720.t1; pcri_g8718.t1; pcri_g8045.t1; pcri_g8716.t1	pcri_g8720.t1; pcri_g8718.t1; pcri_g8045.t1; pcri_g8716.t1	0	2	MS2	0.3655		0	200	1	53.8794	1	20171101_08.RAW	1351.77
		FALSE	High		Sequest HT (Y2)	Unambiguous	[R].WLLEGELYNGR.[LV]		4	4	pcri_g8720.t1; pcri_g8718.t1; pcri_g8045.t1; pcri_g8716.t1	pcri_g8720.t1; pcri_g8718.t1; pcri_g8045.t1; pcri_g8716.t1	0	2	MS2	0.4637		0	200	1	49.9783	1	20171101_blank05.RAW	1350.71
		FALSE	High		Sequest HT (AF2)	Unambiguous	[R].WLLEGELYNGR.[LV]		4	4	pcri_g8720.t1; pcri_g8718.t1; pcri_g8045.t1; pcri_g8716.t1	pcri_g8720.t1; pcri_g8718.t1; pcri_g8045.t1; pcri_g8716.t1	0	2	MS2	0.4301		0	200	1	49.9231	1	20171101_08.RAW	1350.58
		FALSE	High		Sequest HT (AF2)	Unambiguous	[R].WLLEGELYNGR.[LV]		4	4	pcri_g8720.t1; pcri_g8718.t1; pcri_g8045.t1; pcri_g8716.t1	pcri_g8720.t1; pcri_g8718.t1; pcri_g8045.t1; pcri_g8716.t1	0	2	MS2	0.3776		0	200	1	36.9338	1	20171101_08.RAW	1350.92
		FALSE	High		Sequest HT (V2)	Unambiguous	[R].WLLEGELYNGR.[LV]		4	4	pcri_g8720.t1; pcri_g8718.t1; pcri_g8045.t1; pcri_g8716.t1	pcri_g8720.t1; pcri_g8718.t1; pcri_g8045.t1; pcri_g8716.t1	0	2	MS2	0.4947		0	200	1	55.3139	1	20171101_blank08.RAW	1350.57
		FALSE	High		Sequest HT (K2)	Unambiguous	[R].WLLEGELYNGR.[LV]		4	4	pcri_g8720.t1; pcri_g8718.t1; pcri_g8045.t1; pcri_g8716.t1	pcri_g8720.t1; pcri_g8718.t1; pcri_g8045.t1; pcri_g8716.t1	0	1	MS2	0.4498		0	200	1	32.3667	1	20171202_10.RAW	1350.76
		FALSE	High		Sequest HT (V2)	Unambiguous	[R].WLLEGELYNGR.[LV]		4	4	pcri_g8720.t1; pcri_g8718.t1; pcri_g8045.t1; pcri_g8716.t1	pcri_g8720.t1; pcri_g8718.t1; pcri_g8045.t1; pcri_g8716.t1	0	2	MS2	0.4275		0	200	1	52.7753	1	20171101_blank08.RAW	1350.2
		FALSE	High		Sequest HT (Z2)	Unambiguous	[R].WLLEGELYNGR.[LV]		4	4	pcri_g8720.t1; pcri_g8718.t1; pcri_g8045.t1; pcri_g8716.t1	pcri_g8720.t1; pcri_g8718.t1; pcri_g8045.t1; pcri_g8716.t1	0	2	MS2	0.4627		0	200	1	34.5668	1	20171101_blank04.RAW	1350.7
		FALSE	High		Sequest HT (AJ2)	Unambiguous	[R].WLLEGELYNGR.[LV]		4	4	pcri_g8720.t1; pcri_g8718.t1; pcri_g8045.t1; pcri_g8716.t1	pcri_g8720.t1; pcri_g8718.t1; pcri_g8045.t1; pcri_g8716.t1	0	1	MS2	0.38		0	200	1	34.284	1	20171101_04.RAW	1350.87
		FALSE	High		Sequest HT (V2)	Unambiguous	[R].WLLEGELYNGR.[LV]		4	4	pcri_g8720.t1; pcri_g8718.t1; pcri_g8045.t1; pcri_g8716.t1	pcri_g8720.t1; pcri_g8718.t1; pcri_g8045.t1; pcri_g8716.t1	0	2	MS2	0.3976		0	200	1	48.8721	1	20171101_blank08.RAW	1349.95
		FALSE	High		Sequest HT (AA2)	Unambiguous	[R].WLLEGELYNGR.[LV]		4	4	pcri_g8720.t1; pcri_g8718.t1; pcri_g8045.t1; pcri_g8716.t1	pcri_g8720.t1; pcri_g8718.t1; pcri_g8045.t1; pcri_g8716.t1	0	2	MS2	0.4573		0	200	1	55.4043	1	20171101_blank03.RAW	1349.8
		FALSE	High		Sequest HT (AF2)	Unambiguous	[R].WLLEGELYNGR.[LV]		4	4	pcri_g8720.t1; pcri_g8718.t1; pcri_g8045.t1; pcri_g8716.t1	pcri_g8720.t1; pcri_g8718.t1; pcri_g8045.t1; pcri_g8716.t1	0	1	MS2	0.2547		0	200	1	34.5662	1	20171101_08.RAW	1350.75
	FALSE	High	[R].EMGEAGHFGSSTFDPLGLTEANPLGTDYNR.[Q]				1	1	2	pcri_g8045.t1	pcri_g8045.t1	pcri_g8045.t1 [182-211]	0	3183.43	Not Found	High	Not Found	Not Found	Not Found	Not Found	Not Found	Not Found	Not Found	Not Found	Not Found	High	Not Found	Not Found	Not Found	Not Found	Not Found	Not Found	Not Found	Not Found	Not Found	High	5.32	R.EMGEAGHFGSSTFDPLGLTEANPLGTDYNR.Q	[182-211]
		Checked	Confidence		Identifying Node	PSM Ambiguity	Annotated Sequence	Modifications	# Protein Groups	# Proteins	Master Protein Accessions	Protein Accessions	# Missed Cleavages	Charge	MS Order	DeltaScore	Isolation Interference [%]	DeltaCn	Ion Inject Time [ms]	Rank	RT [min]	Search Engine Rank	Spectrum File	MH+ [Da]
		FALSE	High		Sequest HT (T2)	Unambiguous	[R].EMGEAGHFGSSTFDPLGLTEANPLGTDYNR.[Q]		1	1	pcri_g8045.t1	pcri_g8045.t1	0	3	MS2	0.609		0	200	1	34.891	1	20171202_01.RAW	3184.34
		FALSE	High		Sequest HT (AM2)	Unambiguous	[R].EMGEAGHFGSSTFDPLGLTEANPLGTDYNR.[Q]		1	1	pcri_g8045.t1	pcri_g8045.t1	0	3	MS2	0.6245		0	200	1	36.218	1	20171101_01.RAW	3183.92
	FALSE	High	[K].DHLASPFEANIFTYGDK.[G]				1	1	3	pcri_g8045.t1	pcri_g8045.t1	pcri_g8045.t1 [245-261]	0	1924.91	Not Found	High	High	Not Found	Not Found	Not Found	Not Found	Not Found	Not Found	Not Found	Not Found	High	Not Found	Not Found	Not Found	Not Found	Not Found	Not Found	Not Found	Not Found	Not Found	High	4.83	K.DHLASPFEANIFTYGDK.G	[245-261]
		Checked	Confidence		Identifying Node	PSM Ambiguity	Annotated Sequence	Modifications	# Protein Groups	# Proteins	Master Protein Accessions	Protein Accessions	# Missed Cleavages	Charge	MS Order	DeltaScore	Isolation Interference [%]	DeltaCn	Ion Inject Time [ms]	Rank	RT [min]	Search Engine Rank	Spectrum File	MH+ [Da]
		FALSE	High		Sequest HT (AM2)	Unambiguous	[K].DHLASPFEANIFTYGDK.[G]		1	1	pcri_g8045.t1	pcri_g8045.t1	0	2	MS2	0.6667		0	200	1	34.5723	1	20171101_01.RAW	1926.64
		FALSE	High		Sequest HT (T2)	Unambiguous	[K].DHLASPFEANIFTYGDK.[G]		1	1	pcri_g8045.t1	pcri_g8045.t1	0	2	MS2	0.609		0	200	1	32.5391	1	20171202_01.RAW	1926.58
		FALSE	High		Sequest HT (AB2)	Unambiguous	[K].DHLASPFEANIFTYGDK.[G]		1	1	pcri_g8045.t1	pcri_g8045.t1	0	3	MS2	0.4274		0	200	1	34.5731	1	20171101_blank02.RAW	1926.11
	FALSE	High	[R].LAMLAVVGVLTVEAQGK.[G]				2	2	5	pcri_g8720.t1; pcri_g8045.t1	pcri_g8720.t1 pcri_g8045.t1	pcri_g8720.t1 [66-82]; pcri_g8045.t1 [125-141]	0	1698.98	Not Found	Not Found	Not Found	Not Found	Not Found	Not Found	Not Found	High	High	Not Found	Not Found	Not Found	Not Found	Not Found	Not Found	Not Found	Not Found	Not Found	High	Not Found	Not Found	High	3.77	R.LAMLAVVGVLTVEAQGK.G	[125-141]
		Checked	Confidence		Identifying Node	PSM Ambiguity	Annotated Sequence	Modifications	# Protein Groups	# Proteins	Master Protein Accessions	Protein Accessions	# Missed Cleavages	Charge	MS Order	DeltaScore	Isolation Interference [%]	DeltaCn	Ion Inject Time [ms]	Rank	RT [min]	Search Engine Rank	Spectrum File	MH+ [Da]
		FALSE	High		Sequest HT (AJ2)	Unambiguous	[R].LAMLAVVGVLTVEAQGK.[G]		2	2	pcri_g8720.t1; pcri_g8045.t1	pcri_g8720.t1; pcri_g8045.t1	0	3	MS2	0.4668		0	200	1	46.9382	1	20171101_04.RAW	1702.17
		FALSE	High		Sequest HT (U2)	Unambiguous	[R].LAMLAVVGVLTVEAQGK.[G]		2	2	pcri_g8720.t1; pcri_g8045.t1	pcri_g8720.t1; pcri_g8045.t1	0	3	MS2	0.2955		0	200	1	35.6564	1	20171101_blank09.RAW	1701.93
		FALSE	High		Sequest HT (X2)	Unambiguous	[R].LAMLAVVGVLTVEAQGK.[G]		2	2	pcri_g8720.t1; pcri_g8045.t1	pcri_g8720.t1; pcri_g8045.t1	0	3	MS2	0.2761		0	200	1	35.4825	1	20171101_blank06.RAW	1702.08
		FALSE	High		Sequest HT (Y2)	Unambiguous	[R].LAMLAVVGVLTVEAQGK.[G]		2	2	pcri_g8720.t1; pcri_g8045.t1	pcri_g8720.t1; pcri_g8045.t1	0	3	MS2	0.2928		0	200	1	35.1806	1	20171101_blank05.RAW	1702.18
		FALSE	High		Sequest HT (E2)	Unambiguous	[R].LAMLAVVGVLTVEAQGK.[G]		2	2	pcri_g8720.t1; pcri_g8045.t1	pcri_g8720.t1; pcri_g8045.t1	0	3	MS2	0.2765		0	200	1	33.7274	1	20171202_blank06.RAW	1701.91
	FALSE	High	[K].GPIENAK.[D]				4	4	6	pcri_g8720.t1; pcri_g8718.t1; pcri_g8045.t1; pcri_g8716.t1	pcri_g8720.t1 pcri_g8718.t1 pcri_g8045.t1 pcri_g8716.t1	pcri_g8720.t1 [179-185]; pcri_g8718.t1 [243-249]; pcri_g8045.t1 [238-244]; pcri_g8716.t1 [243-249]	0	728.394	Not Found	Not Found	Not Found	High	Not Found	Not Found	Not Found	High	Not Found	Not Found	Not Found	Not Found	Not Found	High	Not Found	Not Found	Not Found	Not Found	Not Found	Not Found	Not Found	High	1.79	K.GPIENAK.D	[238-244]
		Checked	Confidence		Identifying Node	PSM Ambiguity	Annotated Sequence	Modifications	# Protein Groups	# Proteins	Master Protein Accessions	Protein Accessions	# Missed Cleavages	Charge	MS Order	DeltaScore	Isolation Interference [%]	DeltaCn	Ion Inject Time [ms]	Rank	RT [min]	Search Engine Rank	Spectrum File	MH+ [Da]
		FALSE	High		Sequest HT (AJ2)	Unambiguous	[K].GPIENAK.[D]		4	4	pcri_g8720.t1; pcri_g8718.t1; pcri_g8045.t1; pcri_g8716.t1	pcri_g8720.t1; pcri_g8718.t1; pcri_g8045.t1; pcri_g8716.t1	0	1	MS2	0.2011		0	200	1	13.6354	1	20171101_04.RAW	728.73
		FALSE	High		Sequest HT (S2)	Unambiguous	[K].GPIENAK.[D]		4	4	pcri_g8720.t1; pcri_g8718.t1; pcri_g8045.t1; pcri_g8716.t1	pcri_g8720.t1; pcri_g8718.t1; pcri_g8045.t1; pcri_g8716.t1	0	1	MS2	0.226		0	200	1	11.3199	1	20171202_02.RAW	728.608
		FALSE	High		Sequest HT (AD2)	Unambiguous	[K].GPIENAK.[D]		4	4	pcri_g8720.t1; pcri_g8718.t1; pcri_g8045.t1; pcri_g8716.t1	pcri_g8720.t1; pcri_g8718.t1; pcri_g8045.t1; pcri_g8716.t1	0	1	MS2	0.1698		0	200	1	13.5867	1	20171101_10.RAW	728.544
		FALSE	High		Sequest HT (AL2)	Unambiguous	[K].GPIENAK.[D]		4	4	pcri_g8720.t1; pcri_g8718.t1; pcri_g8045.t1; pcri_g8716.t1	pcri_g8720.t1; pcri_g8718.t1; pcri_g8045.t1; pcri_g8716.t1	0	1	MS2	0.1203		0	200	1	14.9467	1	20171101_02.RAW	728.56
		FALSE	High		Sequest HT (AI2)	Unambiguous	[K].GPIENAK.[D]		4	4	pcri_g8720.t1; pcri_g8718.t1; pcri_g8045.t1; pcri_g8716.t1	pcri_g8720.t1; pcri_g8718.t1; pcri_g8045.t1; pcri_g8716.t1	0	1	MS2	0.2792		0	200	1	13.2061	1	20171101_05.RAW	728.569
		FALSE	High		Sequest HT (AI2)	Unambiguous	[K].GPIENAK.[D]		4	4	pcri_g8720.t1; pcri_g8718.t1; pcri_g8045.t1; pcri_g8716.t1	pcri_g8720.t1; pcri_g8718.t1; pcri_g8045.t1; pcri_g8716.t1	0	1	MS2	0.1565		0	200	1	14.4819	1	20171101_05.RAW	728.552
	FALSE	High	[R].GFDPFSLGTSWGQPPVDIDAPK.[Y]				1	1	2	pcri_g8045.t1	pcri_g8045.t1	pcri_g8045.t1 [85-106]	0	2331.13	Not Found	High	Not Found	Not Found	Not Found	Not Found	Not Found	Not Found	Not Found	Not Found	Not Found	High	Not Found	Not Found	Not Found	Not Found	Not Found	Not Found	Not Found	Not Found	Not Found	High	4.27	R.GFDPFSLGTSWGQPPVDIDAPK.Y	[85-106]
		Checked	Confidence		Identifying Node	PSM Ambiguity	Annotated Sequence	Modifications	# Protein Groups	# Proteins	Master Protein Accessions	Protein Accessions	# Missed Cleavages	Charge	MS Order	DeltaScore	Isolation Interference [%]	DeltaCn	Ion Inject Time [ms]	Rank	RT [min]	Search Engine Rank	Spectrum File	MH+ [Da]
		FALSE	High		Sequest HT (AM2)	Unambiguous	[R].GFDPFSLGTSWGQPPVDIDAPK.[Y]		1	1	pcri_g8045.t1	pcri_g8045.t1	0	2	MS2	0.719		0	200	1	38.9115	1	20171101_01.RAW	2331.47
		FALSE	High		Sequest HT (T2)	Unambiguous	[R].GFDPFSLGTSWGQPPVDIDAPK.[Y]		1	1	pcri_g8045.t1	pcri_g8045.t1	0	2	MS2	0.6163		0	200	1	38.0362	1	20171202_01.RAW	2331.98
FALSE	Master Protein	pcri_g2502.t1	CAG9461488.1 unnamed protein product [Pedinophyceae sp. YPF-701]	LHCII	13	2	11	2	1	246	26	4.89	45.15	2	Not Found	Not Found	Not Found	Not Found	Not Found	High	Not Found	Not Found	Not Found	High	Not Found	Not Found	Not Found	Not Found	Not Found	High	Not Found	High	Not Found	High	Not Found
	Checked	Confidence	Annotated Sequence		Modifications	Modifications in Master Proteins	# Protein Groups	# Proteins	# PSMs	Master Protein Accessions	Master Protein Descriptions	Positions in Master Proteins	# Missed Cleavages	Theo. MH+ [Da]	Found in Sample: [S11] F11: Sample	Found in Sample: [S1] F1: Sample	Found in Sample: [S12] F12: Sample	Found in Sample: [S2] F2: Sample	Found in Sample: [S13] F13: Sample	Found in Sample: [S3] F3: Sample	Found in Sample: [S14] F14: Sample	Found in Sample: [S4] F4: Sample	Found in Sample: [S16] F16: Sample	Found in Sample: [S6] F6: Sample	Found in Sample: [S30] F30: Sample	Found in Sample: [S20] F20: Sample	Found in Sample: [S31] F31: Sample	Found in Sample: [S21] F21: Sample	Found in Sample: [S32] F32: Sample	Found in Sample: [S22] F22: Sample	Found in Sample: [S33] F33: Sample	Found in Sample: [S23] F23: Sample	Found in Sample: [S35] F35: Sample	Found in Sample: [S25] F25: Sample	Found in Sample: [S36] F36: Sample	Confidence (by Search Engine): Sequest HT	XCorr (by Search Engine): Sequest HT	Sequence in Protein	Positions in Protein	Peptide Group Modifications in Protein
	FALSE	High	[R].EIELIHSR.[W]				1	2	3	pcri_g2502.t1	pcri_g2502.t1	pcri_g2502.t1 [78-85]	0	996.547	Not Found	Not Found	Not Found	Not Found	Not Found	High	Not Found	Not Found	Not Found	High	Not Found	Not Found	Not Found	Not Found	Not Found	Not Found	Not Found	Not Found	Not Found	Not Found	Not Found	High	2.25	R.EIELIHSR.W	[78-85]
		Checked	Confidence		Identifying Node	PSM Ambiguity	Annotated Sequence	Modifications	# Protein Groups	# Proteins	Master Protein Accessions	Protein Accessions	# Missed Cleavages	Charge	MS Order	DeltaScore	Isolation Interference [%]	DeltaCn	Ion Inject Time [ms]	Rank	RT [min]	Search Engine Rank	Spectrum File	MH+ [Da]
		FALSE	High		Sequest HT (W2)	Unambiguous	[R].EIELIHSR.[W]		1	2	pcri_g2502.t1	pcri_g2502.t1; pcri_g3381.t1	0	2	MS2	0.3244		0	200	1	25.3255	1	20171101_blank07.RAW	997.19
		FALSE	High		Sequest HT (AH2)	Unambiguous	[R].EIELIHSR.[W]		1	2	pcri_g2502.t1	pcri_g2502.t1; pcri_g3381.t1	0	1	MS2	0.3966		0	200	1	25.0601	1	20171101_06.RAW	996.673
		FALSE	High		Sequest HT (AK2)	Unambiguous	[R].EIELIHSR.[W]		1	2	pcri_g2502.t1	pcri_g2502.t1; pcri_g3381.t1	0	1	MS2	0.4647		0	200	1	24.7173	1	20171101_03.RAW	996.681
	FALSE	High	[K].GPIENLNDHLSDPSAVNAFNYATK.[F]				1	3	8	pcri_g2502.t1	pcri_g2502.t1	pcri_g2502.t1 [220-243]	0	2587.24	Not Found	Not Found	Not Found	Not Found	Not Found	Not Found	Not Found	Not Found	Not Found	High	Not Found	Not Found	Not Found	Not Found	Not Found	High	Not Found	High	Not Found	High	Not Found	High	5.73	K.GPIENLNDHLSDPSAVNAFNYATK.F	[220-243]
		Checked	Confidence		Identifying Node	PSM Ambiguity	Annotated Sequence	Modifications	# Protein Groups	# Proteins	Master Protein Accessions	Protein Accessions	# Missed Cleavages	Charge	MS Order	DeltaScore	Isolation Interference [%]	DeltaCn	Ion Inject Time [ms]	Rank	RT [min]	Search Engine Rank	Spectrum File	MH+ [Da]
		FALSE	High		Sequest HT (P2)	Unambiguous	[K].GPIENLNDHLSDPSAVNAFNYATK.[F]		1	3	pcri_g2502.t1	pcri_g2502.t1; pcri_g3381.t1; pcri_g8878.t1	0	3	MS2	0.6283		0	200	1	29.9773	1	20171202_05.RAW	2589.45
		FALSE	High		Sequest HT (O2)	Unambiguous	[K].GPIENLNDHLSDPSAVNAFNYATK.[F]		1	3	pcri_g2502.t1	pcri_g2502.t1; pcri_g3381.t1; pcri_g8878.t1	0	3	MS2	0.5868		0	200	1	28.9285	1	20171202_06.RAW	2589.25
		FALSE	High		Sequest HT (O2)	Unambiguous	[K].GPIENLNDHLSDPSAVNAFNYATK.[F]		1	3	pcri_g2502.t1	pcri_g2502.t1; pcri_g3381.t1; pcri_g8878.t1	0	3	MS2	0.5283		0	200	1	29.7305	1	20171202_06.RAW	2589.11
		FALSE	High		Sequest HT (R2)	Unambiguous	[K].GPIENLNDHLSDPSAVNAFNYATK.[F]		1	3	pcri_g2502.t1	pcri_g2502.t1; pcri_g3381.t1; pcri_g8878.t1	0	3	MS2	0.517		0	200	1	29.5156	1	20171202_03.RAW	2588.58
		FALSE	High		Sequest HT (AI2)	Unambiguous	[K].GPIENLNDHLSDPSAVNAFNYATK.[F]		1	3	pcri_g2502.t1	pcri_g2502.t1; pcri_g3381.t1; pcri_g8878.t1	0	3	MS2	0.5744		0	200	1	31.8171	1	20171101_05.RAW	2589.88
		FALSE	High		Sequest HT (Q2)	Unambiguous	[K].GPIENLNDHLSDPSAVNAFNYATK.[F]		1	3	pcri_g2502.t1	pcri_g2502.t1; pcri_g3381.t1; pcri_g8878.t1	0	3	MS2	0.6305		0	200	1	29.9126	1	20171202_04.RAW	2588.64
		FALSE	High		Sequest HT (AH2)	Unambiguous	[K].GPIENLNDHLSDPSAVNAFNYATK.[F]		1	3	pcri_g2502.t1	pcri_g2502.t1; pcri_g3381.t1; pcri_g8878.t1	0	3	MS2	0.5654		0	200	1	31.9127	1	20171101_06.RAW	2588.3
		FALSE	High		Sequest HT (O2)	Unambiguous	[K].GPIENLNDHLSDPSAVNAFNYATK.[F]		1	3	pcri_g2502.t1	pcri_g2502.t1; pcri_g3381.t1; pcri_g8878.t1	0	3	MS2	0.4097		0	200	1	30.5575	1	20171202_06.RAW	2589.92
FALSE	Master Protein	pcri_g2965.t1	XP_002499539.1 predicted protein [Micromonas commoda] >ACO60797.1 predicted protein [Micromonas commoda]		2	1	4	1	1	825	90.4	8.47	11	1	Not Found	High	Not Found	Not Found	Not Found	High	Not Found	Not Found	Not Found	High	Not Found	Not Found	Not Found	Not Found	Not Found	Not Found	Not Found	Not Found	Not Found	Not Found	Not Found
	Checked	Confidence	Annotated Sequence		Modifications	Modifications in Master Proteins	# Protein Groups	# Proteins	# PSMs	Master Protein Accessions	Master Protein Descriptions	Positions in Master Proteins	# Missed Cleavages	Theo. MH+ [Da]	Found in Sample: [S11] F11: Sample	Found in Sample: [S1] F1: Sample	Found in Sample: [S12] F12: Sample	Found in Sample: [S2] F2: Sample	Found in Sample: [S13] F13: Sample	Found in Sample: [S3] F3: Sample	Found in Sample: [S14] F14: Sample	Found in Sample: [S4] F4: Sample	Found in Sample: [S16] F16: Sample	Found in Sample: [S6] F6: Sample	Found in Sample: [S30] F30: Sample	Found in Sample: [S20] F20: Sample	Found in Sample: [S31] F31: Sample	Found in Sample: [S21] F21: Sample	Found in Sample: [S32] F32: Sample	Found in Sample: [S22] F22: Sample	Found in Sample: [S33] F33: Sample	Found in Sample: [S23] F23: Sample	Found in Sample: [S35] F35: Sample	Found in Sample: [S25] F25: Sample	Found in Sample: [S36] F36: Sample	Confidence (by Search Engine): Sequest HT	XCorr (by Search Engine): Sequest HT	Sequence in Protein	Positions in Protein	Peptide Group Modifications in Protein
	FALSE	High	[R].QTDGSTRPQEKTK.[L]				1	1	4	pcri_g2965.t1	pcri_g2965.t1	pcri_g2965.t1 [603-615]	1	1475.74	Not Found	High	Not Found	Not Found	Not Found	High	Not Found	Not Found	Not Found	High	Not Found	Not Found	Not Found	Not Found	Not Found	Not Found	Not Found	Not Found	Not Found	Not Found	Not Found	High	3.09	R.QTDGSTRPQEKTK.L	[603-615]
		Checked	Confidence		Identifying Node	PSM Ambiguity	Annotated Sequence	Modifications	# Protein Groups	# Proteins	Master Protein Accessions	Protein Accessions	# Missed Cleavages	Charge	MS Order	DeltaScore	Isolation Interference [%]	DeltaCn	Ion Inject Time [ms]	Rank	RT [min]	Search Engine Rank	Spectrum File	MH+ [Da]
		FALSE	High		Sequest HT (AI2)	Unambiguous	[R].QTDGSTRPQEKTK.[L]		1	1	pcri_g2965.t1	pcri_g2965.t1	1	2	MS2	0.178		0	200	1	25.8805	1	20171101_05.RAW	1476.4
		FALSE	High		Sequest HT (AK2)	Unambiguous	[R].QTDGSTRPQEKTK.[L]		1	1	pcri_g2965.t1	pcri_g2965.t1	1	2	MS2	0.1825		0	200	1	25.6593	1	20171101_03.RAW	1476.65
		FALSE	High		Sequest HT (AM2)	Unambiguous	[R].QTDGSTRPQEKTK.[L]		1	1	pcri_g2965.t1	pcri_g2965.t1	1	2	MS2	0.1041		0	200	1	26.0273	1	20171101_01.RAW	1477.78
		FALSE	High		Sequest HT (AH2)	Unambiguous	[R].QTDGSTRPQEKTK.[L]		1	1	pcri_g2965.t1	pcri_g2965.t1	1	2	MS2	0.1653		0	200	1	25.9876	1	20171101_06.RAW	1476.61
FALSE	Master Protein	pcri_g4277.t1	KAI3434722.1 hypothetical protein D9Q98_002783 [Chlorella vulgaris]		2	1	3	1	1	383	40.8	9.44	4.97	1	Not Found	High	Not Found	Not Found	Not Found	Not Found	Not Found	Not Found	Not Found	Not Found	Not Found	Not Found	Not Found	High	Not Found	Not Found	Not Found	Not Found	Not Found	Not Found	Not Found
	Checked	Confidence	Annotated Sequence		Modifications	Modifications in Master Proteins	# Protein Groups	# Proteins	# PSMs	Master Protein Accessions	Master Protein Descriptions	Positions in Master Proteins	# Missed Cleavages	Theo. MH+ [Da]	Found in Sample: [S11] F11: Sample	Found in Sample: [S1] F1: Sample	Found in Sample: [S12] F12: Sample	Found in Sample: [S2] F2: Sample	Found in Sample: [S13] F13: Sample	Found in Sample: [S3] F3: Sample	Found in Sample: [S14] F14: Sample	Found in Sample: [S4] F4: Sample	Found in Sample: [S16] F16: Sample	Found in Sample: [S6] F6: Sample	Found in Sample: [S30] F30: Sample	Found in Sample: [S20] F20: Sample	Found in Sample: [S31] F31: Sample	Found in Sample: [S21] F21: Sample	Found in Sample: [S32] F32: Sample	Found in Sample: [S22] F22: Sample	Found in Sample: [S33] F33: Sample	Found in Sample: [S23] F23: Sample	Found in Sample: [S35] F35: Sample	Found in Sample: [S25] F25: Sample	Found in Sample: [S36] F36: Sample	Confidence (by Search Engine): Sequest HT	XCorr (by Search Engine): Sequest HT	Sequence in Protein	Positions in Protein	Peptide Group Modifications in Protein
	FALSE	High	[R].LSSLPR.[I]				1	1	3	pcri_g4277.t1	pcri_g4277.t1	pcri_g4277.t1 [6-11]	0	672.404	Not Found	High	Not Found	Not Found	Not Found	Not Found	Not Found	Not Found	Not Found	Not Found	Not Found	Not Found	Not Found	High	Not Found	Not Found	Not Found	Not Found	Not Found	Not Found	Not Found	High	1.78	R.LSSLPR.I	[6-11]
		Checked	Confidence		Identifying Node	PSM Ambiguity	Annotated Sequence	Modifications	# Protein Groups	# Proteins	Master Protein Accessions	Protein Accessions	# Missed Cleavages	Charge	MS Order	DeltaScore	Isolation Interference [%]	DeltaCn	Ion Inject Time [ms]	Rank	RT [min]	Search Engine Rank	Spectrum File	MH+ [Da]
		FALSE	High		Sequest HT (S2)	Unambiguous	[R].LSSLPR.[I]		1	1	pcri_g4277.t1	pcri_g4277.t1	0	1	MS2	0.0674		0	200	1	20.5859	1	20171202_02.RAW	672.588
		FALSE	High		Sequest HT (AG2)	Unambiguous	[R].LSSLPR.[I]		1	1	pcri_g4277.t1	pcri_g4277.t1	0	1	MS2	0.1975		0	200	1	25.8437	1	20171101_07.RAW	672.678
		FALSE	High		Sequest HT (AM2)	Unambiguous	[R].LSSLPR.[I]		1	1	pcri_g4277.t1	pcri_g4277.t1	0	1	MS2	0.1274		0	200	1	25.8775	1	20171101_01.RAW	672.496
FALSE	Master Protein	pcri_g5760.t1	PRW56443.1 glutamine--tRNA ligase [Chlorella sorokiniana]		3	1	6	1	1	788	87.6	6.58	23.68	1	Not Found	High	Not Found	Not Found	Not Found	Not Found	Not Found	Not Found	Not Found	Not Found	Not Found	Not Found	Not Found	Not Found	Not Found	Not Found	Not Found	Not Found	Not Found	Not Found	Not Found
	Checked	Confidence	Annotated Sequence		Modifications	Modifications in Master Proteins	# Protein Groups	# Proteins	# PSMs	Master Protein Accessions	Master Protein Descriptions	Positions in Master Proteins	# Missed Cleavages	Theo. MH+ [Da]	Found in Sample: [S11] F11: Sample	Found in Sample: [S1] F1: Sample	Found in Sample: [S12] F12: Sample	Found in Sample: [S2] F2: Sample	Found in Sample: [S13] F13: Sample	Found in Sample: [S3] F3: Sample	Found in Sample: [S14] F14: Sample	Found in Sample: [S4] F4: Sample	Found in Sample: [S16] F16: Sample	Found in Sample: [S6] F6: Sample	Found in Sample: [S30] F30: Sample	Found in Sample: [S20] F20: Sample	Found in Sample: [S31] F31: Sample	Found in Sample: [S21] F21: Sample	Found in Sample: [S32] F32: Sample	Found in Sample: [S22] F22: Sample	Found in Sample: [S33] F33: Sample	Found in Sample: [S23] F23: Sample	Found in Sample: [S35] F35: Sample	Found in Sample: [S25] F25: Sample	Found in Sample: [S36] F36: Sample	Confidence (by Search Engine): Sequest HT	XCorr (by Search Engine): Sequest HT	Sequence in Protein	Positions in Protein	Peptide Group Modifications in Protein
	FALSE	High	[K].FPSNALLHRSTLISYLVAGR.[I]				1	1	6	pcri_g5760.t1	pcri_g5760.t1	pcri_g5760.t1 [67-86]	1	2215.23	Not Found	High	Not Found	Not Found	Not Found	Not Found	Not Found	Not Found	Not Found	Not Found	Not Found	Not Found	Not Found	Not Found	Not Found	Not Found	Not Found	Not Found	Not Found	Not Found	Not Found	High	4.64	K.FPSNALLHRSTLISYLVAGR.I	[67-86]
		Checked	Confidence		Identifying Node	PSM Ambiguity	Annotated Sequence	Modifications	# Protein Groups	# Proteins	Master Protein Accessions	Protein Accessions	# Missed Cleavages	Charge	MS Order	DeltaScore	Isolation Interference [%]	DeltaCn	Ion Inject Time [ms]	Rank	RT [min]	Search Engine Rank	Spectrum File	MH+ [Da]
		FALSE	High		Sequest HT (K2)	Unambiguous	[K].FPSNALLHRSTLISYLVAGR.[I]		1	1	pcri_g5760.t1	pcri_g5760.t1	1	3	MS2	0.1638		0	75.561	1	28.9674	1	20171202_10.RAW	2218.73
		FALSE	High		Sequest HT (AE2)	Unambiguous	[K].FPSNALLHRSTLISYLVAGR.[I]		1	1	pcri_g5760.t1	pcri_g5760.t1	1	3	MS2	0.0578		0	45.544	1	31.2588	1	20171101_09.RAW	2218.67
		FALSE	High		Sequest HT (AM2)	Unambiguous	[K].FPSNALLHRSTLISYLVAGR.[I]		1	1	pcri_g5760.t1	pcri_g5760.t1	1	3	MS2	0.0653		0	200	1	31.3498	1	20171101_01.RAW	2217.99
		FALSE	High		Sequest HT (AG2)	Unambiguous	[K].FPSNALLHRSTLISYLVAGR.[I]		1	1	pcri_g5760.t1	pcri_g5760.t1	1	3	MS2	0.0749		0	133.55	1	31.2605	1	20171101_07.RAW	2219.08
		FALSE	High		Sequest HT (AD2)	Unambiguous	[K].FPSNALLHRSTLISYLVAGR.[I]		1	1	pcri_g5760.t1	pcri_g5760.t1	1	3	MS2	0.1694		0	126.822	1	31.3205	1	20171101_10.RAW	2218.72
		FALSE	High		Sequest HT (AF2)	Unambiguous	[K].FPSNALLHRSTLISYLVAGR.[I]		1	1	pcri_g5760.t1	pcri_g5760.t1	1	3	MS2	0.2129		0	200	1	31.3316	1	20171101_08.RAW	2220.28
FALSE	Master Protein	pcri_g2128.t1	KAG7674363.1 hypothetical protein KSW81_000024 [Chlorella desiccata (nom. nud.)] >KAH7619841.1 putative Cardiolipin synthase (CMP-forming), mitochondrial [Chlorella desiccata (nom. nud.)]		6	1	16	1	1	304	32.8	9.19	42.14	1	Not Found	High	High	Not Found	High	High	High	Not Found	High	High	Not Found	Not Found	Not Found	Not Found	Not Found	Not Found	Not Found	Not Found	Not Found	Not Found	Not Found
	Checked	Confidence	Annotated Sequence		Modifications	Modifications in Master Proteins	# Protein Groups	# Proteins	# PSMs	Master Protein Accessions	Master Protein Descriptions	Positions in Master Proteins	# Missed Cleavages	Theo. MH+ [Da]	Found in Sample: [S11] F11: Sample	Found in Sample: [S1] F1: Sample	Found in Sample: [S12] F12: Sample	Found in Sample: [S2] F2: Sample	Found in Sample: [S13] F13: Sample	Found in Sample: [S3] F3: Sample	Found in Sample: [S14] F14: Sample	Found in Sample: [S4] F4: Sample	Found in Sample: [S16] F16: Sample	Found in Sample: [S6] F6: Sample	Found in Sample: [S30] F30: Sample	Found in Sample: [S20] F20: Sample	Found in Sample: [S31] F31: Sample	Found in Sample: [S21] F21: Sample	Found in Sample: [S32] F32: Sample	Found in Sample: [S22] F22: Sample	Found in Sample: [S33] F33: Sample	Found in Sample: [S23] F23: Sample	Found in Sample: [S35] F35: Sample	Found in Sample: [S25] F25: Sample	Found in Sample: [S36] F36: Sample	Confidence (by Search Engine): Sequest HT	XCorr (by Search Engine): Sequest HT	Sequence in Protein	Positions in Protein	Peptide Group Modifications in Protein
	FALSE	High	[R].NYGTRTNERQPDDNNFLR.[K]				1	1	16	pcri_g2128.t1	pcri_g2128.t1	pcri_g2128.t1 [89-106]	2	2210.03	Not Found	High	High	Not Found	High	High	High	Not Found	High	High	Not Found	Not Found	Not Found	Not Found	Not Found	Not Found	Not Found	Not Found	Not Found	Not Found	Not Found	High	3.52	R.NYGTRTNERQPDDNNFLR.K	[89-106]
		Checked	Confidence		Identifying Node	PSM Ambiguity	Annotated Sequence	Modifications	# Protein Groups	# Proteins	Master Protein Accessions	Protein Accessions	# Missed Cleavages	Charge	MS Order	DeltaScore	Isolation Interference [%]	DeltaCn	Ion Inject Time [ms]	Rank	RT [min]	Search Engine Rank	Spectrum File	MH+ [Da]
		FALSE	High		Sequest HT (AE2)	Unambiguous	[R].NYGTRTNERQPDDNNFLR.[K]		1	1	pcri_g2128.t1	pcri_g2128.t1	2	2	MS2	0.375		0	200	1	36.5221	1	20171101_09.RAW	2211.98
		FALSE	High		Sequest HT (N2)	Unambiguous	[R].NYGTRTNERQPDDNNFLR.[K]		1	1	pcri_g2128.t1	pcri_g2128.t1	2	2	MS2	0.3242		0	200	1	35.0798	1	20171202_07.RAW	2213.12
		FALSE	High		Sequest HT (AF2)	Unambiguous	[R].NYGTRTNERQPDDNNFLR.[K]		1	1	pcri_g2128.t1	pcri_g2128.t1	2	2	MS2	0.3079		0	200	1	36.5658	1	20171101_08.RAW	2212.87
		FALSE	High		Sequest HT (L2)	Unambiguous	[R].NYGTRTNERQPDDNNFLR.[K]		1	1	pcri_g2128.t1	pcri_g2128.t1	2	2	MS2	0.2564		0	200	1	35.0035	1	20171202_09.RAW	2212.03
		FALSE	High		Sequest HT (AD2)	Unambiguous	[R].NYGTRTNERQPDDNNFLR.[K]		1	1	pcri_g2128.t1	pcri_g2128.t1	2	2	MS2	0.2899		0	200	1	36.4524	1	20171101_10.RAW	2212.3
		FALSE	High		Sequest HT (AK2)	Unambiguous	[R].NYGTRTNERQPDDNNFLR.[K]		1	1	pcri_g2128.t1	pcri_g2128.t1	2	2	MS2	0.2027		0	200	1	31.7928	1	20171101_03.RAW	2211.93
		FALSE	High		Sequest HT (AB2)	Unambiguous	[R].NYGTRTNERQPDDNNFLR.[K]		1	1	pcri_g2128.t1	pcri_g2128.t1	2	2	MS2	0.1915		0	200	1	31.3971	1	20171101_blank02.RAW	2212.88
		FALSE	High		Sequest HT (AH2)	Unambiguous	[R].NYGTRTNERQPDDNNFLR.[K]		1	1	pcri_g2128.t1	pcri_g2128.t1	2	2	MS2	0.2381		0	200	1	31.1702	1	20171101_06.RAW	2211.69
		FALSE	High		Sequest HT (AM2)	Unambiguous	[R].NYGTRTNERQPDDNNFLR.[K]		1	1	pcri_g2128.t1	pcri_g2128.t1	2	2	MS2	0.3419		0	200	1	36.6037	1	20171101_01.RAW	2210.74
		FALSE	High		Sequest HT (X2)	Unambiguous	[R].NYGTRTNERQPDDNNFLR.[K]		1	1	pcri_g2128.t1	pcri_g2128.t1	2	2	MS2	0.2593		0	200	1	31.4483	1	20171101_blank06.RAW	2212.93
		FALSE	High		Sequest HT (AK2)	Unambiguous	[R].NYGTRTNERQPDDNNFLR.[K]		1	1	pcri_g2128.t1	pcri_g2128.t1	2	2	MS2	0.0743		0	200	1	31.1363	1	20171101_03.RAW	2212.48
		FALSE	High		Sequest HT (AH2)	Unambiguous	[R].NYGTRTNERQPDDNNFLR.[K]		1	1	pcri_g2128.t1	pcri_g2128.t1	2	2	MS2	0.1585		0	200	1	32.4387	1	20171101_06.RAW	2213.05
		FALSE	High		Sequest HT (AH2)	Unambiguous	[R].NYGTRTNERQPDDNNFLR.[K]		1	1	pcri_g2128.t1	pcri_g2128.t1	2	2	MS2	0.1065		0	200	1	31.8268	1	20171101_06.RAW	2213.44
		FALSE	High		Sequest HT (V2)	Unambiguous	[R].NYGTRTNERQPDDNNFLR.[K]		1	1	pcri_g2128.t1	pcri_g2128.t1	2	2	MS2	0.3794		0	200	1	31.4272	1	20171101_blank08.RAW	2211.73
		FALSE	High		Sequest HT (Z2)	Selected	[R].NYGTRTNERQPDDNNFLR.[K]		1	1	pcri_g2128.t1	pcri_g2128.t1	2	2	MS2	0.0273		0	200	1	31.4151	1	20171101_blank04.RAW	2213.27
		FALSE	High		Sequest HT (AA2)	Unambiguous	[R].NYGTRTNERQPDDNNFLR.[K]		1	1	pcri_g2128.t1	pcri_g2128.t1	2	2	MS2	0.155		0	200	1	31.0865	1	20171101_blank03.RAW	2211.76
FALSE	Master Protein	pcri_g7711.t1	MBA2727273.1 cellulase family glycosylhydrolase [Parachlamydiaceae bacterium]		2	1	1	1	1	524	58.9	7.11	3.06	1	Not Found	Not Found	Not Found	High	Not Found	Not Found	Not Found	Not Found	Not Found	Not Found	Not Found	Not Found	Not Found	Not Found	Not Found	Not Found	Not Found	Not Found	Not Found	Not Found	Not Found	Methyl [N-Term]
	Checked	Confidence	Annotated Sequence		Modifications	Modifications in Master Proteins	# Protein Groups	# Proteins	# PSMs	Master Protein Accessions	Master Protein Descriptions	Positions in Master Proteins	# Missed Cleavages	Theo. MH+ [Da]	Found in Sample: [S11] F11: Sample	Found in Sample: [S1] F1: Sample	Found in Sample: [S12] F12: Sample	Found in Sample: [S2] F2: Sample	Found in Sample: [S13] F13: Sample	Found in Sample: [S3] F3: Sample	Found in Sample: [S14] F14: Sample	Found in Sample: [S4] F4: Sample	Found in Sample: [S16] F16: Sample	Found in Sample: [S6] F6: Sample	Found in Sample: [S30] F30: Sample	Found in Sample: [S20] F20: Sample	Found in Sample: [S31] F31: Sample	Found in Sample: [S21] F21: Sample	Found in Sample: [S32] F32: Sample	Found in Sample: [S22] F22: Sample	Found in Sample: [S33] F33: Sample	Found in Sample: [S23] F23: Sample	Found in Sample: [S35] F35: Sample	Found in Sample: [S25] F25: Sample	Found in Sample: [S36] F36: Sample	Confidence (by Search Engine): Sequest HT	XCorr (by Search Engine): Sequest HT	Sequence in Protein	Positions in Protein	Peptide Group Modifications in Protein
	FALSE	High	[-].MQTVSKSEVLMKR.[W]		1xMethyl [N-Term]	pcri_g7711.t1 1xMethyl [N-Term]	1	1	1	pcri_g7711.t1	pcri_g7711.t1	pcri_g7711.t1 [1-13]	2	1550.84	Not Found	Not Found	Not Found	High	Not Found	Not Found	Not Found	Not Found	Not Found	Not Found	Not Found	Not Found	Not Found	Not Found	Not Found	Not Found	Not Found	Not Found	Not Found	Not Found	Not Found	High	3.06	-.MQTVSKSEVLMKR.W	[1-13]	1xMethyl [N-Term]
		Checked	Confidence		Identifying Node	PSM Ambiguity	Annotated Sequence	Modifications	# Protein Groups	# Proteins	Master Protein Accessions	Protein Accessions	# Missed Cleavages	Charge	MS Order	DeltaScore	Isolation Interference [%]	DeltaCn	Ion Inject Time [ms]	Rank	RT [min]	Search Engine Rank	Spectrum File	MH+ [Da]
		FALSE	High		Sequest HT (AL2)	Unambiguous	[-].mQTVSKSEVLMKR.[W]	N-Term(Prot)(Methyl)	1	1	pcri_g7711.t1	pcri_g7711.t1	2	2	MS2	0.1471		0	96.144	1	26.3675	1	20171101_02.RAW	1553.11
FALSE	Master Protein	pcri_g4649.t1	KAF2935731.1 hypothetical protein DAI22_04g253300 [Oryza sativa Japonica Group]		4	1	1	1	1	367	40.1	8.69	3.04	1	Not Found	Not Found	Not Found	High	Not Found	Not Found	Not Found	Not Found	Not Found	Not Found	Not Found	Not Found	Not Found	Not Found	Not Found	Not Found	Not Found	Not Found	Not Found	Not Found	Not Found
	Checked	Confidence	Annotated Sequence		Modifications	Modifications in Master Proteins	# Protein Groups	# Proteins	# PSMs	Master Protein Accessions	Master Protein Descriptions	Positions in Master Proteins	# Missed Cleavages	Theo. MH+ [Da]	Found in Sample: [S11] F11: Sample	Found in Sample: [S1] F1: Sample	Found in Sample: [S12] F12: Sample	Found in Sample: [S2] F2: Sample	Found in Sample: [S13] F13: Sample	Found in Sample: [S3] F3: Sample	Found in Sample: [S14] F14: Sample	Found in Sample: [S4] F4: Sample	Found in Sample: [S16] F16: Sample	Found in Sample: [S6] F6: Sample	Found in Sample: [S30] F30: Sample	Found in Sample: [S20] F20: Sample	Found in Sample: [S31] F31: Sample	Found in Sample: [S21] F21: Sample	Found in Sample: [S32] F32: Sample	Found in Sample: [S22] F22: Sample	Found in Sample: [S33] F33: Sample	Found in Sample: [S23] F23: Sample	Found in Sample: [S35] F35: Sample	Found in Sample: [S25] F25: Sample	Found in Sample: [S36] F36: Sample	Confidence (by Search Engine): Sequest HT	XCorr (by Search Engine): Sequest HT	Sequence in Protein	Positions in Protein	Peptide Group Modifications in Protein
	FALSE	High	[K].ADRRPPISGGSNAGGR.[M]				1	1	1	pcri_g4649.t1	pcri_g4649.t1	pcri_g4649.t1 [96-111]	1	1567.8	Not Found	Not Found	Not Found	High	Not Found	Not Found	Not Found	Not Found	Not Found	Not Found	Not Found	Not Found	Not Found	Not Found	Not Found	Not Found	Not Found	Not Found	Not Found	Not Found	Not Found	High	3.04	K.ADRRPPISGGSNAGGR.M	[96-111]
		Checked	Confidence		Identifying Node	PSM Ambiguity	Annotated Sequence	Modifications	# Protein Groups	# Proteins	Master Protein Accessions	Protein Accessions	# Missed Cleavages	Charge	MS Order	DeltaScore	Isolation Interference [%]	DeltaCn	Ion Inject Time [ms]	Rank	RT [min]	Search Engine Rank	Spectrum File	MH+ [Da]
		FALSE	High		Sequest HT (AL2)	Unambiguous	[K].ADRRPPISGGSNAGGR.[M]		1	1	pcri_g4649.t1	pcri_g4649.t1	1	2	MS2	0.1743		0	101.483	1	21.619	1	20171101_02.RAW	1569.4
FALSE	Master Protein	pcri_g8827.t1	KAA6425941.1 hypothetical protein FRX49_04316 [Trebouxia sp. A1-2]		3	1	9	1	1	471	51.1	9.5	28.82	1	Not Found	Not Found	Not Found	High	Not Found	High	Not Found	High	Not Found	Not Found	Not Found	High	Not Found	Not Found	Not Found	Not Found	Not Found	Not Found	Not Found	Not Found	Not Found
	Checked	Confidence	Annotated Sequence		Modifications	Modifications in Master Proteins	# Protein Groups	# Proteins	# PSMs	Master Protein Accessions	Master Protein Descriptions	Positions in Master Proteins	# Missed Cleavages	Theo. MH+ [Da]	Found in Sample: [S11] F11: Sample	Found in Sample: [S1] F1: Sample	Found in Sample: [S12] F12: Sample	Found in Sample: [S2] F2: Sample	Found in Sample: [S13] F13: Sample	Found in Sample: [S3] F3: Sample	Found in Sample: [S14] F14: Sample	Found in Sample: [S4] F4: Sample	Found in Sample: [S16] F16: Sample	Found in Sample: [S6] F6: Sample	Found in Sample: [S30] F30: Sample	Found in Sample: [S20] F20: Sample	Found in Sample: [S31] F31: Sample	Found in Sample: [S21] F21: Sample	Found in Sample: [S32] F32: Sample	Found in Sample: [S22] F22: Sample	Found in Sample: [S33] F33: Sample	Found in Sample: [S23] F23: Sample	Found in Sample: [S35] F35: Sample	Found in Sample: [S25] F25: Sample	Found in Sample: [S36] F36: Sample	Confidence (by Search Engine): Sequest HT	XCorr (by Search Engine): Sequest HT	Sequence in Protein	Positions in Protein	Peptide Group Modifications in Protein
	FALSE	High	[R].LDVSDELLQKAK.[KR]				1	2	9	pcri_g8827.t1	pcri_g8827.t1	pcri_g8827.t1 [404-415]	1	1358.75	Not Found	Not Found	Not Found	High	Not Found	High	Not Found	High	Not Found	Not Found	Not Found	High	Not Found	Not Found	Not Found	Not Found	Not Found	Not Found	Not Found	Not Found	Not Found	High	3.84	R.LDVSDELLQKAK.R	[404-415]
		Checked	Confidence		Identifying Node	PSM Ambiguity	Annotated Sequence	Modifications	# Protein Groups	# Proteins	Master Protein Accessions	Protein Accessions	# Missed Cleavages	Charge	MS Order	DeltaScore	Isolation Interference [%]	DeltaCn	Ion Inject Time [ms]	Rank	RT [min]	Search Engine Rank	Spectrum File	MH+ [Da]
		FALSE	High		Sequest HT (AJ2)	Unambiguous	[R].LDVSDELLQKAK.[KR]		1	2	pcri_g8827.t1	pcri_g6680.t1; pcri_g8827.t1	1	2	MS2	0.1016		0	200	1	29.7766	1	20171101_04.RAW	1361.59
		FALSE	High		Sequest HT (AD2)	Unambiguous	[R].LDVSDELLQKAK.[KR]		1	2	pcri_g8827.t1	pcri_g6680.t1; pcri_g8827.t1	1	2	MS2	0.1903		0	200	1	30.0565	1	20171101_10.RAW	1359.59
		FALSE	High		Sequest HT (AE2)	Unambiguous	[R].LDVSDELLQKAK.[KR]		1	2	pcri_g8827.t1	pcri_g6680.t1; pcri_g8827.t1	1	2	MS2	0.1597		0	200	1	29.902	1	20171101_09.RAW	1358.45
		FALSE	High		Sequest HT (T2)	Unambiguous	[R].LDVSDELLQKAK.[KR]		1	2	pcri_g8827.t1	pcri_g6680.t1; pcri_g8827.t1	1	2	MS2	0.266		0	200	1	27.0782	1	20171202_01.RAW	1357.88
		FALSE	High		Sequest HT (AF2)	Unambiguous	[R].LDVSDELLQKAK.[KR]		1	2	pcri_g8827.t1	pcri_g6680.t1; pcri_g8827.t1	1	2	MS2	0.2019		0	200	1	30.0431	1	20171101_08.RAW	1357.86
		FALSE	High		Sequest HT (L2)	Unambiguous	[R].LDVSDELLQKAK.[KR]		1	2	pcri_g8827.t1	pcri_g6680.t1; pcri_g8827.t1	1	2	MS2	0.2412		0	200	1	27.0286	1	20171202_09.RAW	1358.17
		FALSE	High		Sequest HT (P2)	Unambiguous	[R].LDVSDELLQKAK.[KR]		1	2	pcri_g8827.t1	pcri_g6680.t1; pcri_g8827.t1	1	2	MS2	0.2129		0	200	1	26.9415	1	20171202_05.RAW	1358.38
		FALSE	High		Sequest HT (AK2)	Unambiguous	[R].LDVSDELLQKAK.[KR]		1	2	pcri_g8827.t1	pcri_g6680.t1; pcri_g8827.t1	1	2	MS2	0.2712		0	200	1	29.8849	1	20171101_03.RAW	1358.22
		FALSE	High		Sequest HT (AL2)	Unambiguous	[R].LDVSDELLQKAK.[KR]		1	2	pcri_g8827.t1	pcri_g6680.t1; pcri_g8827.t1	1	2	MS2	0.1475		0	200	1	29.5775	1	20171101_02.RAW	1358.3
FALSE	Master Protein	pcri_g7611.t1	PSC74065.1 Rubisco activase [Micractinium conductrix]		4	2	6	2	1	420	46.1	8.75	11.3	2	Not Found	Not Found	Not Found	Not Found	Not Found	High	Not Found	Not Found	Not Found	Not Found	High	High	Not Found	Not Found	Not Found	Not Found	Not Found	Not Found	Not Found	Not Found	Not Found
	Checked	Confidence	Annotated Sequence		Modifications	Modifications in Master Proteins	# Protein Groups	# Proteins	# PSMs	Master Protein Accessions	Master Protein Descriptions	Positions in Master Proteins	# Missed Cleavages	Theo. MH+ [Da]	Found in Sample: [S11] F11: Sample	Found in Sample: [S1] F1: Sample	Found in Sample: [S12] F12: Sample	Found in Sample: [S2] F2: Sample	Found in Sample: [S13] F13: Sample	Found in Sample: [S3] F3: Sample	Found in Sample: [S14] F14: Sample	Found in Sample: [S4] F4: Sample	Found in Sample: [S16] F16: Sample	Found in Sample: [S6] F6: Sample	Found in Sample: [S30] F30: Sample	Found in Sample: [S20] F20: Sample	Found in Sample: [S31] F31: Sample	Found in Sample: [S21] F21: Sample	Found in Sample: [S32] F32: Sample	Found in Sample: [S22] F22: Sample	Found in Sample: [S33] F33: Sample	Found in Sample: [S23] F23: Sample	Found in Sample: [S35] F35: Sample	Found in Sample: [S25] F25: Sample	Found in Sample: [S36] F36: Sample	Confidence (by Search Engine): Sequest HT	XCorr (by Search Engine): Sequest HT	Sequence in Protein	Positions in Protein	Peptide Group Modifications in Protein
[truncated: 335 more rows]
